# Supplementary material for: Comparison of Fusarium graminearum Transcriptomes on Living or Dead Wheat Differentiates Substrate-Responsive and Defense-Responsive Genes
Source: PubMed Central journal article supplement (PMC4960244; doi:10.3389/fmicb.2016.01113), 2016-07-26
Supplement: Image1.pdf [file Image1.pdf]

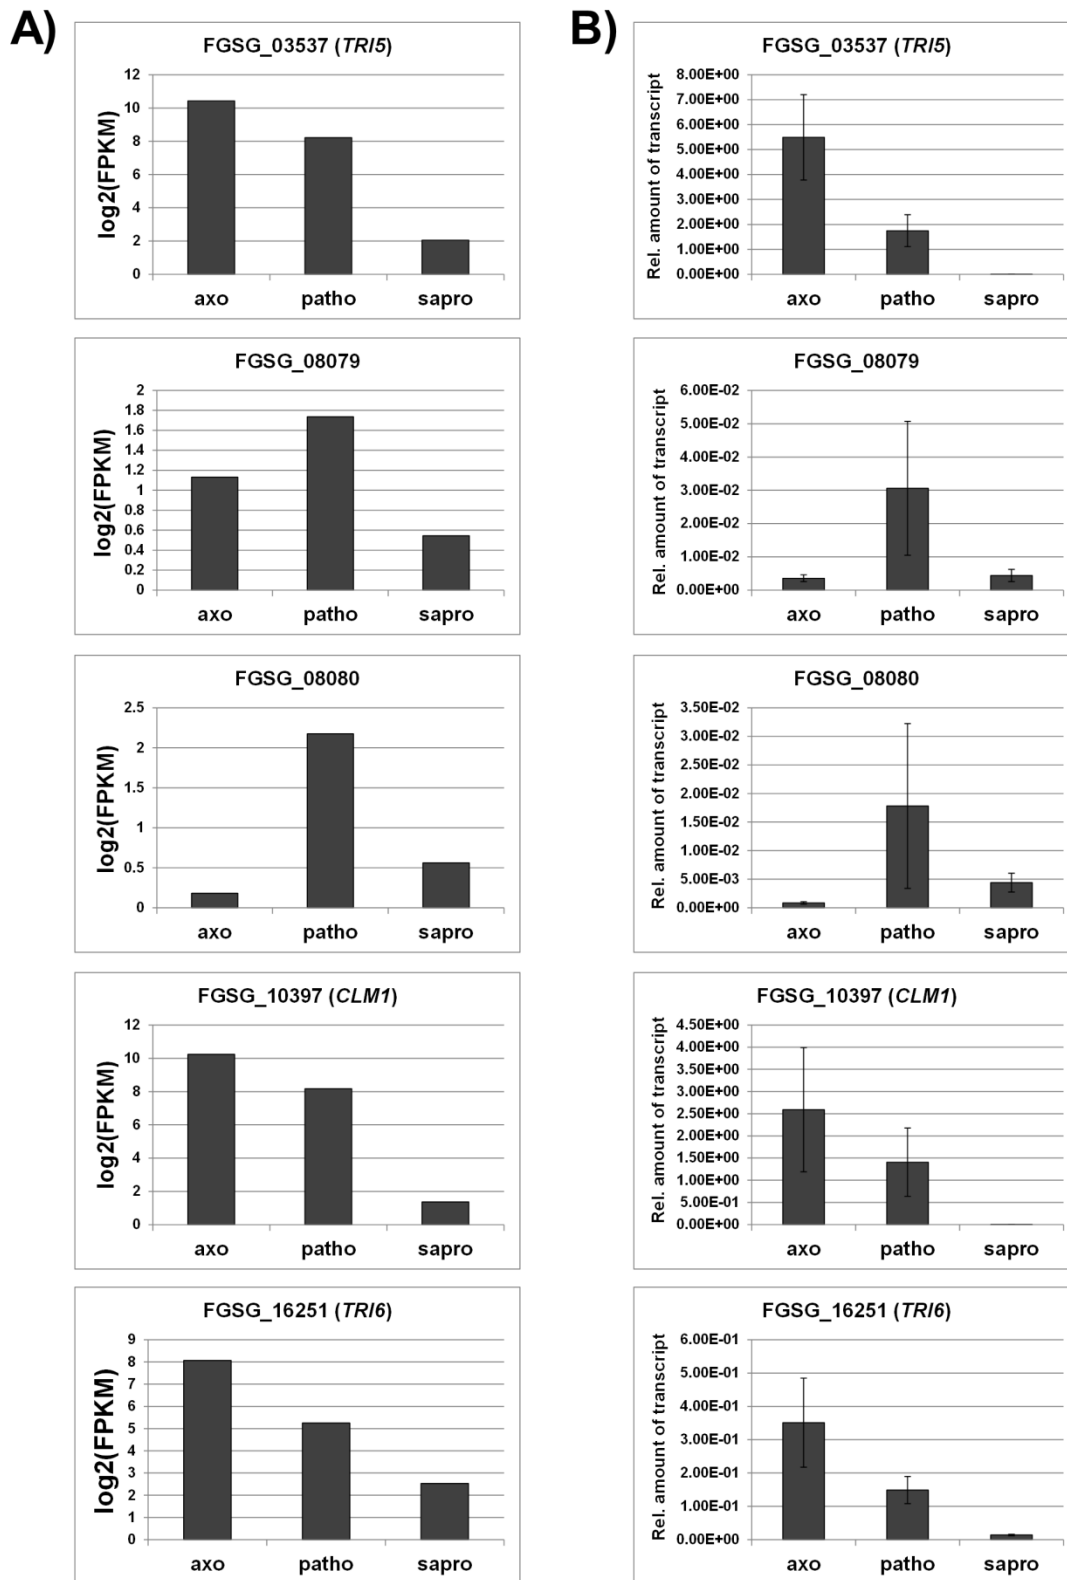

**Figure S1:** Verification of relative transcript abundances found in RNA-seq analysis (A) by RT-qPCR (B). Details of RNA-seq analysis and primers as well as conditions for RT-qPCR are described in Materials and Methods (Patho... pathogenic growth; sapro... saprophytic growth; axo... axenic growth on L-ornithine).
