# Supplementary material for: Comparison of Fusarium graminearum Transcriptomes on Living or Dead Wheat Differentiates Substrate-Responsive and Defense-Responsive Genes
Source: Front Microbiol. 2016 Jul 26;7:1113. doi: 10.3389/fmicb.2016.01113 (PMC4960244; doi:10.3389/fmicb.2016.01113)
Supplement: Supplementary file 5 [file Table2.xlsx]

## Sheet: Description
Table S2: FunCat Analysis of 65 % share of highest expressed genes within the different growth conditions (patho... pathogenic growth, sapro... saprophytic growth, axo... axenic growth on L-ornithine).
	The individual register tabs contain functional analyses of the appropriate gene amounts indicated by the Venn diagram in Figure 5B.
	Diagrams show enriched functional categories (p value < 0.05 or < 0.01) as well as the relSET/ relGENOME values of the respective categories.
	The relSET/ relGENOME value indicates the number of genes annotated within a certain category relative to the total number of genes within the analysed gene set divided by the number of genes in the genome annotated within the respective category relative to the total number of genes in the genome.
	The relSET/ relGENOME value reflects the enrichment of a category within the analysed gene set relative to the occurrence within the genome.

## Sheet: genelists
Patho (65 % of highest)_ 8987 genes	Sapro (65 % of highest)_ 8987 genes	Axenic (65 % of highest)_ 8987 genes	Patho_only_368 genes	Sapro_only_768 genes	Axenic_only_452 genes	Patho_Sapro_418 genes	Patho_Axo_734 genes	Sapro_Axo_334 genes	Patho_Sapro_Axo_7467 genes
FGSG_17054	FGSG_17054	FGSG_17054	FGSG_08178	FGSG_12011	FGSG_10443	FGSG_03166	FGSG_07671	FGSG_03130	FGSG_17054
FGSG_00681	FGSG_04399	FGSG_04399	FGSG_07582	FGSG_08085	FGSG_11460	FGSG_00028	FGSG_03460	FGSG_03046	FGSG_00681
FGSG_10222	FGSG_13392	FGSG_00681	FGSG_00237	FGSG_15259	FGSG_11748	FGSG_03315	FGSG_03894	FGSG_10999	FGSG_10222
FGSG_04399	FGSG_12209	FGSG_14018	FGSG_03432	FGSG_07558	FGSG_17542	FGSG_09353	FGSG_11310	FGSG_12830	FGSG_04399
FGSG_06921	FGSG_10222	FGSG_03028	FGSG_10990	FGSG_03628	FGSG_00047	FGSG_01531	FGSG_08343	FGSG_12456	FGSG_06921
FGSG_16498	FGSG_04745	FGSG_05928	FGSG_01693	FGSG_08011	FGSG_03476	FGSG_04603	FGSG_04512	FGSG_16834	FGSG_16498
FGSG_07181	FGSG_13869	FGSG_12666	FGSG_02861	FGSG_13411	FGSG_03285	FGSG_09827	FGSG_02903	FGSG_13870	FGSG_07181
FGSG_08743	FGSG_12666	FGSG_12110	FGSG_10587	FGSG_17405	FGSG_11023	FGSG_10420	FGSG_04580	FGSG_07743	FGSG_08743
FGSG_05378	FGSG_05378	FGSG_03539	FGSG_04589	FGSG_03795	FGSG_11658	FGSG_13954	FGSG_03537	FGSG_15438	FGSG_05378
FGSG_13392	FGSG_07181	FGSG_10222	FGSG_03175	FGSG_08246	FGSG_16217	FGSG_09390	FGSG_10397	FGSG_02645	FGSG_13392
FGSG_07152	FGSG_16498	FGSG_16498	FGSG_02296	FGSG_12503	FGSG_00036	FGSG_03467	FGSG_03185	FGSG_15542	FGSG_07152
FGSG_10969	FGSG_04915	FGSG_00260	FGSG_07612	FGSG_11304	FGSG_11022	FGSG_11738	FGSG_04596	FGSG_15464	FGSG_10969
FGSG_14018	FGSG_06921	FGSG_16912	FGSG_11397	FGSG_03264	FGSG_00145	FGSG_16329	FGSG_11467	FGSG_15073	FGSG_14018
FGSG_04915	FGSG_15273	FGSG_10224	FGSG_10992	FGSG_15863	FGSG_13994	FGSG_03354	FGSG_04581	FGSG_06550	FGSG_04915
FGSG_08657	FGSG_13505	FGSG_04915	FGSG_04590	FGSG_11428	FGSG_04806	FGSG_11295	FGSG_11399	FGSG_13289	FGSG_08657
FGSG_11922	FGSG_09066	FGSG_07181	FGSG_04591	FGSG_04848	FGSG_12123	FGSG_11249	FGSG_03543	FGSG_13367	FGSG_11922
FGSG_01195	FGSG_15648	FGSG_08238	FGSG_03762	FGSG_11104	FGSG_00038	FGSG_11027	FGSG_03412	FGSG_08206	FGSG_01195
FGSG_06407	FGSG_01960	FGSG_09066	FGSG_07713	FGSG_03593	FGSG_00054	FGSG_11008	FGSG_10529	FGSG_15933	FGSG_06407
FGSG_06757	FGSG_11922	FGSG_05378	FGSG_16849	FGSG_07822	FGSG_02864	FGSG_11095	FGSG_02279	FGSG_15089	FGSG_06757
FGSG_01956	FGSG_04290	FGSG_12607	FGSG_11396	FGSG_00016	FGSG_15487	FGSG_07542	FGSG_02672	FGSG_15286	FGSG_01956
FGSG_08659	FGSG_04881	FGSG_11757	FGSG_04773	FGSG_03424	FGSG_17543	FGSG_10921	FGSG_03072	FGSG_10603	FGSG_08659
FGSG_09879	FGSG_06757	FGSG_06188	FGSG_10989	FGSG_10614	FGSG_02034	FGSG_03124	FGSG_12451	FGSG_02117	FGSG_09879
FGSG_06188	FGSG_03130	FGSG_16176	FGSG_16088	FGSG_17106	FGSG_10803	FGSG_16532	FGSG_11025	FGSG_02556	FGSG_06188
FGSG_01267	FGSG_10942	FGSG_15648	FGSG_06482	FGSG_01752	FGSG_17541	FGSG_11303	FGSG_10617	FGSG_08825	FGSG_01267
FGSG_15648	FGSG_03046	FGSG_13378	FGSG_16087	FGSG_02285	FGSG_11269	FGSG_02925	FGSG_11409	FGSG_13515	FGSG_15648
FGSG_06020	FGSG_00260	FGSG_02578	FGSG_04593	FGSG_16018	FGSG_08465	FGSG_11029	FGSG_03369	FGSG_11112	FGSG_06020
FGSG_10942	FGSG_01195	FGSG_01195	FGSG_04693	FGSG_12119	FGSG_11270	FGSG_03624	FGSG_09335	FGSG_15857	FGSG_10942
FGSG_08670	FGSG_05916	FGSG_10019	FGSG_12647	FGSG_09133	FGSG_09101	FGSG_17574	FGSG_04378	FGSG_02319	FGSG_08670
FGSG_09430	FGSG_06407	FGSG_04290	FGSG_17073	FGSG_02558	FGSG_16202	FGSG_01993	FGSG_08347	FGSG_15499	FGSG_09430
FGSG_03028	FGSG_09430	FGSG_01960	FGSG_10872	FGSG_03144	FGSG_15587	FGSG_03438	FGSG_03546	FGSG_06656	FGSG_03028
FGSG_06010	FGSG_07390	FGSG_15273	FGSG_06554	FGSG_02668	FGSG_03026	FGSG_03828	FGSG_09053	FGSG_13701	FGSG_06010
FGSG_01960	FGSG_10202	FGSG_06921	FGSG_04450	FGSG_04761	FGSG_07707	FGSG_13761	FGSG_15598	FGSG_01537	FGSG_01960
FGSG_17049	FGSG_09879	FGSG_13689	FGSG_16526	FGSG_00122	FGSG_17072	FGSG_02866	FGSG_03534	FGSG_07366	FGSG_17049
FGSG_10941	FGSG_08670	FGSG_00894	FGSG_03483	FGSG_02217	FGSG_08255	FGSG_04245	FGSG_03532	FGSG_13518	FGSG_10941
FGSG_06893	FGSG_00777	FGSG_04805	FGSG_04692	FGSG_13109	FGSG_11464	FGSG_15145	FGSG_10993	FGSG_07683	FGSG_06893
FGSG_04290	FGSG_00894	FGSG_09430	FGSG_17647	FGSG_17094	FGSG_07501	FGSG_15461	FGSG_11480	FGSG_12224	FGSG_04290
FGSG_05493	FGSG_04289	FGSG_01888	FGSG_07560	FGSG_11258	FGSG_03683	FGSG_12387	FGSG_09595	FGSG_02723	FGSG_05493
FGSG_10368	FGSG_04735	FGSG_03662	FGSG_07642	FGSG_02162	FGSG_16069	FGSG_11302	FGSG_10994	FGSG_07742	FGSG_10368
FGSG_04476	FGSG_05266	FGSG_09879	FGSG_02432	FGSG_03143	FGSG_15172	FGSG_12659	FGSG_04686	FGSG_12965	FGSG_04476
FGSG_05916	FGSG_06020	FGSG_03445	FGSG_13654	FGSG_02114	FGSG_09051	FGSG_13737	FGSG_03014	FGSG_07553	FGSG_05916
FGSG_05605	FGSG_05605	FGSG_04289	FGSG_02917	FGSG_02216	FGSG_04023	FGSG_03113	FGSG_13199	FGSG_17663	FGSG_05605
FGSG_07390	FGSG_10941	FGSG_08657	FGSG_08193	FGSG_09094	FGSG_12977	FGSG_07810	FGSG_01819	FGSG_16418	FGSG_07390
FGSG_00777	FGSG_13704	FGSG_10135	FGSG_12609	FGSG_09684	FGSG_15990	FGSG_11184	FGSG_12821	FGSG_02050	FGSG_00777
FGSG_05266	FGSG_03565	FGSG_02322	FGSG_00160	FGSG_05868	FGSG_17016	FGSG_00540	FGSG_07678	FGSG_15138	FGSG_05266
FGSG_09974	FGSG_06893	FGSG_11627	FGSG_09329	FGSG_16917	FGSG_17515	FGSG_08048	FGSG_01159	FGSG_02119	FGSG_09974
FGSG_01278	FGSG_04052	FGSG_01672	FGSG_15574	FGSG_14010	FGSG_15115	FGSG_04876	FGSG_03032	FGSG_07300	FGSG_01278
FGSG_01888	FGSG_00798	FGSG_12555	FGSG_11582	FGSG_12829	FGSG_11656	FGSG_13849	FGSG_15834	FGSG_15086	FGSG_01888
FGSG_01021	FGSG_01888	FGSG_00777	FGSG_15627	FGSG_11088	FGSG_10165	FGSG_03842	FGSG_02751	FGSG_08103	FGSG_01021
FGSG_10019	FGSG_10368	FGSG_05266	FGSG_15136	FGSG_15456	FGSG_02084	FGSG_16511	FGSG_06553	FGSG_12174	FGSG_10019
FGSG_00798	FGSG_01021	FGSG_09834	FGSG_11395	FGSG_13189	FGSG_04790	FGSG_03911	FGSG_01828	FGSG_03167	FGSG_00798
FGSG_10245	FGSG_10245	FGSG_07988	FGSG_03713	FGSG_05232	FGSG_04663	FGSG_17697	FGSG_05809	FGSG_01114	FGSG_10245
FGSG_04149	FGSG_01278	FGSG_03586	FGSG_10991	FGSG_02414	FGSG_12976	FGSG_07010	FGSG_11496	FGSG_07630	FGSG_04149
FGSG_10881	FGSG_07220	FGSG_00554	FGSG_15293	FGSG_16154	FGSG_10325	FGSG_09291	FGSG_04661	FGSG_02318	FGSG_10881
FGSG_05640	FGSG_16912	FGSG_06010	FGSG_17639	FGSG_11019	FGSG_02815	FGSG_16084	FGSG_02378	FGSG_17085	FGSG_05640
FGSG_06048	FGSG_10181	FGSG_10202	FGSG_03080	FGSG_15604	FGSG_11774	FGSG_02915	FGSG_05342	FGSG_05167	FGSG_06048
FGSG_00395	FGSG_05640	FGSG_10855	FGSG_08003	FGSG_04637	FGSG_15673	FGSG_03589	FGSG_03688	FGSG_06439	FGSG_00395
FGSG_06846	FGSG_04149	FGSG_01655	FGSG_03024	FGSG_16275	FGSG_15378	FGSG_03172	FGSG_09140	FGSG_06015	FGSG_06846
FGSG_08895	FGSG_17681	FGSG_03126	FGSG_11106	FGSG_02135	FGSG_08424	FGSG_02821	FGSG_02863	FGSG_06062	FGSG_08895
FGSG_12666	FGSG_13782	FGSG_15451	FGSG_16964	FGSG_11229	FGSG_13465	FGSG_01379	FGSG_03710	FGSG_03575	FGSG_12666
FGSG_10181	FGSG_09974	FGSG_07896	FGSG_13304	FGSG_11003	FGSG_13470	FGSG_15251	FGSG_15955	FGSG_03239	FGSG_10181
FGSG_08811	FGSG_04137	FGSG_05491	FGSG_05612	FGSG_17388	FGSG_10550	FGSG_01831	FGSG_03542	FGSG_08097	FGSG_08811
FGSG_01504	FGSG_11164	FGSG_03295	FGSG_13536	FGSG_17032	FGSG_11683	FGSG_15119	FGSG_08415	FGSG_07358	FGSG_01504
FGSG_16912	FGSG_06846	FGSG_00917	FGSG_02870	FGSG_04525	FGSG_17466	FGSG_16195	FGSG_03745	FGSG_10997	FGSG_16912
FGSG_05999	FGSG_04476	FGSG_04052	FGSG_07570	FGSG_06549	FGSG_03146	FGSG_15501	FGSG_10498	FGSG_10655	FGSG_05999
FGSG_13464	FGSG_11627	FGSG_08196	FGSG_16400	FGSG_06548	FGSG_06513	FGSG_05080	FGSG_11275	FGSG_15736	FGSG_13464
FGSG_10202	FGSG_04933	FGSG_07390	FGSG_00101	FGSG_12012	FGSG_15294	FGSG_03987	FGSG_07783	FGSG_00163	FGSG_10202
FGSG_07292	FGSG_13910	FGSG_10942	FGSG_08002	FGSG_11495	FGSG_13088	FGSG_02613	FGSG_03303	FGSG_02931	FGSG_07292
FGSG_01154	FGSG_10969	FGSG_11922	FGSG_15253	FGSG_11052	FGSG_10444	FGSG_13227	FGSG_03751	FGSG_00351	FGSG_01154
FGSG_04289	FGSG_00395	FGSG_11626	FGSG_10489	FGSG_09083	FGSG_15755	FGSG_06452	FGSG_06538	FGSG_15704	FGSG_04289
FGSG_01655	FGSG_01956	FGSG_06846	FGSG_03640	FGSG_04810	FGSG_15466	FGSG_02839	FGSG_12445	FGSG_15360	FGSG_01655
FGSG_04137	FGSG_08895	FGSG_03535	FGSG_15061	FGSG_17424	FGSG_15768	FGSG_15426	FGSG_03033	FGSG_04696	FGSG_04137
FGSG_07480	FGSG_12214	FGSG_07913	FGSG_04592	FGSG_11219	FGSG_06989	FGSG_04953	FGSG_17598	FGSG_12944	FGSG_07480
FGSG_06692	FGSG_12011	FGSG_06048	FGSG_08058	FGSG_08244	FGSG_02552	FGSG_16683	FGSG_03541	FGSG_11749	FGSG_06692
FGSG_11627	FGSG_07152	FGSG_06407	FGSG_06462	FGSG_15807	FGSG_04133	FGSG_11044	FGSG_16349	FGSG_06095	FGSG_11627
FGSG_04933	FGSG_10999	FGSG_07130	FGSG_04709	FGSG_10613	FGSG_03330	FGSG_11305	FGSG_07891	FGSG_12536	FGSG_04933
FGSG_06021	FGSG_04805	FGSG_16627	FGSG_04588	FGSG_11208	FGSG_15695	FGSG_10560	FGSG_02641	FGSG_15231	FGSG_06021
FGSG_10733	FGSG_00492	FGSG_08122	FGSG_03547	FGSG_11000	FGSG_15944	FGSG_08210	FGSG_05159	FGSG_08877	FGSG_10733
FGSG_03539	FGSG_01504	FGSG_13392	FGSG_03548	FGSG_07695	FGSG_12612	FGSG_02538	FGSG_00172	FGSG_16089	FGSG_03539
FGSG_09825	FGSG_00571	FGSG_05361	FGSG_10995	FGSG_16374	FGSG_13458	FGSG_04302	FGSG_03510	FGSG_07916	FGSG_09825
FGSG_05361	FGSG_12830	FGSG_10089	FGSG_05330	FGSG_03609	FGSG_17576	FGSG_17077	FGSG_16218	FGSG_03676	FGSG_05361
FGSG_03662	FGSG_09286	FGSG_05186	FGSG_04060	FGSG_04766	FGSG_03112	FGSG_07660	FGSG_12570	FGSG_12424	FGSG_03662
FGSG_08238	FGSG_05493	FGSG_08721	FGSG_03956	FGSG_02186	FGSG_11569	FGSG_04599	FGSG_03422	FGSG_15935	FGSG_08238
FGSG_06270	FGSG_05999	FGSG_00071	FGSG_09038	FGSG_11251	FGSG_12591	FGSG_02379	FGSG_04178	FGSG_03246	FGSG_06270
FGSG_00310	FGSG_08811	FGSG_08670	FGSG_12841	FGSG_11204	FGSG_11412	FGSG_03178	FGSG_07679	FGSG_11918	FGSG_00310
FGSG_01081	FGSG_06021	FGSG_13464	FGSG_15156	FGSG_02895	FGSG_15284	FGSG_03083	FGSG_09088	FGSG_09682	FGSG_01081
FGSG_04881	FGSG_08659	FGSG_08811	FGSG_10606	FGSG_04465	FGSG_13433	FGSG_04584	FGSG_11773	FGSG_11191	FGSG_04881
FGSG_08561	FGSG_04975	FGSG_02469	FGSG_16340	FGSG_11105	FGSG_02750	FGSG_03163	FGSG_05036	FGSG_15753	FGSG_08561
FGSG_10246	FGSG_12151	FGSG_08768	FGSG_01771	FGSG_11066	FGSG_13422	FGSG_00539	FGSG_00194	FGSG_16665	FGSG_10246
FGSG_09972	FGSG_10881	FGSG_06757	FGSG_05983	FGSG_17400	FGSG_15037	FGSG_04610	FGSG_07596	FGSG_12932	FGSG_09972
FGSG_06924	FGSG_03448	FGSG_13910	FGSG_03747	FGSG_11341	FGSG_11374	FGSG_10563	FGSG_15492	FGSG_12211	FGSG_06924
FGSG_13685	FGSG_08743	FGSG_15019	FGSG_08830	FGSG_03981	FGSG_12386	FGSG_07543	FGSG_17346	FGSG_13374	FGSG_13685
FGSG_00894	FGSG_07292	FGSG_06893	FGSG_11556	FGSG_02748	FGSG_13511	FGSG_10982	FGSG_07837	FGSG_13598	FGSG_00894
FGSG_02493	FGSG_07480	FGSG_10132	FGSG_10081	FGSG_07639	FGSG_16358	FGSG_02249	FGSG_06327	FGSG_17343	FGSG_02493
FGSG_11626	FGSG_01154	FGSG_10881	FGSG_03972	FGSG_15993	FGSG_03214	FGSG_11299	FGSG_12554	FGSG_13759	FGSG_11626
FGSG_04052	FGSG_07913	FGSG_05916	FGSG_07676	FGSG_11225	FGSG_05103	FGSG_03462	FGSG_04757	FGSG_12816	FGSG_04052
FGSG_12028	FGSG_12240	FGSG_07465	FGSG_11211	FGSG_17306	FGSG_13061	FGSG_03096	FGSG_10375	FGSG_02891	FGSG_12028
FGSG_08768	FGSG_06270	FGSG_06526	FGSG_15084	FGSG_12989	FGSG_17219	FGSG_02867	FGSG_11455	FGSG_15372	FGSG_08768
FGSG_00671	FGSG_11064	FGSG_11205	FGSG_15452	FGSG_00023	FGSG_01830	FGSG_06469	FGSG_13421	FGSG_12027	FGSG_00671
FGSG_04353	FGSG_02077	FGSG_04881	FGSG_04335	FGSG_12551	FGSG_15606	FGSG_03247	FGSG_06539	FGSG_12915	FGSG_04353
FGSG_10050	FGSG_01379	FGSG_10740	FGSG_07842	FGSG_15469	FGSG_17408	FGSG_12485	FGSG_07583	FGSG_15535	FGSG_10050
FGSG_01238	FGSG_05663	FGSG_10125	FGSG_17347	FGSG_02111	FGSG_17057	FGSG_03394	FGSG_03706	FGSG_11059	FGSG_01238
FGSG_00917	FGSG_10733	FGSG_10941	FGSG_13885	FGSG_13848	FGSG_13414	FGSG_10712	FGSG_04333	FGSG_17135	FGSG_00917
FGSG_06931	FGSG_01081	FGSG_10264	FGSG_03742	FGSG_04811	FGSG_15192	FGSG_03003	FGSG_02972	FGSG_04823	FGSG_06931
FGSG_03445	FGSG_01655	FGSG_13947	FGSG_01991	FGSG_02899	FGSG_11083	FGSG_04239	FGSG_02685	FGSG_15505	FGSG_03445
FGSG_08682	FGSG_08085	FGSG_10805	FGSG_15277	FGSG_10431	FGSG_15522	FGSG_07631	FGSG_01621	FGSG_15287	FGSG_08682
FGSG_01016	FGSG_03828	FGSG_11855	FGSG_02909	FGSG_01736	FGSG_13344	FGSG_03584	FGSG_03511	FGSG_03588	FGSG_01016
FGSG_09866	FGSG_05491	FGSG_06268	FGSG_07611	FGSG_15901	FGSG_09064	FGSG_04518	FGSG_09232	FGSG_06547	FGSG_09866
FGSG_07048	FGSG_11626	FGSG_10212	FGSG_07641	FGSG_08245	FGSG_15336	FGSG_04430	FGSG_04595	FGSG_13868	FGSG_07048
FGSG_13128	FGSG_10740	FGSG_08477	FGSG_05991	FGSG_04864	FGSG_10533	FGSG_00203	FGSG_04755	FGSG_15168	FGSG_13128
FGSG_01516	FGSG_03695	FGSG_04527	FGSG_16297	FGSG_11175	FGSG_13491	FGSG_05055	FGSG_12436	FGSG_08954	FGSG_01516
FGSG_04136	FGSG_08871	FGSG_06600	FGSG_11555	FGSG_15242	FGSG_04878	FGSG_08681	FGSG_12886	FGSG_12981	FGSG_04136
FGSG_06827	FGSG_08561	FGSG_08871	FGSG_15291	FGSG_03086	FGSG_09416	FGSG_17330	FGSG_02263	FGSG_02939	FGSG_06827
FGSG_10845	FGSG_10400	FGSG_03460	FGSG_16350	FGSG_11546	FGSG_03326	FGSG_15325	FGSG_00578	FGSG_12053	FGSG_10845
FGSG_09741	FGSG_00385	FGSG_04489	FGSG_00126	FGSG_17711	FGSG_13101	FGSG_06605	FGSG_03340	FGSG_16299	FGSG_09741
FGSG_04735	FGSG_08657	FGSG_03448	FGSG_10675	FGSG_03526	FGSG_05841	FGSG_00199	FGSG_04717	FGSG_16353	FGSG_04735
FGSG_08335	FGSG_03211	FGSG_10969	FGSG_10642	FGSG_15691	FGSG_10852	FGSG_05801	FGSG_03687	FGSG_15230	FGSG_08335
FGSG_10125	FGSG_00979	FGSG_16151	FGSG_03900	FGSG_10545	FGSG_03195	FGSG_11531	FGSG_02218	FGSG_13875	FGSG_10125
FGSG_08896	FGSG_02523	FGSG_05177	FGSG_00236	FGSG_11652	FGSG_03881	FGSG_02160	FGSG_03292	FGSG_08816	FGSG_08896
FGSG_12179	FGSG_07291	FGSG_13704	FGSG_16335	FGSG_09347	FGSG_03965	FGSG_04092	FGSG_15569	FGSG_01859	FGSG_12179
FGSG_13947	FGSG_13689	FGSG_12151	FGSG_00118	FGSG_15694	FGSG_05829	FGSG_03054	FGSG_03230	FGSG_03147	FGSG_13947
FGSG_13910	FGSG_11855	FGSG_04490	FGSG_02679	FGSG_04913	FGSG_12254	FGSG_04872	FGSG_13779	FGSG_11032	FGSG_13910
FGSG_01158	FGSG_08880	FGSG_07443	FGSG_12505	FGSG_08207	FGSG_04901	FGSG_03454	FGSG_06609	FGSG_15700	FGSG_01158
FGSG_08122	FGSG_16151	FGSG_06021	FGSG_01727	FGSG_16342	FGSG_15407	FGSG_17554	FGSG_07207	FGSG_15355	FGSG_08122
FGSG_07026	FGSG_08768	FGSG_02814	FGSG_11123	FGSG_16301	FGSG_16064	FGSG_10126	FGSG_09141	FGSG_15577	FGSG_07026
FGSG_09545	FGSG_04583	FGSG_05605	FGSG_01745	FGSG_13996	FGSG_13097	FGSG_15864	FGSG_03984	FGSG_03714	FGSG_09545
FGSG_10303	FGSG_10264	FGSG_12760	FGSG_06913	FGSG_15690	FGSG_17087	FGSG_10595	FGSG_07640	FGSG_01650	FGSG_10303
FGSG_07291	FGSG_10212	FGSG_09286	FGSG_11417	FGSG_11391	FGSG_04763	FGSG_03002	FGSG_03922	FGSG_05368	FGSG_07291
FGSG_09036	FGSG_01955	FGSG_05757	FGSG_16057	FGSG_02020	FGSG_12518	FGSG_10326	FGSG_11420	FGSG_03681	FGSG_09036
FGSG_15273	FGSG_10735	FGSG_01956	FGSG_04743	FGSG_09175	FGSG_05680	FGSG_04217	FGSG_06528	FGSG_12616	FGSG_15273
FGSG_07988	FGSG_12207	FGSG_04476	FGSG_01802	FGSG_02360	FGSG_13068	FGSG_02069	FGSG_01785	FGSG_11778	FGSG_07988
FGSG_01955	FGSG_09727	FGSG_01021	FGSG_17507	FGSG_03486	FGSG_16308	FGSG_11348	FGSG_06599	FGSG_16191	FGSG_01955
FGSG_00845	FGSG_00310	FGSG_06020	FGSG_06995	FGSG_08221	FGSG_10442	FGSG_17326	FGSG_03898	FGSG_15365	FGSG_00845
FGSG_00838	FGSG_01267	FGSG_07775	FGSG_03916	FGSG_13243	FGSG_05679	FGSG_13834	FGSG_03150	FGSG_08284	FGSG_00838
FGSG_15000	FGSG_10805	FGSG_00385	FGSG_03923	FGSG_09151	FGSG_16868	FGSG_03647	FGSG_06551	FGSG_01651	FGSG_15000
FGSG_00634	FGSG_00917	FGSG_10368	FGSG_15447	FGSG_11494	FGSG_02754	FGSG_16066	FGSG_02146	FGSG_16265	FGSG_00634
FGSG_02077	FGSG_10845	FGSG_00310	FGSG_15092	FGSG_10432	FGSG_01513	FGSG_08014	FGSG_02691	FGSG_15382	FGSG_02077
FGSG_01509	FGSG_10246	FGSG_00798	FGSG_11550	FGSG_17622	FGSG_12769	FGSG_06545	FGSG_05160	FGSG_15334	FGSG_01509
FGSG_08676	FGSG_10179	FGSG_12179	FGSG_02264	FGSG_12132	FGSG_15098	FGSG_00885	FGSG_12571	FGSG_15970	FGSG_08676
FGSG_11944	FGSG_12028	FGSG_08880	FGSG_11028	FGSG_12120	FGSG_09677	FGSG_11315	FGSG_13167	FGSG_09177	FGSG_11944
FGSG_09260	FGSG_13378	FGSG_01278	FGSG_12514	FGSG_10612	FGSG_10495	FGSG_04967	FGSG_04057	FGSG_07887	FGSG_09260
FGSG_12151	FGSG_05348	FGSG_10181	FGSG_09112	FGSG_07744	FGSG_11766	FGSG_02486	FGSG_03744	FGSG_00262	FGSG_12151
FGSG_08871	FGSG_15040	FGSG_08737	FGSG_16872	FGSG_00220	FGSG_12752	FGSG_00453	FGSG_11407	FGSG_04188	FGSG_08871
FGSG_07856	FGSG_06924	FGSG_10598	FGSG_12312	FGSG_01988	FGSG_11017	FGSG_11443	FGSG_16401	FGSG_04784	FGSG_07856
FGSG_09870	FGSG_10135	FGSG_11064	FGSG_11424	FGSG_10395	FGSG_11166	FGSG_03457	FGSG_02281	FGSG_05706	FGSG_09870
FGSG_08979	FGSG_01516	FGSG_10305	FGSG_15212	FGSG_16889	FGSG_16710	FGSG_05660	FGSG_03149	FGSG_08214	FGSG_08979
FGSG_00631	FGSG_08076	FGSG_03894	FGSG_02171	FGSG_03815	FGSG_12868	FGSG_16634	FGSG_02165	FGSG_07918	FGSG_00631
FGSG_06587	FGSG_06268	FGSG_01891	FGSG_06734	FGSG_07662	FGSG_12141	FGSG_17678	FGSG_07483	FGSG_08368	FGSG_06587
FGSG_11757	FGSG_11205	FGSG_06692	FGSG_03023	FGSG_16560	FGSG_11379	FGSG_02615	FGSG_16211	FGSG_02927	FGSG_11757
FGSG_06268	FGSG_08896	FGSG_04826	FGSG_16565	FGSG_03768	FGSG_05010	FGSG_05919	FGSG_12675	FGSG_15488	FGSG_06268
FGSG_10212	FGSG_09825	FGSG_06270	FGSG_16222	FGSG_11378	FGSG_13238	FGSG_17637	FGSG_03288	FGSG_02282	FGSG_10212
FGSG_02097	FGSG_05361	FGSG_13057	FGSG_15068	FGSG_11985	FGSG_16062	FGSG_01829	FGSG_11457	FGSG_03656	FGSG_02097
FGSG_02503	FGSG_04136	FGSG_01014	FGSG_02914	FGSG_02997	FGSG_12611	FGSG_11411	FGSG_17655	FGSG_13936	FGSG_02503
FGSG_10805	FGSG_02493	FGSG_00395	FGSG_08652	FGSG_09095	FGSG_02759	FGSG_03905	FGSG_02278	FGSG_09054	FGSG_10805
FGSG_06289	FGSG_03715	FGSG_10854	FGSG_12960	FGSG_08222	FGSG_07709	FGSG_03567	FGSG_16853	FGSG_03291	FGSG_06289
FGSG_05797	FGSG_15661	FGSG_09036	FGSG_13077	FGSG_13977	FGSG_00782	FGSG_03969	FGSG_04614	FGSG_17410	FGSG_05797
FGSG_02099	FGSG_00523	FGSG_02022	FGSG_13734	FGSG_16887	FGSG_04459	FGSG_01607	FGSG_12548	FGSG_02941	FGSG_02099
FGSG_08721	FGSG_13128	FGSG_00492	FGSG_00030	FGSG_02159	FGSG_13251	FGSG_08062	FGSG_04943	FGSG_15298	FGSG_08721
FGSG_05491	FGSG_07048	FGSG_10735	FGSG_02194	FGSG_04374	FGSG_11670	FGSG_15918	FGSG_10554	FGSG_12111	FGSG_05491
FGSG_16151	FGSG_15259	FGSG_01346	FGSG_16875	FGSG_01126	FGSG_12281	FGSG_10411	FGSG_01755	FGSG_06234	FGSG_16151
FGSG_00802	FGSG_10855	FGSG_06719	FGSG_04621	FGSG_10611	FGSG_15493	FGSG_05882	FGSG_10450	FGSG_09154	FGSG_00802
FGSG_11064	FGSG_10125	FGSG_02903	FGSG_05577	FGSG_01679	FGSG_10576	FGSG_17465	FGSG_12401	FGSG_15067	FGSG_11064
FGSG_02542	FGSG_07558	FGSG_01504	FGSG_03064	FGSG_13872	FGSG_08240	FGSG_00165	FGSG_03456	FGSG_02037	FGSG_02542
FGSG_07465	FGSG_08737	FGSG_16281	FGSG_16254	FGSG_12619	FGSG_13592	FGSG_03914	FGSG_00788	FGSG_10948	FGSG_07465
FGSG_00429	FGSG_07465	FGSG_02770	FGSG_11327	FGSG_11111	FGSG_13686	FGSG_17076	FGSG_13383	FGSG_15571	FGSG_00429
FGSG_09286	FGSG_07856	FGSG_10245	FGSG_05441	FGSG_17167	FGSG_11436	FGSG_12001	FGSG_03414	FGSG_07650	FGSG_09286
FGSG_10179	FGSG_10224	FGSG_04126	FGSG_11394	FGSG_04813	FGSG_05155	FGSG_15612	FGSG_08081	FGSG_13408	FGSG_10179
FGSG_09066	FGSG_06188	FGSG_05999	FGSG_03066	FGSG_00014	FGSG_12057	FGSG_07491	FGSG_02913	FGSG_03693	FGSG_09066
FGSG_11855	FGSG_08477	FGSG_00523	FGSG_01635	FGSG_03514	FGSG_06141	FGSG_06463	FGSG_11272	FGSG_06261	FGSG_11855
FGSG_08880	FGSG_03628	FGSG_09974	FGSG_04358	FGSG_12667	FGSG_11684	FGSG_07375	FGSG_16663	FGSG_15415	FGSG_08880
FGSG_07220	FGSG_15610	FGSG_10549	FGSG_04604	FGSG_17449	FGSG_09372	FGSG_11169	FGSG_02377	FGSG_15510	FGSG_07220
FGSG_06019	FGSG_00671	FGSG_05972	FGSG_03495	FGSG_17371	FGSG_16392	FGSG_01579	FGSG_07023	FGSG_12949	FGSG_06019
FGSG_06207	FGSG_08011	FGSG_00415	FGSG_06925	FGSG_16430	FGSG_10288	FGSG_02131	FGSG_07592	FGSG_15087	FGSG_06207
FGSG_00979	FGSG_10543	FGSG_02325	FGSG_16221	FGSG_11103	FGSG_12681	FGSG_11037	FGSG_00219	FGSG_16224	FGSG_00979
FGSG_10305	FGSG_13057	FGSG_01594	FGSG_09973	FGSG_04524	FGSG_01005	FGSG_03645	FGSG_03798	FGSG_03579	FGSG_10305
FGSG_01871	FGSG_08676	FGSG_04137	FGSG_07761	FGSG_11377	FGSG_03890	FGSG_13387	FGSG_08372	FGSG_15421	FGSG_01871
FGSG_05972	FGSG_06931	FGSG_05064	FGSG_04432	FGSG_02644	FGSG_15696	FGSG_15371	FGSG_03834	FGSG_00513	FGSG_05972
FGSG_09667	FGSG_01238	FGSG_07919	FGSG_11552	FGSG_09441	FGSG_00080	FGSG_02251	FGSG_05574	FGSG_17427	FGSG_09667
FGSG_08478	FGSG_10513	FGSG_08359	FGSG_06899	FGSG_16205	FGSG_15891	FGSG_06676	FGSG_11250	FGSG_15081	FGSG_08478
FGSG_08714	FGSG_09267	FGSG_15040	FGSG_12316	FGSG_17162	FGSG_03162	FGSG_05712	FGSG_03934	FGSG_16799	FGSG_08714
FGSG_13704	FGSG_08601	FGSG_04149	FGSG_13445	FGSG_12212	FGSG_13916	FGSG_02076	FGSG_03504	FGSG_04225	FGSG_13704
FGSG_00523	FGSG_09545	FGSG_09493	FGSG_02680	FGSG_07794	FGSG_17575	FGSG_06398	FGSG_10433	FGSG_12996	FGSG_00523
FGSG_16993	FGSG_09036	FGSG_13128	FGSG_09336	FGSG_07993	FGSG_01186	FGSG_01590	FGSG_15483	FGSG_15060	FGSG_16993
FGSG_10051	FGSG_03662	FGSG_08895	FGSG_16929	FGSG_08795	FGSG_03025	FGSG_03772	FGSG_15193	FGSG_07633	FGSG_10051
FGSG_02523	FGSG_01425	FGSG_15903	FGSG_08093	FGSG_01751	FGSG_15607	FGSG_16309	FGSG_09324	FGSG_03044	FGSG_02523
FGSG_02653	FGSG_10305	FGSG_03537	FGSG_15509	FGSG_11509	FGSG_02904	FGSG_10561	FGSG_05798	FGSG_15117	FGSG_02653
FGSG_00492	FGSG_00845	FGSG_07527	FGSG_04426	FGSG_16884	FGSG_05705	FGSG_17662	FGSG_03372	FGSG_16410	FGSG_00492
FGSG_06719	FGSG_01891	FGSG_13521	FGSG_17097	FGSG_17059	FGSG_09086	FGSG_09826	FGSG_15620	FGSG_06824	FGSG_06719
FGSG_07907	FGSG_09866	FGSG_02523	FGSG_04969	FGSG_05352	FGSG_02908	FGSG_02206	FGSG_10659	FGSG_15332	FGSG_07907
FGSG_08477	FGSG_00634	FGSG_09586	FGSG_06618	FGSG_05752	FGSG_15684	FGSG_04240	FGSG_03516	FGSG_16435	FGSG_08477
FGSG_01695	FGSG_05064	FGSG_09545	FGSG_02986	FGSG_03731	FGSG_15290	FGSG_03114	FGSG_10678	FGSG_07572	FGSG_01695
FGSG_12760	FGSG_01016	FGSG_05640	FGSG_12993	FGSG_02314	FGSG_07508	FGSG_08022	FGSG_17521	FGSG_04819	FGSG_12760
FGSG_04071	FGSG_00429	FGSG_01955	FGSG_13557	FGSG_16324	FGSG_04444	FGSG_11648	FGSG_17091	FGSG_16905	FGSG_04071
FGSG_10264	FGSG_00062	FGSG_03296	FGSG_13983	FGSG_02185	FGSG_06136	FGSG_04658	FGSG_13450	FGSG_02910	FGSG_10264
FGSG_07807	FGSG_06019	FGSG_07480	FGSG_08414	FGSG_04563	FGSG_04789	FGSG_02358	FGSG_17159	FGSG_10279	FGSG_07807
FGSG_10135	FGSG_02542	FGSG_10974	FGSG_07636	FGSG_11366	FGSG_00052	FGSG_04305	FGSG_15998	FGSG_03447	FGSG_10135
FGSG_02588	FGSG_01509	FGSG_04400	FGSG_01192	FGSG_04565	FGSG_06148	FGSG_11038	FGSG_13020	FGSG_17664	FGSG_02588
FGSG_03180	FGSG_01838	FGSG_07335	FGSG_05071	FGSG_03612	FGSG_15793	FGSG_13054	FGSG_12365	FGSG_15728	FGSG_03180
FGSG_16556	FGSG_06827	FGSG_03180	FGSG_11605	FGSG_15625	FGSG_02419	FGSG_09045	FGSG_00140	FGSG_08610	FGSG_16556
FGSG_01014	FGSG_10542	FGSG_03543	FGSG_03944	FGSG_01799	FGSG_13477	FGSG_15148	FGSG_03838	FGSG_12732	FGSG_01014
FGSG_09690	FGSG_06891	FGSG_10733	FGSG_17220	FGSG_00599	FGSG_03411	FGSG_11049	FGSG_02161	FGSG_15400	FGSG_09690
FGSG_10740	FGSG_09870	FGSG_06392	FGSG_00593	FGSG_15660	FGSG_10913	FGSG_04035	FGSG_11732	FGSG_15992	FGSG_10740
FGSG_01425	FGSG_03445	FGSG_13341	FGSG_05968	FGSG_12335	FGSG_07972	FGSG_03936	FGSG_08596	FGSG_17551	FGSG_01425
FGSG_07335	FGSG_08049	FGSG_01267	FGSG_08344	FGSG_11163	FGSG_10441	FGSG_07772	FGSG_04836	FGSG_04977	FGSG_07335
FGSG_06658	FGSG_07443	FGSG_07419	FGSG_06976	FGSG_04013	FGSG_15029	FGSG_16792	FGSG_17540	FGSG_05521	FGSG_06658
FGSG_07913	FGSG_01014	FGSG_07298	FGSG_16681	FGSG_13278	FGSG_10225	FGSG_02070	FGSG_06160	FGSG_09068	FGSG_07913
FGSG_16719	FGSG_03586	FGSG_16719	FGSG_12812	FGSG_00114	FGSG_10599	FGSG_16601	FGSG_13176	FGSG_09153	FGSG_16719
FGSG_13341	FGSG_06466	FGSG_07220	FGSG_01685	FGSG_16296	FGSG_15121	FGSG_07209	FGSG_07598	FGSG_16963	FGSG_13341
FGSG_00415	FGSG_05972	FGSG_04735	FGSG_17004	FGSG_01578	FGSG_15545	FGSG_03272	FGSG_02346	FGSG_15149	FGSG_00415
FGSG_10010	FGSG_09719	FGSG_01838	FGSG_13368	FGSG_12815	FGSG_12094	FGSG_04746	FGSG_12916	FGSG_15059	FGSG_10010
FGSG_06267	FGSG_06587	FGSG_10397	FGSG_10480	FGSG_11635	FGSG_16920	FGSG_17230	FGSG_04421	FGSG_06329	FGSG_06267
FGSG_02473	FGSG_02503	FGSG_05493	FGSG_07665	FGSG_15958	FGSG_16867	FGSG_02935	FGSG_00394	FGSG_04937	FGSG_02473
FGSG_03385	FGSG_06922	FGSG_01081	FGSG_08855	FGSG_16372	FGSG_15769	FGSG_16640	FGSG_12368	FGSG_16197	FGSG_03385
FGSG_02560	FGSG_07988	FGSG_01154	FGSG_01451	FGSG_08017	FGSG_03283	FGSG_16314	FGSG_13359	FGSG_11498	FGSG_02560
FGSG_00059	FGSG_13871	FGSG_07292	FGSG_05092	FGSG_15416	FGSG_12322	FGSG_17621	FGSG_06537	FGSG_04216	FGSG_00059
FGSG_04826	FGSG_11944	FGSG_02327	FGSG_11026	FGSG_03849	FGSG_01148	FGSG_15709	FGSG_09364	FGSG_13323	FGSG_04826
FGSG_08178	FGSG_09690	FGSG_00536	FGSG_12315	FGSG_03738	FGSG_00345	FGSG_10183	FGSG_04354	FGSG_00051	FGSG_12250
FGSG_12250	FGSG_00806	FGSG_07291	FGSG_05061	FGSG_11987	FGSG_17431	FGSG_09821	FGSG_08082	FGSG_01982	FGSG_08560
FGSG_08560	FGSG_10019	FGSG_09906	FGSG_01734	FGSG_02155	FGSG_03559	FGSG_03954	FGSG_04499	FGSG_11690	FGSG_05433
FGSG_05433	FGSG_08335	FGSG_01897	FGSG_06312	FGSG_16506	FGSG_13260	FGSG_11114	FGSG_13529	FGSG_02844	FGSG_08737
FGSG_08737	FGSG_00802	FGSG_02978	FGSG_03186	FGSG_15884	FGSG_02208	FGSG_07080	FGSG_03341	FGSG_07708	FGSG_07443
FGSG_07443	FGSG_13411	FGSG_00429	FGSG_01546	FGSG_16142	FGSG_06522	FGSG_00062	FGSG_15710	FGSG_02882	FGSG_10089
FGSG_10089	FGSG_06127	FGSG_01179	FGSG_12265	FGSG_11234	FGSG_17366	FGSG_11651	FGSG_04436	FGSG_03098	FGSG_11164
FGSG_11164	FGSG_00631	FGSG_10496	FGSG_12910	FGSG_03650	FGSG_03225	FGSG_05716	FGSG_16260	FGSG_13126	FGSG_02541
FGSG_02541	FGSG_08714	FGSG_03991	FGSG_10413	FGSG_10101	FGSG_13042	FGSG_13049	FGSG_11721	FGSG_01760	FGSG_02022
FGSG_02022	FGSG_02099	FGSG_10177	FGSG_03299	FGSG_17117	FGSG_03226	FGSG_03646	FGSG_08001	FGSG_17674	FGSG_10974
FGSG_10974	FGSG_13330	FGSG_10246	FGSG_12054	FGSG_16103	FGSG_12097	FGSG_01532	FGSG_12890	FGSG_08590	FGSG_01591
FGSG_01591	FGSG_01871	FGSG_13717	FGSG_15617	FGSG_08119	FGSG_03137	FGSG_03930	FGSG_16391	FGSG_01668	FGSG_10513
FGSG_10513	FGSG_02653	FGSG_08480	FGSG_08066	FGSG_04537	FGSG_05338	FGSG_11822	FGSG_11193	FGSG_16355	FGSG_13057
FGSG_13057	FGSG_09889	FGSG_02473	FGSG_15354	FGSG_05824	FGSG_12446	FGSG_01261	FGSG_08917	FGSG_12687	FGSG_00385
FGSG_00385	FGSG_12044	FGSG_03017	FGSG_11381	FGSG_01780	FGSG_07852	FGSG_17459	FGSG_13272	FGSG_13302	FGSG_10150
FGSG_10150	FGSG_16556	FGSG_10755	FGSG_03177	FGSG_04695	FGSG_04442	FGSG_02169	FGSG_13829	FGSG_17010	FGSG_03565
FGSG_03565	FGSG_07919	FGSG_09719	FGSG_09358	FGSG_01678	FGSG_07236	FGSG_07551	FGSG_06985	FGSG_06968	FGSG_15448
FGSG_15448	FGSG_06010	FGSG_13869	FGSG_04818	FGSG_02896	FGSG_15349	FGSG_04008	FGSG_12541	FGSG_11151	FGSG_04741
FGSG_04741	FGSG_09277	FGSG_08561	FGSG_03711	FGSG_15938	FGSG_17569	FGSG_03831	FGSG_08164	FGSG_17329	FGSG_06245
FGSG_06245	FGSG_13301	FGSG_04458	FGSG_03332	FGSG_02266	FGSG_13629	FGSG_09478	FGSG_04022	FGSG_10493	FGSG_02014
FGSG_02014	FGSG_12760	FGSG_02326	FGSG_15794	FGSG_15781	FGSG_13201	FGSG_04970	FGSG_12935	FGSG_06514	FGSG_08601
FGSG_08601	FGSG_12250	FGSG_13301	FGSG_12038	FGSG_16097	FGSG_13067	FGSG_02970	FGSG_15567	FGSG_15440	FGSG_07488
FGSG_07488	FGSG_09667	FGSG_00838	FGSG_15303	FGSG_03570	FGSG_02102	FGSG_05552	FGSG_04227	FGSG_04630	FGSG_13301
FGSG_13301	FGSG_15000	FGSG_06207	FGSG_01796	FGSG_04765	FGSG_03241	FGSG_12461	FGSG_07509	FGSG_09707	FGSG_04312
FGSG_04312	FGSG_16993	FGSG_01425	FGSG_03837	FGSG_07318	FGSG_12333	FGSG_07753	FGSG_02428	FGSG_13332	FGSG_10001
FGSG_10001	FGSG_01798	FGSG_01315	FGSG_03839	FGSG_17096	FGSG_16858	FGSG_10506	FGSG_09222	FGSG_16130	FGSG_10224
FGSG_10224	FGSG_02255	FGSG_08659	FGSG_07781	FGSG_10618	FGSG_16220	FGSG_01139	FGSG_17149	FGSG_13926	FGSG_05928
FGSG_05928	FGSG_10854	FGSG_09950	FGSG_03545	FGSG_15564	FGSG_13724	FGSG_01861	FGSG_07589	FGSG_16190	FGSG_07419
FGSG_07419	FGSG_06289	FGSG_06697	FGSG_10971	FGSG_11667	FGSG_12255	FGSG_09351	FGSG_03752	FGSG_13191	FGSG_03715
FGSG_03715	FGSG_06392	FGSG_10845	FGSG_00541	FGSG_08146	FGSG_03964	FGSG_00068	FGSG_06119	FGSG_10919	FGSG_12292
FGSG_12292	FGSG_02473	FGSG_05797	FGSG_02064	FGSG_13519	FGSG_01384	FGSG_09211	FGSG_12871	FGSG_02938	FGSG_12955
FGSG_12955	FGSG_08721	FGSG_08448	FGSG_11687	FGSG_07696	FGSG_01816	FGSG_11154	FGSG_08923	FGSG_11770	FGSG_08562
FGSG_08562	FGSG_07335	FGSG_08172	FGSG_00426	FGSG_00124	FGSG_11581	FGSG_02847	FGSG_11755	FGSG_13927	FGSG_03632
FGSG_03632	FGSG_01118	FGSG_11741	FGSG_11266	FGSG_04738	FGSG_17196	FGSG_17497	FGSG_13382	FGSG_03678	FGSG_06127
FGSG_06127	FGSG_13341	FGSG_12044	FGSG_15566	FGSG_10547	FGSG_12470	FGSG_03334	FGSG_15784	FGSG_02115	FGSG_09719
FGSG_09719	FGSG_10089	FGSG_07528	FGSG_15830	FGSG_08091	FGSG_02642	FGSG_02033	FGSG_09145	FGSG_13476	FGSG_08530
FGSG_08530	FGSG_08359	FGSG_03518	FGSG_07663	FGSG_08144	FGSG_13063	FGSG_16576	FGSG_10747	FGSG_01538	FGSG_05046
FGSG_05046	FGSG_02560	FGSG_12250	FGSG_02293	FGSG_09350	FGSG_00227	FGSG_07921	FGSG_08651	FGSG_15591	FGSG_07186
FGSG_07186	FGSG_10772	FGSG_03829	FGSG_15390	FGSG_01631	FGSG_17365	FGSG_00067	FGSG_05692	FGSG_15533	FGSG_15040
FGSG_15040	FGSG_05186	FGSG_09690	FGSG_07755	FGSG_02257	FGSG_04863	FGSG_05936	FGSG_08032	FGSG_05569	FGSG_10784
FGSG_10784	FGSG_07527	FGSG_01118	FGSG_06083	FGSG_15397	FGSG_11508	FGSG_11528	FGSG_09259	FGSG_12528	FGSG_07211
FGSG_07211	FGSG_08427	FGSG_06245	FGSG_04433	FGSG_09483	FGSG_03679	FGSG_15893	FGSG_11405	FGSG_13672	FGSG_02770
FGSG_02770	FGSG_16869	FGSG_01322	FGSG_03631	FGSG_08824	FGSG_17430	FGSG_13720	FGSG_17015	FGSG_13950	FGSG_08365
FGSG_08365	FGSG_08478	FGSG_07830	FGSG_05821	FGSG_07754	FGSG_12345	FGSG_07765	FGSG_05006	FGSG_11747	FGSG_00471
FGSG_00471	FGSG_04207	FGSG_07907	FGSG_16313	FGSG_12133	FGSG_04409	FGSG_17641	FGSG_06230	FGSG_12797	FGSG_00496
FGSG_00496	FGSG_00060	FGSG_10179	FGSG_00858	FGSG_07843	FGSG_07579	FGSG_06046	FGSG_07888	FGSG_13308	FGSG_10241
FGSG_10241	FGSG_00838	FGSG_11944	FGSG_12034	FGSG_00015	FGSG_08705	FGSG_09883	FGSG_02343	FGSG_15623	FGSG_04400
FGSG_04400	FGSG_12232	FGSG_08620	FGSG_13684	FGSG_16173	FGSG_11561	FGSG_12086	FGSG_05591	FGSG_03174	FGSG_10293
FGSG_10293	FGSG_12456	FGSG_10873	FGSG_15939	FGSG_04619	FGSG_09569	FGSG_03306	FGSG_12323	FGSG_16621	FGSG_04975
FGSG_04975	FGSG_13952	FGSG_03992	FGSG_03614	FGSG_11999	FGSG_12956	FGSG_13930	FGSG_07860	FGSG_13656	FGSG_08888
FGSG_08888	FGSG_01462	FGSG_09955	FGSG_12615	FGSG_09146	FGSG_10290	FGSG_10937	FGSG_03562	FGSG_12820	FGSG_06875
FGSG_06875	FGSG_07130	FGSG_16186	FGSG_04417	FGSG_08092	FGSG_09646	FGSG_09728	FGSG_04529	FGSG_15572	FGSG_08723
FGSG_08723	FGSG_11909	FGSG_00049	FGSG_15324	FGSG_13045	FGSG_10605	FGSG_09142	FGSG_13426	FGSG_15414	FGSG_10177
FGSG_10177	FGSG_06878	FGSG_09667	FGSG_02953	FGSG_03654	FGSG_13384	FGSG_02392	FGSG_16055	FGSG_00965	FGSG_05543
FGSG_05543	FGSG_17405	FGSG_02097	FGSG_04734	FGSG_17364	FGSG_01076	FGSG_15586	FGSG_06321	FGSG_13095	FGSG_02322
FGSG_02322	FGSG_12764	FGSG_07925	FGSG_12842	FGSG_07628	FGSG_07584	FGSG_02288	FGSG_10914	FGSG_11383	FGSG_10831
FGSG_10831	FGSG_12179	FGSG_11409	FGSG_17508	FGSG_04360	FGSG_16837	FGSG_03598	FGSG_05129	FGSG_13591	FGSG_02273
FGSG_02273	FGSG_03991	FGSG_00043	FGSG_00005	FGSG_11244	FGSG_04422	FGSG_16921	FGSG_05184	FGSG_09479	FGSG_09489
FGSG_09489	FGSG_13931	FGSG_03529	FGSG_02104	FGSG_16411	FGSG_02313	FGSG_08021	FGSG_00072	FGSG_13683	FGSG_03126
FGSG_03126	FGSG_12056	FGSG_10825	FGSG_01319	FGSG_11986	FGSG_02151	FGSG_01603	FGSG_12704	FGSG_15330	FGSG_00554
FGSG_00554	FGSG_08480	FGSG_17034	FGSG_12698	FGSG_10569	FGSG_15686	FGSG_00989	FGSG_00427	FGSG_16561	FGSG_06697
FGSG_06697	FGSG_00663	FGSG_01409	FGSG_16927	FGSG_17104	FGSG_03276	FGSG_05742	FGSG_15135	FGSG_13147	FGSG_00921
FGSG_00921	FGSG_13849	FGSG_08530	FGSG_00784	FGSG_04089	FGSG_10665	FGSG_09884	FGSG_04866	FGSG_03557	FGSG_15824
FGSG_15824	FGSG_06207	FGSG_11619	FGSG_17487	FGSG_11988	FGSG_09388	FGSG_10672	FGSG_16895	FGSG_04793	FGSG_15875
FGSG_15875	FGSG_03554	FGSG_04741	FGSG_04455	FGSG_15966	FGSG_03664	FGSG_08985	FGSG_07597	FGSG_12481	FGSG_04074
FGSG_04074	FGSG_04037	FGSG_00979	FGSG_04138	FGSG_02130	FGSG_17631	FGSG_17372	FGSG_08131	FGSG_17579	FGSG_00898
FGSG_00898	FGSG_10177	FGSG_06702	FGSG_05913	FGSG_03035	FGSG_12177	FGSG_16363	FGSG_15199	FGSG_15579	FGSG_13689
FGSG_13689	FGSG_11737	FGSG_09005	FGSG_13522	FGSG_08264	FGSG_03789	FGSG_13516	FGSG_17118	FGSG_05272	FGSG_06668
FGSG_06668	FGSG_13697	FGSG_00048	FGSG_00032	FGSG_07531	FGSG_12378	FGSG_02871	FGSG_13624	FGSG_11840	FGSG_07919
FGSG_07919	FGSG_01767	FGSG_08743	FGSG_03345	FGSG_02136	FGSG_03485	FGSG_05834	FGSG_03220	FGSG_08201	FGSG_00373
FGSG_00373	FGSG_00059	FGSG_04037	FGSG_11337	FGSG_02147	FGSG_08616	FGSG_08925	FGSG_12469	FGSG_13478	FGSG_03585
FGSG_03585	FGSG_02588	FGSG_06267	FGSG_15880	FGSG_04587	FGSG_07504	FGSG_04704	FGSG_10437	FGSG_05056	FGSG_04288
FGSG_04288	FGSG_06697	FGSG_06931	FGSG_10525	FGSG_10597	FGSG_02955	FGSG_04214	FGSG_08054	FGSG_12020	FGSG_06082
FGSG_06082	FGSG_03300	FGSG_09489	FGSG_12162	FGSG_03819	FGSG_10328	FGSG_00061	FGSG_13756	FGSG_15808	FGSG_08480
FGSG_08480	FGSG_10010	FGSG_13194	FGSG_11818	FGSG_07982	FGSG_15383	FGSG_17314	FGSG_02270	FGSG_07846	FGSG_01912
FGSG_01912	FGSG_03126	FGSG_07048	FGSG_07046	FGSG_15472	FGSG_15337	FGSG_12081	FGSG_00049	FGSG_15243	FGSG_16176
FGSG_16176	FGSG_15399	FGSG_10513	FGSG_15802	FGSG_13526	FGSG_07502	FGSG_03343	FGSG_07410	FGSG_03453	FGSG_05564
FGSG_05564	FGSG_15856	FGSG_04176	FGSG_12171	FGSG_02118	FGSG_15078	FGSG_01809	FGSG_01712	FGSG_16292	FGSG_01891
FGSG_01891	FGSG_10589	FGSG_11233	FGSG_12778	FGSG_03463	FGSG_11995	FGSG_10483	FGSG_09354	FGSG_15626	FGSG_10549
FGSG_10549	FGSG_04400	FGSG_02661	FGSG_08064	FGSG_05076	FGSG_04375	FGSG_03801	FGSG_11343	FGSG_10786	FGSG_01008
FGSG_01008	FGSG_05757	FGSG_01016	FGSG_11839	FGSG_16631	FGSG_03097	FGSG_03942	FGSG_13487	FGSG_10625	FGSG_10235
FGSG_10235	FGSG_04126	FGSG_00709	FGSG_00594	FGSG_11147	FGSG_07667	FGSG_06399	FGSG_00043	FGSG_11061	FGSG_05175
FGSG_05175	FGSG_01409	FGSG_02653	FGSG_07550	FGSG_16108	FGSG_11308	FGSG_16623	FGSG_05771	FGSG_05450	FGSG_16768
FGSG_16768	FGSG_10319	FGSG_05564	FGSG_08083	FGSG_03099	FGSG_17665	FGSG_06444	FGSG_15388	FGSG_01868	FGSG_00556
FGSG_00556	FGSG_01008	FGSG_10831	FGSG_06650	FGSG_04931	FGSG_15072	FGSG_05802	FGSG_10889	FGSG_03703	FGSG_00900
FGSG_00900	FGSG_03624	FGSG_06924	FGSG_04629	FGSG_03342	FGSG_11260	FGSG_15460	FGSG_17505	FGSG_14003	FGSG_05186
FGSG_05186	FGSG_00392	FGSG_11939	FGSG_04347	FGSG_16074	FGSG_00102	FGSG_11339	FGSG_01614	FGSG_00456	FGSG_03991
FGSG_03991	FGSG_08655	FGSG_08676	FGSG_16270	FGSG_08139	FGSG_13659	FGSG_15788	FGSG_11554	FGSG_03363	FGSG_12044
FGSG_12044	FGSG_08739	FGSG_03336	FGSG_08999	FGSG_07757	FGSG_05650	FGSG_16669	FGSG_00048	FGSG_09115	FGSG_03535
FGSG_03535	FGSG_10132	FGSG_03534	FGSG_15071	FGSG_17477	FGSG_11543	FGSG_07692	FGSG_06807	FGSG_17411	FGSG_08677
FGSG_08677	FGSG_04239	FGSG_16755	FGSG_13787	FGSG_09367	FGSG_04379	FGSG_04613	FGSG_00053	FGSG_07081	FGSG_05064
FGSG_05064	FGSG_15903	FGSG_13000	FGSG_16332	FGSG_11158	FGSG_01054	FGSG_04966	FGSG_01595	FGSG_08909	FGSG_10132
FGSG_10132	FGSG_06130	FGSG_07678	FGSG_02874	FGSG_16111	FGSG_15151	FGSG_11367	FGSG_04828	FGSG_08469	FGSG_07425
FGSG_07425	FGSG_06267	FGSG_10281	FGSG_03279	FGSG_08267	FGSG_05651	FGSG_10365	FGSG_12358	FGSG_00521	FGSG_09933
FGSG_09933	FGSG_03795	FGSG_00059	FGSG_12440	FGSG_13762	FGSG_03587	FGSG_12458	FGSG_02950	FGSG_09763	FGSG_07908
FGSG_07908	FGSG_03569	FGSG_03565	FGSG_16352	FGSG_03927	FGSG_17444	FGSG_03451	FGSG_08661	FGSG_02039	FGSG_04917
FGSG_04917	FGSG_06245	FGSG_08888	FGSG_12349	FGSG_10399	FGSG_16672	FGSG_10668	FGSG_07422	FGSG_02259	FGSG_06702
FGSG_06702	FGSG_02225	FGSG_09639	FGSG_10004	FGSG_13813	FGSG_11501	FGSG_17019	FGSG_08200	FGSG_16881	FGSG_10854
FGSG_10854	FGSG_17034	FGSG_10293	FGSG_13065	FGSG_17401	FGSG_16282	FGSG_08912	FGSG_00218	FGSG_04144	FGSG_06841
FGSG_06841	FGSG_16834	FGSG_01241	FGSG_08080	FGSG_05945	FGSG_01759	FGSG_00783	FGSG_13362	FGSG_12508	FGSG_15610
FGSG_15610	FGSG_08493	FGSG_06019	FGSG_16657	FGSG_03261	FGSG_04652	FGSG_05238	FGSG_03933	FGSG_13361	FGSG_01099
FGSG_01099	FGSG_10831	FGSG_04136	FGSG_17170	FGSG_03883	FGSG_17455	FGSG_11864	FGSG_15962	FGSG_10174	FGSG_01422
FGSG_01422	FGSG_02097	FGSG_13412	FGSG_02341	FGSG_16844	FGSG_13908	FGSG_09085	FGSG_15282	FGSG_07980	FGSG_15019
FGSG_15019	FGSG_08979	FGSG_02321	FGSG_16570	FGSG_10601	FGSG_12150	FGSG_15778	FGSG_09553	FGSG_11257	FGSG_15903
FGSG_15903	FGSG_03969	FGSG_06830	FGSG_15435	FGSG_17485	FGSG_12096	FGSG_13438	FGSG_00683	FGSG_00895	FGSG_04037
FGSG_04037	FGSG_15019	FGSG_09842	FGSG_06592	FGSG_09287	FGSG_12062	FGSG_03366	FGSG_01894	FGSG_03686	FGSG_08493
FGSG_08493	FGSG_02541	FGSG_04312	FGSG_17221	FGSG_10588	FGSG_15116	FGSG_03784	FGSG_01003	FGSG_09102	FGSG_12267
FGSG_12267	FGSG_01099	FGSG_02503	FGSG_12653	FGSG_15053	FGSG_11139	FGSG_00060	FGSG_09557	FGSG_05214	FGSG_04824
FGSG_04824	FGSG_00415	FGSG_01224	FGSG_13753	FGSG_16549	FGSG_15523	FGSG_16622	FGSG_08623	FGSG_12147	FGSG_11619
FGSG_11619	FGSG_01322	FGSG_09260	FGSG_04244	FGSG_02248	FGSG_15377	FGSG_17245	FGSG_05859	FGSG_04539	FGSG_06847
FGSG_06847	FGSG_03157	FGSG_04558	FGSG_04689	FGSG_08152	FGSG_05334	FGSG_11850	FGSG_11291	FGSG_05078	FGSG_10905
FGSG_10905	FGSG_07072	FGSG_01591	FGSG_13290	FGSG_10540	FGSG_12304	FGSG_02059	FGSG_06782	FGSG_16179	FGSG_09586
FGSG_09586	FGSG_13000	FGSG_08896	FGSG_09168	FGSG_06129	FGSG_00144	FGSG_08295	FGSG_01149	FGSG_03243	FGSG_10735
FGSG_10735	FGSG_01591	FGSG_10784	FGSG_07521	FGSG_04912	FGSG_16106	FGSG_15965	FGSG_16572	FGSG_12722	FGSG_07160
FGSG_07160	FGSG_10001	FGSG_04155	FGSG_13696	FGSG_16529	FGSG_00422	FGSG_11468	FGSG_03370	FGSG_12707	FGSG_04583
FGSG_04583	FGSG_08246	FGSG_15824	FGSG_11783	FGSG_17067	FGSG_10378	FGSG_02678	FGSG_02611	FGSG_15408	FGSG_11047
FGSG_11047	FGSG_00471	FGSG_06922	FGSG_02654	FGSG_04921	FGSG_13413	FGSG_00272	FGSG_09510	FGSG_15238	FGSG_00536
FGSG_00536	FGSG_08560	FGSG_11467	FGSG_07605	FGSG_13277	FGSG_02368	FGSG_04431	FGSG_16274	FGSG_03282	FGSG_04126
FGSG_04126	FGSG_07186	FGSG_02493	FGSG_02920	FGSG_03832	FGSG_17705	FGSG_07529	FGSG_08055	FGSG_06142	FGSG_04283
FGSG_04283	FGSG_09586	FGSG_05615	FGSG_00569	FGSG_16864	FGSG_13230	FGSG_13997	FGSG_01108		FGSG_06184
FGSG_06184	FGSG_04312	FGSG_10922	FGSG_01517	FGSG_03908	FGSG_17425	FGSG_04447	FGSG_02973		FGSG_00192
FGSG_00192	FGSG_13717	FGSG_02014	FGSG_10638	FGSG_07544	FGSG_17026	FGSG_06445	FGSG_13098		FGSG_00190
FGSG_00190	FGSG_07824	FGSG_12267	FGSG_11122	FGSG_01582	FGSG_11317	FGSG_11195	FGSG_09819		FGSG_17681
FGSG_17681	FGSG_11619	FGSG_04315	FGSG_13178	FGSG_15074	FGSG_01813	FGSG_00487	FGSG_15340		FGSG_01118
FGSG_01118	FGSG_04826	FGSG_07478	FGSG_07661	FGSG_16436	FGSG_13965	FGSG_01484	FGSG_09695		FGSG_04315
FGSG_04315	FGSG_11564	FGSG_03335	FGSG_07899	FGSG_06610	FGSG_16386	FGSG_16877	FGSG_07112		FGSG_07896
FGSG_07896	FGSG_05543	FGSG_01528	FGSG_05528	FGSG_15197	FGSG_12884	FGSG_05889	FGSG_16866		FGSG_17034
FGSG_17034	FGSG_16969	FGSG_12955	FGSG_13678	FGSG_04647	FGSG_11758	FGSG_03599	FGSG_00960		FGSG_08655
FGSG_07671	FGSG_12267	FGSG_01872	FGSG_07448	FGSG_10953	FGSG_16077	FGSG_16843	FGSG_15697		FGSG_07298
FGSG_08655	FGSG_03632	FGSG_09403	FGSG_11335	FGSG_16907	FGSG_11011	FGSG_00116	FGSG_16528		FGSG_04176
FGSG_07298	FGSG_06692	FGSG_08023	FGSG_01691	FGSG_07847	FGSG_15420	FGSG_04801	FGSG_07894		FGSG_09471
FGSG_04176	FGSG_10825	FGSG_10782	FGSG_13488	FGSG_11371	FGSG_11321	FGSG_15128	FGSG_16039		FGSG_10512
FGSG_09471	FGSG_00921	FGSG_06039	FGSG_03301	FGSG_08073	FGSG_07198	FGSG_09370	FGSG_11162		FGSG_10782
FGSG_10512	FGSG_09210	FGSG_12456	FGSG_00678	FGSG_03800	FGSG_15822	FGSG_11426	FGSG_01012		FGSG_03804
FGSG_10782	FGSG_05606	FGSG_00192	FGSG_10221	FGSG_01989	FGSG_16492	FGSG_01060	FGSG_15682		FGSG_09574
FGSG_03804	FGSG_04071	FGSG_08493	FGSG_00432	FGSG_03049	FGSG_13256	FGSG_17068	FGSG_05624		FGSG_11398
FGSG_09574	FGSG_15824	FGSG_06847	FGSG_13395	FGSG_06192	FGSG_13015	FGSG_04200	FGSG_01545		FGSG_03295
FGSG_11398	FGSG_13296	FGSG_07074	FGSG_12262	FGSG_13416	FGSG_11802	FGSG_01800	FGSG_12597		FGSG_13560
FGSG_03295	FGSG_02504	FGSG_09870	FGSG_15836	FGSG_15177	FGSG_17156	FGSG_07606	FGSG_12741		FGSG_06392
FGSG_13560	FGSG_06452	FGSG_03412	FGSG_04036	FGSG_16417	FGSG_09127	FGSG_17446	FGSG_03294		FGSG_01322
FGSG_06392	FGSG_05846	FGSG_01974	FGSG_09470	FGSG_15687	FGSG_16337	FGSG_10472	FGSG_03477		FGSG_07587
FGSG_01322	FGSG_01026	FGSG_13514	FGSG_16376	FGSG_15255	FGSG_13951	FGSG_13200	FGSG_17260		FGSG_02504
FGSG_07587	FGSG_17037	FGSG_02281	FGSG_04968	FGSG_02834	FGSG_11704	FGSG_04063	FGSG_12415		FGSG_10363
FGSG_02504	FGSG_10235	FGSG_01912	FGSG_06110	FGSG_10474	FGSG_01609	FGSG_17456	FGSG_16579		FGSG_00171
FGSG_10363	FGSG_01523	FGSG_01516	FGSG_10523	FGSG_09129	FGSG_06498	FGSG_01205	FGSG_07773		FGSG_02461
FGSG_00171	FGSG_09170	FGSG_15650	FGSG_06698	FGSG_06235	FGSG_15118	FGSG_07350	FGSG_05776		FGSG_07588
FGSG_02461	FGSG_03079	FGSG_04546	FGSG_07267	FGSG_08025	FGSG_00354	FGSG_11048	FGSG_08329		FGSG_01241
FGSG_07588	FGSG_05847	FGSG_01099	FGSG_01777	FGSG_07614	FGSG_04792	FGSG_15713	FGSG_17152		FGSG_08566
FGSG_01241	FGSG_10488	FGSG_15661	FGSG_01140	FGSG_15964	FGSG_16671	FGSG_00828	FGSG_03396		FGSG_08291
FGSG_08566	FGSG_05564	FGSG_00471	FGSG_12876	FGSG_15209	FGSG_07669	FGSG_03316	FGSG_12245		FGSG_00757
FGSG_08291	FGSG_04288	FGSG_00671	FGSG_03813	FGSG_01748	FGSG_17075	FGSG_12390	FGSG_00361		FGSG_03017
FGSG_00757	FGSG_04155	FGSG_02504	FGSG_11566	FGSG_07615	FGSG_07914	FGSG_17134	FGSG_07258		FGSG_01346
FGSG_03017	FGSG_16093	FGSG_06184	FGSG_15847	FGSG_15088	FGSG_05545	FGSG_09210	FGSG_13142		FGSG_12607
FGSG_01346	FGSG_04182	FGSG_15000		FGSG_03859	FGSG_09389	FGSG_06271	FGSG_10660		FGSG_05757
FGSG_12607	FGSG_12503	FGSG_03540		FGSG_07723	FGSG_08647	FGSG_03865	FGSG_06829		FGSG_09842
FGSG_05757	FGSG_05943	FGSG_08655		FGSG_01529	FGSG_04957	FGSG_00876	FGSG_05452		FGSG_10200
FGSG_09842	FGSG_12955	FGSG_00631		FGSG_02152	FGSG_11055	FGSG_16024	FGSG_15362		FGSG_07248
FGSG_10200	FGSG_15279	FGSG_00845		FGSG_07808	FGSG_13918	FGSG_08618	FGSG_15963		FGSG_06936
FGSG_07248	FGSG_10592	FGSG_10810		FGSG_03739	FGSG_12487	FGSG_06594	FGSG_09645		FGSG_08700
FGSG_06936	FGSG_15931	FGSG_01008		FGSG_03728	FGSG_12017	FGSG_00312	FGSG_17237		FGSG_00743
FGSG_08700	FGSG_02814	FGSG_09650		FGSG_16073	FGSG_17048	FGSG_05799	FGSG_03151		FGSG_16883
FGSG_00743	FGSG_10200	FGSG_08979		FGSG_16071	FGSG_08150	FGSG_08142	FGSG_05002		FGSG_08847
FGSG_16883	FGSG_00536	FGSG_01509		FGSG_13456	FGSG_03913	FGSG_15957	FGSG_16290		FGSG_06895
FGSG_08847	FGSG_01872	FGSG_09042		FGSG_02409	FGSG_12253	FGSG_10434	FGSG_12562		FGSG_01672
FGSG_06895	FGSG_05026	FGSG_07439		FGSG_15224	FGSG_15568	FGSG_03154	FGSG_08821		FGSG_12181
FGSG_01672	FGSG_07419	FGSG_12181		FGSG_04870	FGSG_04215	FGSG_16878	FGSG_02449		FGSG_15451
FGSG_12181	FGSG_08530	FGSG_07488		FGSG_09173	FGSG_16431	FGSG_08797	FGSG_03431		FGSG_07527
FGSG_03460	FGSG_03946	FGSG_02323		FGSG_01787	FGSG_13293	FGSG_09268	FGSG_16922		FGSG_01381
FGSG_15451	FGSG_11304	FGSG_16728		FGSG_03794	FGSG_12073	FGSG_04677	FGSG_09527		FGSG_16627
FGSG_07527	FGSG_05046	FGSG_01238		FGSG_09143	FGSG_04233	FGSG_11196	FGSG_03754		FGSG_08537
FGSG_01381	FGSG_01877	FGSG_01158		FGSG_04871	FGSG_16546	FGSG_09191	FGSG_17644		FGSG_00071
FGSG_16627	FGSG_11927	FGSG_06483		FGSG_03925	FGSG_12299	FGSG_05720	FGSG_05905		FGSG_08172
FGSG_08537	FGSG_06841	FGSG_02600		FGSG_04635	FGSG_12426	FGSG_02426	FGSG_07522		FGSG_00863
FGSG_00071	FGSG_07298	FGSG_06875		FGSG_03519	FGSG_12067	FGSG_10470	FGSG_16175		FGSG_07275
FGSG_08172	FGSG_11936	FGSG_04975		FGSG_13216	FGSG_01772	FGSG_11145	FGSG_06722		FGSG_10488
FGSG_00863	FGSG_08624	FGSG_02542		FGSG_15792	FGSG_15055	FGSG_03783	FGSG_04170		FGSG_10598
FGSG_07275	FGSG_12659	FGSG_03430		FGSG_11723	FGSG_16497	FGSG_17397	FGSG_17315		FGSG_00717
FGSG_10488	FGSG_08172	FGSG_12028		FGSG_17151	FGSG_16424	FGSG_05062	FGSG_05415		FGSG_01111
FGSG_10598	FGSG_06875	FGSG_00577		FGSG_12000	FGSG_15619	FGSG_11400	FGSG_16148		FGSG_06922
FGSG_00717	FGSG_08888	FGSG_09990		FGSG_11630	FGSG_12190	FGSG_12201	FGSG_15801		FGSG_01247
FGSG_01111	FGSG_04315	FGSG_03211		FGSG_06381	FGSG_13705	FGSG_02290	FGSG_05835		FGSG_05177
FGSG_06922	FGSG_08566	FGSG_02077		FGSG_04749	FGSG_11521	FGSG_03034	FGSG_16223		FGSG_15916
FGSG_01247	FGSG_07404	FGSG_09587		FGSG_05811	FGSG_09681	FGSG_09052	FGSG_06515		FGSG_12207
FGSG_05177	FGSG_16768	FGSG_08275		FGSG_13440	FGSG_08194	FGSG_09368	FGSG_16056		FGSG_08427
FGSG_15916	FGSG_05433	FGSG_06827		FGSG_16180	FGSG_08580	FGSG_15895	FGSG_10318		FGSG_16186
FGSG_12207	FGSG_03264	FGSG_11285		FGSG_03057	FGSG_13932	FGSG_09521	FGSG_05086		FGSG_10064
FGSG_08427	FGSG_08238	FGSG_07651		FGSG_17105	FGSG_09279	FGSG_02632	FGSG_08569		FGSG_04000
FGSG_16186	FGSG_04181	FGSG_08566		FGSG_08113	FGSG_16361	FGSG_16141	FGSG_04322		FGSG_09155
FGSG_10064	FGSG_06315	FGSG_16993		FGSG_11316	FGSG_13945	FGSG_16228	FGSG_17383		FGSG_06480
FGSG_04000	FGSG_05177	FGSG_03379		FGSG_12491	FGSG_12803	FGSG_13608	FGSG_03856		FGSG_17247
FGSG_09155	FGSG_15863	FGSG_00802		FGSG_13417	FGSG_07242	FGSG_06199	FGSG_13640		FGSG_10142
FGSG_06480	FGSG_02284	FGSG_01381		FGSG_03698	FGSG_17501	FGSG_11174	FGSG_16291		FGSG_06150
FGSG_17247	FGSG_11428	FGSG_09039		FGSG_11548	FGSG_03595	FGSG_08409	FGSG_03785		FGSG_04908
FGSG_10142	FGSG_13281	FGSG_15437		FGSG_06622	FGSG_16045	FGSG_13955	FGSG_10191		FGSG_06130
FGSG_06150	FGSG_01912	FGSG_09866		FGSG_16230	FGSG_12872	FGSG_15987	FGSG_13266		FGSG_03586
FGSG_04908	FGSG_09955	FGSG_08677		FGSG_16577	FGSG_11775	FGSG_10154	FGSG_08781		FGSG_01331
FGSG_06130	FGSG_10293	FGSG_00639		FGSG_16902	FGSG_15419	FGSG_13866	FGSG_01212		FGSG_12745
FGSG_03894	FGSG_03600	FGSG_16980		FGSG_03155	FGSG_03759	FGSG_09802	FGSG_07535		FGSG_02600
FGSG_03586	FGSG_10833	FGSG_02329		FGSG_07734	FGSG_04671	FGSG_04197	FGSG_15423		FGSG_07074
FGSG_01331	FGSG_06445	FGSG_07851		FGSG_12148	FGSG_05949	FGSG_05157	FGSG_16327		FGSG_04207
FGSG_12745	FGSG_03599	FGSG_10001		FGSG_11254	FGSG_09108	FGSG_04760	FGSG_04890		FGSG_01702
FGSG_02600	FGSG_09471	FGSG_02758		FGSG_15988	FGSG_10098	FGSG_07936	FGSG_01467		FGSG_05251
FGSG_07074	FGSG_09715	FGSG_04575		FGSG_08071	FGSG_12468	FGSG_13331	FGSG_02790		FGSG_05458
FGSG_04207	FGSG_04557	FGSG_00757		FGSG_12350	FGSG_10707		FGSG_08466		FGSG_04527
FGSG_01702	FGSG_08537	FGSG_06587		FGSG_15983	FGSG_12596		FGSG_07099		FGSG_00393
FGSG_05251	FGSG_10013	FGSG_00393		FGSG_12522	FGSG_17217		FGSG_11439		FGSG_01974
FGSG_05458	FGSG_06668	FGSG_06841		FGSG_03373	FGSG_03434		FGSG_00423		FGSG_09896
FGSG_04527	FGSG_12869	FGSG_07018		FGSG_02977	FGSG_15722		FGSG_00246		FGSG_00663
FGSG_00393	FGSG_04768	FGSG_02099		FGSG_07624	FGSG_11278		FGSG_03658		FGSG_07953
FGSG_01974	FGSG_02935	FGSG_10800		FGSG_16433	FGSG_15229		FGSG_01521		FGSG_12578
FGSG_09896	FGSG_01837	FGSG_06895		FGSG_15837	FGSG_01066		FGSG_07643		FGSG_04546
FGSG_00663	FGSG_02273	FGSG_00053		FGSG_08609	FGSG_15283		FGSG_11309		FGSG_06891
FGSG_07953	FGSG_13870	FGSG_09471		FGSG_16049	FGSG_03826		FGSG_11312		FGSG_02746
FGSG_12578	FGSG_06600	FGSG_01351		FGSG_08135	FGSG_07795		FGSG_05704		FGSG_06526
FGSG_04546	FGSG_13083	FGSG_08723		FGSG_02307	FGSG_05258		FGSG_09590		FGSG_07865
FGSG_06891	FGSG_10755	FGSG_08537		FGSG_15214	FGSG_02992		FGSG_09916		FGSG_09366
FGSG_02746	FGSG_09005	FGSG_17681		FGSG_13372	FGSG_03090		FGSG_13185		FGSG_09834
FGSG_06526	FGSG_09205	FGSG_04557		FGSG_04636	FGSG_03929		FGSG_11287		FGSG_05291
FGSG_07865	FGSG_15609	FGSG_12570		FGSG_15932	FGSG_16272		FGSG_04151		FGSG_02661
FGSG_09366	FGSG_02661	FGSG_07856		FGSG_12085	FGSG_10502		FGSG_16472		FGSG_00878
FGSG_09834	FGSG_02202	FGSG_15883		FGSG_00313	FGSG_13224		FGSG_02599		FGSG_03120
FGSG_05291	FGSG_00743	FGSG_08427		FGSG_04681	FGSG_04740		FGSG_07590		FGSG_07072
FGSG_02661	FGSG_08459	FGSG_01871		FGSG_04785	FGSG_15727		FGSG_09103		FGSG_09889
FGSG_11310	FGSG_12578	FGSG_00769		FGSG_07767	FGSG_16052		FGSG_10647		FGSG_05397
FGSG_00878	FGSG_08878	FGSG_00264		FGSG_00056	FGSG_03481		FGSG_10912		FGSG_04213
FGSG_03120	FGSG_04848	FGSG_09722		FGSG_15396	FGSG_06286		FGSG_05111		FGSG_04557
FGSG_07072	FGSG_09842	FGSG_00556		FGSG_09236	FGSG_12244		FGSG_06213		FGSG_09906
FGSG_09889	FGSG_16627	FGSG_00634		FGSG_02557	FGSG_13117		FGSG_13580		FGSG_11408
FGSG_05397	FGSG_17029	FGSG_02746		FGSG_13509	FGSG_06436		FGSG_01389		FGSG_01450
FGSG_04213	FGSG_13121	FGSG_08335		FGSG_15319	FGSG_15246		FGSG_07227		FGSG_15279
FGSG_04557	FGSG_15409	FGSG_15846		FGSG_11984	FGSG_15821		FGSG_09772		FGSG_02494
FGSG_09906	FGSG_07026	FGSG_09715		FGSG_04678	FGSG_15225		FGSG_01836		FGSG_03554
FGSG_11408	FGSG_02770	FGSG_06723		FGSG_02816	FGSG_11030		FGSG_11768		FGSG_05610
FGSG_01450	FGSG_08015	FGSG_06646		FGSG_16170	FGSG_16840		FGSG_08650		FGSG_01409
FGSG_15279	FGSG_02014	FGSG_00515		FGSG_13252	FGSG_13539		FGSG_04902		FGSG_06646
FGSG_02494	FGSG_05458	FGSG_12450		FGSG_01593	FGSG_11798		FGSG_17570		FGSG_04181
FGSG_03554	FGSG_10608	FGSG_01837		FGSG_00096	FGSG_16215		FGSG_13327		FGSG_16535
FGSG_05610	FGSG_15550	FGSG_07072		FGSG_10558			FGSG_13514		FGSG_01838
FGSG_01409	FGSG_07917	FGSG_10235		FGSG_11387			FGSG_01539		FGSG_10825
FGSG_06646	FGSG_01528	FGSG_01555		FGSG_00230			FGSG_05319		FGSG_10761
FGSG_04181	FGSG_05838	FGSG_11310		FGSG_17545			FGSG_12136		FGSG_12105
FGSG_16535	FGSG_07384	FGSG_03585		FGSG_08959			FGSG_03818		FGSG_10873
FGSG_01838	FGSG_11915	FGSG_12578		FGSG_17471			FGSG_11982		FGSG_01572
FGSG_10825	FGSG_06168	FGSG_07404		FGSG_15200			FGSG_17744		FGSG_10636
FGSG_10761	FGSG_06702	FGSG_08351		FGSG_15478			FGSG_08285		FGSG_09511
FGSG_12105	FGSG_15846	FGSG_03554		FGSG_17385			FGSG_03989		FGSG_00639
FGSG_10873	FGSG_11098	FGSG_10152		FGSG_17398			FGSG_10307		FGSG_00561
FGSG_01572	FGSG_06048	FGSG_05543		FGSG_17420			FGSG_11462		FGSG_17017
FGSG_10636	FGSG_02746	FGSG_09830		FGSG_13228			FGSG_04461		FGSG_15301
FGSG_09511	FGSG_06847	FGSG_10319		FGSG_08089			FGSG_03443		FGSG_04454
FGSG_00639	FGSG_06723	FGSG_09498		FGSG_02220			FGSG_00287		FGSG_09005
FGSG_00561	FGSG_05928	FGSG_03532		FGSG_08176			FGSG_02539		FGSG_03988
FGSG_17017	FGSG_09260	FGSG_04363		FGSG_12499			FGSG_11814		FGSG_11190
FGSG_15301	FGSG_10873	FGSG_05251		FGSG_04767			FGSG_06971		FGSG_09796
FGSG_04454	FGSG_01381	FGSG_15141		FGSG_16911			FGSG_09791		FGSG_17701
FGSG_09005	FGSG_15141	FGSG_10512		FGSG_17481			FGSG_03173		FGSG_11845
FGSG_03988	FGSG_05615	FGSG_09366		FGSG_11290			FGSG_07136		FGSG_13000
FGSG_11190	FGSG_01070	FGSG_08687		FGSG_13655			FGSG_01844		FGSG_09881
FGSG_09796	FGSG_02317	FGSG_00190		FGSG_09176			FGSG_05220		FGSG_06598
FGSG_17701	FGSG_00757	FGSG_17610		FGSG_17509			FGSG_02540		FGSG_10319
FGSG_07582	FGSG_05892	FGSG_07165		FGSG_03275			FGSG_17249		FGSG_00656
FGSG_11845	FGSG_08620	FGSG_06611		FGSG_04802			FGSG_16351		FGSG_03355
FGSG_13000	FGSG_09489	FGSG_13390		FGSG_03410			FGSG_00139		FGSG_01315
FGSG_09881	FGSG_09950	FGSG_03542		FGSG_10102			FGSG_02944		FGSG_08359
FGSG_06598	FGSG_10341	FGSG_08452		FGSG_11372			FGSG_11385		FGSG_09547
FGSG_10319	FGSG_01224	FGSG_09552		FGSG_09077			FGSG_03219		FGSG_12187
FGSG_00656	FGSG_09896	FGSG_01667		FGSG_04622			FGSG_04024		FGSG_15141
FGSG_03355	FGSG_17049	FGSG_10739		FGSG_11713			FGSG_05707		FGSG_08692
FGSG_01315	FGSG_12607	FGSG_00496		FGSG_11533			FGSG_04443		FGSG_02744
FGSG_08359	FGSG_01346	FGSG_04327		FGSG_11192			FGSG_10093		FGSG_07377
FGSG_09547	FGSG_07743	FGSG_01247		FGSG_07462			FGSG_03267		FGSG_06723
FGSG_12187	FGSG_05677	FGSG_04213		FGSG_12078			FGSG_03121		FGSG_00264
FGSG_15141	FGSG_16980	FGSG_02100		FGSG_17601			FGSG_10783		FGSG_12680
FGSG_08343	FGSG_00061	FGSG_17005		FGSG_12902			FGSG_04858		FGSG_06611
FGSG_08692	FGSG_15153	FGSG_02588		FGSG_03392			FGSG_00050		FGSG_12858
FGSG_02744	FGSG_10396	FGSG_08365		FGSG_13462			FGSG_06395		FGSG_07775
FGSG_07377	FGSG_08122	FGSG_05428		FGSG_06562			FGSG_10895		FGSG_07439
FGSG_06723	FGSG_09574	FGSG_07337		FGSG_16558			FGSG_03533		FGSG_01070
FGSG_00264	FGSG_00722	FGSG_01832		FGSG_03265			FGSG_06195		FGSG_01972
FGSG_12680	FGSG_15267	FGSG_07235		FGSG_03309			FGSG_10871		FGSG_02585
FGSG_06611	FGSG_10193	FGSG_11025		FGSG_17165			FGSG_12699		FGSG_08919
FGSG_12858	FGSG_02051	FGSG_10022		FGSG_13758			FGSG_02727		FGSG_04363
FGSG_07775	FGSG_07018	FGSG_02101		FGSG_00807			FGSG_06145		FGSG_09039
FGSG_07439	FGSG_11037	FGSG_10443		FGSG_10184			FGSG_00896		FGSG_03725
FGSG_01070	FGSG_07386	FGSG_09574		FGSG_12523			FGSG_16722		FGSG_07130
FGSG_01972	FGSG_06184	FGSG_17701		FGSG_11410			FGSG_11292		FGSG_01941
FGSG_02585	FGSG_10636	FGSG_01229		FGSG_11665			FGSG_07944		FGSG_06315
FGSG_08919	FGSG_09608	FGSG_01572		FGSG_16885			FGSG_03218		FGSG_01436
FGSG_03166	FGSG_09587	FGSG_13560		FGSG_15985			FGSG_00226		FGSG_01179
FGSG_04363	FGSG_01330	FGSG_02707		FGSG_15196			FGSG_12673		FGSG_15846
FGSG_09039	FGSG_00192	FGSG_00458		FGSG_08268			FGSG_05269		FGSG_09951
FGSG_03725	FGSG_05940	FGSG_13281		FGSG_08016			FGSG_16658		FGSG_00300
FGSG_07130	FGSG_06473	FGSG_10909		FGSG_03896			FGSG_06867		FGSG_00998
FGSG_01941	FGSG_00409	FGSG_13697		FGSG_00274			FGSG_13381		FGSG_09998
FGSG_06315	FGSG_01422	FGSG_00450		FGSG_10546			FGSG_16160		FGSG_00397
FGSG_01436	FGSG_15296	FGSG_08919		FGSG_00019			FGSG_03692		FGSG_01351
FGSG_01179	FGSG_09886	FGSG_17657		FGSG_03806			FGSG_07960		FGSG_11706
FGSG_15846	FGSG_00190	FGSG_09889		FGSG_01681			FGSG_13709		FGSG_00458
FGSG_09951	FGSG_01915	FGSG_11460		FGSG_04997			FGSG_11838		FGSG_15745
FGSG_00300	FGSG_12606	FGSG_00373		FGSG_17677			FGSG_01640		FGSG_06825
FGSG_00998	FGSG_02373	FGSG_08714		FGSG_07388			FGSG_11150		FGSG_10855
FGSG_09998	FGSG_13105	FGSG_07401		FGSG_11666			FGSG_05856		FGSG_01528
FGSG_00397	FGSG_10512	FGSG_00620		FGSG_02890			FGSG_09538		FGSG_06318
FGSG_01351	FGSG_00264	FGSG_05471		FGSG_17616			FGSG_01335		FGSG_02578
FGSG_04512	FGSG_00393	FGSG_06209		FGSG_12374			FGSG_12694		FGSG_17657
FGSG_11706	FGSG_11104	FGSG_04824		FGSG_08109			FGSG_04474		FGSG_02764
FGSG_00458	FGSG_01459	FGSG_05141		FGSG_13902			FGSG_01929		FGSG_07401
FGSG_15745	FGSG_10782	FGSG_12193		FGSG_03101			FGSG_04386		FGSG_04271
FGSG_06825	FGSG_08398	FGSG_07674		FGSG_04747			FGSG_16320		FGSG_01950
FGSG_10855	FGSG_01450	FGSG_07282		FGSG_15159			FGSG_00334		FGSG_05615
FGSG_01528	FGSG_03467	FGSG_12207		FGSG_10661			FGSG_06997		FGSG_09438
FGSG_06318	FGSG_04034	FGSG_05164		FGSG_17357			FGSG_00404		FGSG_12110
FGSG_02578	FGSG_02497	FGSG_00045		FGSG_10559			FGSG_03672		FGSG_07851
FGSG_17657	FGSG_01179	FGSG_06784		FGSG_01790			FGSG_01616		FGSG_02284
FGSG_00028	FGSG_09739	FGSG_06130		FGSG_08120			FGSG_02459		FGSG_13931
FGSG_02903	FGSG_06397	FGSG_06936		FGSG_05678			FGSG_02308		FGSG_10281
FGSG_02764	FGSG_07536	FGSG_00722		FGSG_02109			FGSG_00064		FGSG_00168
FGSG_07401	FGSG_11005	FGSG_01436		FGSG_03556			FGSG_03337		FGSG_04115
FGSG_04271	FGSG_00373	FGSG_09933		FGSG_03730			FGSG_01688		FGSG_07334
FGSG_01950	FGSG_00577	FGSG_07213		FGSG_12439			FGSG_16851		FGSG_17257
FGSG_05615	FGSG_06531	FGSG_03347		FGSG_01145			FGSG_16632		FGSG_05133
FGSG_09438	FGSG_16728	FGSG_07949		FGSG_04059			FGSG_06016		FGSG_03829
FGSG_12110	FGSG_04923	FGSG_10531		FGSG_01754			FGSG_00046		FGSG_04034
FGSG_07851	FGSG_03593	FGSG_06858		FGSG_17078			FGSG_17197		FGSG_00644
FGSG_02284	FGSG_00681	FGSG_02541		FGSG_07880			FGSG_05951		FGSG_05892
FGSG_13931	FGSG_15438	FGSG_15279		FGSG_06468			FGSG_17273		FGSG_02469
FGSG_10281	FGSG_15008	FGSG_08402		FGSG_15552			FGSG_04862		FGSG_06600
FGSG_00168	FGSG_01199	FGSG_06668		FGSG_03455			FGSG_01465		FGSG_08620
FGSG_04115	FGSG_11110	FGSG_10117		FGSG_09376			FGSG_17488		FGSG_12193
FGSG_07334	FGSG_13053	FGSG_05210		FGSG_11849			FGSG_06870		FGSG_12999
FGSG_17257	FGSG_02461	FGSG_09511		FGSG_05988			FGSG_00483		FGSG_00330
FGSG_05133	FGSG_15688	FGSG_11628		FGSG_06303			FGSG_01652		FGSG_07467
FGSG_03829	FGSG_07921	FGSG_06474		FGSG_16984			FGSG_16047		FGSG_04490
FGSG_04034	FGSG_08700	FGSG_17521		FGSG_05935			FGSG_17635		FGSG_00455
FGSG_00644	FGSG_07822	FGSG_02378		FGSG_04438			FGSG_09720		FGSG_12450
FGSG_05892	FGSG_01247	FGSG_00663		FGSG_00119			FGSG_03786		FGSG_10800
FGSG_02469	FGSG_08291	FGSG_00358		FGSG_13818			FGSG_08889		FGSG_05454
FGSG_06600	FGSG_10064	FGSG_10010		FGSG_17355			FGSG_12703		FGSG_07602
FGSG_08620	FGSG_13194	FGSG_00603		FGSG_02274			FGSG_04708		FGSG_11741
FGSG_12193	FGSG_00510	FGSG_00564		FGSG_04526			FGSG_10190		FGSG_09950
FGSG_12999	FGSG_06917	FGSG_03385		FGSG_15872			FGSG_15994		FGSG_03518
FGSG_00330	FGSG_00016	FGSG_03688		FGSG_08248			FGSG_02003		FGSG_01555
FGSG_07467	FGSG_03424	FGSG_09522		FGSG_09131			FGSG_00606		FGSG_12240
FGSG_04490	FGSG_05481	FGSG_04933		FGSG_15945			FGSG_10980		FGSG_11054
FGSG_00455	FGSG_17657	FGSG_01915		FGSG_05793			FGSG_15959		FGSG_09715
FGSG_12450	FGSG_00496	FGSG_08478		FGSG_12590			FGSG_08734		FGSG_17182
FGSG_10800	FGSG_06936	FGSG_12858		FGSG_11545			FGSG_00197		FGSG_16980
FGSG_05454	FGSG_15022	FGSG_00421		FGSG_07823			FGSG_00340		FGSG_06168
FGSG_07602	FGSG_08295	FGSG_01013		FGSG_04814			FGSG_00109		FGSG_08765
FGSG_11741	FGSG_03911	FGSG_00765		FGSG_17350			FGSG_16835		FGSG_06878
FGSG_09950	FGSG_03842	FGSG_09951		FGSG_17464			FGSG_08892		FGSG_13697
FGSG_03518	FGSG_11036	FGSG_02926		FGSG_08224			FGSG_12409		FGSG_07018
FGSG_01555	FGSG_08682	FGSG_05620		FGSG_12434			FGSG_17293		FGSG_10833
FGSG_12240	FGSG_07074	FGSG_06289		FGSG_09375			FGSG_10977		FGSG_01866
FGSG_11054	FGSG_08365	FGSG_09786		FGSG_17582			FGSG_09087		FGSG_02978
FGSG_09715	FGSG_00330	FGSG_13535		FGSG_16213			FGSG_00307		FGSG_17005
FGSG_17182	FGSG_00444	FGSG_16873		FGSG_16388			FGSG_09706		FGSG_03312
FGSG_16980	FGSG_11878	FGSG_01398		FGSG_08006			FGSG_16772		FGSG_13121
FGSG_06168	FGSG_03988	FGSG_06125		FGSG_07725			FGSG_15986		FGSG_08290
FGSG_08765	FGSG_01241	FGSG_12105		FGSG_06881			FGSG_02993		FGSG_09072
FGSG_06878	FGSG_00687	FGSG_05320		FGSG_11155			FGSG_09328		FGSG_05026
FGSG_13697	FGSG_05407	FGSG_16535		FGSG_16422			FGSG_08171		FGSG_12483
FGSG_07018	FGSG_10050	FGSG_07602		FGSG_15271			FGSG_03368		FGSG_00136
FGSG_10833	FGSG_00458	FGSG_07475		FGSG_05795			FGSG_16189		FGSG_04489
FGSG_01866	FGSG_05610	FGSG_05454		FGSG_11212			FGSG_17012		FGSG_06566
FGSG_02978	FGSG_02758	FGSG_16556		FGSG_17387			FGSG_08432		FGSG_01408
FGSG_17005	FGSG_02022	FGSG_07467		FGSG_12443			FGSG_09243		FGSG_15609
FGSG_03312	FGSG_11825	FGSG_10396		FGSG_03729			FGSG_12467		FGSG_15550
FGSG_13121	FGSG_09933	FGSG_00743		FGSG_10827			FGSG_00774		FGSG_09220
FGSG_08290	FGSG_07851	FGSG_02038		FGSG_04781			FGSG_03329		FGSG_15028
FGSG_09072	FGSG_09280	FGSG_11054		FGSG_15517			FGSG_01312		FGSG_04983
FGSG_05026	FGSG_09552	FGSG_06531		FGSG_03811			FGSG_01730		FGSG_08351
FGSG_12483	FGSG_11618	FGSG_06035		FGSG_02103			FGSG_12684		FGSG_13350
FGSG_00136	FGSG_17701	FGSG_06328		FGSG_00734			FGSG_01756		FGSG_12555
FGSG_04489	FGSG_10810	FGSG_10796		FGSG_13984			FGSG_03181		FGSG_11915
FGSG_06566	FGSG_07953	FGSG_00921		FGSG_17092			FGSG_05644		FGSG_10759
FGSG_01408	FGSG_07439	FGSG_05301		FGSG_08408			FGSG_15233		FGSG_02814
FGSG_15609	FGSG_13137	FGSG_07908		FGSG_08118			FGSG_10891		FGSG_11762
FGSG_15550	FGSG_04741	FGSG_11190		FGSG_07354			FGSG_17339		FGSG_09455
FGSG_09220	FGSG_00556	FGSG_05535		FGSG_17113			FGSG_10749		FGSG_01594
FGSG_15028	FGSG_13464	FGSG_01215		FGSG_08147			FGSG_07134		FGSG_12691
FGSG_04983	FGSG_07282	FGSG_08277		FGSG_15518			FGSG_05131		FGSG_08277
FGSG_08351	FGSG_12193	FGSG_12857		FGSG_13407			FGSG_08024		FGSG_08929
FGSG_13350	FGSG_00793	FGSG_10424		FGSG_17479			FGSG_02182		FGSG_05489
FGSG_12555	FGSG_08946	FGSG_09825		FGSG_09293			FGSG_00696		FGSG_01897
FGSG_11915	FGSG_07401	FGSG_05407		FGSG_02158			FGSG_13130		FGSG_08663
FGSG_10759	FGSG_12418	FGSG_00397		FGSG_03696			FGSG_17696		FGSG_10193
FGSG_02814	FGSG_04306	FGSG_04410		FGSG_12651			FGSG_16293		FGSG_05410
FGSG_11762	FGSG_04283	FGSG_03988		FGSG_07557			FGSG_17624		FGSG_05374
FGSG_09455	FGSG_09591	FGSG_15550		FGSG_08666			FGSG_07413		FGSG_06397
FGSG_01594	FGSG_10614	FGSG_16741		FGSG_10404			FGSG_01807		FGSG_09012
FGSG_12691	FGSG_17483	FGSG_16161		FGSG_11125			FGSG_13953		FGSG_09587
FGSG_08277	FGSG_10022	FGSG_05011		FGSG_02035			FGSG_13250		FGSG_09983
FGSG_08929	FGSG_00421	FGSG_05594		FGSG_11516			FGSG_09523		FGSG_05733
FGSG_05489	FGSG_17106	FGSG_08560		FGSG_04064			FGSG_11227		FGSG_06703
FGSG_01897	FGSG_01341	FGSG_09041		FGSG_15481			FGSG_07371		FGSG_05839
FGSG_08663	FGSG_01342	FGSG_02273		FGSG_13246			FGSG_06149		FGSG_09990
FGSG_10193	FGSG_04226	FGSG_01422		FGSG_11505			FGSG_15952		FGSG_07213
FGSG_05410	FGSG_07478	FGSG_02810		FGSG_02813			FGSG_06042		FGSG_08275
FGSG_05374	FGSG_03674	FGSG_01588		FGSG_04976			FGSG_06025		FGSG_01667
FGSG_04580	FGSG_10800	FGSG_10080		FGSG_15786			FGSG_10815		FGSG_10118
FGSG_06397	FGSG_01752	FGSG_01026		FGSG_13958			FGSG_15811		FGSG_01962
FGSG_03537	FGSG_05251	FGSG_00044		FGSG_05710			FGSG_04504		FGSG_06154
FGSG_09012	FGSG_02607	FGSG_01232		FGSG_04861			FGSG_02201		FGSG_03165
FGSG_09587	FGSG_12181	FGSG_02699		FGSG_08157			FGSG_17122		FGSG_05082
FGSG_09983	FGSG_08919	FGSG_02508		FGSG_13377			FGSG_07567		FGSG_11413
FGSG_05733	FGSG_00861	FGSG_03520		FGSG_10508			FGSG_10534		FGSG_13963
FGSG_06703	FGSG_09252	FGSG_04560		FGSG_16466			FGSG_00844		FGSG_10002
FGSG_05839	FGSG_05784	FGSG_07416		FGSG_09189			FGSG_15708		FGSG_11628
FGSG_09990	FGSG_02469	FGSG_00588		FGSG_10581			FGSG_11364		FGSG_17334
FGSG_07213	FGSG_13947	FGSG_05235		FGSG_04676			FGSG_05472		FGSG_11900
FGSG_08275	FGSG_01436	FGSG_02328		FGSG_11707			FGSG_02854		FGSG_06531
FGSG_01667	FGSG_02285	FGSG_02479		FGSG_13835			FGSG_01426		FGSG_07895
FGSG_10118	FGSG_03591	FGSG_10833		FGSG_15417			FGSG_09099		FGSG_02474
FGSG_01962	FGSG_17017	FGSG_10002		FGSG_12342			FGSG_04841		FGSG_00709
FGSG_10397	FGSG_09983	FGSG_02753		FGSG_16277			FGSG_02203		FGSG_10755
FGSG_06154	FGSG_05301	FGSG_00855		FGSG_03871			FGSG_16225		FGSG_09739
FGSG_03165	FGSG_15451	FGSG_00136		FGSG_08233			FGSG_05592		FGSG_00722
FGSG_05082	FGSG_07274	FGSG_06168		FGSG_17101			FGSG_02949		FGSG_09591
FGSG_11413	FGSG_12105	FGSG_00781		FGSG_16678			FGSG_12763		FGSG_13412
FGSG_13963	FGSG_08306	FGSG_00860		FGSG_00070			FGSG_17047		FGSG_15999
FGSG_10002	FGSG_16018	FGSG_07303		FGSG_16178			FGSG_10289		FGSG_09267
FGSG_11628	FGSG_05210	FGSG_02494		FGSG_03909			FGSG_06343		FGSG_02001
FGSG_17334	FGSG_01228	FGSG_00510		FGSG_16193			FGSG_09065		FGSG_11602
FGSG_11900	FGSG_05141	FGSG_10770		FGSG_04437			FGSG_02168		FGSG_00871
FGSG_06531	FGSG_10892	FGSG_02497		FGSG_07687			FGSG_10538		FGSG_13962
FGSG_07895	FGSG_13573	FGSG_00656		FGSG_16310			FGSG_07585		FGSG_06039
FGSG_02474	FGSG_00849	FGSG_02324		FGSG_15928			FGSG_09636		FGSG_08739
FGSG_00709	FGSG_04363	FGSG_07588		FGSG_03391			FGSG_16256		FGSG_13105
FGSG_10755	FGSG_10909	FGSG_09321		FGSG_16412			FGSG_15680		FGSG_03466
FGSG_09739	FGSG_16843	FGSG_04204		FGSG_10401			FGSG_03420		FGSG_00577
FGSG_00722	FGSG_05375	FGSG_05943		FGSG_11185			FGSG_12341		FGSG_05594
FGSG_09591	FGSG_11888	FGSG_06703		FGSG_03362			FGSG_13882		FGSG_05210
FGSG_13412	FGSG_08548	FGSG_00314		FGSG_11974			FGSG_02106		FGSG_05301
FGSG_15999	FGSG_13630	FGSG_10258		FGSG_11089			FGSG_08887		FGSG_07363
FGSG_09267	FGSG_11900	FGSG_07090		FGSG_12987			FGSG_16048		FGSG_05428
FGSG_02001	FGSG_03247	FGSG_00303		FGSG_13504			FGSG_13262		FGSG_05784
FGSG_11602	FGSG_00656	FGSG_12726		FGSG_06470			FGSG_16437		FGSG_01199
FGSG_00871	FGSG_06819	FGSG_06929		FGSG_03063			FGSG_12196		FGSG_02225
FGSG_13962	FGSG_07488	FGSG_04488		FGSG_17585			FGSG_15791		FGSG_06473
FGSG_06039	FGSG_15028	FGSG_02502		FGSG_12121			FGSG_03880		FGSG_09205
FGSG_08739	FGSG_10974	FGSG_09053		FGSG_04660			FGSG_11786		FGSG_06288
FGSG_13105	FGSG_02645	FGSG_09591		FGSG_09622			FGSG_00344		FGSG_15034
FGSG_03466	FGSG_05852	FGSG_06612		FGSG_03918			FGSG_06694		FGSG_00409
FGSG_00577	FGSG_03725	FGSG_07961		FGSG_17378			FGSG_10728		FGSG_15009
FGSG_05594	FGSG_07416	FGSG_17017		FGSG_01758			FGSG_10626		FGSG_04327
FGSG_05210	FGSG_10562	FGSG_04908		FGSG_13631			FGSG_00129		FGSG_00904
FGSG_05301	FGSG_02494	FGSG_11230		FGSG_16099			FGSG_12938		FGSG_00564
FGSG_07363	FGSG_10761	FGSG_16031		FGSG_12920			FGSG_15940		FGSG_08674
FGSG_05428	FGSG_00455	FGSG_00300		FGSG_08262			FGSG_04169		FGSG_09016
FGSG_05784	FGSG_10117	FGSG_04034		FGSG_15556			FGSG_08831		FGSG_15003
FGSG_01199	FGSG_06575	FGSG_02464		FGSG_04241			FGSG_16847		FGSG_00444
FGSG_03185	FGSG_17502	FGSG_00561		FGSG_09343			FGSG_13632		FGSG_06909
FGSG_02225	FGSG_12119	FGSG_05433		FGSG_17486			FGSG_08237		FGSG_10737
FGSG_06473	FGSG_11249	FGSG_02030		FGSG_07613			FGSG_00235		FGSG_10885
FGSG_09205	FGSG_09133	FGSG_07476		FGSG_08464			FGSG_04251		FGSG_02030
FGSG_06288	FGSG_06039	FGSG_08663		FGSG_13920			FGSG_13528		FGSG_01279
FGSG_15034	FGSG_04068	FGSG_06108		FGSG_08098			FGSG_16926		FGSG_06370
FGSG_00409	FGSG_07235	FGSG_06871		FGSG_03530			FGSG_09837		FGSG_00497
FGSG_15009	FGSG_16719	FGSG_12683		FGSG_16371			FGSG_11928		FGSG_05065
FGSG_04327	FGSG_03123	FGSG_04207		FGSG_07844			FGSG_15902		FGSG_10048
FGSG_00904	FGSG_08723	FGSG_05447		FGSG_16294			FGSG_02776		FGSG_02607
FGSG_00564	FGSG_06646	FGSG_15910		FGSG_10708			FGSG_11609		FGSG_00150
FGSG_08674	FGSG_02558	FGSG_09940		FGSG_04435			FGSG_01510		FGSG_12531
FGSG_04596	FGSG_17600	FGSG_07953		FGSG_17475			FGSG_09348		FGSG_12862
FGSG_09016	FGSG_04074	FGSG_01111		FGSG_00980			FGSG_00044		FGSG_10075
FGSG_15003	FGSG_07337	FGSG_06530		FGSG_03651			FGSG_03390		FGSG_07404
FGSG_00444	FGSG_05637	FGSG_01941		FGSG_15198			FGSG_10798		FGSG_05365
FGSG_06909	FGSG_04286	FGSG_05610		FGSG_13861			FGSG_13115		FGSG_09844
FGSG_10737	FGSG_08314	FGSG_03148		FGSG_03052			FGSG_17144		FGSG_02758
FGSG_10885	FGSG_07830	FGSG_05892		FGSG_17546			FGSG_09509		FGSG_00861
FGSG_02030	FGSG_15542	FGSG_05134		FGSG_05746			FGSG_16339		FGSG_01622
FGSG_01279	FGSG_04626	FGSG_01031		FGSG_15726			FGSG_00672		FGSG_06483
FGSG_06370	FGSG_09443	FGSG_00717		FGSG_12459			FGSG_15245		FGSG_02342
FGSG_00497	FGSG_03585	FGSG_09983		FGSG_13978			FGSG_07411		FGSG_06337
FGSG_05065	FGSG_05374	FGSG_10746		FGSG_16874			FGSG_07360		FGSG_07257
FGSG_10048	FGSG_12555	FGSG_05631		FGSG_03613			FGSG_17180		FGSG_09940
FGSG_02607	FGSG_01398	FGSG_10086		FGSG_03748			FGSG_02688		FGSG_08949
FGSG_00150	FGSG_09498	FGSG_02317		FGSG_11363			FGSG_00011		FGSG_08306
FGSG_12531	FGSG_17005	FGSG_06315		FGSG_04503			FGSG_16662		FGSG_07235
FGSG_12862	FGSG_07377	FGSG_06878		FGSG_07351			FGSG_10043		FGSG_15399
FGSG_10075	FGSG_08844	FGSG_10761		FGSG_11126			FGSG_11686		FGSG_06125
FGSG_07404	FGSG_03296	FGSG_03569		FGSG_02333			FGSG_09255		FGSG_00338
FGSG_05365	FGSG_01331	FGSG_06819		FGSG_15339			FGSG_04817		FGSG_12369
FGSG_09844	FGSG_05489	FGSG_11927		FGSG_15597			FGSG_13444		FGSG_06871
FGSG_02758	FGSG_00168	FGSG_15013		FGSG_00550			FGSG_17723		FGSG_01031
FGSG_00861	FGSG_09990	FGSG_03111		FGSG_04099			FGSG_13104		FGSG_04155
FGSG_01622	FGSG_01421	FGSG_06159		FGSG_03735.2			FGSG_13196		FGSG_10022
FGSG_11467	FGSG_05134	FGSG_06508		FGSG_11067			FGSG_11614		FGSG_08630
FGSG_06483	FGSG_17577	FGSG_10488		FGSG_10565			FGSG_03233		FGSG_13281
FGSG_02342	FGSG_03315	FGSG_16145		FGSG_08247			FGSG_08159		FGSG_13257
FGSG_06337	FGSG_12858	FGSG_08884		FGSG_12490			FGSG_00685		FGSG_07515
FGSG_07257	FGSG_09563	FGSG_09998		FGSG_16373			FGSG_17215		FGSG_05057
FGSG_09940	FGSG_03319	FGSG_00360		FGSG_17560			FGSG_02626		FGSG_06744
FGSG_08949	FGSG_01818	FGSG_17628		FGSG_04627			FGSG_10194		FGSG_01228
FGSG_08306	FGSG_13535	FGSG_11496		FGSG_03041			FGSG_17558		FGSG_16938
FGSG_04581	FGSG_10808	FGSG_00863		FGSG_06451			FGSG_12671		FGSG_09862
FGSG_07235	FGSG_04115	FGSG_00998		FGSG_04795			FGSG_11817		FGSG_01301
FGSG_15399	FGSG_16207	FGSG_09373		FGSG_13043			FGSG_05013		FGSG_07438
FGSG_06125	FGSG_10905	FGSG_06115		FGSG_03513			FGSG_09567		FGSG_00177
FGSG_00338	FGSG_11706	FGSG_16595		FGSG_09224			FGSG_16478		FGSG_07651
FGSG_12369	FGSG_00639	FGSG_15041		FGSG_04247			FGSG_02215		FGSG_07830
FGSG_06871	FGSG_06383	FGSG_15028		FGSG_16304			FGSG_00582		FGSG_11939
FGSG_01031	FGSG_12970	FGSG_02461		FGSG_03217			FGSG_13677		FGSG_08864
FGSG_04155	FGSG_02101	FGSG_02560		FGSG_02547			FGSG_03857		FGSG_10297
FGSG_10022	FGSG_07363	FGSG_10885		FGSG_10923			FGSG_04500		FGSG_10276
FGSG_11399	FGSG_08663	FGSG_05738		FGSG_15470			FGSG_13003		FGSG_12857
FGSG_08630	FGSG_09078	FGSG_06389		FGSG_01986			FGSG_16738		FGSG_11205
FGSG_13281	FGSG_10116	FGSG_09623		FGSG_12721			FGSG_12259		FGSG_11618
FGSG_13257	FGSG_07073	FGSG_01962		FGSG_15892			FGSG_15232		FGSG_02101
FGSG_07515	FGSG_06530	FGSG_00822		FGSG_02382			FGSG_00551		FGSG_10496
FGSG_05057	FGSG_10281	FGSG_00406		FGSG_17547			FGSG_16368		FGSG_01837
FGSG_03315	FGSG_09000	FGSG_05489		FGSG_03619			FGSG_16423		FGSG_10160
FGSG_06744	FGSG_00717	FGSG_09335		FGSG_10408			FGSG_13166		FGSG_01398
FGSG_01228	FGSG_10939	FGSG_10779		FGSG_13386			FGSG_01711		FGSG_10258
FGSG_16938	FGSG_11628	FGSG_15399		FGSG_10252			FGSG_02704		FGSG_03915
FGSG_09862	FGSG_13685	FGSG_00687		FGSG_09477			FGSG_15995		FGSG_06955
FGSG_01301	FGSG_16003	FGSG_11845		FGSG_03592			FGSG_17093		FGSG_07536
FGSG_07438	FGSG_00342	FGSG_09547		FGSG_03817			FGSG_11073		FGSG_10808
FGSG_00177	FGSG_10887	FGSG_02607		FGSG_06232					FGSG_15041
FGSG_07651	FGSG_09438	FGSG_09313		FGSG_05805					FGSG_07269
FGSG_07830	FGSG_12746	FGSG_10255		FGSG_12608					FGSG_13330
FGSG_11939	FGSG_09511	FGSG_00046		FGSG_07821					FGSG_13390
FGSG_08864	FGSG_00450	FGSG_05384		FGSG_15978					FGSG_10796
FGSG_10297	FGSG_11054	FGSG_10887		FGSG_07648					FGSG_08314
FGSG_10276	FGSG_06566	FGSG_13105		FGSG_07763					FGSG_00781
FGSG_12857	FGSG_16059	FGSG_06909		FGSG_15189					FGSG_10746
FGSG_11205	FGSG_06474	FGSG_06564		FGSG_09056					FGSG_10779
FGSG_11618	FGSG_00314	FGSG_09864		FGSG_11448					FGSG_07299
FGSG_03543	FGSG_10048	FGSG_07999		FGSG_03902					FGSG_10117
FGSG_02101	FGSG_00709	FGSG_10160		FGSG_15100					FGSG_06864
FGSG_10496	FGSG_05065	FGSG_07598		FGSG_08535					FGSG_05663
FGSG_01837	FGSG_04176	FGSG_08077		FGSG_04439					FGSG_03125
FGSG_10160	FGSG_04489	FGSG_10959		FGSG_02928					FGSG_07473
FGSG_01398	FGSG_00300	FGSG_16251		FGSG_09331					FGSG_03123
FGSG_10258	FGSG_16535	FGSG_05169		FGSG_07748					FGSG_00421
FGSG_03915	FGSG_17044	FGSG_11617		FGSG_08044					FGSG_00642
FGSG_06955	FGSG_04327	FGSG_11597		FGSG_08741					FGSG_00609
FGSG_07536	FGSG_06209	FGSG_09220		FGSG_15459					FGSG_05001
FGSG_10808	FGSG_15437	FGSG_07363		FGSG_09159					FGSG_01232
FGSG_15041	FGSG_03804	FGSG_15153		FGSG_15338					FGSG_04094
FGSG_07269	FGSG_09741	FGSG_01622		FGSG_09702					FGSG_05323
FGSG_13330	FGSG_01283	FGSG_16768		FGSG_00966					FGSG_09742
FGSG_13390	FGSG_03144	FGSG_01648		FGSG_15929					FGSG_05141
FGSG_10796	FGSG_08617	FGSG_08593		FGSG_10917					FGSG_08489
FGSG_08314	FGSG_01039	FGSG_15610		FGSG_02332					FGSG_03946
FGSG_00781	FGSG_03028	FGSG_04886		FGSG_13425					FGSG_10772
FGSG_10746	FGSG_04917	FGSG_07670		FGSG_15112					FGSG_09280
FGSG_10779	FGSG_02578	FGSG_01083		FGSG_11143					FGSG_04558
FGSG_07299	FGSG_08983	FGSG_00168		FGSG_02294					FGSG_02028
FGSG_10117	FGSG_01667	FGSG_10170		FGSG_10673					FGSG_06858
FGSG_06864	FGSG_00303	FGSG_11748		FGSG_07829					FGSG_04223
FGSG_05663	FGSG_00564	FGSG_06803		FGSG_11868					FGSG_09493
FGSG_03125	FGSG_02249	FGSG_08850							FGSG_06530
FGSG_07473	FGSG_12019	FGSG_10808							FGSG_03347
FGSG_03123	FGSG_00863	FGSG_11408							FGSG_00495
FGSG_00421	FGSG_09906	FGSG_05277							FGSG_10304
FGSG_00642	FGSG_13390	FGSG_00857							FGSG_11927
FGSG_00609	FGSG_07949	FGSG_08306							FGSG_00470
FGSG_05001	FGSG_10142	FGSG_02444							FGSG_09580
FGSG_01232	FGSG_05631	FGSG_07477							FGSG_05375
FGSG_04094	FGSG_06703	FGSG_07186							FGSG_06861
FGSG_05323	FGSG_08290	FGSG_08564							FGSG_08593
FGSG_09742	FGSG_06895	FGSG_06683							FGSG_08689
FGSG_05141	FGSG_15041	FGSG_16608							FGSG_02202
FGSG_08489	FGSG_05535	FGSG_05409							FGSG_08023
FGSG_03946	FGSG_16145	FGSG_10738							FGSG_15153
FGSG_10772	FGSG_08275	FGSG_00871							FGSG_07416
FGSG_09280	FGSG_10776	FGSG_01123							FGSG_09928
FGSG_04558	FGSG_12726	FGSG_00050							FGSG_07948
FGSG_02028	FGSG_10770	FGSG_06337							FGSG_06246
FGSG_06858	FGSG_01965	FGSG_09266							FGSG_02092
FGSG_04223	FGSG_10080	FGSG_09833							FGSG_16145
FGSG_09493	FGSG_01232	FGSG_07269							FGSG_02317
FGSG_06530	FGSG_11442	FGSG_05365							FGSG_11046
FGSG_03347	FGSG_03344	FGSG_06394							FGSG_00786
FGSG_00495	FGSG_01013	FGSG_09205							FGSG_06917
FGSG_10304	FGSG_07248	FGSG_08689							FGSG_10832
FGSG_11927	FGSG_01301	FGSG_00177							FGSG_07961
FGSG_00470	FGSG_00781	FGSG_06711							FGSG_00766
FGSG_09580	FGSG_00714	FGSG_17182							FGSG_01215
FGSG_05375	FGSG_09012	FGSG_10092							FGSG_16869
FGSG_06861	FGSG_09493	FGSG_00644							FGSG_09554
FGSG_08593	FGSG_01408	FGSG_01950							FGSG_10231
FGSG_08689	FGSG_08277	FGSG_08929							FGSG_03529
FGSG_02202	FGSG_08687	FGSG_10772							FGSG_10268
FGSG_08023	FGSG_00764	FGSG_13199							FGSG_05614
FGSG_15153	FGSG_10787	FGSG_15018							FGSG_00926
FGSG_07416	FGSG_16979	FGSG_08314							FGSG_07476
FGSG_09928	FGSG_02810	FGSG_04285							FGSG_07285
FGSG_07948	FGSG_07160	FGSG_03803							FGSG_06220
FGSG_06246	FGSG_06825	FGSG_09554							FGSG_03300
FGSG_02092	FGSG_01622	FGSG_12495							FGSG_00568
FGSG_16145	FGSG_08546	FGSG_17571							FGSG_12683
FGSG_02317	FGSG_01941	FGSG_02828							FGSG_13296
FGSG_11046	FGSG_00900	FGSG_17600							FGSG_01224
FGSG_00786	FGSG_06125	FGSG_03300							FGSG_05134
FGSG_06917	FGSG_07910	FGSG_08495							FGSG_01083
FGSG_10832	FGSG_09951	FGSG_07393							FGSG_11101
FGSG_09353	FGSG_04285	FGSG_12187							FGSG_04002
FGSG_07961	FGSG_06664	FGSG_03749							FGSG_07182
FGSG_00766	FGSG_02508	FGSG_03725							FGSG_05907
FGSG_01215	FGSG_07476	FGSG_07824							FGSG_09786
FGSG_16869	FGSG_03539	FGSG_11915							FGSG_13136
FGSG_09554	FGSG_01672	FGSG_07248							FGSG_01870
FGSG_10231	FGSG_06483	FGSG_00342							FGSG_09980
FGSG_03529	FGSG_07865	FGSG_04044							FGSG_16006
FGSG_10268	FGSG_03584	FGSG_01245							FGSG_02508
FGSG_05614	FGSG_00860	FGSG_09235							FGSG_06905
FGSG_00926	FGSG_06724	FGSG_03693							FGSG_13194
FGSG_07476	FGSG_16741	FGSG_07865							FGSG_16741
FGSG_07285	FGSG_03581	FGSG_00886							FGSG_09556
FGSG_06220	FGSG_02028	FGSG_17334							FGSG_01343
FGSG_03300	FGSG_17637	FGSG_04181							FGSG_09563
FGSG_00568	FGSG_04874	FGSG_11440							FGSG_02699
FGSG_12683	FGSG_05357	FGSG_01408							FGSG_05486
FGSG_13296	FGSG_06611	FGSG_09595							FGSG_03081
FGSG_01224	FGSG_05117	FGSG_11825							FGSG_03749
FGSG_00237	FGSG_10418	FGSG_05846							FGSG_11878
FGSG_05134	FGSG_02668	FGSG_09580							FGSG_07478
FGSG_01083	FGSG_05906	FGSG_15609							FGSG_10355
FGSG_11101	FGSG_02059	FGSG_07573							FGSG_09530
FGSG_04002	FGSG_04761	FGSG_11706							FGSG_03992
FGSG_07182	FGSG_01386	FGSG_09733							FGSG_07090
FGSG_05907	FGSG_00122	FGSG_05323							FGSG_07949
FGSG_09786	FGSG_05630	FGSG_12331							FGSG_01239
FGSG_13136	FGSG_11740	FGSG_10905							FGSG_09498
FGSG_01870	FGSG_06683	FGSG_07441							FGSG_06711
FGSG_09980	FGSG_02479	FGSG_16667							FGSG_11368
FGSG_16006	FGSG_16336	FGSG_00350							FGSG_01013
FGSG_02508	FGSG_07467	FGSG_03191							FGSG_12331
FGSG_06905	FGSG_06203	FGSG_13257							FGSG_02785
FGSG_13194	FGSG_08747	FGSG_13072							FGSG_05407
FGSG_16741	FGSG_10255	FGSG_09817							FGSG_03379
FGSG_09556	FGSG_02217	FGSG_07315							FGSG_00859
FGSG_01343	FGSG_04213	FGSG_04115							FGSG_11936
FGSG_09563	FGSG_04600	FGSG_01342							FGSG_06532
FGSG_02699	FGSG_06803	FGSG_02247							FGSG_08747
FGSG_05486	FGSG_13109	FGSG_06473							FGSG_09830
FGSG_03081	FGSG_00295	FGSG_04454							FGSG_09955
FGSG_03749	FGSG_08929	FGSG_06166							FGSG_09966
FGSG_11878	FGSG_05320	FGSG_08857							FGSG_00358
FGSG_07478	FGSG_01183	FGSG_12388							FGSG_02544
FGSG_10355	FGSG_02092	FGSG_01782							FGSG_04313
FGSG_09530	FGSG_17094	FGSG_02262							FGSG_09235
FGSG_03992	FGSG_11258	FGSG_12846							FGSG_10354
FGSG_07090	FGSG_02600	FGSG_12690							FGSG_10347
FGSG_07949	FGSG_10268	FGSG_06720							FGSG_05267
FGSG_01239	FGSG_12857	FGSG_01421							FGSG_06929
FGSG_09498	FGSG_06858	FGSG_09438							FGSG_09618
FGSG_06711	FGSG_04003	FGSG_17623							FGSG_11977
FGSG_11368	FGSG_04998	FGSG_07425							FGSG_08988
FGSG_01013	FGSG_01580	FGSG_05133							FGSG_01245
FGSG_12331	FGSG_00435	FGSG_05501							FGSG_08567
FGSG_02785	FGSG_00495	FGSG_12937							FGSG_10787
FGSG_05407	FGSG_15653	FGSG_01377							FGSG_05997
FGSG_03379	FGSG_09381	FGSG_05310							FGSG_05501
FGSG_00859	FGSG_02100	FGSG_00288							FGSG_16377
FGSG_11936	FGSG_12292	FGSG_08347							FGSG_09035
FGSG_06532	FGSG_11097	FGSG_10363							FGSG_03168
FGSG_08747	FGSG_04540	FGSG_02901							FGSG_15773
FGSG_09830	FGSG_09403	FGSG_11878							FGSG_06209
FGSG_09955	FGSG_09940	FGSG_05065							FGSG_05132
FGSG_09966	FGSG_15013	FGSG_00338							FGSG_06474
FGSG_00358	FGSG_07213	FGSG_08489							FGSG_08857
FGSG_02544	FGSG_02162	FGSG_13310							FGSG_07233
FGSG_04313	FGSG_05425	FGSG_00529							FGSG_00450
FGSG_01531	FGSG_02764	FGSG_05194							FGSG_08564
FGSG_09235	FGSG_09085	FGSG_16003							FGSG_10810
FGSG_10354	FGSG_17722	FGSG_17598							FGSG_08266
FGSG_10347	FGSG_09864	FGSG_03466							FGSG_07282
FGSG_03412	FGSG_12739	FGSG_17013							FGSG_02479
FGSG_05267	FGSG_07233	FGSG_04570							FGSG_02262
FGSG_06929	FGSG_00438	FGSG_09016							FGSG_04068
FGSG_09618	FGSG_05365	FGSG_10216							FGSG_02138
FGSG_10529	FGSG_03825	FGSG_05082							FGSG_05425
FGSG_11977	FGSG_06877	FGSG_06404							FGSG_15657
FGSG_08988	FGSG_00998	FGSG_10296							FGSG_05874
FGSG_01245	FGSG_09827	FGSG_08554							FGSG_11737
FGSG_08567	FGSG_00561	FGSG_08573							FGSG_13024
FGSG_10787	FGSG_01229	FGSG_02906							FGSG_17600
FGSG_05997	FGSG_10002	FGSG_10276							FGSG_08077
FGSG_05501	FGSG_08857	FGSG_10875							FGSG_02624
FGSG_16377	FGSG_01461	FGSG_07948							FGSG_01330
FGSG_09035	FGSG_06532	FGSG_05458							FGSG_06373
FGSG_03168	FGSG_09451	FGSG_13064							FGSG_07441
FGSG_15773	FGSG_00358	FGSG_16362							FGSG_10170
FGSG_06209	FGSG_15134	FGSG_04171							FGSG_17146
FGSG_05132	FGSG_00886	FGSG_04583							FGSG_15580
FGSG_06474	FGSG_08145	FGSG_05733							FGSG_05170
FGSG_08857	FGSG_04313	FGSG_09844							FGSG_05630
FGSG_07233	FGSG_17474	FGSG_07473							FGSG_08844
FGSG_00450	FGSG_01268	FGSG_04134							FGSG_00314
FGSG_08564	FGSG_08678	FGSG_02474							FGSG_11597
FGSG_10810	FGSG_03143	FGSG_08290							FGSG_09503
FGSG_08266	FGSG_13873	FGSG_01887							FGSG_05917
FGSG_07282	FGSG_06159	FGSG_04434							FGSG_02137
FGSG_02479	FGSG_10162	FGSG_00455							FGSG_08506
FGSG_02262	FGSG_12472	FGSG_05997							FGSG_06724
FGSG_04068	FGSG_03803	FGSG_03639							FGSG_06804
FGSG_02138	FGSG_16229	FGSG_08747							FGSG_07554
FGSG_05425	FGSG_09204	FGSG_10193							FGSG_01387
FGSG_02279	FGSG_15120	FGSG_08343							FGSG_05042
FGSG_15657	FGSG_05235	FGSG_10853							FGSG_01421
FGSG_05874	FGSG_07948	FGSG_01199							FGSG_09864
FGSG_11737	FGSG_10677	FGSG_08973							FGSG_03311
FGSG_13024	FGSG_06905	FGSG_02783							FGSG_15018
FGSG_17600	FGSG_00360	FGSG_17049							FGSG_00538
FGSG_08077	FGSG_17257	FGSG_08567							FGSG_07315
FGSG_02624	FGSG_10372	FGSG_09796							FGSG_05296
FGSG_01330	FGSG_06561	FGSG_07495							FGSG_06805
FGSG_06373	FGSG_07438	FGSG_03422							FGSG_01394
FGSG_07441	FGSG_10075	FGSG_05843							FGSG_10049
FGSG_10170	FGSG_04083	FGSG_16979							FGSG_09250
FGSG_17146	FGSG_04548	FGSG_01236							FGSG_11828
FGSG_15580	FGSG_00763	FGSG_08613							FGSG_13449
FGSG_05170	FGSG_00397	FGSG_10034							FGSG_00491
FGSG_05630	FGSG_13024	FGSG_00637							FGSG_09612
FGSG_08844	FGSG_05285	FGSG_06825							FGSG_07929
FGSG_00314	FGSG_06728	FGSG_06203							FGSG_01686
FGSG_11597	FGSG_15464	FGSG_16536							FGSG_03189
FGSG_09503	FGSG_01974	FGSG_10787							FGSG_13111
FGSG_05917	FGSG_07303	FGSG_00900							FGSG_07329
FGSG_02137	FGSG_02114	FGSG_10138							FGSG_05903
FGSG_08506	FGSG_01200	FGSG_06532							FGSG_08333
FGSG_06724	FGSG_09035	FGSG_07174							FGSG_05631
FGSG_06804	FGSG_08788	FGSG_02028							FGSG_09891
FGSG_07554	FGSG_01499	FGSG_13121							FGSG_01236
FGSG_01387	FGSG_08834	FGSG_07873							FGSG_04152
FGSG_05042	FGSG_17013	FGSG_01177							FGSG_01134
FGSG_01421	FGSG_00855	FGSG_05282							FGSG_02762
FGSG_09864	FGSG_11033	FGSG_11936							FGSG_09733
FGSG_03311	FGSG_12187	FGSG_07285							FGSG_17623
FGSG_15018	FGSG_15064	FGSG_05784							FGSG_02497
FGSG_00538	FGSG_11845	FGSG_07438							FGSG_13378
FGSG_02672	FGSG_09890	FGSG_05440							FGSG_16031
FGSG_07315	FGSG_04919	FGSG_15842							FGSG_02019
FGSG_05296	FGSG_16608	FGSG_00955							FGSG_11825
FGSG_06805	FGSG_11190	FGSG_01826							FGSG_07347
FGSG_01394	FGSG_02474	FGSG_07679							FGSG_09321
FGSG_10049	FGSG_03180	FGSG_02416							FGSG_09817
FGSG_09250	FGSG_01134	FGSG_10297							FGSG_05320
FGSG_11828	FGSG_04070	FGSG_07458							FGSG_00997
FGSG_13449	FGSG_02216	FGSG_06664							FGSG_03402
FGSG_00491	FGSG_06220	FGSG_05222							FGSG_05598
FGSG_09612	FGSG_00469	FGSG_15999							FGSG_07000
FGSG_07929	FGSG_05193	FGSG_03244							FGSG_12869
FGSG_01686	FGSG_06337	FGSG_07938							FGSG_05409
FGSG_03189	FGSG_10092	FGSG_13330							FGSG_04745
FGSG_13111	FGSG_05454	FGSG_06724							FGSG_08494
FGSG_07329	FGSG_10779	FGSG_16059							FGSG_13641
FGSG_05903	FGSG_00898	FGSG_06905							FGSG_07337
FGSG_08333	FGSG_06804	FGSG_11977							FGSG_06683
FGSG_05631	FGSG_15073	FGSG_03715							FGSG_10255
FGSG_09891	FGSG_09547	FGSG_06344							FGSG_01222
FGSG_01236	FGSG_02125	FGSG_10636							FGSG_10424
FGSG_04152	FGSG_04704	FGSG_04548							FGSG_01314
FGSG_01134	FGSG_07281	FGSG_09012							FGSG_01857
FGSG_02762	FGSG_09412	FGSG_05026							FGSG_06575
FGSG_09733	FGSG_15018	FGSG_13729							FGSG_00610
FGSG_17623	FGSG_09455	FGSG_07059							FGSG_07874
FGSG_02497	FGSG_09094	FGSG_00286							FGSG_10776
FGSG_13378	FGSG_02025	FGSG_05046							FGSG_02100
FGSG_16031	FGSG_09039	FGSG_06204							FGSG_06414
FGSG_02019	FGSG_17630	FGSG_01228							FGSG_06273
FGSG_11825	FGSG_07209	FGSG_10387							FGSG_09400
FGSG_07347	FGSG_06389	FGSG_01866							FGSG_16608
FGSG_09321	FGSG_04824	FGSG_00610							FGSG_06803
FGSG_09817	FGSG_07347	FGSG_07233							FGSG_10373
FGSG_05320	FGSG_10303	FGSG_07608							FGSG_06927
FGSG_00997	FGSG_10875	FGSG_00524							FGSG_09890
FGSG_03402	FGSG_01950	FGSG_07205							FGSG_06947
FGSG_05598	FGSG_07929	FGSG_13024							FGSG_06204
FGSG_07000	FGSG_17465	FGSG_00367							FGSG_06159
FGSG_12869	FGSG_01627	FGSG_09778							FGSG_01026
FGSG_05409	FGSG_10034	FGSG_00861							FGSG_10157
FGSG_04745	FGSG_10058	FGSG_01134							FGSG_00637
FGSG_08494	FGSG_00655	FGSG_15002							FGSG_10152
FGSG_13641	FGSG_15960	FGSG_05176							FGSG_10239
FGSG_07337	FGSG_12184	FGSG_07377							FGSG_12997
FGSG_06683	FGSG_15353	FGSG_04020							FGSG_05530
FGSG_10255	FGSG_01705	FGSG_10239							FGSG_09380
FGSG_01222	FGSG_05917	FGSG_05072							FGSG_07428
FGSG_03432	FGSG_01487	FGSG_09928							FGSG_05235
FGSG_10424	FGSG_13531	FGSG_07536							FGSG_08550
FGSG_01314	FGSG_08769	FGSG_03312							FGSG_04410
FGSG_01857	FGSG_13615	FGSG_17722							FGSG_06277
FGSG_06575	FGSG_10272	FGSG_03687							FGSG_05481
FGSG_00610	FGSG_02426	FGSG_01085							FGSG_11285
FGSG_07874	FGSG_15104	FGSG_15814							FGSG_13869
FGSG_10776	FGSG_16807	FGSG_01160							FGSG_02707
FGSG_02100	FGSG_02699	FGSG_06318							FGSG_00286
FGSG_06414	FGSG_15729	FGSG_13931							FGSG_04309
FGSG_06273	FGSG_09669	FGSG_15771							FGSG_10864
FGSG_09400	FGSG_12110	FGSG_05481							FGSG_02606
FGSG_16608	FGSG_05323	FGSG_06277							FGSG_08459
FGSG_06803	FGSG_05082	FGSG_08550							FGSG_10738
FGSG_10373	FGSG_16683	FGSG_16834							FGSG_02025
FGSG_06927	FGSG_07874	FGSG_00712							FGSG_04171
FGSG_09890	FGSG_06909	FGSG_01226							FGSG_00376
FGSG_06947	FGSG_05037	FGSG_00762							FGSG_02049
FGSG_06204	FGSG_17510	FGSG_04485							FGSG_06035
FGSG_06159	FGSG_10600	FGSG_09295							FGSG_10092
FGSG_01026	FGSG_05194	FGSG_15984							FGSG_16581
FGSG_10157	FGSG_00286	FGSG_07299							FGSG_13729
FGSG_00637	FGSG_11946	FGSG_08621							FGSG_06167
FGSG_10152	FGSG_06633	FGSG_12214							FGSG_05314
FGSG_10239	FGSG_05409	FGSG_08333							FGSG_10592
FGSG_12997	FGSG_10051	FGSG_11098							FGSG_05169
FGSG_05530	FGSG_00986	FGSG_01068							FGSG_04656
FGSG_09380	FGSG_09171	FGSG_01279							FGSG_05480
FGSG_07428	FGSG_03518	FGSG_02049							FGSG_05843
FGSG_05235	FGSG_10258	FGSG_08986							FGSG_16973
FGSG_08550	FGSG_10304	FGSG_03946							FGSG_02571
FGSG_04410	FGSG_15301	FGSG_17055							FGSG_08435
FGSG_06277	FGSG_05714	FGSG_09400							FGSG_04125
FGSG_05481	FGSG_10049	FGSG_07211							FGSG_06678
FGSG_11285	FGSG_12683	FGSG_07000							FGSG_01765
FGSG_13869	FGSG_09353	FGSG_15064							FGSG_03157
FGSG_02707	FGSG_00609	FGSG_07088							FGSG_05072
FGSG_00286	FGSG_10157	FGSG_02481							FGSG_06664
FGSG_04309	FGSG_05042	FGSG_10200							FGSG_01462
FGSG_10864	FGSG_17280	FGSG_04510							FGSG_00505
FGSG_02606	FGSG_09330	FGSG_04923							FGSG_09952
FGSG_08459	FGSG_11741	FGSG_01131							FGSG_01377
FGSG_10738	FGSG_09220	FGSG_12680							FGSG_10939
FGSG_02025	FGSG_03365	FGSG_05987							FGSG_00353
FGSG_04171	FGSG_10959	FGSG_09978							FGSG_16281
FGSG_00376	FGSG_00466	FGSG_09980							FGSG_10843
FGSG_02049	FGSG_15745	FGSG_00285							FGSG_00731
FGSG_06035	FGSG_10160	FGSG_05956							FGSG_09266
FGSG_10092	FGSG_10152	FGSG_03999							FGSG_06166
FGSG_16581	FGSG_09610	FGSG_00538							FGSG_07122
FGSG_13729	FGSG_15580	FGSG_12178							FGSG_08941
FGSG_06167	FGSG_02386	FGSG_04125							FGSG_05998
FGSG_05314	FGSG_06871	FGSG_10231							FGSG_13717
FGSG_10592	FGSG_08790	FGSG_05714							FGSG_10920
FGSG_05169	FGSG_04410	FGSG_07275							FGSG_06224
FGSG_04656	FGSG_15757	FGSG_10142							FGSG_00510
FGSG_05480	FGSG_06564	FGSG_07892							FGSG_00822
FGSG_05843	FGSG_06204	FGSG_17510							FGSG_10739
FGSG_16973	FGSG_01962	FGSG_09456							FGSG_01624
FGSG_02571	FGSG_01329	FGSG_06575							FGSG_10770
FGSG_08435	FGSG_05733	FGSG_15106							FGSG_17023
FGSG_04125	FGSG_08593	FGSG_04979							FGSG_10086
FGSG_06678	FGSG_10531	FGSG_11888							FGSG_03296
FGSG_01765	FGSG_05614	FGSG_11074							FGSG_15437
FGSG_03157	FGSG_01702	FGSG_00898							FGSG_00434
FGSG_05072	FGSG_02030	FGSG_11332							FGSG_17013
FGSG_06664	FGSG_00680	FGSG_04107							FGSG_05535
FGSG_01462	FGSG_09684	FGSG_00466							FGSG_00303
FGSG_00505	FGSG_11597	FGSG_17280							FGSG_03847
FGSG_09952	FGSG_01236	FGSG_06955							FGSG_10817
FGSG_04603	FGSG_03245	FGSG_05001							FGSG_10080
FGSG_01377	FGSG_04002	FGSG_01200							FGSG_06886
FGSG_10939	FGSG_10753	FGSG_05727							FGSG_09381
FGSG_00353	FGSG_09303	FGSG_10963							FGSG_00886
FGSG_16281	FGSG_13084	FGSG_05175							FGSG_10352
FGSG_10843	FGSG_10355	FGSG_01164							FGSG_05222
FGSG_00731	FGSG_00576	FGSG_04104							FGSG_09878
FGSG_09266	FGSG_05868	FGSG_12292							FGSG_04979
FGSG_06166	FGSG_06929	FGSG_01627							FGSG_00849
FGSG_07122	FGSG_06344	FGSG_10373							FGSG_01250
FGSG_08941	FGSG_07165	FGSG_06891							FGSG_01653
FGSG_05998	FGSG_07269	FGSG_01129							FGSG_05653
FGSG_13717	FGSG_10885	FGSG_04152							FGSG_04732
FGSG_10920	FGSG_04245	FGSG_06864							FGSG_05198
FGSG_06224	FGSG_07299	FGSG_09252							FGSG_06427
FGSG_00510	FGSG_16917	FGSG_06150							FGSG_17628
FGSG_00822	FGSG_01555	FGSG_12134							FGSG_08452
FGSG_10739	FGSG_01123	FGSG_16445							FGSG_09223
FGSG_01624	FGSG_14010	FGSG_00859							FGSG_15056
FGSG_10770	FGSG_04744	FGSG_15916							FGSG_07101
FGSG_17023	FGSG_15721	FGSG_05193							FGSG_05737
FGSG_10086	FGSG_13534	FGSG_09155							FGSG_06506
FGSG_03296	FGSG_11099	FGSG_07107							FGSG_04107
FGSG_15437	FGSG_02083	FGSG_01870							FGSG_09967
FGSG_00434	FGSG_12829	FGSG_12519							FGSG_09531
FGSG_17013	FGSG_09817	FGSG_15657							FGSG_05665
FGSG_05535	FGSG_08674	FGSG_00489							FGSG_06115
FGSG_00303	FGSG_12506	FGSG_16462							FGSG_17235
FGSG_03847	FGSG_06440	FGSG_17718							FGSG_00762
FGSG_10817	FGSG_04979	FGSG_07117							FGSG_01015
FGSG_10080	FGSG_05737	FGSG_09596							FGSG_13137
FGSG_06886	FGSG_10206	FGSG_06215							FGSG_01757
FGSG_09381	FGSG_07285	FGSG_00495							FGSG_08769
FGSG_00886	FGSG_08574	FGSG_00325							FGSG_13046
FGSG_10352	FGSG_09966	FGSG_04119							FGSG_10875
FGSG_05222	FGSG_06115	FGSG_04070							FGSG_09165
FGSG_09878	FGSG_00390	FGSG_01386							FGSG_05845
FGSG_04979	FGSG_00610	FGSG_04884							FGSG_05183
FGSG_00849	FGSG_05132	FGSG_06220							FGSG_10306
FGSG_01250	FGSG_09613	FGSG_00729							FGSG_10887
FGSG_01653	FGSG_10366	FGSG_07054							FGSG_05727
FGSG_05653	FGSG_07588	FGSG_03700							FGSG_13782
FGSG_04732	FGSG_07329	FGSG_00549							FGSG_07890
FGSG_05198	FGSG_00603	FGSG_04091							FGSG_05777
FGSG_06427	FGSG_00859	FGSG_03630							FGSG_07426
FGSG_17628	FGSG_11088	FGSG_06886							FGSG_05282
FGSG_08452	FGSG_06990	FGSG_06627							FGSG_10362
FGSG_09223	FGSG_12846	FGSG_13396							FGSG_00524
FGSG_15056	FGSG_06061	FGSG_16845							FGSG_09934
FGSG_07101	FGSG_09952	FGSG_02353							FGSG_16728
FGSG_05737	FGSG_00453	FGSG_07007							FGSG_16003
FGSG_06506	FGSG_09494	FGSG_08063							FGSG_01311
FGSG_04107	FGSG_04922	FGSG_06744							FGSG_06282
FGSG_09967	FGSG_01135	FGSG_09432							FGSG_16445
FGSG_09531	FGSG_07393	FGSG_12737							FGSG_01414
FGSG_05665	FGSG_15456	FGSG_01277							FGSG_01059
FGSG_06115	FGSG_09556	FGSG_08444							FGSG_09443
FGSG_17235	FGSG_02443	FGSG_13615							FGSG_07873
FGSG_00762	FGSG_06550	FGSG_05730							FGSG_08930
FGSG_01015	FGSG_00199	FGSG_06551							FGSG_02782
FGSG_13137	FGSG_08440	FGSG_09250							FGSG_09158
FGSG_01757	FGSG_09366	FGSG_06091							FGSG_02233
FGSG_08769	FGSG_10817	FGSG_16973							FGSG_08444
FGSG_13046	FGSG_09830	FGSG_04002							FGSG_01200
FGSG_10875	FGSG_07191	FGSG_17577							FGSG_00500
FGSG_09165	FGSG_11063	FGSG_09494							FGSG_01386
FGSG_05845	FGSG_09217	FGSG_00491							FGSG_07564
FGSG_05183	FGSG_06897	FGSG_17708							FGSG_15013
FGSG_10306	FGSG_10738	FGSG_10300							FGSG_08851
FGSG_10887	FGSG_05175	FGSG_10312							FGSG_10403
FGSG_05727	FGSG_08949	FGSG_08769							FGSG_03079
FGSG_13782	FGSG_01870	FGSG_11005							FGSG_01135
FGSG_07890	FGSG_08550	FGSG_06000							FGSG_00687
FGSG_05777	FGSG_13289	FGSG_05267							FGSG_06577
FGSG_03072	FGSG_01326	FGSG_10354							FGSG_10116
FGSG_07426	FGSG_07873	FGSG_07188							FGSG_02083
FGSG_05282	FGSG_04240	FGSG_02001							FGSG_15771
FGSG_10362	FGSG_00955	FGSG_15680							FGSG_10531
FGSG_00524	FGSG_06328	FGSG_10272							FGSG_00271
FGSG_09934	FGSG_05001	FGSG_05998							FGSG_13535
FGSG_16728	FGSG_06469	FGSG_05355							FGSG_08543
FGSG_16003	FGSG_16568	FGSG_10677							FGSG_06087
FGSG_01311	FGSG_09928	FGSG_17023							FGSG_06108
FGSG_06282	FGSG_01343	FGSG_05425							FGSG_10721
FGSG_16445	FGSG_05282	FGSG_05045							FGSG_02007
FGSG_01414	FGSG_09505	FGSG_07380							FGSG_01164
FGSG_01059	FGSG_17182	FGSG_17542							FGSG_05035
FGSG_09443	FGSG_03597	FGSG_10503							FGSG_10389
FGSG_07873	FGSG_09998	FGSG_09966							FGSG_10532
FGSG_08930	FGSG_11757	FGSG_07148							FGSG_07281
FGSG_02782	FGSG_02707	FGSG_16387							FGSG_01160
FGSG_09158	FGSG_10737	FGSG_05630							FGSG_07999
FGSG_02233	FGSG_01848	FGSG_06527							FGSG_10299
FGSG_08444	FGSG_05594	FGSG_07281							FGSG_10940
FGSG_01200	FGSG_12691	FGSG_09530							FGSG_07600
FGSG_00500	FGSG_17323	FGSG_11749							FGSG_03994
FGSG_01386	FGSG_13136	FGSG_11618							FGSG_17722
FGSG_07564	FGSG_07999	FGSG_08949							FGSG_04273
FGSG_15013	FGSG_02784	FGSG_00505							FGSG_05371
FGSG_08851	FGSG_03915	FGSG_01360							FGSG_05255
FGSG_10403	FGSG_06955	FGSG_02092							FGSG_13630
FGSG_03079	FGSG_10138	FGSG_11940							FGSG_06408
FGSG_01135	FGSG_06822	FGSG_09967							FGSG_01217
FGSG_00687	FGSG_09503	FGSG_09862							FGSG_04285
FGSG_06577	FGSG_06150	FGSG_09230							FGSG_09778
FGSG_10116	FGSG_02544	FGSG_06800							FGSG_09895
FGSG_02083	FGSG_06060	FGSG_03452							FGSG_01123
FGSG_15771	FGSG_09733	FGSG_04112							FGSG_05379
FGSG_10531	FGSG_04640	FGSG_06947							FGSG_04067
FGSG_00271	FGSG_01215	FGSG_01172							FGSG_03494
FGSG_13535	FGSG_17532	FGSG_01191							FGSG_11946
FGSG_08543	FGSG_08253	FGSG_11045							FGSG_10893
FGSG_06087	FGSG_01351	FGSG_03847							FGSG_02795
FGSG_06108	FGSG_03766	FGSG_05729							FGSG_12846
FGSG_10721	FGSG_08386	FGSG_01329							FGSG_03448
FGSG_02007	FGSG_06154	FGSG_06413							FGSG_13084
FGSG_10990	FGSG_13257	FGSG_07329							FGSG_00424
FGSG_01164	FGSG_11939	FGSG_09556							FGSG_02012
FGSG_05035	FGSG_13046	FGSG_06751							FGSG_05943
FGSG_10389	FGSG_10276	FGSG_05907							FGSG_10769
FGSG_10532	FGSG_01695	FGSG_07347							FGSG_02738
FGSG_07281	FGSG_01094	FGSG_03072							FGSG_08644
FGSG_01160	FGSG_10832	FGSG_09739							FGSG_08548
FGSG_07999	FGSG_06864	FGSG_10962							FGSG_09815
FGSG_10299	FGSG_07027	FGSG_00047							FGSG_08573
FGSG_10940	FGSG_09862	FGSG_08386							FGSG_03569
FGSG_07600	FGSG_10609	FGSG_11820							FGSG_09403
FGSG_03994	FGSG_09044	FGSG_15409							FGSG_07414
FGSG_17722	FGSG_09522	FGSG_17235							FGSG_17510
FGSG_04273	FGSG_08677	FGSG_10299							FGSG_01470
FGSG_05371	FGSG_17610	FGSG_04072							FGSG_00646
FGSG_05255	FGSG_13189	FGSG_05903							FGSG_05194
FGSG_13630	FGSG_15139	FGSG_02720							FGSG_00603
FGSG_06408	FGSG_01345	FGSG_00018							FGSG_07054
FGSG_01217	FGSG_07631	FGSG_08674							FGSG_11940
FGSG_04285	FGSG_00857	FGSG_00609							FGSG_07288
FGSG_09778	FGSG_08850	FGSG_01094							FGSG_10503
FGSG_09895	FGSG_15897	FGSG_07970							FGSG_15296
FGSG_01123	FGSG_05232	FGSG_06818							FGSG_01627
FGSG_05379	FGSG_13367	FGSG_08773							FGSG_12182
FGSG_04067	FGSG_10316	FGSG_15008							FGSG_03695
FGSG_03494	FGSG_05845	FGSG_16515							FGSG_09762
FGSG_11946	FGSG_02414	FGSG_00416							FGSG_17324
FGSG_10893	FGSG_12690	FGSG_09308							FGSG_03846
FGSG_02795	FGSG_03914	FGSG_10848							FGSG_16171
FGSG_12846	FGSG_08564	FGSG_01301							FGSG_07031
FGSG_03448	FGSG_08467	FGSG_17042							FGSG_09281
FGSG_13084	FGSG_00538	FGSG_01418							FGSG_08920
FGSG_00424	FGSG_10746	FGSG_11623							FGSG_00466
FGSG_02012	FGSG_16154	FGSG_03971							FGSG_10078
FGSG_05943	FGSG_00644	FGSG_02974							FGSG_00686
FGSG_10769	FGSG_11019	FGSG_09775							FGSG_07393
FGSG_02738	FGSG_02131	FGSG_06560							FGSG_02784
FGSG_08644	FGSG_03017	FGSG_17660							FGSG_09768
FGSG_08548	FGSG_16267	FGSG_10064							FGSG_09230
FGSG_09815	FGSG_17678	FGSG_05845							FGSG_06508
FGSG_08573	FGSG_01314	FGSG_06877							FGSG_04483
FGSG_03569	FGSG_04920	FGSG_09893							FGSG_08687
FGSG_09827	FGSG_07961	FGSG_04260							FGSG_15007
FGSG_09403	FGSG_06398	FGSG_10907							FGSG_15883
FGSG_07414	FGSG_03248	FGSG_03476							FGSG_08273
FGSG_17510	FGSG_08554	FGSG_06577							FGSG_09522
FGSG_01470	FGSG_10297	FGSG_06767							FGSG_00840
FGSG_00646	FGSG_10129	FGSG_08678							FGSG_07861
FGSG_05194	FGSG_17334	FGSG_02785							FGSG_04370
FGSG_00603	FGSG_12040	FGSG_00409							FGSG_00175
FGSG_07054	FGSG_07428	FGSG_04788							FGSG_01229
FGSG_11940	FGSG_09016	FGSG_08633							FGSG_10272
FGSG_07288	FGSG_05156	FGSG_10967							FGSG_02783
FGSG_10503	FGSG_01377	FGSG_01326							FGSG_05778
FGSG_15296	FGSG_10403	FGSG_10832							FGSG_11697
FGSG_01627	FGSG_17372	FGSG_06731							FGSG_10286
FGSG_12182	FGSG_08907	FGSG_04554							FGSG_07402
FGSG_03695	FGSG_17381	FGSG_04071							FGSG_04243
FGSG_09762	FGSG_05255	FGSG_03285							FGSG_07384
FGSG_17324	FGSG_05291	FGSG_08078							FGSG_15025
FGSG_03846	FGSG_09891	FGSG_01361							FGSG_04070
FGSG_16171	FGSG_00822	FGSG_10737							FGSG_04032
FGSG_07031	FGSG_12178	FGSG_05377							FGSG_00857
FGSG_09281	FGSG_06736	FGSG_01330							FGSG_16147
FGSG_08920	FGSG_00756	FGSG_01183							FGSG_10959
FGSG_10420	FGSG_14016	FGSG_02036							FGSG_11300
FGSG_00466	FGSG_09580	FGSG_03427							FGSG_10387
FGSG_01693	FGSG_08351	FGSG_06189							FGSG_00442
FGSG_10078	FGSG_04574	FGSG_06715							FGSG_06344
FGSG_00686	FGSG_15604	FGSG_15296							FGSG_05677
FGSG_07393	FGSG_06104	FGSG_07874							FGSG_07040
FGSG_02784	FGSG_07117	FGSG_05107							FGSG_01523
FGSG_09768	FGSG_04171	FGSG_04074							FGSG_04575
FGSG_09230	FGSG_01943	FGSG_12731							FGSG_10312
FGSG_06508	FGSG_04637	FGSG_11828							FGSG_05355
FGSG_04483	FGSG_08847	FGSG_06383							FGSG_08440
FGSG_08687	FGSG_05727	FGSG_06288							FGSG_01329
FGSG_15007	FGSG_06508	FGSG_06934							FGSG_08549
FGSG_15883	FGSG_16275	FGSG_00740							FGSG_08986
FGSG_08273	FGSG_01414	FGSG_17214							FGSG_03333
FGSG_09522	FGSG_06288	FGSG_07597							FGSG_01219
FGSG_00840	FGSG_15106	FGSG_13601							FGSG_12764
FGSG_07861	FGSG_01387	FGSG_05315							FGSG_09078
FGSG_04370	FGSG_03783	FGSG_06658							FGSG_09610
FGSG_00175	FGSG_06730	FGSG_04661							FGSG_16979
FGSG_01229	FGSG_02785	FGSG_04068							FGSG_04286
FGSG_10272	FGSG_08206	FGSG_08739							FGSG_06897
FGSG_02783	FGSG_05903	FGSG_04251							FGSG_01316
FGSG_05778	FGSG_15999	FGSG_16025							FGSG_06051
FGSG_11697	FGSG_16194	FGSG_07929							FGSG_01926
FGSG_10286	FGSG_16266	FGSG_00500							FGSG_00306
FGSG_07402	FGSG_00840	FGSG_15527							FGSG_01119
FGSG_04243	FGSG_06035	FGSG_15960							FGSG_04012
FGSG_07384	FGSG_05222	FGSG_16147							FGSG_00746
FGSG_15025	FGSG_17618	FGSG_09289							FGSG_00855
FGSG_04070	FGSG_02571	FGSG_07562							FGSG_10216
FGSG_04032	FGSG_06082	FGSG_13321							FGSG_09500
FGSG_00857	FGSG_06767	FGSG_10067							FGSG_09432
FGSG_16147	FGSG_10286	FGSG_04582							FGSG_07458
FGSG_10959	FGSG_01569	FGSG_09612							FGSG_06843
FGSG_11300	FGSG_03212	FGSG_02403							FGSG_06372
FGSG_10387	FGSG_03831	FGSG_02782							FGSG_00515
FGSG_00442	FGSG_13729	FGSG_01135							FGSG_13072
FGSG_06344	FGSG_10170	FGSG_13641							FGSG_09491
FGSG_05677	FGSG_00271	FGSG_04232							FGSG_08398
FGSG_07040	FGSG_10115	FGSG_16171							FGSG_05193
FGSG_01523	FGSG_07059	FGSG_16032							FGSG_04473
FGSG_04575	FGSG_06017	FGSG_06164							FGSG_15897
FGSG_10312	FGSG_10549	FGSG_09197							FGSG_17381
FGSG_05355	FGSG_04119	FGSG_09505							FGSG_04485
FGSG_12451	FGSG_09703	FGSG_06154							FGSG_01136
FGSG_08440	FGSG_08266	FGSG_01505							FGSG_05852
FGSG_01329	FGSG_01160	FGSG_10617							FGSG_16460
FGSG_08549	FGSG_15845	FGSG_02641							FGSG_05937
FGSG_08986	FGSG_08613	FGSG_07956							FGSG_06385
FGSG_02861	FGSG_04732	FGSG_02658							FGSG_03581
FGSG_03333	FGSG_06385	FGSG_05854							FGSG_06720
FGSG_01219	FGSG_00338	FGSG_05942							FGSG_04119
FGSG_12764	FGSG_09502	FGSG_15570							FGSG_10906
FGSG_09078	FGSG_15543	FGSG_15034							FGSG_01887
FGSG_09610	FGSG_00904	FGSG_09165							FGSG_11623
FGSG_16979	FGSG_12380	FGSG_10078							FGSG_10114
FGSG_04286	FGSG_02108	FGSG_04234							FGSG_06203
FGSG_06897	FGSG_16515	FGSG_08404							FGSG_01915
FGSG_01316	FGSG_02355	FGSG_10066							FGSG_15960
FGSG_06051	FGSG_07088	FGSG_01414							FGSG_17511
FGSG_01926	FGSG_01315	FGSG_08692							FGSG_07073
FGSG_00306	FGSG_11977	FGSG_05643							FGSG_09465
FGSG_01119	FGSG_11623	FGSG_10901							FGSG_07412
FGSG_04012	FGSG_09921	FGSG_09878							FGSG_17289
FGSG_00746	FGSG_00642	FGSG_02240							FGSG_06784
FGSG_00855	FGSG_02624	FGSG_02320							FGSG_05729
FGSG_10216	FGSG_10387	FGSG_01450							FGSG_09313
FGSG_09500	FGSG_10721	FGSG_00438							FGSG_08467
FGSG_09432	FGSG_07528	FGSG_09613							FGSG_03502
FGSG_07458	FGSG_06427	FGSG_02342							FGSG_17679
FGSG_06843	FGSG_08333	FGSG_16606							FGSG_04560
FGSG_06372	FGSG_04152	FGSG_10752							FGSG_08448
FGSG_00515	FGSG_09878	FGSG_06302							FGSG_03427
FGSG_13072	FGSG_05937	FGSG_10223							FGSG_16387
FGSG_09491	FGSG_01226	FGSG_10219							FGSG_05310
FGSG_08398	FGSG_07674	FGSG_08969							FGSG_08386
FGSG_05193	FGSG_10150	FGSG_02496							FGSG_07528
FGSG_04473	FGSG_08995	FGSG_16610							FGSG_04985
FGSG_15897	FGSG_04035	FGSG_07257							FGSG_07165
FGSG_17381	FGSG_16198	FGSG_11023							FGSG_00955
FGSG_04485	FGSG_08792	FGSG_06414							FGSG_04182
FGSG_01136	FGSG_11174	FGSG_01768							FGSG_02339
FGSG_05852	FGSG_04125	FGSG_01499							FGSG_00360
FGSG_16460	FGSG_02073	FGSG_10952							FGSG_06464
FGSG_05937	FGSG_03520	FGSG_16006							FGSG_09852
FGSG_06385	FGSG_00997	FGSG_07250							FGSG_10822
FGSG_03581	FGSG_06277	FGSG_05291							FGSG_08850
FGSG_06720	FGSG_05738	FGSG_05737							FGSG_17266
FGSG_04119	FGSG_02135	FGSG_01343							FGSG_01437
FGSG_10906	FGSG_07288	FGSG_05530							FGSG_07174
FGSG_01887	FGSG_11229	FGSG_08337							FGSG_00367
FGSG_11623	FGSG_09967	FGSG_10769							FGSG_07562
FGSG_10114	FGSG_04558	FGSG_13871							FGSG_16914
FGSG_06203	FGSG_15025	FGSG_07152							FGSG_06240
FGSG_01915	FGSG_15933	FGSG_06273							FGSG_15409
FGSG_15960	FGSG_11003	FGSG_16914							FGSG_07380
FGSG_17511	FGSG_15575	FGSG_11658							FGSG_16515
FGSG_07073	FGSG_09266	FGSG_09815							FGSG_12739
FGSG_09465	FGSG_06938	FGSG_04283							FGSG_08976
FGSG_07412	FGSG_17337	FGSG_09271							FGSG_08338
FGSG_17289	FGSG_01129	FGSG_05842							FGSG_09014
FGSG_06784	FGSG_05625	FGSG_17324							FGSG_06073
FGSG_05729	FGSG_11955	FGSG_16862							FGSG_08944
FGSG_09313	FGSG_05428	FGSG_07255							FGSG_10232
FGSG_08467	FGSG_02795	FGSG_01387							FGSG_03803
FGSG_03502	FGSG_05355	FGSG_03212							FGSG_00729
FGSG_17679	FGSG_13310	FGSG_02764							FGSG_02477
FGSG_04560	FGSG_17232	FGSG_01902							FGSG_11820
FGSG_08448	FGSG_10167	FGSG_02624							FGSG_09505
FGSG_03427	FGSG_10822	FGSG_02918							FGSG_01975
FGSG_16387	FGSG_04983	FGSG_01358							FGSG_06064
FGSG_05310	FGSG_04067	FGSG_03804							FGSG_05023
FGSG_08386	FGSG_06927	FGSG_09217							FGSG_09456
FGSG_07528	FGSG_01191	FGSG_10864							FGSG_04884
FGSG_04985	FGSG_10118	FGSG_04058							FGSG_10542
FGSG_07165	FGSG_14018	FGSG_06045							FGSG_10320
FGSG_00955	FGSG_06857	FGSG_09100							FGSG_05721
FGSG_04182	FGSG_01325	FGSG_09531							FGSG_00549
FGSG_02339	FGSG_10386	FGSG_06852							FGSG_06681
FGSG_00360	FGSG_10389	FGSG_06996							FGSG_10034
FGSG_06464	FGSG_13094	FGSG_13110							FGSG_00677
FGSG_09852	FGSG_02375	FGSG_00306							FGSG_13064
FGSG_10822	FGSG_06947	FGSG_03375							FGSG_08504
FGSG_08850	FGSG_05267	FGSG_01059							FGSG_05956
FGSG_17266	FGSG_04884	FGSG_07183							FGSG_10167
FGSG_01437	FGSG_08621	FGSG_09934							FGSG_01877
FGSG_07174	FGSG_07182	FGSG_09890							FGSG_01085
FGSG_00367	FGSG_07107	FGSG_01487							FGSG_10066
FGSG_07562	FGSG_09834	FGSG_10048							FGSG_03335
FGSG_16914	FGSG_05440	FGSG_13136							FGSG_13616
FGSG_06240	FGSG_05848	FGSG_08774							FGSG_07956
FGSG_15409	FGSG_02087	FGSG_10366							FGSG_02287
FGSG_07380	FGSG_05998	FGSG_06590							FGSG_00276
FGSG_16515	FGSG_10239	FGSG_06935							FGSG_05117
FGSG_12739	FGSG_13560	FGSG_10206							FGSG_08788
FGSG_08976	FGSG_08573	FGSG_05226							FGSG_05108
FGSG_08338	FGSG_01031	FGSG_01437							FGSG_07241
FGSG_09014	FGSG_06805	FGSG_11129							FGSG_17223
FGSG_06073	FGSG_16667	FGSG_09988							FGSG_01924
FGSG_08944	FGSG_17670	FGSG_03835							FGSG_07970
FGSG_10232	FGSG_01111	FGSG_10304							FGSG_16667
FGSG_03803	FGSG_08689	FGSG_07234							FGSG_09341
FGSG_00729	FGSG_16031	FGSG_00387							FGSG_07608
FGSG_02477	FGSG_02783	FGSG_13053							FGSG_09722
FGSG_11820	FGSG_06290	FGSG_00677							FGSG_10077
FGSG_09505	FGSG_01249	FGSG_01415							FGSG_05003
FGSG_01975	FGSG_17660	FGSG_05198							FGSG_04202
FGSG_06064	FGSG_06166	FGSG_04512							FGSG_06313
FGSG_05023	FGSG_08065	FGSG_09891							FGSG_09535
FGSG_09456	FGSG_09321	FGSG_03792							FGSG_04237
FGSG_04884	FGSG_05154	FGSG_00589							FGSG_15873
FGSG_10542	FGSG_01177	FGSG_02364							FGSG_06415
FGSG_10320	FGSG_06711	FGSG_07016							FGSG_08551
FGSG_05721	FGSG_02049	FGSG_08864							FGSG_09429
FGSG_00549	FGSG_16845	FGSG_06730							FGSG_06023
FGSG_06681	FGSG_15089	FGSG_04124							FGSG_15565
FGSG_10034	FGSG_02779	FGSG_16300							FGSG_06800
FGSG_00677	FGSG_06043	FGSG_10157							FGSG_06177
FGSG_11025	FGSG_06993	FGSG_07334							FGSG_09775
FGSG_13064	FGSG_09760	FGSG_10308							FGSG_11961
FGSG_08504	FGSG_07257	FGSG_10114							FGSG_01226
FGSG_05956	FGSG_06414	FGSG_01743							FGSG_09002
FGSG_10167	FGSG_09313	FGSG_13534							FGSG_01648
FGSG_01877	FGSG_16610	FGSG_05300							FGSG_05384
FGSG_01085	FGSG_08941	FGSG_15025							FGSG_01349
FGSG_10066	FGSG_17388	FGSG_17002							FGSG_15814
FGSG_03335	FGSG_11970	FGSG_11737							FGSG_01129
FGSG_13616	FGSG_01887	FGSG_04306							FGSG_09555
FGSG_07956	FGSG_09978	FGSG_01119							FGSG_12937
FGSG_02287	FGSG_09341	FGSG_07862							FGSG_04570
FGSG_00276	FGSG_09072	FGSG_13685							FGSG_02974
FGSG_05117	FGSG_08393	FGSG_12469							FGSG_09760
FGSG_08788	FGSG_11045	FGSG_03033							FGSG_07180
FGSG_05108	FGSG_07473	FGSG_08858							FGSG_08310
FGSG_07241	FGSG_05777	FGSG_10934							FGSG_17618
FGSG_17223	FGSG_02697	FGSG_01000							FGSG_00472
FGSG_01924	FGSG_16462	FGSG_05171							FGSG_15721
FGSG_07970	FGSG_07122	FGSG_02516							FGSG_09552
FGSG_16667	FGSG_03009	FGSG_08599							FGSG_12178
FGSG_09341	FGSG_09815	FGSG_05156							FGSG_05187
FGSG_07608	FGSG_01587	FGSG_08617							FGSG_04091
FGSG_09722	FGSG_07711	FGSG_00271							FGSG_02231
FGSG_10077	FGSG_10312	FGSG_02762							FGSG_05377
FGSG_05003	FGSG_09042	FGSG_02952							FGSG_01487
FGSG_04202	FGSG_17628	FGSG_08506							FGSG_08758
FGSG_06313	FGSG_10231	FGSG_07596							FGSG_15874
FGSG_09535	FGSG_00597	FGSG_02606							FGSG_03212
FGSG_13954	FGSG_04897	FGSG_06119							FGSG_10005
FGSG_04237	FGSG_09295	FGSG_03344							FGSG_17666
FGSG_15873	FGSG_06059	FGSG_16377							FGSG_08690
FGSG_06415	FGSG_01279	FGSG_10115							FGSG_07107
FGSG_08551	FGSG_09281	FGSG_04370							FGSG_12154
FGSG_09429	FGSG_16958	FGSG_09845							FGSG_06290
FGSG_06023	FGSG_00505	FGSG_02795							FGSG_06394
FGSG_15565	FGSG_06014	FGSG_09641							FGSG_07475
FGSG_06800	FGSG_10320	FGSG_16807							FGSG_15002
FGSG_06177	FGSG_02821	FGSG_03510							FGSG_04413
FGSG_09775	FGSG_08922	FGSG_06385							FGSG_00260
FGSG_11961	FGSG_08773	FGSG_07113							FGSG_06634
FGSG_10617	FGSG_02007	FGSG_10116							FGSG_04906
FGSG_01226	FGSG_11940	FGSG_09970							FGSG_04805
FGSG_09002	FGSG_09316	FGSG_08736							FGSG_10908
FGSG_01648	FGSG_06920	FGSG_00219							FGSG_09662
FGSG_05384	FGSG_01404	FGSG_05917							FGSG_00328
FGSG_01349	FGSG_10313	FGSG_05632							FGSG_09689
FGSG_15814	FGSG_06273	FGSG_07322							FGSG_04196
FGSG_01129	FGSG_10219	FGSG_10144							FGSG_07041
FGSG_09555	FGSG_05108	FGSG_01345							FGSG_08449
FGSG_12937	FGSG_09530	FGSG_04222							FGSG_00969
FGSG_04570	FGSG_03992	FGSG_13979							FGSG_07088
FGSG_02974	FGSG_01376	FGSG_10268							FGSG_08907
FGSG_09760	FGSG_13169	FGSG_09776							FGSG_01872
FGSG_07180	FGSG_00637	FGSG_01574							FGSG_16829
FGSG_08310	FGSG_10363	FGSG_00562							FGSG_12726
FGSG_17618	FGSG_05831	FGSG_01394							FGSG_00589
FGSG_00472	FGSG_05729	FGSG_10077							FGSG_07069
FGSG_15721	FGSG_15368	FGSG_04032							FGSG_07251
FGSG_09552	FGSG_09501	FGSG_09767							FGSG_00392
FGSG_12178	FGSG_08460	FGSG_02083							FGSG_00714
FGSG_05187	FGSG_00279	FGSG_11480							FGSG_02771
FGSG_04091	FGSG_10796	FGSG_10013							FGSG_12134
FGSG_02231	FGSG_02762	FGSG_01052							FGSG_05156
FGSG_05377	FGSG_03281	FGSG_13964							FGSG_17718
FGSG_01487	FGSG_05089	FGSG_11913							FGSG_04914
FGSG_08758	FGSG_00175	FGSG_04413							FGSG_01230
FGSG_15874	FGSG_15771	FGSG_03189							FGSG_06335
FGSG_03212	FGSG_00515	FGSG_00317							FGSG_04112
FGSG_10005	FGSG_10963	FGSG_07832							FGSG_06045
FGSG_17666	FGSG_09045	FGSG_16034							FGSG_06767
FGSG_08690	FGSG_06886	FGSG_05977							FGSG_03191
FGSG_07107	FGSG_15002	FGSG_09630							FGSG_00818
FGSG_12154	FGSG_09844	FGSG_06920							FGSG_13502
FGSG_06290	FGSG_07441	FGSG_07890							FGSG_15494
FGSG_06394	FGSG_07334	FGSG_02004							FGSG_17577
FGSG_11409	FGSG_01083	FGSG_05778							FGSG_07019
FGSG_07475	FGSG_02496	FGSG_01242							FGSG_01191
FGSG_15002	FGSG_15766	FGSG_08440							FGSG_09908
FGSG_04413	FGSG_16937	FGSG_03150							FGSG_08800
FGSG_00260	FGSG_08495	FGSG_06372							FGSG_05250
FGSG_06634	FGSG_05447	FGSG_09381							FGSG_06043
FGSG_04906	FGSG_10506	FGSG_02272							FGSG_06705
FGSG_04805	FGSG_06560	FGSG_04402							FGSG_01746
FGSG_10908	FGSG_08532	FGSG_06804							FGSG_05436
FGSG_09662	FGSG_08529	FGSG_15580							FGSG_01499
FGSG_00328	FGSG_15286	FGSG_09952							FGSG_07938
FGSG_09689	FGSG_00184	FGSG_10352							FGSG_03344
FGSG_04196	FGSG_04072	FGSG_10721							FGSG_16402
FGSG_07041	FGSG_16826	FGSG_15735							FGSG_06072
FGSG_08449	FGSG_17032	FGSG_00904							FGSG_05578
FGSG_00969	FGSG_15873	FGSG_08944							FGSG_06383
FGSG_07088	FGSG_09554	FGSG_05057							FGSG_12669
FGSG_08907	FGSG_13703	FGSG_10306							FGSG_03708
FGSG_01872	FGSG_00325	FGSG_16520							FGSG_02481
FGSG_16829	FGSG_15927	FGSG_06805							FGSG_15688
FGSG_12726	FGSG_03802	FGSG_08988							FGSG_03999
FGSG_00589	FGSG_08926	FGSG_05874							FGSG_04104
FGSG_07069	FGSG_02720	FGSG_00390							FGSG_12975
FGSG_07251	FGSG_09041	FGSG_00279							FGSG_05932
FGSG_00392	FGSG_05384	FGSG_08809							FGSG_04003
FGSG_00714	FGSG_10940	FGSG_01324							FGSG_02098
FGSG_02771	FGSG_05620	FGSG_00648							FGSG_09978
FGSG_12134	FGSG_09618	FGSG_09455							FGSG_16604
FGSG_05156	FGSG_05908	FGSG_16994							FGSG_08495
FGSG_17718	FGSG_07082	FGSG_01203							FGSG_00317
FGSG_04914	FGSG_08494	FGSG_09783							FGSG_05176
FGSG_01230	FGSG_04107	FGSG_00376							FGSG_04910
FGSG_06335	FGSG_06318	FGSG_07087							FGSG_10180
FGSG_04112	FGSG_06359	FGSG_00746							FGSG_08342
FGSG_06045	FGSG_09796	FGSG_12997							FGSG_07016
FGSG_06767	FGSG_01394	FGSG_09422							FGSG_04072
FGSG_03191	FGSG_11127	FGSG_16494							FGSG_11617
FGSG_00818	FGSG_11348	FGSG_09852							FGSG_09042
FGSG_10587	FGSG_15157	FGSG_09316							FGSG_17593
FGSG_13502	FGSG_01059	FGSG_01617							FGSG_04326
FGSG_15494	FGSG_07414	FGSG_01020							FGSG_07925
FGSG_17577	FGSG_10888	FGSG_01317							FGSG_08712
FGSG_07019	FGSG_01360	FGSG_08336							FGSG_03365
FGSG_01191	FGSG_05778	FGSG_09734							FGSG_02247
FGSG_09908	FGSG_02667	FGSG_09421							FGSG_09340
FGSG_08800	FGSG_08310	FGSG_05211							FGSG_09783
FGSG_05250	FGSG_05379	FGSG_10150							FGSG_10967
FGSG_06043	FGSG_00560	FGSG_05863							FGSG_13053
FGSG_06705	FGSG_10603	FGSG_05215							FGSG_00529
FGSG_01746	FGSG_07807	FGSG_04911							FGSG_07259
FGSG_05436	FGSG_00136	FGSG_04481							FGSG_12908
FGSG_01499	FGSG_02498	FGSG_08865							FGSG_08599
FGSG_07938	FGSG_06120	FGSG_02967							FGSG_07952
FGSG_03344	FGSG_11443	FGSG_13713							FGSG_09893
FGSG_16402	FGSG_06506	FGSG_02784							FGSG_10138
FGSG_06072	FGSG_04105	FGSG_09435							FGSG_09421
FGSG_05578	FGSG_17511	FGSG_09380							FGSG_01768
FGSG_03369	FGSG_16007	FGSG_10522							FGSG_06819
FGSG_06383	FGSG_09773	FGSG_00560							FGSG_15095
FGSG_12669	FGSG_13247	FGSG_05436							FGSG_13380
FGSG_03708	FGSG_10078	FGSG_04202							FGSG_06796
FGSG_02481	FGSG_08458	FGSG_09764							FGSG_10963
FGSG_15688	FGSG_15006	FGSG_16715							FGSG_07201
FGSG_03999	FGSG_07956	FGSG_08292							FGSG_05315
FGSG_04104	FGSG_09935	FGSG_03581							FGSG_09970
FGSG_12975	FGSG_07087	FGSG_16391							FGSG_05171
FGSG_05932	FGSG_16773	FGSG_03270							FGSG_01072
FGSG_04003	FGSG_01438	FGSG_09035							FGSG_05908
FGSG_02098	FGSG_06302	FGSG_11961							FGSG_15024
FGSG_09978	FGSG_05125	FGSG_10167							FGSG_05447
FGSG_16604	FGSG_09158	FGSG_13906							FGSG_17044
FGSG_09390	FGSG_05863	FGSG_04487							FGSG_10400
FGSG_08495	FGSG_16329	FGSG_07160							FGSG_01152
FGSG_00317	FGSG_02634	FGSG_06938							FGSG_06627
FGSG_05176	FGSG_09641	FGSG_00818							FGSG_12839
FGSG_04910	FGSG_01119	FGSG_04286							FGSG_06406
FGSG_10180	FGSG_04575	FGSG_02007							FGSG_02901
FGSG_08342	FGSG_09560	FGSG_07057							FGSG_08336
FGSG_07016	FGSG_07090	FGSG_08548							FGSG_01392
FGSG_04072	FGSG_07938	FGSG_06644							FGSG_01334
FGSG_11617	FGSG_15916	FGSG_10075							FGSG_07224
FGSG_09042	FGSG_03847	FGSG_00731							FGSG_11858
FGSG_17593	FGSG_10864	FGSG_01747							FGSG_06164
FGSG_04326	FGSG_03426	FGSG_01316							FGSG_08995
FGSG_07925	FGSG_05834	FGSG_04054							FGSG_09773
FGSG_08712	FGSG_06627	FGSG_04640							FGSG_16610
FGSG_03365	FGSG_04525	FGSG_15007							FGSG_15767
FGSG_02247	FGSG_06935	FGSG_05614							FGSG_03452
FGSG_09340	FGSG_06649	FGSG_04317							FGSG_02355
FGSG_09783	FGSG_04485	FGSG_10355							FGSG_03590
FGSG_10967	FGSG_06549	FGSG_11398							FGSG_05471
FGSG_13053	FGSG_02117	FGSG_00377							FGSG_01552
FGSG_00529	FGSG_10821	FGSG_04910							FGSG_15729
FGSG_07259	FGSG_01358	FGSG_15003							FGSG_05593
FGSG_12908	FGSG_05997	FGSG_01605							FGSG_01946
FGSG_08599	FGSG_08696	FGSG_05075							FGSG_09718
FGSG_07952	FGSG_02556	FGSG_15006							FGSG_10382
FGSG_09893	FGSG_16034	FGSG_05314							FGSG_08063
FGSG_10138	FGSG_00367	FGSG_07182							FGSG_09757
FGSG_09421	FGSG_06548	FGSG_05637							FGSG_06675
FGSG_01768	FGSG_02721	FGSG_01369							FGSG_15665
FGSG_06819	FGSG_04985	FGSG_07201							FGSG_02697
FGSG_15095	FGSG_08644	FGSG_01624							FGSG_06527
FGSG_09335	FGSG_04454	FGSG_05912							FGSG_09927
FGSG_13380	FGSG_11651	FGSG_09618							FGSG_08706
FGSG_06796	FGSG_10241	FGSG_08546							FGSG_16798
FGSG_10963	FGSG_09852	FGSG_10893							FGSG_07250
FGSG_07201	FGSG_00328	FGSG_05890							FGSG_03520
FGSG_05315	FGSG_04610	FGSG_04288							FGSG_04998
FGSG_09970	FGSG_07101	FGSG_07436							FGSG_02810
FGSG_05171	FGSG_05501	FGSG_01940							FGSG_03770
FGSG_01072	FGSG_05057	FGSG_07129							FGSG_11931
FGSG_05908	FGSG_08489	FGSG_05625							FGSG_01363
FGSG_15024	FGSG_08825	FGSG_09669							FGSG_04567
FGSG_05447	FGSG_12012	FGSG_01462							FGSG_08774
FGSG_17044	FGSG_10934	FGSG_10118							FGSG_06165
FGSG_10400	FGSG_09531	FGSG_16229							FGSG_05029
FGSG_01152	FGSG_08551	FGSG_16217							FGSG_10270
FGSG_06627	FGSG_06678	FGSG_06333							FGSG_09613
FGSG_12839	FGSG_06353	FGSG_07417							FGSG_16034
FGSG_06406	FGSG_10265	FGSG_01848							FGSG_01277
FGSG_02901	FGSG_07310	FGSG_01070							FGSG_10013
FGSG_08336	FGSG_07952	FGSG_02936							FGSG_04540
FGSG_01392	FGSG_17146	FGSG_03442							FGSG_01155
FGSG_01334	FGSG_03529	FGSG_06224							FGSG_09703
FGSG_07224	FGSG_01044	FGSG_12975							FGSG_10907
FGSG_11858	FGSG_11495	FGSG_01198							FGSG_01290
FGSG_06164	FGSG_03125	FGSG_06246							FGSG_06112
FGSG_08995	FGSG_09422	FGSG_09457							FGSG_09271
FGSG_09773	FGSG_06167	FGSG_17146							FGSG_01940
FGSG_16610	FGSG_11052	FGSG_01552							FGSG_00288
FGSG_15767	FGSG_00588	FGSG_01098							FGSG_08421
FGSG_03452	FGSG_02606	FGSG_03692							FGSG_08971
FGSG_02355	FGSG_07315	FGSG_03245							FGSG_13017
FGSG_03590	FGSG_07121	FGSG_08987							FGSG_06647
FGSG_05471	FGSG_06415	FGSG_01596							FGSG_09877
FGSG_01552	FGSG_04611	FGSG_06290							FGSG_00641
FGSG_15729	FGSG_12997	FGSG_05008							FGSG_00872
FGSG_05593	FGSG_17247	FGSG_05316							FGSG_07477
FGSG_01946	FGSG_10470	FGSG_04927							FGSG_02828
FGSG_09718	FGSG_09778	FGSG_09357							FGSG_07395
FGSG_10382	FGSG_10066	FGSG_00369							FGSG_00558
FGSG_08063	FGSG_09083	FGSG_05294							FGSG_03957
FGSG_09757	FGSG_15014	FGSG_04326							FGSG_16520
FGSG_06675	FGSG_07176	FGSG_08015							FGSG_10962
FGSG_15665	FGSG_04810	FGSG_03960							FGSG_16166
FGSG_02697	FGSG_17424	FGSG_01447							FGSG_10140
FGSG_06527	FGSG_08337	FGSG_02522							FGSG_09382
FGSG_09927	FGSG_08138	FGSG_02443							FGSG_01086
FGSG_08706	FGSG_00677	FGSG_05132							FGSG_12731
FGSG_16798	FGSG_09612	FGSG_06177							FGSG_03700
FGSG_07250	FGSG_09526	FGSG_12898							FGSG_00387
FGSG_03520	FGSG_02481	FGSG_05187							FGSG_01020
FGSG_04998	FGSG_16973	FGSG_01125							FGSG_10067
FGSG_02810	FGSG_11219	FGSG_08800							FGSG_03766
FGSG_03770	FGSG_00389	FGSG_17679							FGSG_16568
FGSG_11931	FGSG_00731	FGSG_05154							FGSG_09694
FGSG_01363	FGSG_12188	FGSG_09691							FGSG_10846
FGSG_04567	FGSG_13679	FGSG_00243							FGSG_06333
FGSG_08774	FGSG_00201	FGSG_05554							FGSG_05977
FGSG_06165	FGSG_05874	FGSG_10592							FGSG_03211
FGSG_05029	FGSG_07183	FGSG_07176							FGSG_06376
FGSG_10270	FGSG_16281	FGSG_01455							FGSG_16804
FGSG_09613	FGSG_08851	FGSG_04567							FGSG_09533
FGSG_16034	FGSG_08244	FGSG_03770							FGSG_16595
FGSG_01277	FGSG_17718	FGSG_15927							FGSG_13612
FGSG_10013	FGSG_03836	FGSG_11959							FGSG_01605
FGSG_04540	FGSG_09877	FGSG_00714							FGSG_09204
FGSG_01155	FGSG_15814	FGSG_05681							FGSG_01068
FGSG_09703	FGSG_05653	FGSG_02697							FGSG_04134
FGSG_10907	FGSG_07496	FGSG_10035							FGSG_10144
FGSG_01290	FGSG_02782	FGSG_08932							FGSG_10497
FGSG_06112	FGSG_12347	FGSG_02822							FGSG_01328
FGSG_09271	FGSG_10373	FGSG_04478							FGSG_07237
FGSG_01940	FGSG_01164	FGSG_16017							FGSG_08485
FGSG_00288	FGSG_01000	FGSG_05488							FGSG_09643
FGSG_08421	FGSG_01245	FGSG_17006							FGSG_07322
FGSG_08971	FGSG_01508	FGSG_02722							FGSG_15766
FGSG_13017	FGSG_02233	FGSG_01884							FGSG_09641
FGSG_06647	FGSG_05907	FGSG_10049							FGSG_06877
FGSG_09877	FGSG_03835	FGSG_10899							FGSG_10211
FGSG_00641	FGSG_04112	FGSG_08682							FGSG_06822
FGSG_00872	FGSG_09250	FGSG_05093							FGSG_15008
FGSG_07477	FGSG_03497	FGSG_09500							FGSG_11596
FGSG_02828	FGSG_09734	FGSG_00442							FGSG_06644
FGSG_07395	FGSG_17708	FGSG_10382							FGSG_10744
FGSG_00558	FGSG_12531	FGSG_02225							FGSG_16017
FGSG_03957	FGSG_10382	FGSG_08817							FGSG_02976
FGSG_16520	FGSG_03189	FGSG_07366							FGSG_00476
FGSG_10962	FGSG_15807	FGSG_01100							FGSG_01131
FGSG_16166	FGSG_08435	FGSG_08834							FGSG_01464
FGSG_10140	FGSG_01572	FGSG_10050							FGSG_09650
FGSG_09382	FGSG_01489	FGSG_17043							FGSG_17660
FGSG_01086	FGSG_06394	FGSG_09340							FGSG_01201
FGSG_12731	FGSG_00317	FGSG_04081							FGSG_06701
FGSG_03700	FGSG_05408	FGSG_08342							FGSG_10129
FGSG_00387	FGSG_05530	FGSG_15766							FGSG_09249
FGSG_01020	FGSG_10613	FGSG_10883							FGSG_08617
FGSG_10067	FGSG_02828	FGSG_01356							FGSG_07946
FGSG_03766	FGSG_09165	FGSG_00559							FGSG_00620
FGSG_16568	FGSG_03999	FGSG_06678							FGSG_17268
FGSG_09694	FGSG_15741	FGSG_15134							FGSG_02352
FGSG_10846	FGSG_04570	FGSG_00997							FGSG_04161
FGSG_06333	FGSG_05225	FGSG_10005							FGSG_01574
FGSG_05977	FGSG_04232	FGSG_12669							FGSG_05140
FGSG_03211	FGSG_06546	FGSG_13426							FGSG_06309
FGSG_06376	FGSG_16464	FGSG_16460							FGSG_09669
FGSG_16804	FGSG_06294	FGSG_10218							FGSG_12388
FGSG_09533	FGSG_08973	FGSG_09703							FGSG_06920
FGSG_16595	FGSG_02839	FGSG_01219							FGSG_01268
FGSG_04378	FGSG_00969	FGSG_04273							FGSG_09185
FGSG_13612	FGSG_07660	FGSG_01965							FGSG_04582
FGSG_01605	FGSG_13515	FGSG_10347							FGSG_07310
FGSG_09204	FGSG_16830	FGSG_06163							FGSG_00388
FGSG_01068	FGSG_04746	FGSG_00901							FGSG_09958
FGSG_04134	FGSG_01447	FGSG_09748							FGSG_01588
FGSG_10144	FGSG_11112	FGSG_06760							FGSG_05863
FGSG_10497	FGSG_09432	FGSG_01744							FGSG_08621
FGSG_01328	FGSG_08986	FGSG_01633							FGSG_06730
FGSG_07237	FGSG_08292	FGSG_00424							FGSG_16715
FGSG_08485	FGSG_04390	FGSG_15745							FGSG_16737
FGSG_09643	FGSG_11208	FGSG_06464							FGSG_09623
FGSG_07322	FGSG_03598	FGSG_09877							FGSG_09217
FGSG_15766	FGSG_04273	FGSG_09281							FGSG_01455
FGSG_09641	FGSG_02846	FGSG_03168							FGSG_05430
FGSG_06877	FGSG_11967	FGSG_09535							FGSG_12209
FGSG_10211	FGSG_05211	FGSG_01373							FGSG_01670
FGSG_06822	FGSG_07045	FGSG_12442							FGSG_05292
FGSG_15008	FGSG_10527	FGSG_04528							FGSG_08696
FGSG_11596	FGSG_11961	FGSG_06282							FGSG_17359
FGSG_06644	FGSG_16751	FGSG_12418							FGSG_12380
FGSG_10744	FGSG_08961	FGSG_03079							FGSG_03968
FGSG_16017	FGSG_10560	FGSG_12764							FGSG_10821
FGSG_02976	FGSG_12731	FGSG_08971							FGSG_04927
FGSG_00476	FGSG_15056	FGSG_09140							FGSG_02289
FGSG_01131	FGSG_09268	FGSG_09853							FGSG_09392
FGSG_01464	FGSG_08619	FGSG_07310							FGSG_08529
FGSG_09650	FGSG_15665	FGSG_05117							FGSG_16686
FGSG_17660	FGSG_09972	FGSG_06313							FGSG_08429
FGSG_01201	FGSG_06744	FGSG_10817							FGSG_05495
FGSG_06701	FGSG_05377	FGSG_01464							FGSG_09512
FGSG_10129	FGSG_09365	FGSG_17139							FGSG_05974
FGSG_09249	FGSG_07741	FGSG_06024							FGSG_06302
FGSG_03467	FGSG_06224	FGSG_06167							FGSG_09833
FGSG_08617	FGSG_11000	FGSG_12839							FGSG_07331
FGSG_07946	FGSG_16176	FGSG_09204							FGSG_05070
FGSG_00620	FGSG_02400	FGSG_05108							FGSG_04401
FGSG_17268	FGSG_03172	FGSG_15139							FGSG_17099
FGSG_02352	FGSG_08988	FGSG_15873							FGSG_03184
FGSG_04161	FGSG_06818	FGSG_07302							FGSG_07113
FGSG_01574	FGSG_01277	FGSG_04309							FGSG_12376
FGSG_05140	FGSG_06165	FGSG_07917							FGSG_01094
FGSG_06309	FGSG_06313	FGSG_07447							FGSG_16957
FGSG_09669	FGSG_00585	FGSG_05600							FGSG_08865
FGSG_12388	FGSG_12388	FGSG_10497							FGSG_09289
FGSG_06920	FGSG_03994	FGSG_01548							FGSG_07087
FGSG_01268	FGSG_13449	FGSG_11970							FGSG_10115
FGSG_09185	FGSG_06973	FGSG_02929							FGSG_03304
FGSG_04582	FGSG_05836	FGSG_03541							FGSG_08458
FGSG_07310	FGSG_07695	FGSG_03311							FGSG_06751
FGSG_00388	FGSG_10299	FGSG_01325							FGSG_07176
FGSG_09958	FGSG_04091	FGSG_01291							FGSG_02272
FGSG_01588	FGSG_00887	FGSG_10822							FGSG_10418
FGSG_05863	FGSG_10598	FGSG_04983							FGSG_16462
FGSG_08621	FGSG_05578	FGSG_10940							FGSG_09295
FGSG_06730	FGSG_07255	FGSG_05145							FGSG_01361
FGSG_16715	FGSG_05158	FGSG_05508							FGSG_05498
FGSG_16737	FGSG_08204	FGSG_17232							FGSG_06583
FGSG_09623	FGSG_12182	FGSG_09216							FGSG_05488
FGSG_09217	FGSG_10417	FGSG_07180							FGSG_04232
FGSG_01455	FGSG_03249	FGSG_04473							FGSG_17337
FGSG_05430	FGSG_17491	FGSG_04199							FGSG_08603
FGSG_12209	FGSG_15857	FGSG_08814							FGSG_00350
FGSG_01670	FGSG_16770	FGSG_15897							FGSG_10925
FGSG_08347	FGSG_09185	FGSG_16568							FGSG_04886
FGSG_05292	FGSG_08818	FGSG_01314							FGSG_07255
FGSG_08696	FGSG_02319	FGSG_07414							FGSG_02789
FGSG_17359	FGSG_01131	FGSG_04313							FGSG_05225
FGSG_12380	FGSG_08603	FGSG_06705							FGSG_10998
FGSG_03968	FGSG_15499	FGSG_00568							FGSG_10219
FGSG_10821	FGSG_09380	FGSG_04914							FGSG_06707
FGSG_04927	FGSG_08858	FGSG_10247							FGSG_05145
FGSG_02289	FGSG_06861	FGSG_00935							FGSG_05300
FGSG_09392	FGSG_07322	FGSG_13584							FGSG_04275
FGSG_08529	FGSG_16374	FGSG_03288							FGSG_07007
FGSG_16686	FGSG_00729	FGSG_01136							FGSG_16464
FGSG_08429	FGSG_10769	FGSG_06707							FGSG_09422
FGSG_05495	FGSG_07907	FGSG_08630							FGSG_04054
FGSG_09512	FGSG_07425	FGSG_01930							FGSG_01289
FGSG_05974	FGSG_12658	FGSG_01917							FGSG_13638
FGSG_06302	FGSG_16409	FGSG_06088							FGSG_06718
FGSG_09833	FGSG_01902	FGSG_15841							FGSG_12878
FGSG_03546	FGSG_00387	FGSG_05223							FGSG_11967
FGSG_07331	FGSG_09585	FGSG_08273							FGSG_07004
FGSG_05070	FGSG_02098	FGSG_01967							FGSG_08773
FGSG_04401	FGSG_09836	FGSG_12451							FGSG_04105
FGSG_17099	FGSG_09988	FGSG_17268							FGSG_15006
FGSG_03184	FGSG_11828	FGSG_05192							FGSG_09748
FGSG_07113	FGSG_04936	FGSG_01926							FGSG_05645
FGSG_12376	FGSG_04161	FGSG_08453							FGSG_16958
FGSG_01094	FGSG_00170	FGSG_00686							FGSG_00298
FGSG_16957	FGSG_12990	FGSG_08976							FGSG_11332
FGSG_08865	FGSG_06656	FGSG_08551							FGSG_00481
FGSG_09289	FGSG_08567	FGSG_05190							FGSG_10510
FGSG_07087	FGSG_00728	FGSG_08997							FGSG_05546
FGSG_09053	FGSG_00491	FGSG_11469							FGSG_07440
FGSG_10115	FGSG_00424	FGSG_08662							FGSG_16059
FGSG_03304	FGSG_00559	FGSG_06493							FGSG_17234
FGSG_08458	FGSG_06335	FGSG_16559							FGSG_16773
FGSG_06751	FGSG_08014	FGSG_08788							FGSG_07485
FGSG_15598	FGSG_06715	FGSG_05844							FGSG_07355
FGSG_07176	FGSG_01307	FGSG_00887							FGSG_04390
FGSG_02272	FGSG_02974	FGSG_00766							FGSG_00518
FGSG_10418	FGSG_13906	FGSG_05245							FGSG_00649
FGSG_16462	FGSG_06311	FGSG_06043							FGSG_02323
FGSG_03534	FGSG_10077	FGSG_15825							FGSG_11228
FGSG_09295	FGSG_08817	FGSG_00563							FGSG_11636
FGSG_01361	FGSG_17268	FGSG_09560							FGSG_13442
FGSG_05498	FGSG_17000	FGSG_07075							FGSG_06791
FGSG_06583	FGSG_04104	FGSG_06335							FGSG_16751
FGSG_05488	FGSG_07477	FGSG_02629							FGSG_03771
FGSG_04232	FGSG_10834	FGSG_10320							FGSG_06413
FGSG_17337	FGSG_13701	FGSG_12691							FGSG_04982
FGSG_08603	FGSG_16132	FGSG_05826							FGSG_08987
FGSG_00350	FGSG_07417	FGSG_03127							FGSG_06306
FGSG_10925	FGSG_09894	FGSG_12209							FGSG_10790
FGSG_04886	FGSG_00871	FGSG_06300							FGSG_00243
FGSG_07255	FGSG_13718	FGSG_17252							FGSG_16692
FGSG_03532	FGSG_04910	FGSG_04196							FGSG_05844
FGSG_02789	FGSG_04932	FGSG_08667							FGSG_04434
FGSG_05225	FGSG_17605	FGSG_03477							FGSG_13569
FGSG_10998	FGSG_01624	FGSG_03975							FGSG_11469
FGSG_10219	FGSG_09179	FGSG_16826							FGSG_04117
FGSG_06707	FGSG_01972	FGSG_06917							FGSG_13310
FGSG_05145	FGSG_07054	FGSG_00646							FGSG_06855
FGSG_05300	FGSG_01648	FGSG_08291							FGSG_02240
FGSG_04275	FGSG_00646	FGSG_10270							FGSG_05008
FGSG_07007	FGSG_17099	FGSG_06309							FGSG_01965
FGSG_16464	FGSG_17493	FGSG_07503							FGSG_06294
FGSG_09422	FGSG_03011	FGSG_02029							FGSG_02004
FGSG_04054	FGSG_10216	FGSG_09555							FGSG_07045
FGSG_01289	FGSG_09450	FGSG_09158							FGSG_01369
FGSG_10993	FGSG_10114	FGSG_02544							FGSG_17610
FGSG_13638	FGSG_06073	FGSG_12878							FGSG_07121
FGSG_06718	FGSG_06423	FGSG_04985							FGSG_00815
FGSG_12878	FGSG_01276	FGSG_01904							FGSG_05854
FGSG_11967	FGSG_07113	FGSG_01328							FGSG_09003
FGSG_07004	FGSG_00762	FGSG_12182							FGSG_00369
FGSG_08773	FGSG_04054	FGSG_17229							FGSG_16025
FGSG_04105	FGSG_17243	FGSG_09869							FGSG_07436
FGSG_15006	FGSG_15883	FGSG_04193							FGSG_05846
FGSG_09748	FGSG_05843	FGSG_05250							FGSG_11979
FGSG_05645	FGSG_01085	FGSG_13482							FGSG_07057
FGSG_16958	FGSG_05977	FGSG_09451							FGSG_03380
FGSG_00298	FGSG_09500	FGSG_00756							FGSG_00278
FGSG_11332	FGSG_16041	FGSG_05374							FGSG_15757
FGSG_00481	FGSG_09435	FGSG_04887							FGSG_12690
FGSG_10510	FGSG_01250	FGSG_10129							FGSG_00447
FGSG_05546	FGSG_00883	FGSG_06226							FGSG_01177
FGSG_07440	FGSG_12657	FGSG_04889							FGSG_05327
FGSG_16059	FGSG_01537	FGSG_12488							FGSG_01358
FGSG_11738	FGSG_08864	FGSG_02439							FGSG_00560
FGSG_17234	FGSG_05314	FGSG_12739							FGSG_09359
FGSG_16773	FGSG_03609	FGSG_06415							FGSG_13321
FGSG_07485	FGSG_04326	FGSG_05430							FGSG_13619
FGSG_07355	FGSG_08577	FGSG_08696							FGSG_05515
FGSG_04390	FGSG_11636	FGSG_17618							FGSG_16733
FGSG_00518	FGSG_07302	FGSG_10856							FGSG_13906
FGSG_00649	FGSG_07000	FGSG_13234							FGSG_03971
FGSG_02323	FGSG_00698	FGSG_09277							FGSG_00710
FGSG_11228	FGSG_12600	FGSG_01033							FGSG_05738
FGSG_11636	FGSG_09249	FGSG_08851							FGSG_09457
FGSG_13442	FGSG_05300	FGSG_05249							FGSG_00285
FGSG_06791	FGSG_08715	FGSG_06927							FGSG_05223
FGSG_16751	FGSG_06003	FGSG_04571							FGSG_01547
FGSG_03771	FGSG_16604	FGSG_04117							FGSG_01959
FGSG_06413	FGSG_06800	FGSG_02571							FGSG_01832
FGSG_04982	FGSG_04353	FGSG_01623							FGSG_01326
FGSG_08987	FGSG_01464	FGSG_09374							FGSG_07711
FGSG_06306	FGSG_07355	FGSG_05578							FGSG_05154
FGSG_10790	FGSG_09911	FGSG_06056							FGSG_04923
FGSG_00243	FGSG_05430	FGSG_01527							FGSG_15840
FGSG_16692	FGSG_11049	FGSG_09773							FGSG_16955
FGSG_05844	FGSG_06189	FGSG_12862							FGSG_10820
FGSG_04434	FGSG_08645	FGSG_15859							FGSG_00305
FGSG_13569	FGSG_11478	FGSG_07954							FGSG_05316
FGSG_11469	FGSG_16600	FGSG_03966							FGSG_13673
FGSG_04117	FGSG_05882	FGSG_00514							FGSG_12045
FGSG_13310	FGSG_08690	FGSG_04445							FGSG_01052
FGSG_06855	FGSG_01857	FGSG_05339							FGSG_01447
FGSG_02240	FGSG_15125	FGSG_07807							FGSG_08792
FGSG_05008	FGSG_11230	FGSG_12019							FGSG_08662
FGSG_01965	FGSG_10507	FGSG_10418							FGSG_00308
FGSG_06294	FGSG_15825	FGSG_16804							FGSG_00728
FGSG_02004	FGSG_07211	FGSG_09895							FGSG_02335
FGSG_07045	FGSG_06934	FGSG_12557							FGSG_07206
FGSG_01369	FGSG_02567	FGSG_01620							FGSG_02403
FGSG_17610	FGSG_11820	FGSG_13673							FGSG_15106
FGSG_07121	FGSG_16531	FGSG_17702							FGSG_16809
FGSG_00815	FGSG_16938	FGSG_09462							FGSG_10743
FGSG_16329	FGSG_11913	FGSG_08252							FGSG_01198
FGSG_05854	FGSG_10496	FGSG_10041							FGSG_00588
FGSG_09003	FGSG_07366	FGSG_08266							FGSG_09651
FGSG_00369	FGSG_13741	FGSG_01176							FGSG_10856
FGSG_16025	FGSG_04309	FGSG_10280							FGSG_05087
FGSG_07436	FGSG_04766	FGSG_05283							FGSG_10909
FGSG_05846	FGSG_06705	FGSG_13148							FGSG_00654
FGSG_11979	FGSG_09617	FGSG_09141							FGSG_06523
FGSG_07057	FGSG_07890	FGSG_13873							FGSG_07234
FGSG_03380	FGSG_11993	FGSG_05143							FGSG_16937
FGSG_00278	FGSG_11697	FGSG_00576							FGSG_01904
FGSG_15757	FGSG_00306	FGSG_03525							FGSG_11938
FGSG_12690	FGSG_08448	FGSG_07031							FGSG_06792
FGSG_00447	FGSG_16914	FGSG_04547							FGSG_08656
FGSG_01177	FGSG_16452	FGSG_16311							FGSG_16776
FGSG_05327	FGSG_05008	FGSG_08840							FGSG_09361
FGSG_01358	FGSG_08444	FGSG_05982							FGSG_05385
FGSG_00560	FGSG_08712	FGSG_03538							FGSG_04574
FGSG_09359	FGSG_05187	FGSG_10260							FGSG_00449
FGSG_13321	FGSG_09783	FGSG_08428							FGSG_06113
FGSG_13619	FGSG_12937	FGSG_05165							FGSG_09216
FGSG_05515	FGSG_00376	FGSG_08429							FGSG_01419
FGSG_16733	FGSG_13518	FGSG_08920							FGSG_12728
FGSG_11480	FGSG_06006	FGSG_03273							FGSG_03659
FGSG_13906	FGSG_06735	FGSG_06072							FGSG_04044
FGSG_03971	FGSG_09786	FGSG_06001							FGSG_06280
FGSG_00710	FGSG_00702	FGSG_07121							FGSG_06496
FGSG_05738	FGSG_07201	FGSG_03517							FGSG_06404
FGSG_09457	FGSG_05488	FGSG_10180							FGSG_03009
FGSG_00285	FGSG_04032	FGSG_17620							FGSG_06325
FGSG_05223	FGSG_06164	FGSG_07191							FGSG_05446
FGSG_01547	FGSG_03335	FGSG_16343							FGSG_08532
FGSG_01959	FGSG_05072	FGSG_02628							FGSG_02204
FGSG_01832	FGSG_02186	FGSG_11921							FGSG_01818
FGSG_01326	FGSG_09775	FGSG_00999							FGSG_10366
FGSG_07711	FGSG_13673	FGSG_08653							FGSG_08735
FGSG_05154	FGSG_09211	FGSG_13616							FGSG_02496
FGSG_03354	FGSG_09722	FGSG_09908							FGSG_02455
FGSG_04923	FGSG_05455	FGSG_12932							FGSG_02512
FGSG_15840	FGSG_00792	FGSG_08727							FGSG_17246
FGSG_16955	FGSG_00436	FGSG_04223							FGSG_08926
FGSG_09595	FGSG_06282	FGSG_00641							FGSG_06081
FGSG_10820	FGSG_03630	FGSG_10532							FGSG_05211
FGSG_00305	FGSG_16171	FGSG_03069							FGSG_02608
FGSG_05316	FGSG_10901	FGSG_15073							FGSG_01056
FGSG_13673	FGSG_11074	FGSG_00434							FGSG_03517
FGSG_12045	FGSG_08599	FGSG_07069							FGSG_01356
FGSG_01052	FGSG_10306	FGSG_10975							FGSG_09365
FGSG_01447	FGSG_09596	FGSG_06051							FGSG_16132
FGSG_08792	FGSG_00558	FGSG_15730							FGSG_04510
FGSG_08662	FGSG_02773	FGSG_08425							FGSG_09197
FGSG_00308	FGSG_08662	FGSG_05665							FGSG_10367
FGSG_00728	FGSG_05339	FGSG_04227							FGSG_00853
FGSG_02335	FGSG_02267	FGSG_08528							FGSG_03997
FGSG_07206	FGSG_11251	FGSG_13605							FGSG_07075
FGSG_02403	FGSG_01924	FGSG_08543							FGSG_03061
FGSG_15106	FGSG_06760	FGSG_10232							FGSG_08761
FGSG_16809	FGSG_00761	FGSG_06165							FGSG_10259
FGSG_10743	FGSG_17235	FGSG_01653							FGSG_09747
FGSG_01198	FGSG_07768	FGSG_04717							FGSG_01694
FGSG_00588	FGSG_01866	FGSG_10211							FGSG_11298
FGSG_09651	FGSG_06739	FGSG_10008							FGSG_01445
FGSG_10856	FGSG_00452	FGSG_06269							FGSG_01548
FGSG_05087	FGSG_01605	FGSG_17011							FGSG_00562
FGSG_10909	FGSG_11368	FGSG_12188							FGSG_06308
FGSG_00654	FGSG_09340	FGSG_16473							FGSG_00295
FGSG_06523	FGSG_12975	FGSG_16744							FGSG_05836
FGSG_07234	FGSG_01136	FGSG_08443							FGSG_04204
FGSG_16937	FGSG_09748	FGSG_15767							FGSG_01917
FGSG_01904	FGSG_10354	FGSG_05498							FGSG_06511
FGSG_11938	FGSG_04222	FGSG_09672							FGSG_07183
FGSG_06792	FGSG_07495	FGSG_15723							FGSG_04615
FGSG_08656	FGSG_11921	FGSG_13276							FGSG_07194
FGSG_16776	FGSG_05589	FGSG_01086							FGSG_17141
FGSG_09361	FGSG_11445	FGSG_17223							FGSG_07117
FGSG_05385	FGSG_02240	FGSG_10309							FGSG_00747
FGSG_04574	FGSG_04202	FGSG_12745							FGSG_01671
FGSG_00449	FGSG_06112	FGSG_02025							FGSG_01345
FGSG_06113	FGSG_07202	FGSG_01152							FGSG_04350
FGSG_09216	FGSG_06784	FGSG_01311							FGSG_01973
FGSG_01419	FGSG_07937	FGSG_08668							FGSG_01324
FGSG_12728	FGSG_08399	FGSG_09163							FGSG_08521
FGSG_03659	FGSG_02564	FGSG_04909							FGSG_00559
FGSG_04044	FGSG_01505	FGSG_17086							FGSG_06104
FGSG_06280	FGSG_01904	FGSG_05254							FGSG_08997
FGSG_06496	FGSG_06681	FGSG_06523							FGSG_03540
FGSG_06404	FGSG_15005	FGSG_09402							FGSG_00720
FGSG_03009	FGSG_02023	FGSG_06739							FGSG_00325
FGSG_06325	FGSG_16025	FGSG_01981							FGSG_06990
FGSG_05446	FGSG_11204	FGSG_16467							FGSG_12970
FGSG_04589	FGSG_10280	FGSG_09935							FGSG_11888
FGSG_08532	FGSG_09570	FGSG_12154							FGSG_13396
FGSG_02204	FGSG_05436	FGSG_17630							FGSG_08678
FGSG_01818	FGSG_01615	FGSG_00558							FGSG_10793
FGSG_10366	FGSG_08757	FGSG_09431							FGSG_01220
FGSG_08735	FGSG_06791	FGSG_06294							FGSG_06749
FGSG_02496	FGSG_10232	FGSG_17511							FGSG_00436
FGSG_02455	FGSG_02895	FGSG_05379							FGSG_06958
FGSG_02512	FGSG_07442	FGSG_08049							FGSG_06324
FGSG_17246	FGSG_03394	FGSG_08684							FGSG_04986
FGSG_08926	FGSG_04275	FGSG_10267							FGSG_11074
FGSG_06081	FGSG_06113	FGSG_11740							FGSG_11970
FGSG_05211	FGSG_03148	FGSG_00436							FGSG_06935
FGSG_02608	FGSG_00350	FGSG_01390							FGSG_06120
FGSG_01056	FGSG_08421	FGSG_01923							FGSG_16037
FGSG_03517	FGSG_01430	FGSG_02012							FGSG_08426
FGSG_10994	FGSG_04465	FGSG_16464							FGSG_16807
FGSG_01356	FGSG_12800	FGSG_01155							FGSG_10341
FGSG_09365	FGSG_15917	FGSG_01547							FGSG_04889
FGSG_16132	FGSG_10908	FGSG_00036							FGSG_17055
FGSG_04686	FGSG_09597	FGSG_08496							FGSG_01542
FGSG_04510	FGSG_06072	FGSG_06749							FGSG_00695
FGSG_03014	FGSG_06619	FGSG_07858							FGSG_09639
FGSG_09197	FGSG_11105	FGSG_15750							FGSG_05164
FGSG_10367	FGSG_00388	FGSG_00352							FGSG_00352
[truncated: 6,988 more rows]

## Sheet: Patho_only_368 genes
FUNCTIONAL CATEGORY	abs SET	rel SET	genes SET	abs GENOME	rel GENOME	rel SET/rel GENOME	P-VALUE
01 METABOLISM	109	29.6	FGSG_00032 FGSG_00236 FGSG_00541 FGSG_00594 FGSG_01685 FGSG_01734 FGSG_01745 FGSG_01991 FGSG_02064 FGSG_02264 FGSG_02296 FGSG_02432 FGSG_15802 FGSG_15830 FGSG_15836 FGSG_15847 FGSG_15880 FGSG_11550 FGSG_11555 FGSG_11556 FGSG_04689 FGSG_04629 FGSG_04621 FGSG_04593 FGSG_04592 FGSG_04591 FGSG_04590 FGSG_04588 FGSG_04036 FGSG_03972 FGSG_03944 FGSG_03923 FGSG_03813 FGSG_03747 FGSG_03742 FGSG_03713 FGS…	3402	24.6	1.20325	0.0150772
01.01 amino acid metabolism	25	6.79	FGSG_00594 FGSG_01745 FGSG_02296 FGSG_15836 FGSG_15880 FGSG_04629 FGSG_04588 FGSG_03747 FGSG_03742 FGSG_03186 FGSG_02917 FGSG_04968 FGSG_05983 FGSG_13445 FGSG_08083 FGSG_10523 FGSG_10606 FGSG_11106 FGSG_11026 FGSG_10991 FGSG_10990 FGSG_17487 FGSG_11424 FGSG_11396 FGSG_11395	649	4.69	1.44776	0.041021
01.01.03 assimilation of ammonia, metabolism of the glutamate group	2	0.54	FGSG_04968 FGSG_08083	127	0.91	0.593407	1
01.01.03.02 metabolism of glutamate	1	0.27	FGSG_08083	63	0.45	0.6	1
01.01.03.02.02 degradation of glutamate	1	0.27	FGSG_08083	21	0.15	1.8	0.432739
01.01.03.05 metabolism of arginine	1	0.27	FGSG_04968	48	0.34	0.794118	1
01.01.03.05.02 degradation of arginine	1	0.27	FGSG_04968	14	0.1	2.7	0.314674
01.01.05 metabolism of urea cycle, creatine and polyamines	1	0.27	FGSG_02296	45	0.32	0.84375	1
01.01.05.01 metabolism of polyamines	1	0.27	FGSG_02296	17	0.12	2.25	0.368009
01.01.05.01.02 degradation of polyamines	1	0.27	FGSG_02296	10	0.07	3.85714	0.236514
01.01.06 metabolism of the aspartate family	2	0.54	FGSG_00594 FGSG_11396	137	0.99	0.545455	1
01.01.06.02 metabolism of asparagine	1	0.27	FGSG_11396	13	0.09	3	0.295916
01.01.06.02.01 biosynthesis of asparagine	1	0.27	FGSG_11396	7	0.05	5.4	0.172115
01.01.06.06 metabolism of lysine	1	0.27	FGSG_00594	55	0.39	0.692308	1
01.01.06.06.02 degradation of lysine	1	0.27	FGSG_00594	20	0.14	1.92857	0.417205
01.01.09 metabolism of the cysteine - aromatic group	11	2.98	FGSG_01745 FGSG_15836 FGSG_03742 FGSG_02917 FGSG_04968 FGSG_05983 FGSG_13445 FGSG_08083 FGSG_11106 FGSG_10991 FGSG_11424	266	1.92	1.55208	0.0993156
01.01.09.01 metabolism of glycine	3	0.81	FGSG_03742 FGSG_02917 FGSG_05983	48	0.34	2.38235	0.135212
01.01.09.01.01 biosynthesis of glycine	3	0.81	FGSG_03742 FGSG_02917 FGSG_05983	36	0.26	3.11538	0.0700329
01.01.09.03 metabolism of cysteine	1	0.27	FGSG_08083	30	0.21	1.28571	0.55522
01.01.09.03.02 degradation of cysteine	1	0.27	FGSG_08083	12	0.08	3.375	0.276646
01.01.09.04 metabolism of phenylalanine	5	1.35	FGSG_01745 FGSG_04968 FGSG_13445 FGSG_10991 FGSG_11424	94	0.67	2.01493	0.10567
01.01.09.04.01 biosynthesis of phenylalanine	4	1.08	FGSG_01745 FGSG_13445 FGSG_10991 FGSG_11424	61	0.44	2.45455	0.0790413
01.01.09.04.02 degradation of phenylalanine	5	1.35	FGSG_01745 FGSG_04968 FGSG_13445 FGSG_10991 FGSG_11424	64	0.46	2.93478	0.0275424
01.01.09.05 metabolism of tyrosine	2	0.54	FGSG_04968 FGSG_11106	64	0.46	1.17391	0.511265
01.01.09.05.02 degradation of tyrosine	2	0.54	FGSG_04968 FGSG_11106	33	0.23	2.34783	0.21891
01.01.09.06 metabolism of tryptophan	1	0.27	FGSG_15836	47	0.33	0.818182	1
01.01.13 regulation of amino acid metabolism	1	0.27	FGSG_04629	68	0.49	0.55102	1
01.02 nitrogen, sulfur and selenium metabolism	13	3.53	FGSG_01991 FGSG_02264 FGSG_04590 FGSG_03923 FGSG_03177 FGSG_12615 FGSG_07612 FGSG_16929 FGSG_13445 FGSG_10587 FGSG_11123 FGSG_11424 FGSG_11417	336	2.43	1.45267	0.114482
01.02.02 nitrogen metabolism	2	0.54	FGSG_16929 FGSG_10587	63	0.45	1.2	0.502863
01.02.02.06 assimilation of ammonia	1	0.27	FGSG_16929	9	0.06	4.5	0.215623
01.02.03 sulfur metabolism	1	0.27	FGSG_11123	18	0.13	2.07692	0.384852
01.02.07 regulation of nitrogen, sulfur and selenium metabolism	3	0.81	FGSG_03923 FGSG_16929 FGSG_11417	87	0.62	1.30645	0.409468
01.02.07.01 regulation of nitrogen metabolism	2	0.54	FGSG_03923 FGSG_16929	37	0.26	2.07692	0.258534
01.03 nucleotide/nucleoside/nucleobase metabolism	1	0.27	FGSG_15847	407	2.94	0.0918367	1
01.04 phosphate metabolism	11	2.98	FGSG_00541 FGSG_03944 FGSG_02870 FGSG_04743 FGSG_16681 FGSG_08830 FGSG_09329 FGSG_11123 FGSG_11028 FGSG_10995 FGSG_11337	601	4.34	0.686636	1
01.04.04 regulation of phosphate metabolism	1	0.27	FGSG_04743	33	0.23	1.17391	0.589874
01.05 C-compound and carbohydrate metabolism	56	15.2	FGSG_00032 FGSG_00236 FGSG_01685 FGSG_01734 FGSG_02064 FGSG_02296 FGSG_02432 FGSG_15802 FGSG_15830 FGSG_11550 FGSG_11555 FGSG_11556 FGSG_04689 FGSG_04592 FGSG_04036 FGSG_03972 FGSG_03813 FGSG_03742 FGSG_03713 FGSG_03186 FGSG_03175 FGSG_03024 FGSG_02920 FGSG_02917 FGSG_16088 FGSG_16297 FGSG_16313 FGSG_16400 FGSG_04743 FGSG_04773 FGSG_04968 FGSG_04969 FGSG_05330 FGSG_05983 FGSG_06110 FGSG_16565 FGS…	1547	11.1	1.36937	0.0102539
01.05.02 sugar, glucoside, polyol and carboxylate metabolism	7	1.9	FGSG_01685 FGSG_04689 FGSG_04036 FGSG_05330 FGSG_16875 FGSG_08414 FGSG_10638	307	2.22	0.855856	1
01.05.02.04 sugar, glucoside, polyol and carboxylate anabolism	1	0.27	FGSG_05330	85	0.61	0.442623	1
01.05.02.07 sugar, glucoside, polyol and carboxylate catabolism	7	1.9	FGSG_01685 FGSG_04689 FGSG_04036 FGSG_05330 FGSG_16875 FGSG_08414 FGSG_10638	224	1.62	1.17284	0.387428
01.05.03 polysaccharide metabolism	13	3.53	FGSG_01685 FGSG_03742 FGSG_03713 FGSG_03186 FGSG_02920 FGSG_02917 FGSG_04743 FGSG_04773 FGSG_05983 FGSG_06110 FGSG_16875 FGSG_10004 FGSG_11123	291	2.1	1.68095	0.0480561
01.05.06 C-2 compound and organic acid metabolism	2	0.54	FGSG_08066 FGSG_10638	45	0.32	1.6875	0.337611
01.05.06.07 C-2 compound and organic acid catabolism	2	0.54	FGSG_08066 FGSG_10638	39	0.28	1.92857	0.278408
01.05.09 aminosaccharide metabolism	2	0.54	FGSG_03186 FGSG_11123	66	0.47	1.14894	0.527787
01.05.09.04 aminosaccharide anabolism	1	0.27	FGSG_03186	39	0.28	0.964286	1
01.05.09.07 aminosaccharide catabolism	1	0.27	FGSG_11123	25	0.18	1.5	0.490855
01.05.11 aromate metabolism	5	1.35	FGSG_11550 FGSG_16297 FGSG_04968 FGSG_07642 FGSG_13983	87	0.62	2.17742	0.0822597
01.05.11.07 aromate catabolism	4	1.08	FGSG_11550 FGSG_04968 FGSG_07642 FGSG_13983	62	0.44	2.45455	0.0828103
01.05.11.07.01 aerobic aromate catabolism	4	1.08	FGSG_11550 FGSG_04968 FGSG_07642 FGSG_13983	60	0.43	2.51163	0.0753604
01.05.11.07.02 anaerobic aromate catabolism	1	0.27	FGSG_13983	9	0.06	4.5	0.215623
01.05.13 transfer of activated C-1 groups	1	0.27	FGSG_15830	84	0.6	0.45	1
01.05.13.01 S-adenosyl-methionine - homocysteine cycle	1	0.27	FGSG_15830	33	0.23	1.17391	0.589874
01.05.25 regulation of C-compound and carbohydrate metabolism	4	1.08	FGSG_01734 FGSG_02064 FGSG_16313 FGSG_11417	208	1.5	0.72	1
01.06 lipid, fatty acid and isoprenoid metabolism	28	7.6	FGSG_02296 FGSG_11550 FGSG_11555 FGSG_11556 FGSG_04592 FGSG_04591 FGSG_03944 FGSG_03548 FGSG_03547 FGSG_03066 FGSG_16088 FGSG_16340 FGSG_16400 FGSG_04969 FGSG_16565 FGSG_06462 FGSG_07570 FGSG_07612 FGSG_07636 FGSG_07642 FGSG_08652 FGSG_08414 FGSG_09112 FGSG_11211 FGSG_11123 FGSG_10991 FGSG_10989 FGSG_11417	850	6.14	1.23779	0.142362
01.06.02 membrane lipid metabolism	4	1.08	FGSG_16400 FGSG_06462 FGSG_08414 FGSG_11123	156	1.12	0.964286	1
01.06.02.01 phospholipid metabolism	3	0.81	FGSG_06462 FGSG_08414 FGSG_11123	125	0.9	0.9	1
01.06.02.02 glycolipid metabolism	2	0.54	FGSG_16400 FGSG_11123	39	0.28	1.92857	0.278408
01.06.02.03 sphingolipid metabolism	1	0.27	FGSG_11123	8	0.05	5.4	0.194162
01.06.05 fatty acid metabolism	4	1.08	FGSG_11556 FGSG_03547 FGSG_16088 FGSG_11211	157	1.13	0.955752	1
01.06.06 isoprenoid metabolism	7	1.9	FGSG_04592 FGSG_04591 FGSG_03066 FGSG_16340 FGSG_07570 FGSG_10991 FGSG_10989	184	1.33	1.42857	0.219733
01.06.06.05 sesquiterpenes metabolism	1	0.27	FGSG_10991	20	0.14	1.92857	0.417205
01.06.06.11 tetracyclic and pentacyclic triterpenes (cholesterin, steroids and hopanoids) metabolism	5	1.35	FGSG_04592 FGSG_04591 FGSG_07570 FGSG_10991 FGSG_10989	136	0.98	1.37755	0.295966
32.07 detoxification	35	9.51	FGSG_00032 FGSG_00541 FGSG_00593 FGSG_01745 FGSG_02296 FGSG_02341 FGSG_15802 FGSG_11550 FGSG_04590 FGSG_04426 FGSG_03944 FGSG_03548 FGSG_03345 FGSG_03080 FGSG_02870 FGSG_04692 FGSG_04709 FGSG_04969 FGSG_05968 FGSG_16526 FGSG_06554 FGSG_07550 FGSG_07636 FGSG_07642 FGSG_07665 FGSG_08830 FGSG_08093 FGSG_13445 FGSG_08066 FGSG_09329 FGSG_10606 FGSG_11028 FGSG_10995 FGSG_10991 FGSG_11424	520	3.76	2.52926	4.46649e-07
01.06.10 regulation of lipid, fatty acid and isoprenoid metabolism	1	0.27	FGSG_11417	39	0.28	0.964286	1
01.07 metabolism of vitamins, cofactors, and prosthetic groups	10	2.71	FGSG_04593 FGSG_04592 FGSG_04591 FGSG_16297 FGSG_16340 FGSG_06462 FGSG_07570 FGSG_07665 FGSG_08093 FGSG_10991	346	2.5	1.084	0.440818
01.07.01 biosynthesis of vitamins, cofactors, and prosthetic groups	3	0.81	FGSG_04593 FGSG_04591 FGSG_16340	179	1.29	0.627907	1
01.07.04 utilization of vitamins, cofactors, and prosthetic groups	1	0.27	FGSG_16297	20	0.14	1.92857	0.417205
01.20.37.03 metabolism of peptide antibiotics	6	1.63	FGSG_03747 FGSG_10523 FGSG_11026 FGSG_10990 FGSG_17487 FGSG_11395	20	0.14	11.6429	9.64473e-06
01.20.05 metabolism of acetic acid derivatives	1	0.27	FGSG_04588	56	0.4	0.675	1
01.20.05.11 metabolism of polyketides	1	0.27	FGSG_04588	26	0.18	1.5	0.504431
01.20.15 metabolism of derivatives of dehydroquinic acid, shikimic acid and chorismic acid	1	0.27	FGSG_13787	36	0.26	1.03846	0.621835
20.01.27 drug/toxin transport	16	4.34	FGSG_00541 FGSG_00593 FGSG_04426 FGSG_03345 FGSG_03080 FGSG_02870 FGSG_04709 FGSG_07550 FGSG_07665 FGSG_16681 FGSG_08830 FGSG_08093 FGSG_09329 FGSG_10587 FGSG_11028 FGSG_10995	171	1.23	3.52846	1.3329e-05
01.20.17.01 metabolism of nonprotein amino acids	1	0.27	FGSG_02296	22	0.15	1.8	0.447861
01.20 secondary metabolism	35	9.51	FGSG_01991 FGSG_02296 FGSG_15802 FGSG_11550 FGSG_04621 FGSG_04590 FGSG_04588 FGSG_04036 FGSG_03944 FGSG_03747 FGSG_03742 FGSG_03175 FGSG_02917 FGSG_16297 FGSG_16400 FGSG_04692 FGSG_12647 FGSG_04969 FGSG_05983 FGSG_07636 FGSG_07642 FGSG_07661 FGSG_08083 FGSG_17170 FGSG_10523 FGSG_13787 FGSG_10587 FGSG_11106 FGSG_11026 FGSG_10990 FGSG_10989 FGSG_17487 FGSG_11397 FGSG_11395 FGSG_13983	627	4.53	2.09934	2.84065e-05
01.20.17.09 metabolism of alkaloids	2	0.54	FGSG_16400 FGSG_07661	31	0.22	2.45455	0.199293
01.20.21 metabolism of sulfuric acid and L-cysteine derivatives	1	0.27	FGSG_08083	8	0.05	5.4	0.194162
01.20.29 metabolism of secondary products derived from L-glutamic acid, L-proline and L-ornithine	1	0.27	FGSG_08083	11	0.07	3.85714	0.25685
01.20.33 metabolism of secondary products derived from L-tryptophan	1	0.27	FGSG_08083	15	0.1	2.7	0.332933
01.20.35 metabolism of secondary products derived from L-phenylalanine and L-tyrosine	2	0.54	FGSG_01991 FGSG_11106	68	0.49	1.10204	0.543927
01.20.35.01 metabolism of phenylpropanoids	2	0.54	FGSG_01991 FGSG_11106	62	0.44	1.22727	0.494369
01.20.35.01.01 metabolism of melanins	1	0.27	FGSG_11106	32	0.23	1.17391	0.578633
01.20.36 non-ribosomal peptide synthesis	6	1.63	FGSG_03747 FGSG_10523 FGSG_11026 FGSG_10990 FGSG_17487 FGSG_11395	24	0.17	9.58824	3.06026e-05
32 CELL RESCUE, DEFENSE AND VIRULENCE	64	17.3	FGSG_00032 FGSG_00101 FGSG_00126 FGSG_00541 FGSG_00593 FGSG_01745 FGSG_02296 FGSG_02341 FGSG_02680 FGSG_15802 FGSG_15847 FGSG_11550 FGSG_11555 FGSG_04590 FGSG_04588 FGSG_04426 FGSG_04060 FGSG_04036 FGSG_03944 FGSG_03916 FGSG_03747 FGSG_03713 FGSG_03548 FGSG_03345 FGSG_03080 FGSG_03064 FGSG_02870 FGSG_16221 FGSG_16332 FGSG_04692 FGSG_04693 FGSG_04709 FGSG_04969 FGSG_05821 FGSG_05968 FGSG_16526 FGS…	1452	10.5	1.64762	3.29472e-05
32.05 disease, virulence and defense	30	8.15	FGSG_00101 FGSG_00126 FGSG_00541 FGSG_00593 FGSG_02296 FGSG_02680 FGSG_04588 FGSG_04426 FGSG_04060 FGSG_03747 FGSG_03345 FGSG_02870 FGSG_16221 FGSG_16332 FGSG_04692 FGSG_04693 FGSG_05821 FGSG_07550 FGSG_07636 FGSG_07663 FGSG_08830 FGSG_09329 FGSG_10081 FGSG_10523 FGSG_11026 FGSG_10995 FGSG_10990 FGSG_17487 FGSG_11395 FGSG_11381	507	3.66	2.22678	3.73777e-05
01.25 extracellular metabolism	5	1.35	FGSG_03713 FGSG_03432 FGSG_04773 FGSG_06110 FGSG_10004	74	0.53	2.54717	0.0470912
01.25.01 extracellular polysaccharide degradation	4	1.08	FGSG_03713 FGSG_04773 FGSG_06110 FGSG_10004	33	0.23	4.69565	0.0109844
01.25.03 extracellular protein degradation	1	0.27	FGSG_03432	8	0.05	5.4	0.194162
02 ENERGY	21	5.7	FGSG_00032 FGSG_00236 FGSG_02296 FGSG_02432 FGSG_15830 FGSG_15939 FGSG_11556 FGSG_04036 FGSG_03547 FGSG_03186 FGSG_03177 FGSG_03175 FGSG_02920 FGSG_16088 FGSG_16376 FGSG_16565 FGSG_07842 FGSG_08066 FGSG_17170 FGSG_10638 FGSG_11337	609	4.4	1.29545	0.135767
02.01 glycolysis and gluconeogenesis	2	0.54	FGSG_08066 FGSG_17170	112	0.81	0.666667	1
02.07 pentose-phosphate pathway	4	1.08	FGSG_11556 FGSG_03186 FGSG_16088 FGSG_11337	47	0.33	3.27273	0.0358872
02.07.03 pentose-phosphate pathway non oxidative branch	1	0.27	FGSG_11337	5	0.03	9	0.126202
02.11 electron transport and membrane-associated energy conservation	7	1.9	FGSG_00032 FGSG_15830 FGSG_03547 FGSG_03175 FGSG_16565 FGSG_07842 FGSG_17170	166	1.2	1.58333	0.15474
02.11.05 accessory proteins of electron transport and membrane-associated energy conservation	1	0.27	FGSG_00032	49	0.35	0.771429	1
02.11.07 regulation of electron transport and membrane-associated energy conservation	2	0.54	FGSG_03175 FGSG_17170	11	0.07	7.71429	0.0331536
02.13 respiration	5	1.35	FGSG_03547 FGSG_03177 FGSG_16376 FGSG_16565 FGSG_10638	186	1.34	1.00746	0.554209
02.13.03 aerobic respiration	1	0.27	FGSG_03177	107	0.77	0.350649	1
02.16 fermentation	6	1.63	FGSG_00236 FGSG_02296 FGSG_02432 FGSG_04036 FGSG_16565 FGSG_08066	109	0.78	2.08974	0.0708392
02.16.01 alcohol fermentation	4	1.08	FGSG_00236 FGSG_02296 FGSG_02432 FGSG_08066	56	0.4	2.7	0.0615367
02.16.03 lactate fermentation	1	0.27	FGSG_16565	18	0.13	2.07692	0.384852
02.19 metabolism of energy reserves (e.g. glycogen, trehalose)	1	0.27	FGSG_02920	52	0.37	0.72973	1
02.45 energy conversion and regeneration	4	1.08	FGSG_15830 FGSG_15939 FGSG_07842 FGSG_10638	91	0.65	1.66154	0.223821
02.45.15 energy generation (e.g. ATP synthase)	1	0.27	FGSG_15830	25	0.18	1.5	0.490855
10 CELL CYCLE AND DNA PROCESSING	10	2.71	FGSG_12034 FGSG_15830 FGSG_15847 FGSG_04604 FGSG_03762 FGSG_07267 FGSG_08058 FGSG_17097 FGSG_10221 FGSG_11417	1080	7.81	0.346991	1
10.01 DNA processing	7	1.9	FGSG_12034 FGSG_15830 FGSG_15847 FGSG_07267 FGSG_08058 FGSG_17097 FGSG_10221	595	4.3	0.44186	1
10.01.02 DNA topology	2	0.54	FGSG_12034 FGSG_07267	98	0.7	0.771429	1
10.01.03 DNA synthesis and replication	2	0.54	FGSG_12034 FGSG_15847	144	1.04	0.519231	1
10.01.03.05 extension/ polymerization activity	1	0.27	FGSG_15847	47	0.33	0.818182	1
10.01.05 DNA recombination and DNA repair	5	1.35	FGSG_12034 FGSG_15847 FGSG_07267 FGSG_08058 FGSG_10221	309	2.23	0.605381	1
10.01.05.01 DNA repair	4	1.08	FGSG_15847 FGSG_07267 FGSG_08058 FGSG_10221	267	1.93	0.559585	1
10.01.05.03 DNA recombination	3	0.81	FGSG_12034 FGSG_15847 FGSG_07267	113	0.81	1	1
10.01.05.03.01 meiotic recombination	1	0.27	FGSG_12034	29	0.2	1.35	0.543032
10.01.05.03.03 somatic / mitotic recombination	1	0.27	FGSG_07267	20	0.14	1.92857	0.417205
10.01.09 DNA restriction or modification	4	1.08	FGSG_15830 FGSG_07267 FGSG_08058 FGSG_17097	282	2.03	0.53202	1
10.01.09.01 DNA methylation	1	0.27	FGSG_08058	5	0.03	9	0.126202
10.01.09.05 DNA conformation modification (e.g. chromatin)	3	0.81	FGSG_15830 FGSG_07267 FGSG_17097	274	1.98	0.409091	1
10.03 cell cycle	6	1.63	FGSG_12034 FGSG_04604 FGSG_03762 FGSG_07267 FGSG_17097 FGSG_11417	705	5.09	0.320236	1
10.03.01 mitotic cell cycle and cell cycle control	4	1.08	FGSG_04604 FGSG_03762 FGSG_17097 FGSG_11417	507	3.66	0.295082	1
10.03.01.01 mitotic cell cycle	1	0.27	FGSG_03762	203	1.46	0.184932	1
10.03.01.01.05 S phase of mitotic cell cycle	1	0.27	FGSG_03762	14	0.1	2.7	0.314674
10.03.01.03 cell cycle checkpoints (checkpoints of morphogenesis, DNA-damage,-replication, mitotic phase and spindle)	1	0.27	FGSG_03762	76	0.54	0.5	1
10.03.02 meiosis	2	0.54	FGSG_12034 FGSG_07267	124	0.89	0.606742	1
10.03.03 cytokinesis (cell division) /septum formation and hydrolysis	2	0.54	FGSG_17097 FGSG_11417	169	1.22	0.442623	1
10.03.05 cell cycle dependent cytoskeleton reorganization	1	0.27	FGSG_17097	64	0.46	0.586957	1
10.03.05.01 spindle pole body/centrosome and microtubule cycle	1	0.27	FGSG_17097	52	0.37	0.72973	1
10.03.05.03 cell cycle dependent actin filament reorganization	1	0.27	FGSG_17097	11	0.07	3.85714	0.25685
11 TRANSCRIPTION	11	2.98	FGSG_15830 FGSG_15836 FGSG_04592 FGSG_03923 FGSG_16313 FGSG_07267 FGSG_07570 FGSG_16929 FGSG_08064 FGSG_17097 FGSG_10989	1225	8.86	0.336343	1
11.02 RNA synthesis	7	1.9	FGSG_15830 FGSG_03923 FGSG_16313 FGSG_07267 FGSG_16929 FGSG_08064 FGSG_17097	960	6.94	0.273775	1
11.02.03 mRNA synthesis	7	1.9	FGSG_15830 FGSG_03923 FGSG_16313 FGSG_07267 FGSG_16929 FGSG_08064 FGSG_17097	880	6.36	0.298742	1
11.02.03.04 transcriptional control	7	1.9	FGSG_15830 FGSG_03923 FGSG_16313 FGSG_07267 FGSG_16929 FGSG_08064 FGSG_17097	765	5.53	0.34358	1
11.02.03.04.01 transcription activation	1	0.27	FGSG_16929	189	1.36	0.198529	1
11.02.03.04.03 transcription repression	2	0.54	FGSG_15830 FGSG_03923	111	0.8	0.675	1
11.04 RNA processing	4	1.08	FGSG_15836 FGSG_04592 FGSG_07570 FGSG_10989	442	3.19	0.338558	1
11.04.02 tRNA processing	1	0.27	FGSG_15836	64	0.46	0.586957	1
11.04.03 mRNA processing (splicing, 5^-, 3^-end processing)	3	0.81	FGSG_04592 FGSG_07570 FGSG_10989	277	2	0.405	1
11.04.03.01 splicing	3	0.81	FGSG_04592 FGSG_07570 FGSG_10989	214	1.54	0.525974	1
11.06 RNA modification	1	0.27	FGSG_15836	68	0.49	0.55102	1
11.06.02 tRNA modification	1	0.27	FGSG_15836	47	0.33	0.818182	1
14 PROTEIN FATE (folding, modification, destination)	12	3.26	FGSG_15830 FGSG_04604 FGSG_04592 FGSG_03432 FGSG_12615 FGSG_05330 FGSG_07570 FGSG_17004 FGSG_17097 FGSG_09973 FGSG_10525 FGSG_10989	1451	10.4	0.313462	1
14.04 protein targeting, sorting and translocation	1	0.27	FGSG_17097	314	2.27	0.118943	1
14.07 protein modification	8	2.17	FGSG_15830 FGSG_04604 FGSG_12615 FGSG_05330 FGSG_17004 FGSG_17097 FGSG_09973 FGSG_10525	851	6.15	0.352846	1
14.07.02 modification with sugar residues (e.g. glycosylation, deglycosylation)	1	0.27	FGSG_05330	84	0.6	0.45	1
14.07.03 modification by phosphorylation, dephosphorylation, autophosphorylation	2	0.54	FGSG_17004 FGSG_09973	251	1.81	0.298343	1
14.07.04 modification by acetylation, deacetylation	1	0.27	FGSG_17097	82	0.59	0.457627	1
14.07.05 modification by ubiquitination, deubiquitination	1	0.27	FGSG_04604	139	1	0.27	1
14.07.09 posttranslational modification of amino acids (e.g. hydroxylation, methylation)	2	0.54	FGSG_15830 FGSG_12615	57	0.41	1.31707	0.450557
14.13 protein/peptide degradation	6	1.63	FGSG_04604 FGSG_04592 FGSG_03432 FGSG_07570 FGSG_10525 FGSG_10989	443	3.2	0.509375	1
14.13.01 cytoplasmic and nuclear protein degradation	4	1.08	FGSG_04592 FGSG_07570 FGSG_10525 FGSG_10989	298	2.15	0.502326	1
14.13.04 lysosomal and vacuolar protein degradation	1	0.27	FGSG_10525	51	0.36	0.75	1
14.13.04.02 vacuolar protein degradation	1	0.27	FGSG_10525	32	0.23	1.17391	0.578633
16 PROTEIN WITH BINDING FUNCTION OR COFACTOR REQUIREMENT (structural or catalytic)	49	13.3	FGSG_00236 FGSG_00541 FGSG_12034 FGSG_02296 FGSG_02432 FGSG_15830 FGSG_15836 FGSG_15847 FGSG_15939 FGSG_04621 FGSG_04592 FGSG_04590 FGSG_03944 FGSG_03742 FGSG_03548 FGSG_03547 FGSG_03175 FGSG_02917 FGSG_02870 FGSG_16313 FGSG_16340 FGSG_16400 FGSG_12647 FGSG_04968 FGSG_05983 FGSG_16526 FGSG_06462 FGSG_06554 FGSG_07267 FGSG_07570 FGSG_07661 FGSG_07842 FGSG_16681 FGSG_16929 FGSG_08830 FGSG_08083 FGS…	3139	22.7	0.585903	0.999999
16.01 protein binding	9	2.44	FGSG_15830 FGSG_04592 FGSG_03944 FGSG_07267 FGSG_07570 FGSG_08058 FGSG_17097 FGSG_10587 FGSG_10989	1601	11.5	0.212174	1
16.03 nucleic acid binding	10	2.71	FGSG_15830 FGSG_15847 FGSG_04592 FGSG_16313 FGSG_07267 FGSG_07570 FGSG_16929 FGSG_08058 FGSG_10221 FGSG_10989	811	5.86	0.462457	1
16.03.01 DNA binding	7	1.9	FGSG_15830 FGSG_15847 FGSG_16313 FGSG_07267 FGSG_16929 FGSG_08058 FGSG_10221	471	3.4	0.558824	1
16.03.03 RNA binding	3	0.81	FGSG_04592 FGSG_07570 FGSG_10989	327	2.36	0.34322	1
16.07 structural protein binding	1	0.27	FGSG_17097	56	0.4	0.675	1
16.13 C-compound binding	1	0.27	FGSG_15939	44	0.31	0.870968	1
16.17 metal binding	14	3.8	FGSG_00236 FGSG_02432 FGSG_15830 FGSG_15847 FGSG_04590 FGSG_03548 FGSG_03175 FGSG_04968 FGSG_16526 FGSG_06554 FGSG_17170 FGSG_10587 FGSG_11123 FGSG_11106	758	5.48	0.693431	1
16.17.01 calcium binding	3	0.81	FGSG_04968 FGSG_10587 FGSG_11123	99	0.71	1.14085	0.493015
16.17.07 magnesium binding	3	0.81	FGSG_15847 FGSG_04968 FGSG_11123	111	0.8	1.0125	0.570316
16.17.09 heavy metal binding (Cu, Fe, Zn)	12	3.26	FGSG_00236 FGSG_02432 FGSG_15830 FGSG_15847 FGSG_04590 FGSG_03548 FGSG_03175 FGSG_16526 FGSG_06554 FGSG_17170 FGSG_10587 FGSG_11106	499	3.6	0.905556	1
16.19 nucleotide/nucleoside/nucleobase binding	13	3.53	FGSG_00541 FGSG_12034 FGSG_02870 FGSG_06462 FGSG_07267 FGSG_16681 FGSG_08830 FGSG_17097 FGSG_09329 FGSG_10221 FGSG_11028 FGSG_10995 FGSG_11337	868	6.27	0.562998	1
16.19.03 ATP binding	12	3.26	FGSG_00541 FGSG_12034 FGSG_02870 FGSG_07267 FGSG_16681 FGSG_08830 FGSG_17097 FGSG_09329 FGSG_10221 FGSG_11028 FGSG_10995 FGSG_11337	660	4.77	0.683438	1
16.21 complex cofactor/cosubstrate/vitamine binding	21	5.7	FGSG_02296 FGSG_15836 FGSG_04621 FGSG_04590 FGSG_03742 FGSG_03548 FGSG_03547 FGSG_03175 FGSG_02917 FGSG_16340 FGSG_16400 FGSG_12647 FGSG_05983 FGSG_16526 FGSG_06554 FGSG_07661 FGSG_07842 FGSG_08083 FGSG_17170 FGSG_10587 FGSG_10991	514	3.71	1.53639	0.034465
16.21.01 heme binding	6	1.63	FGSG_04590 FGSG_03548 FGSG_16526 FGSG_06554 FGSG_10587 FGSG_10991	91	0.65	2.50769	0.0343796
01.20.17.03 metabolism of amines	6	1.63	FGSG_04621 FGSG_03742 FGSG_02917 FGSG_12647 FGSG_05983 FGSG_10587	35	0.25	6.52	0.000288216
16.21.07 NAD/NADP binding	9	2.44	FGSG_02296 FGSG_03742 FGSG_03175 FGSG_02917 FGSG_16400 FGSG_05983 FGSG_16526 FGSG_17170 FGSG_10991	231	1.67	1.46108	0.164016
16.21.17 pyridoxal phosphate binding	1	0.27	FGSG_08083	63	0.45	0.6	1
18 REGULATION OF METABOLISM AND PROTEIN FUNCTION	2	0.54	FGSG_15830 FGSG_07267	512	3.7	0.145946	1
18.02 regulation of protein activity	2	0.54	FGSG_15830 FGSG_07267	502	3.63	0.14876	1
18.02.09 regulator of transcription factor	2	0.54	FGSG_15830 FGSG_07267	106	0.76	0.710526	1
20 CELLULAR TRANSPORT, TRANSPORT FACILITIES AND TRANSPORT ROUTES	64	17.3	FGSG_11605 FGSG_00101 FGSG_00118 FGSG_00541 FGSG_00593 FGSG_01734 FGSG_01802 FGSG_02064 FGSG_02264 FGSG_02296 FGSG_15830 FGSG_15939 FGSG_11552 FGSG_04621 FGSG_04590 FGSG_04426 FGSG_03956 FGSG_03742 FGSG_03711 FGSG_03548 FGSG_03547 FGSG_12440 FGSG_03345 FGSG_03279 FGSG_03175 FGSG_12505 FGSG_03080 FGSG_03024 FGSG_02917 FGSG_02870 FGSG_16340 FGSG_16376 FGSG_04709 FGSG_12647 FGSG_05612 FGSG_05821 FGS…	2007	14.5	1.1931	0.067762
32.07.05 detoxification by export	12	3.26	FGSG_00541 FGSG_00593 FGSG_04426 FGSG_03345 FGSG_03080 FGSG_02870 FGSG_04709 FGSG_07550 FGSG_08830 FGSG_09329 FGSG_11028 FGSG_10995	139	1	3.26	0.000338425
20.01.01 ion transport	10	2.71	FGSG_01802 FGSG_15830 FGSG_15939 FGSG_11552 FGSG_02870 FGSG_07665 FGSG_08830 FGSG_08093 FGSG_09329 FGSG_11417	321	2.32	1.1681	0.351163
20.01.01.01 cation transport (H+, Na+, K+, Ca2+ , NH4+, etc.)	8	2.17	FGSG_01802 FGSG_15830 FGSG_02870 FGSG_07665 FGSG_08830 FGSG_08093 FGSG_09329 FGSG_11417	269	1.94	1.11856	0.425597
20.01.01.01.01 heavy metal ion transport (Cu+, Fe3+, etc.)	2	0.54	FGSG_07665 FGSG_08093	99	0.71	0.760563	1
20.01.01.01.01.01 siderophore-iron transport	2	0.54	FGSG_07665 FGSG_08093	41	0.29	1.86207	0.298245
20.01.01.07 anion transport	2	0.54	FGSG_15939 FGSG_11417	65	0.47	1.14894	0.519573
20.01.01.07.07 phosphate transport	1	0.27	FGSG_15939	21	0.15	1.8	0.432739
20.03.25 ABC transporters	10	2.71	FGSG_00541 FGSG_00593 FGSG_04426 FGSG_02870 FGSG_07550 FGSG_16681 FGSG_08830 FGSG_09329 FGSG_11028 FGSG_10995	106	0.76	3.56579	0.000520362
20.01.03.01 sugar transport	1	0.27	FGSG_07582	54	0.39	0.692308	1
20.01.03.03 C4-dicarboxylate transport (e.g. malate, succinate, fumarate)	2	0.54	FGSG_15939 FGSG_03024	18	0.13	4.15385	0.0816937
20.01.07 amino acid/amino acid derivatives transport	4	1.08	FGSG_00118 FGSG_02264 FGSG_12440 FGSG_05612	120	0.86	1.25581	0.396878
20.01.09 peptide transport	1	0.27	FGSG_03279	22	0.15	1.8	0.447861
20.01.10 protein transport	1	0.27	FGSG_17097	246	1.77	0.152542	1
20.01.11 amine / polyamine transport	1	0.27	FGSG_02264	58	0.41	0.658537	1
20.01.13 lipid/fatty acid transport	7	1.9	FGSG_02264 FGSG_02870 FGSG_05968 FGSG_06462 FGSG_16681 FGSG_08830 FGSG_09329	141	1.01	1.88119	0.0827382
20.01 transported compounds (substrates)	63	17.1	FGSG_11605 FGSG_00101 FGSG_00118 FGSG_00541 FGSG_00593 FGSG_01734 FGSG_01802 FGSG_02064 FGSG_02264 FGSG_02296 FGSG_15830 FGSG_15939 FGSG_11552 FGSG_04621 FGSG_04590 FGSG_04426 FGSG_03956 FGSG_03742 FGSG_03711 FGSG_03548 FGSG_03547 FGSG_12440 FGSG_03345 FGSG_03279 FGSG_03175 FGSG_12505 FGSG_03080 FGSG_03024 FGSG_02917 FGSG_02870 FGSG_16340 FGSG_16376 FGSG_04709 FGSG_12647 FGSG_05612 FGSG_05821 FGS…	1597	11.5	1.48696	0.000843685
20.01.23 allantoin and allantoate transport	4	1.08	FGSG_11552 FGSG_03956 FGSG_12505 FGSG_11122	75	0.54	2	0.139227
20.01.25 vitamine/cofactor transport	5	1.35	FGSG_11605 FGSG_12505 FGSG_11122 FGSG_11028 FGSG_11417	97	0.7	1.92857	0.116607
20.01.26 neurotransmitter transport	1	0.27	FGSG_02264	46	0.33	0.818182	1
20.01.15 electron transport	22	5.97	FGSG_02296 FGSG_15830 FGSG_04621 FGSG_04590 FGSG_03742 FGSG_03548 FGSG_03547 FGSG_03175 FGSG_02917 FGSG_16340 FGSG_16376 FGSG_12647 FGSG_05983 FGSG_16526 FGSG_16565 FGSG_07842 FGSG_13445 FGSG_17170 FGSG_10587 FGSG_10606 FGSG_10991 FGSG_11424	398	2.87	2.08014	0.00101155
01.20.17 metabolism of secondary products derived from primary amino acids	9	2.44	FGSG_02296 FGSG_04621 FGSG_03742 FGSG_02917 FGSG_16400 FGSG_12647 FGSG_05983 FGSG_07661 FGSG_10587	96	0.69	3.53623	0.00102663
20.03.02 carrier (electrochemical potential-driven transport)	4	1.08	FGSG_01802 FGSG_02264 FGSG_03080 FGSG_04709	142	1.02	1.05882	0.525293
20.03.02.02 symporter	1	0.27	FGSG_02264	69	0.49	0.55102	1
20.03.02.02.01 proton driven symporter	1	0.27	FGSG_02264	50	0.36	0.75	1
20.03.02.03 antiporter	3	0.81	FGSG_01802 FGSG_03080 FGSG_04709	75	0.54	1.5	0.322252
20.03.02.03.01 proton driven antiporter	2	0.54	FGSG_01802 FGSG_04709	45	0.32	1.6875	0.337611
20.03.22 transport ATPases	5	1.35	FGSG_00541 FGSG_02870 FGSG_05968 FGSG_08830 FGSG_09329	123	0.88	1.53409	0.230237
20.01.03 C-compound and carbohydrate transport	19	5.16	FGSG_11605 FGSG_00101 FGSG_01734 FGSG_02064 FGSG_02264 FGSG_15939 FGSG_03711 FGSG_03024 FGSG_05612 FGSG_05821 FGSG_07582 FGSG_07663 FGSG_16681 FGSG_17347 FGSG_11122 FGSG_11028 FGSG_10995 FGSG_11417 FGSG_11381	332	2.4	2.15	0.0014763
20.09 transport routes	32	8.69	FGSG_11605 FGSG_00541 FGSG_00593 FGSG_01734 FGSG_01802 FGSG_02064 FGSG_02264 FGSG_15939 FGSG_11552 FGSG_04426 FGSG_03956 FGSG_03711 FGSG_12440 FGSG_03345 FGSG_12505 FGSG_03024 FGSG_02870 FGSG_04709 FGSG_05612 FGSG_07550 FGSG_07582 FGSG_07665 FGSG_16681 FGSG_08830 FGSG_08093 FGSG_17097 FGSG_17347 FGSG_11123 FGSG_11122 FGSG_11028 FGSG_10995 FGSG_11417	1237	8.94	0.972036	1
20.09.04 mitochondrial transport	3	0.81	FGSG_11605 FGSG_15939 FGSG_05612	118	0.85	0.952941	1
20.09.07 vesicular transport (Golgi network, etc.)	1	0.27	FGSG_17097	267	1.93	0.139896	1
20.09.13 vacuolar/lysosomal transport	5	1.35	FGSG_01802 FGSG_17097 FGSG_11123 FGSG_11028 FGSG_10995	170	1.22	1.10656	0.474528
20.09.14 cytoskeleton-dependent transport	1	0.27	FGSG_17097	58	0.41	0.658537	1
20.09.14.02 actin dependent transport	1	0.27	FGSG_17097	11	0.07	3.85714	0.25685
20.09.16 cellular export and secretion	11	2.98	FGSG_00541 FGSG_00593 FGSG_04426 FGSG_03345 FGSG_02870 FGSG_04709 FGSG_07550 FGSG_07582 FGSG_16681 FGSG_08830 FGSG_17097	268	1.93	1.54404	0.10323
20.09.16.01 Type I protein secretion system (ABC-type transport systems)	3	0.81	FGSG_00541 FGSG_02870 FGSG_08830	39	0.28	2.89286	0.0846621
20.09.16.09 vesicular cellular export	1	0.27	FGSG_17097	45	0.32	0.84375	1
20.09.16.09.03 exocytosis	1	0.27	FGSG_17097	42	0.3	0.9	1
20.09.18 cellular import	16	4.34	FGSG_01734 FGSG_02064 FGSG_02264 FGSG_11552 FGSG_03956 FGSG_03711 FGSG_12440 FGSG_12505 FGSG_03024 FGSG_07582 FGSG_07665 FGSG_08093 FGSG_17097 FGSG_17347 FGSG_11122 FGSG_11417	519	3.75	1.15733	0.308473
20.09.18.07 non-vesicular cellular import	13	3.53	FGSG_01734 FGSG_02064 FGSG_11552 FGSG_03956 FGSG_03711 FGSG_12440 FGSG_12505 FGSG_03024 FGSG_07582 FGSG_07665 FGSG_08093 FGSG_17347 FGSG_11122	278	2.01	1.75622	0.0354334
20.09.18.09 vesicular cellular import	2	0.54	FGSG_17097 FGSG_11417	125	0.9	0.6	1
20.09.18.09.01 endocytosis	2	0.54	FGSG_17097 FGSG_11417	125	0.9	0.6	1
30 CELLULAR COMMUNICATION/SIGNAL TRANSDUCTION MECHANISM	9	2.44	FGSG_00101 FGSG_03023 FGSG_16221 FGSG_16297 FGSG_16332 FGSG_07663 FGSG_08652 FGSG_17004 FGSG_11381	652	4.71	0.518047	1
30.01 cellular signalling	7	1.9	FGSG_00101 FGSG_16221 FGSG_16332 FGSG_07663 FGSG_08652 FGSG_17004 FGSG_11381	560	4.05	0.469136	1
30.01.05 enzyme mediated signal transduction	1	0.27	FGSG_17004	291	2.1	0.128571	1
30.05 transmembrane signal transduction	3	0.81	FGSG_03023 FGSG_16297 FGSG_17004	191	1.38	0.586957	1
30.05.01 receptor enzyme mediated signalling	1	0.27	FGSG_17004	71	0.51	0.529412	1
30.05.01.10 two-component signal transduction system (sensor kinase component)	1	0.27	FGSG_17004	17	0.12	2.25	0.368009
30.05.02 non-enzymatic receptor mediated signalling	1	0.27	FGSG_03023	86	0.62	0.435484	1
30.05.02.24 G-protein coupled receptor signalling pathway	1	0.27	FGSG_03023	38	0.27	1	1
01.06.06.13 tetraterpenes (carotinoids) metabolism	2	0.54	FGSG_03066 FGSG_16340	3	0.02	27	0.00208228
32.01 stress response	16	4.34	FGSG_02296 FGSG_15847 FGSG_04036 FGSG_03916 FGSG_03064 FGSG_02870 FGSG_16526 FGSG_06554 FGSG_07267 FGSG_08830 FGSG_08058 FGSG_17097 FGSG_09329 FGSG_10525 FGSG_10606 FGSG_10995	697	5.04	0.861111	1
32.01.01 oxidative stress response	6	1.63	FGSG_02870 FGSG_16526 FGSG_06554 FGSG_08830 FGSG_09329 FGSG_10606	122	0.88	1.85227	0.107162
32.01.03 osmotic and salt stress response	2	0.54	FGSG_04036 FGSG_17097	90	0.65	0.830769	1
32.01.09 DNA damage response	3	0.81	FGSG_15847 FGSG_07267 FGSG_08058	145	1.04	0.778846	1
32.01.11 nutrient starvation response	1	0.27	FGSG_10525	52	0.37	0.72973	1
32.01.13 electromagnetic waves stress response (e.g. UV, X-ray)	1	0.27	FGSG_08058	14	0.1	2.7	0.314674
32.05.05 virulence, disease factors	14	3.8	FGSG_00101 FGSG_00126 FGSG_02680 FGSG_04588 FGSG_04060 FGSG_03747 FGSG_16221 FGSG_16332 FGSG_07663 FGSG_10081 FGSG_10523 FGSG_10990 FGSG_11395 FGSG_11381	222	1.6	2.375	0.00252196
01.20.37 metabolism of peptide derived compounds	6	1.63	FGSG_03747 FGSG_10523 FGSG_11026 FGSG_10990 FGSG_17487 FGSG_11395	60	0.43	3.7907	0.00509412
32.05.01 resistance proteins	11	2.98	FGSG_00541 FGSG_00593 FGSG_04426 FGSG_03345 FGSG_02870 FGSG_04692 FGSG_07550 FGSG_07636 FGSG_08830 FGSG_09329 FGSG_10995	172	1.24	2.40323	0.00636058
32.05.03 defense related proteins	7	1.9	FGSG_02296 FGSG_03747 FGSG_10523 FGSG_11026 FGSG_10990 FGSG_17487 FGSG_11395	92	0.66	2.87879	0.0113143
32.05.01.03 chemical agent resistance	6	1.63	FGSG_00593 FGSG_04426 FGSG_02870 FGSG_07550 FGSG_08830 FGSG_09329	63	0.45	3.62222	0.00647005
32.05.05.01 toxins	5	1.35	FGSG_04588 FGSG_03747 FGSG_10523 FGSG_10990 FGSG_11395	62	0.44	3.06818	0.0243913
16.21.05 FAD/FMN binding	10	2.71	FGSG_15836 FGSG_04621 FGSG_03742 FGSG_03547 FGSG_02917 FGSG_16340 FGSG_12647 FGSG_05983 FGSG_07661 FGSG_07842	151	1.09	2.48624	0.00716867
32.07.01 detoxification involving cytochrome P450	7	1.9	FGSG_00032 FGSG_01745 FGSG_04590 FGSG_03548 FGSG_13445 FGSG_10991 FGSG_11424	111	0.8	2.375	0.0287365
32.07.03 detoxification by modification	5	1.35	FGSG_15802 FGSG_04692 FGSG_04969 FGSG_06554 FGSG_10606	60	0.43	3.13953	0.0214823
20.03 transport facilities	33	8.96	FGSG_11605 FGSG_00101 FGSG_00541 FGSG_00593 FGSG_01802 FGSG_02264 FGSG_15939 FGSG_11552 FGSG_04426 FGSG_03956 FGSG_03547 FGSG_03345 FGSG_03279 FGSG_12505 FGSG_03080 FGSG_02870 FGSG_04709 FGSG_05612 FGSG_05821 FGSG_05968 FGSG_06462 FGSG_07550 FGSG_07582 FGSG_07663 FGSG_16681 FGSG_08830 FGSG_09329 FGSG_17347 FGSG_11122 FGSG_11028 FGSG_10995 FGSG_11417 FGSG_11381	808	5.84	1.53425	0.00949797
32.07.07 oxygen and radical detoxification	3	0.81	FGSG_16526 FGSG_06554 FGSG_10606	68	0.49	1.65306	0.271182
32.07.07.01 catalase reaction	2	0.54	FGSG_16526 FGSG_06554	8	0.05	10.8	0.0177895
32.07.07.05 peroxidase reaction	1	0.27	FGSG_10606	10	0.07	3.85714	0.236514
32.07.09 detoxification by degradation	2	0.54	FGSG_02296 FGSG_03944	38	0.27	2	0.268472
32.10 degradation / modification of foreign (exogenous) compounds	5	1.35	FGSG_11555 FGSG_04060 FGSG_03944 FGSG_03713 FGSG_10004	77	0.55	2.45455	0.0542244
32.10.07 degradation / modification of foreign (exogenous) polysaccharides	3	0.81	FGSG_04060 FGSG_03713 FGSG_10004	31	0.22	3.68182	0.0485233
32.10.09 degradation / modification of foreign (exogenous) ester compounds	2	0.54	FGSG_11555 FGSG_03944	23	0.16	3.375	0.124033
34 INTERACTION WITH THE ENVIRONMENT	24	6.52	FGSG_00118 FGSG_00541 FGSG_01734 FGSG_01802 FGSG_02064 FGSG_02341 FGSG_04592 FGSG_04036 FGSG_03742 FGSG_03064 FGSG_02917 FGSG_02870 FGSG_05061 FGSG_07570 FGSG_07665 FGSG_16681 FGSG_08830 FGSG_08093 FGSG_08058 FGSG_17004 FGSG_09329 FGSG_10587 FGSG_11028 FGSG_10995	832	6.01	1.08486	0.371089
34.01 homeostasis	8	2.17	FGSG_01802 FGSG_02341 FGSG_03064 FGSG_02870 FGSG_07665 FGSG_08830 FGSG_08093 FGSG_09329	336	2.43	0.893004	1
34.01.01 homeostasis of cations	7	1.9	FGSG_01802 FGSG_03064 FGSG_02870 FGSG_07665 FGSG_08830 FGSG_08093 FGSG_09329	290	2.09	0.909091	1
34.01.01.01 homeostasis of metal ions (Na, K, Ca etc.)	6	1.63	FGSG_01802 FGSG_02870 FGSG_07665 FGSG_08830 FGSG_08093 FGSG_09329	208	1.5	1.08667	0.479184
34.01.01.03 homeostasis of protons	2	0.54	FGSG_01802 FGSG_03064	67	0.48	1.125	0.535905
34.01.03 homeostasis of anions	1	0.27	FGSG_02341	36	0.26	1.03846	0.621835
34.01.03.05 homeostasis of chloride	1	0.27	FGSG_02341	12	0.08	3.375	0.276646
34.07 cell adhesion	1	0.27	FGSG_10587	38	0.27	1	1
34.11 cellular sensing and response to external stimulus	15	4.07	FGSG_00118 FGSG_00541 FGSG_01734 FGSG_02064 FGSG_04592 FGSG_04036 FGSG_03742 FGSG_02917 FGSG_05061 FGSG_07570 FGSG_16681 FGSG_08058 FGSG_17004 FGSG_11028 FGSG_10995	350	2.53	1.6087	0.0479735
34.11.01 photoperception and response	3	0.81	FGSG_04592 FGSG_07570 FGSG_17004	41	0.29	2.7931	0.0950761
34.11.03 chemoperception and response	8	2.17	FGSG_00541 FGSG_04036 FGSG_03742 FGSG_02917 FGSG_16681 FGSG_17004 FGSG_11028 FGSG_10995	165	1.19	1.82353	0.0740094
34.11.03.13 osmosensing and response	4	1.08	FGSG_04036 FGSG_03742 FGSG_02917 FGSG_17004	79	0.57	1.89474	0.159047
34.11.11 rhythm (e.g. circadian, ultradian)	1	0.27	FGSG_05061	19	0.13	2.07692	0.401246
34.11.12 perception of nutrients and nutritional adaptation	3	0.81	FGSG_00118 FGSG_01734 FGSG_02064	88	0.63	1.28571	0.416614
40 CELL FATE	4	1.08	FGSG_04335 FGSG_16297 FGSG_08058 FGSG_17097	548	3.96	0.272727	1
40.01 cell growth / morphogenesis	1	0.27	FGSG_17097	383	2.77	0.0974729	1
40.02.03 activity of intercellular mediators	1	0.27	FGSG_16297	13	0.09	3	0.295916
40.10 cell death	2	0.54	FGSG_04335 FGSG_08058	163	1.17	0.461538	1
40.10.02 apoptosis (type I programmed cell death)	2	0.54	FGSG_04335 FGSG_08058	150	1.08	0.5	1
40.10.02.02 apoptotic program	1	0.27	FGSG_04335	27	0.19	1.42105	0.517647
40.10.02.02.01 apoptotic mitochondrial changes	1	0.27	FGSG_04335	10	0.07	3.85714	0.236514
40.10.02.03 induction of apoptosis	2	0.54	FGSG_04335 FGSG_08058	32	0.23	2.34783	0.209078
40.10.02.03.02 induction of apoptosis by intracellular signals	1	0.27	FGSG_08058	10	0.07	3.85714	0.236514
41 DEVELOPMENT (Systemic)	3	0.81	FGSG_07267 FGSG_16929 FGSG_13536	98	0.7	1.15714	0.486263
41.01 fungal/microorganismic development	3	0.81	FGSG_07267 FGSG_16929 FGSG_13536	98	0.7	1.15714	0.486263
41.01.01 mating (fertilization)	2	0.54	FGSG_07267 FGSG_13536	42	0.3	1.8	0.308134
41.01.03 tissue pattern formation	1	0.27	FGSG_16929	17	0.12	2.25	0.368009
41.01.03.01 fruit body development (sexually or asexually derived spores)	1	0.27	FGSG_16929	15	0.1	2.7	0.332933
42 BIOGENESIS OF CELLULAR COMPONENTS	15	4.07	FGSG_00126 FGSG_15830 FGSG_04689 FGSG_04592 FGSG_04433 FGSG_03432 FGSG_02986 FGSG_05330 FGSG_16565 FGSG_07267 FGSG_07570 FGSG_17004 FGSG_17097 FGSG_10606 FGSG_10989	1165	8.42	0.483373	1
42.01 cell wall	6	1.63	FGSG_04689 FGSG_04433 FGSG_02986 FGSG_05330 FGSG_17004 FGSG_17097	276	1.99	0.819095	1
42.04 cytoskeleton/structural proteins	1	0.27	FGSG_17097	303	2.19	0.123288	1
42.04.03 actin cytoskeleton	1	0.27	FGSG_17097	111	0.8	0.3375	1
42.10 nucleus	3	0.81	FGSG_15830 FGSG_07267 FGSG_17097	300	2.16	0.375	1
42.10.03 organization of chromosome structure	3	0.81	FGSG_15830 FGSG_07267 FGSG_17097	260	1.88	0.430851	1
42.16 mitochondrion	5	1.35	FGSG_04592 FGSG_16565 FGSG_07570 FGSG_10606 FGSG_10989	180	1.3	1.03846	0.52497
42.27 extracellular / secretion proteins	2	0.54	FGSG_00126 FGSG_03432	20	0.14	3.85714	0.0980311
42.29 bud / growth tip	1	0.27	FGSG_17097	31	0.22	1.22727	0.567085
43 CELL TYPE DIFFERENTIATION	15	4.07	FGSG_00101 FGSG_02680 FGSG_03299 FGSG_03279 FGSG_16221 FGSG_16332 FGSG_05821 FGSG_07663 FGSG_16929 FGSG_17004 FGSG_17097 FGSG_10081 FGSG_10525 FGSG_11381 FGSG_11266	649	4.69	0.867804	1
43.01 fungal/microorganismic cell type differentiation	15	4.07	FGSG_00101 FGSG_02680 FGSG_03299 FGSG_03279 FGSG_16221 FGSG_16332 FGSG_05821 FGSG_07663 FGSG_16929 FGSG_17004 FGSG_17097 FGSG_10081 FGSG_10525 FGSG_11381 FGSG_11266	649	4.69	0.867804	1
43.01.03 fungal and other eukaryotic cell type differentiation	15	4.07	FGSG_00101 FGSG_02680 FGSG_03299 FGSG_03279 FGSG_16221 FGSG_16332 FGSG_05821 FGSG_07663 FGSG_16929 FGSG_17004 FGSG_17097 FGSG_10081 FGSG_10525 FGSG_11381 FGSG_11266	649	4.69	0.867804	1
43.01.03.05 budding, cell polarity and filament formation	1	0.27	FGSG_17097	293	2.11	0.127962	1
43.01.03.06 hyphae formation	1	0.27	FGSG_17004	23	0.16	1.6875	0.46258
43.01.03.07 development of conidia	2	0.54	FGSG_02680 FGSG_10081	9	0.06	9	0.0224739
43.01.03.09 development of asco- basidio- or zygospore	4	1.08	FGSG_03279 FGSG_16929 FGSG_17097 FGSG_10525	196	1.41	0.765957	1
99 UNCLASSIFIED PROTEINS	202	54.8	FGSG_00005 FGSG_00030 FGSG_11687 FGSG_00160 FGSG_00237 FGSG_15068 FGSG_00426 FGSG_00432 FGSG_15071 FGSG_11783 FGSG_00569 FGSG_00678 FGSG_15092 FGSG_11818 FGSG_00784 FGSG_15084 FGSG_11839 FGSG_00858 FGSG_01140 FGSG_01192 FGSG_01319 FGSG_01451 FGSG_01517 FGSG_01546 FGSG_01635 FGSG_01691 FGSG_01693 FGSG_01727 FGSG_01771 FGSG_01777 FGSG_01796 FGSG_12038 FGSG_12054 FGSG_15061 FGSG_02104 FGSG_02171 FGS…	7238	52.3	1.0478	0.174616

## Sheet: Sapro_only_768 genes
FUNCTIONAL CATEGORY	abs SET	rel SET	genes SET	abs GENOME	rel GENOME	rel SET/rel GENOME	P-VALUE
01 METABOLISM	179	23.3	FGSG_00014 FGSG_00070 FGSG_00096 FGSG_00807 FGSG_01582 FGSG_11974 FGSG_11988 FGSG_01758 FGSG_01790 FGSG_01988 FGSG_02111 FGSG_02114 FGSG_02118 FGSG_02130 FGSG_02136 FGSG_02147 FGSG_02216 FGSG_02220 FGSG_02266 FGSG_02314 FGSG_12120 FGSG_02668 FGSG_15872 FGSG_15932 FGSG_15958 FGSG_15983 FGSG_15988 FGSG_16018 FGSG_11548 FGSG_04681 FGSG_04678 FGSG_04619 FGSG_04465 FGSG_04439 FGSG_04247 FGSG_04064 FGS…	3402	24.6	0.947154	1
01.01 amino acid metabolism	22	2.86	FGSG_11974 FGSG_01988 FGSG_02136 FGSG_15872 FGSG_03981 FGSG_03730 FGSG_03391 FGSG_03373 FGSG_03264 FGSG_03086 FGSG_16178 FGSG_16193 FGSG_16373 FGSG_05678 FGSG_07880 FGSG_13456 FGSG_17117 FGSG_09483 FGSG_10102 FGSG_10673 FGSG_11192 FGSG_17545	649	4.69	0.609808	1
01.01.03 assimilation of ammonia, metabolism of the glutamate group	2	0.26	FGSG_03981 FGSG_10673	127	0.91	0.285714	1
01.01.03.02 metabolism of glutamate	2	0.26	FGSG_03981 FGSG_10673	63	0.45	0.577778	1
01.01.03.02.01 biosynthesis of glutamate	1	0.13	FGSG_03981	41	0.29	0.448276	1
01.01.03.02.02 degradation of glutamate	2	0.26	FGSG_03981 FGSG_10673	21	0.15	1.73333	0.326931
01.01.05 metabolism of urea cycle, creatine and polyamines	1	0.13	FGSG_11974	45	0.32	0.40625	1
01.01.05.01 metabolism of polyamines	1	0.13	FGSG_11974	17	0.12	1.08333	0.621723
01.01.06 metabolism of the aspartate family	6	0.78	FGSG_15872 FGSG_03981 FGSG_16373 FGSG_05678 FGSG_07880 FGSG_10102	137	0.99	0.787879	1
01.01.06.01 metabolism of aspartate	2	0.26	FGSG_03981 FGSG_10102	25	0.18	1.44444	0.408187
01.01.06.01.01 biosynthesis of aspartate	2	0.26	FGSG_03981 FGSG_10102	13	0.09	2.88889	0.160513
01.01.06.01.02 degradation of aspartate	1	0.13	FGSG_03981	15	0.1	1.3	0.575862
01.01.06.02 metabolism of asparagine	2	0.26	FGSG_03981 FGSG_10102	13	0.09	2.88889	0.160513
01.01.06.02.01 biosynthesis of asparagine	1	0.13	FGSG_03981	7	0.05	2.6	0.329773
01.01.06.02.02 degradation of asparagine	1	0.13	FGSG_10102	5	0.03	4.33333	0.248581
01.01.06.05 metabolism of methionine	1	0.13	FGSG_07880	44	0.31	0.419355	1
01.01.06.05.01 biosynthesis of methionine	1	0.13	FGSG_07880	28	0.2	0.65	1
01.01.06.06 metabolism of lysine	3	0.39	FGSG_15872 FGSG_16373 FGSG_05678	55	0.39	1	1
01.01.06.06.01 biosynthesis of lysine	1	0.13	FGSG_15872	32	0.23	0.565217	1
01.01.06.06.01.03 aminoadipic acid pathway	1	0.13	FGSG_15872	14	0.1	1.3	0.550889
01.01.06.06.02 degradation of lysine	2	0.26	FGSG_16373 FGSG_05678	20	0.14	1.85714	0.30608
01.01.09 metabolism of the cysteine - aromatic group	13	1.69	FGSG_01988 FGSG_03391 FGSG_03373 FGSG_03264 FGSG_03086 FGSG_16178 FGSG_16373 FGSG_05678 FGSG_13456 FGSG_17117 FGSG_09483 FGSG_10673 FGSG_17545	266	1.92	0.880208	1
01.01.09.01 metabolism of glycine	3	0.39	FGSG_03373 FGSG_16373 FGSG_05678	48	0.34	1.14706	0.503055
01.01.09.01.01 biosynthesis of glycine	3	0.39	FGSG_03373 FGSG_16373 FGSG_05678	36	0.26	1.5	0.323149
01.01.09.02 metabolism of serine	2	0.26	FGSG_13456 FGSG_09483	48	0.34	0.764706	1
01.01.09.02.01 biosynthesis of serine	2	0.26	FGSG_13456 FGSG_09483	26	0.18	1.44444	0.427778
01.01.09.03 metabolism of cysteine	1	0.13	FGSG_03391	30	0.21	0.619048	1
01.01.09.03.02 degradation of cysteine	1	0.13	FGSG_03391	12	0.08	1.625	0.496454
01.01.09.04 metabolism of phenylalanine	5	0.65	FGSG_03391 FGSG_03264 FGSG_03086 FGSG_16178 FGSG_17117	94	0.67	0.970149	1
01.01.09.04.01 biosynthesis of phenylalanine	5	0.65	FGSG_03391 FGSG_03264 FGSG_03086 FGSG_16178 FGSG_17117	61	0.44	1.47727	0.25004
01.01.09.04.02 degradation of phenylalanine	4	0.52	FGSG_03391 FGSG_03264 FGSG_03086 FGSG_17117	64	0.46	1.13043	0.47884
01.01.09.05 metabolism of tyrosine	4	0.52	FGSG_01988 FGSG_03391 FGSG_10673 FGSG_17545	64	0.46	1.13043	0.47884
01.01.09.05.01 biosynthesis of tyrosine	1	0.13	FGSG_03391	12	0.08	1.625	0.496454
01.01.09.05.02 degradation of tyrosine	3	0.39	FGSG_01988 FGSG_03391 FGSG_17545	33	0.23	1.69565	0.276796
01.01.09.06 metabolism of tryptophan	1	0.13	FGSG_03391	47	0.33	0.393939	1
01.01.09.06.01 biosynthesis of tryptophan	1	0.13	FGSG_03391	20	0.14	0.928571	1
01.01.09.06.02 degradation of tryptophan	1	0.13	FGSG_03391	14	0.1	1.3	0.550889
01.01.09.07 metabolism of histidine	1	0.13	FGSG_03391	24	0.17	0.764706	1
01.01.09.07.01 biosynthesis of histidine	1	0.13	FGSG_03391	19	0.13	1	1
01.01.13 regulation of amino acid metabolism	1	0.13	FGSG_16193	68	0.49	0.265306	1
01.02 nitrogen, sulfur and selenium metabolism	10	1.3	FGSG_11974 FGSG_03981 FGSG_03650 FGSG_03086 FGSG_05805 FGSG_06562 FGSG_09684 FGSG_17151 FGSG_10102 FGSG_10601	336	2.43	0.534979	1
01.02.02 nitrogen metabolism	2	0.26	FGSG_05805 FGSG_09684	63	0.45	0.577778	1
01.02.02.09 catabolism of nitrogenous compounds	2	0.26	FGSG_05805 FGSG_09684	28	0.2	1.3	0.465896
01.02.07 regulation of nitrogen, sulfur and selenium metabolism	1	0.13	FGSG_10601	87	0.62	0.209677	1
01.02.07.03 regulation of sulphur metabolism	1	0.13	FGSG_10601	3	0.02	6.5	0.157568
01.03 nucleotide/nucleoside/nucleobase metabolism	4	0.52	FGSG_01582 FGSG_02130 FGSG_04619 FGSG_13758	407	2.94	0.176871	1
01.03.01 purin nucleotide/nucleoside/nucleobase metabolism	3	0.39	FGSG_01582 FGSG_04619 FGSG_13758	149	1.07	0.364486	1
01.03.01.01 purine nucleotide /nucleoside/nucleobase catabolism	1	0.13	FGSG_13758	12	0.08	1.625	0.496454
01.03.04 pyrimidine nucleotide/nucleoside/nucleobase metabolism	1	0.13	FGSG_13758	81	0.58	0.224138	1
01.03.04.01 pyrimidine nucleotide/nucleoside/nucleobase catabolism	1	0.13	FGSG_13758	9	0.06	2.16667	0.402202
01.03.16 polynucleotide degradation	2	0.26	FGSG_02130 FGSG_13758	119	0.86	0.302326	1
01.04 phosphate metabolism	18	2.34	FGSG_11988 FGSG_15983 FGSG_03342 FGSG_05076 FGSG_16560 FGSG_06610 FGSG_06881 FGSG_07544 FGSG_07734 FGSG_16885 FGSG_17092 FGSG_13758 FGSG_10547 FGSG_10569 FGSG_10581 FGSG_17357 FGSG_11234 FGSG_03735.2	601	4.34	0.539171	1
01.05 C-compound and carbohydrate metabolism	101	13.1	FGSG_00014 FGSG_00070 FGSG_00096 FGSG_00807 FGSG_11974 FGSG_02220 FGSG_02266 FGSG_02314 FGSG_12120 FGSG_15958 FGSG_16018 FGSG_11548 FGSG_04681 FGSG_04678 FGSG_04465 FGSG_04439 FGSG_04247 FGSG_04064 FGSG_03909 FGSG_03908 FGSG_03795 FGSG_03729 FGSG_03651 FGSG_03628 FGSG_03609 FGSG_03593 FGSG_03570 FGSG_03513 FGSG_03410 FGSG_12443 FGSG_03391 FGSG_03373 FGSG_03309 FGSG_03217 FGSG_03049 FGSG_03041 FGS…	1547	11.1	1.18018	0.0453387
40.01.03.03 guidance of longitudinal cell extension (e.g. pollen tube guidance, axonal pathfinding)	25	3.25	FGSG_00550 FGSG_01799 FGSG_15691 FGSG_15694 FGSG_15945 FGSG_04526 FGSG_03832 FGSG_16103 FGSG_16108 FGSG_12608 FGSG_16412 FGSG_16558 FGSG_16884 FGSG_17092 FGSG_17101 FGSG_09129 FGSG_09146 FGSG_17167 FGSG_10569 FGSG_17385 FGSG_17398 FGSG_11448 FGSG_11372 FGSG_17546 FGSG_17560	65	0.47	6.91489	2.21572e-15
01.05.02.04 sugar, glucoside, polyol and carboxylate anabolism	3	0.39	FGSG_04247 FGSG_16294 FGSG_06451	85	0.61	0.639344	1
34.05.01 cell migration	25	3.25	FGSG_00550 FGSG_01799 FGSG_15691 FGSG_15694 FGSG_15945 FGSG_04526 FGSG_03832 FGSG_16103 FGSG_16108 FGSG_12608 FGSG_16412 FGSG_16558 FGSG_16884 FGSG_17092 FGSG_17101 FGSG_09129 FGSG_09146 FGSG_17167 FGSG_10569 FGSG_17385 FGSG_17398 FGSG_11448 FGSG_11372 FGSG_17546 FGSG_17560	84	0.6	5.41667	1.90996e-12
34.05 cell motility	26	3.38	FGSG_00550 FGSG_01799 FGSG_15691 FGSG_15694 FGSG_15945 FGSG_15988 FGSG_04526 FGSG_03832 FGSG_16103 FGSG_16108 FGSG_12608 FGSG_16412 FGSG_16558 FGSG_16884 FGSG_17092 FGSG_17101 FGSG_09129 FGSG_09146 FGSG_17167 FGSG_10569 FGSG_17385 FGSG_17398 FGSG_11448 FGSG_11372 FGSG_17546 FGSG_17560	138	0.99	3.41414	3.47659e-08
01.05.06 C-2 compound and organic acid metabolism	3	0.39	FGSG_02220 FGSG_12120 FGSG_07318	45	0.32	1.21875	0.459937
01.05.06.07 C-2 compound and organic acid catabolism	3	0.39	FGSG_02220 FGSG_12120 FGSG_07318	39	0.28	1.39286	0.369523
01.05.09 aminosaccharide metabolism	2	0.26	FGSG_02816 FGSG_11254	66	0.47	0.553191	1
01.05.09.07 aminosaccharide catabolism	1	0.13	FGSG_11254	25	0.18	0.722222	1
01.05.11 aromate metabolism	3	0.39	FGSG_07557 FGSG_09347 FGSG_10395	87	0.62	0.629032	1
01.05.11.07 aromate catabolism	1	0.13	FGSG_10395	62	0.44	0.295455	1
01.05.11.07.01 aerobic aromate catabolism	1	0.13	FGSG_10395	60	0.43	0.302326	1
01.05.25 regulation of C-compound and carbohydrate metabolism	4	0.52	FGSG_06235 FGSG_07557 FGSG_13386 FGSG_17622	208	1.5	0.346667	1
01.06 lipid, fatty acid and isoprenoid metabolism	40	5.2	FGSG_02111 FGSG_02114 FGSG_02118 FGSG_02216 FGSG_02266 FGSG_02668 FGSG_15932 FGSG_15988 FGSG_04465 FGSG_12342 FGSG_03819 FGSG_03738 FGSG_03729 FGSG_03696 FGSG_03513 FGSG_12443 FGSG_03342 FGSG_02997 FGSG_16342 FGSG_04738 FGSG_05935 FGSG_16417 FGSG_16577 FGSG_07388 FGSG_08207 FGSG_08139 FGSG_08098 FGSG_17067 FGSG_17094 FGSG_08959 FGSG_13655 FGSG_10474 FGSG_10612 FGSG_10613 FGSG_10673 FGSG_17401 FGS…	850	6.14	0.846906	1
01.06.02 membrane lipid metabolism	5	0.65	FGSG_15988 FGSG_12443 FGSG_03342 FGSG_16342 FGSG_08139	156	1.12	0.580357	1
01.06.02.01 phospholipid metabolism	4	0.52	FGSG_15988 FGSG_12443 FGSG_16342 FGSG_08139	125	0.9	0.577778	1
01.06.02.02 glycolipid metabolism	1	0.13	FGSG_03342	39	0.28	0.464286	1
01.06.05 fatty acid metabolism	6	0.78	FGSG_02111 FGSG_02266 FGSG_02668 FGSG_03342 FGSG_16342 FGSG_08139	157	1.13	0.690265	1
01.06.06 isoprenoid metabolism	12	1.56	FGSG_02111 FGSG_02114 FGSG_02118 FGSG_03819 FGSG_03513 FGSG_03342 FGSG_07388 FGSG_08207 FGSG_10613 FGSG_17401 FGSG_17475 FGSG_17486	184	1.33	1.17293	0.325266
01.06.06.07 diterpenes metabolism	1	0.13	FGSG_17486	12	0.08	1.625	0.496454
01.06.06.11 tetracyclic and pentacyclic triterpenes (cholesterin, steroids and hopanoids) metabolism	11	1.43	FGSG_02111 FGSG_02114 FGSG_02118 FGSG_03819 FGSG_03513 FGSG_03342 FGSG_07388 FGSG_08207 FGSG_17401 FGSG_17475 FGSG_17486	136	0.98	1.45918	0.135238
01.06.10 regulation of lipid, fatty acid and isoprenoid metabolism	1	0.13	FGSG_16577	39	0.28	0.464286	1
01.07 metabolism of vitamins, cofactors, and prosthetic groups	16	2.08	FGSG_11974 FGSG_15958 FGSG_04247 FGSG_03819 FGSG_03651 FGSG_03513 FGSG_12443 FGSG_16373 FGSG_05678 FGSG_07388 FGSG_07557 FGSG_09347 FGSG_10395 FGSG_10613 FGSG_11111 FGSG_11387	346	2.5	0.832	1
01.07.01 biosynthesis of vitamins, cofactors, and prosthetic groups	4	0.52	FGSG_15958 FGSG_03651 FGSG_10613 FGSG_11111	179	1.29	0.403101	1
01.07.04 utilization of vitamins, cofactors, and prosthetic groups	3	0.39	FGSG_07557 FGSG_09347 FGSG_10395	20	0.14	2.78571	0.0963599
01.20 secondary metabolism	43	5.59	FGSG_11974 FGSG_01758 FGSG_01790 FGSG_01988 FGSG_02111 FGSG_02118 FGSG_02216 FGSG_02668 FGSG_15872 FGSG_04247 FGSG_04064 FGSG_12342 FGSG_03729 FGSG_03696 FGSG_03593 FGSG_03391 FGSG_03373 FGSG_03309 FGSG_03086 FGSG_16111 FGSG_16205 FGSG_16213 FGSG_04810 FGSG_16549 FGSG_07557 FGSG_07628 FGSG_16864 FGSG_08824 FGSG_08795 FGSG_08098 FGSG_08017 FGSG_09347 FGSG_09483 FGSG_13655 FGSG_10611 FGSG_10612 FGS…	627	4.53	1.234	0.088366
01.20.01 metabolism of primary metabolic sugar derivatives	2	0.26	FGSG_04247 FGSG_04064	26	0.18	1.44444	0.427778
01.20.01.01 metabolism of secondary monosaccharides	1	0.13	FGSG_04247	4	0.02	6.5	0.204373
01.20.01.05 metabolism of sugar alcohols	1	0.13	FGSG_04064	6	0.04	3.25	0.290336
40.01.03 directional cell growth (morphogenesis)	25	3.25	FGSG_00550 FGSG_01799 FGSG_15691 FGSG_15694 FGSG_15945 FGSG_04526 FGSG_03832 FGSG_16103 FGSG_16108 FGSG_12608 FGSG_16412 FGSG_16558 FGSG_16884 FGSG_17092 FGSG_17101 FGSG_09129 FGSG_09146 FGSG_17167 FGSG_10569 FGSG_17385 FGSG_17398 FGSG_11448 FGSG_11372 FGSG_17546 FGSG_17560	141	1.01	3.21782	2.17745e-07
01.20.05.09 metabolism of eicosanoids	3	0.39	FGSG_02111 FGSG_02216 FGSG_02668	17	0.12	3.25	0.0648897
01.20.05.11 metabolism of polyketides	5	0.65	FGSG_01790 FGSG_15872 FGSG_08795 FGSG_17387 FGSG_17677	26	0.18	3.61111	0.0129632
01.20.17 metabolism of secondary products derived from primary amino acids	8	1.04	FGSG_01758 FGSG_03593 FGSG_03373 FGSG_16111 FGSG_16205 FGSG_16864 FGSG_08824 FGSG_10611	96	0.69	1.50725	0.163933
01.20.17.03 metabolism of amines	2	0.26	FGSG_01758 FGSG_03373	35	0.25	1.04	0.586501
99 UNCLASSIFIED PROTEINS	469	61	FGSG_00016 FGSG_00019 FGSG_11652 FGSG_00023 FGSG_00056 FGSG_11665 FGSG_11666 FGSG_11667 FGSG_00114 FGSG_00119 FGSG_00122 FGSG_00124 FGSG_15053 FGSG_11707 FGSG_11713 FGSG_00230 FGSG_11723 FGSG_00274 FGSG_00313 FGSG_15074 FGSG_00599 FGSG_00734 FGSG_11849 FGSG_15088 FGSG_15100 FGSG_00966 FGSG_11868 FGSG_00980 FGSG_15112 FGSG_01126 FGSG_01145 FGSG_01529 FGSG_01578 FGSG_01631 FGSG_01678 FGSG_01679 FGS…	7238	52.3	1.16635	3.46009e-07
01.20.21 metabolism of sulfuric acid and L-cysteine derivatives	1	0.13	FGSG_03391	8	0.05	2.6	0.367021
01.20.29 metabolism of secondary products derived from L-glutamic acid, L-proline and L-ornithine	1	0.13	FGSG_10673	11	0.07	1.85714	0.466813
01.20.31 metabolism of secondary products derived from L-lysine, L-arginine and L-histidine	1	0.13	FGSG_03391	15	0.1	1.3	0.575862
01.20.33 metabolism of secondary products derived from L-tryptophan	1	0.13	FGSG_03391	15	0.1	1.3	0.575862
01.20.35 metabolism of secondary products derived from L-phenylalanine and L-tyrosine	3	0.39	FGSG_01988 FGSG_08017 FGSG_17545	68	0.49	0.795918	1
01.20.35.01 metabolism of phenylpropanoids	2	0.26	FGSG_01988 FGSG_17545	62	0.44	0.590909	1
01.20.35.01.01 metabolism of melanins	2	0.26	FGSG_01988 FGSG_17545	32	0.23	1.13043	0.537381
01.20.36 non-ribosomal peptide synthesis	2	0.26	FGSG_15872 FGSG_16213	24	0.17	1.52941	0.388275
01.20.37 metabolism of peptide derived compounds	3	0.39	FGSG_04810 FGSG_08098 FGSG_13655	60	0.43	0.906977	1
01.20.37.05 metabolism of beta-lactams	3	0.39	FGSG_04810 FGSG_08098 FGSG_13655	19	0.13	3	0.0852733
01.05.03 polysaccharide metabolism	36	4.68	FGSG_00014 FGSG_00096 FGSG_00807 FGSG_02314 FGSG_16018 FGSG_11548 FGSG_04681 FGSG_03909 FGSG_03908 FGSG_03628 FGSG_03570 FGSG_03410 FGSG_03217 FGSG_02977 FGSG_02816 FGSG_04864 FGSG_04913 FGSG_06451 FGSG_06549 FGSG_07351 FGSG_07639 FGSG_13189 FGSG_07794 FGSG_08011 FGSG_07993 FGSG_09159 FGSG_09375 FGSG_10708 FGSG_11229 FGSG_11208 FGSG_11163 FGSG_13861 FGSG_11494 FGSG_11428 FGSG_11304 FGSG_11254	291	2.1	2.22857	5.35196e-06
01.25 extracellular metabolism	14	1.82	FGSG_02147 FGSG_16018 FGSG_04681 FGSG_03909 FGSG_02977 FGSG_04738 FGSG_04848 FGSG_04864 FGSG_06549 FGSG_08098 FGSG_13655 FGSG_10395 FGSG_11208 FGSG_11428	74	0.53	3.43396	4.79865e-05
01.25.03 extracellular protein degradation	1	0.13	FGSG_02147	8	0.05	2.6	0.367021
01.25.07 extracellular ester compound degradation	3	0.39	FGSG_08098 FGSG_13655 FGSG_11428	16	0.11	3.54545	0.0556588
01.25.09 extracellular lignin degradation	1	0.13	FGSG_10395	13	0.09	1.44444	0.524449
01.25.11 extracellular aminosaccharide degradation	1	0.13	FGSG_04738	3	0.02	6.5	0.157568
02 ENERGY	16	2.08	FGSG_02220 FGSG_12120 FGSG_15988 FGSG_03651 FGSG_03041 FGSG_07318 FGSG_07544 FGSG_16885 FGSG_08044 FGSG_13456 FGSG_08017 FGSG_09483 FGSG_09684 FGSG_17357 FGSG_11387 FGSG_11316	609	4.4	0.472727	1
02.01 glycolysis and gluconeogenesis	7	0.91	FGSG_03651 FGSG_03041 FGSG_07318 FGSG_08044 FGSG_13456 FGSG_08017 FGSG_09483	112	0.81	1.12346	0.430294
02.01.01 glycolysis methylglyoxal bypass	1	0.13	FGSG_03651	7	0.05	2.6	0.329773
02.07 pentose-phosphate pathway	4	0.52	FGSG_16885 FGSG_08044 FGSG_13456 FGSG_09483	47	0.33	1.57576	0.263639
02.07.03 pentose-phosphate pathway non oxidative branch	1	0.13	FGSG_16885	5	0.03	4.33333	0.248581
02.11 electron transport and membrane-associated energy conservation	2	0.26	FGSG_12120 FGSG_09684	166	1.2	0.216667	1
02.13 respiration	4	0.52	FGSG_02220 FGSG_12120 FGSG_07544 FGSG_17357	186	1.34	0.38806	1
02.13.03 aerobic respiration	2	0.26	FGSG_07544 FGSG_17357	107	0.77	0.337662	1
02.16 fermentation	6	0.78	FGSG_02220 FGSG_12120 FGSG_03041 FGSG_07318 FGSG_11387 FGSG_11316	109	0.78	1	1
02.16.01 alcohol fermentation	5	0.65	FGSG_02220 FGSG_12120 FGSG_03041 FGSG_07318 FGSG_11316	56	0.4	1.625	0.19879
02.45 energy conversion and regeneration	3	0.39	FGSG_15988 FGSG_09684 FGSG_17357	91	0.65	0.6	1
02.45.11 conversion to kinetic energy (e.g. movement)	1	0.13	FGSG_15988	24	0.17	0.764706	1
10 CELL CYCLE AND DNA PROCESSING	16	2.08	FGSG_02130 FGSG_15983 FGSG_04587 FGSG_04526 FGSG_03902 FGSG_03832 FGSG_02816 FGSG_07734 FGSG_17078 FGSG_17162 FGSG_10431 FGSG_10581 FGSG_17385 FGSG_11234 FGSG_11363 FGSG_17616	1080	7.81	0.266325	1
10.01 DNA processing	12	1.56	FGSG_02130 FGSG_04587 FGSG_04526 FGSG_03832 FGSG_07734 FGSG_17078 FGSG_17162 FGSG_10581 FGSG_17385 FGSG_11234 FGSG_11363 FGSG_17616	595	4.3	0.362791	1
10.01.02 DNA topology	3	0.39	FGSG_02130 FGSG_17078 FGSG_11234	98	0.7	0.557143	1
10.01.05 DNA recombination and DNA repair	11	1.43	FGSG_02130 FGSG_04526 FGSG_03832 FGSG_07734 FGSG_17078 FGSG_17162 FGSG_10581 FGSG_17385 FGSG_11234 FGSG_11363 FGSG_17616	309	2.23	0.641256	1
10.01.05.01 DNA repair	11	1.43	FGSG_02130 FGSG_04526 FGSG_03832 FGSG_07734 FGSG_17078 FGSG_17162 FGSG_10581 FGSG_17385 FGSG_11234 FGSG_11363 FGSG_17616	267	1.93	0.740933	1
10.01.05.03 DNA recombination	1	0.13	FGSG_17078	113	0.81	0.160494	1
10.01.09 DNA restriction or modification	3	0.39	FGSG_04587 FGSG_17078 FGSG_11234	282	2.03	0.192118	1
10.01.09.05 DNA conformation modification (e.g. chromatin)	3	0.39	FGSG_04587 FGSG_17078 FGSG_11234	274	1.98	0.19697	1
10.03 cell cycle	5	0.65	FGSG_15983 FGSG_04587 FGSG_03902 FGSG_02816 FGSG_10431	705	5.09	0.127701	1
10.03.01 mitotic cell cycle and cell cycle control	5	0.65	FGSG_15983 FGSG_04587 FGSG_03902 FGSG_02816 FGSG_10431	507	3.66	0.177596	1
10.03.01.01 mitotic cell cycle	2	0.26	FGSG_15983 FGSG_04587	203	1.46	0.178082	1
10.03.01.01.01 G1 phase of mitotic cell cycle	1	0.13	FGSG_04587	35	0.25	0.52	1
10.03.01.01.11 M phase	1	0.13	FGSG_15983	78	0.56	0.232143	1
10.03.03 cytokinesis (cell division) /septum formation and hydrolysis	1	0.13	FGSG_15983	169	1.22	0.106557	1
10.03.05 cell cycle dependent cytoskeleton reorganization	1	0.13	FGSG_15983	64	0.46	0.282609	1
10.03.05.01 spindle pole body/centrosome and microtubule cycle	1	0.13	FGSG_15983	52	0.37	0.351351	1
11 TRANSCRIPTION	16	2.08	FGSG_01582 FGSG_02130 FGSG_04619 FGSG_04587 FGSG_03819 FGSG_03513 FGSG_16577 FGSG_07388 FGSG_07557 FGSG_07734 FGSG_13386 FGSG_17078 FGSG_13758 FGSG_10601 FGSG_13818 FGSG_11234	1225	8.86	0.234763	1
11.02 RNA synthesis	12	1.56	FGSG_01582 FGSG_02130 FGSG_04619 FGSG_04587 FGSG_16577 FGSG_07557 FGSG_07734 FGSG_13386 FGSG_17078 FGSG_10601 FGSG_13818 FGSG_11234	960	6.94	0.224784	1
11.02.02 tRNA synthesis	1	0.13	FGSG_02130	55	0.39	0.333333	1
11.02.03 mRNA synthesis	11	1.43	FGSG_01582 FGSG_04619 FGSG_04587 FGSG_16577 FGSG_07557 FGSG_07734 FGSG_13386 FGSG_17078 FGSG_10601 FGSG_13818 FGSG_11234	880	6.36	0.224843	1
11.02.03.01 general transcription activities	3	0.39	FGSG_04587 FGSG_07557 FGSG_17078	192	1.38	0.282609	1
11.02.03.01.01 transcription initiation	1	0.13	FGSG_04587	48	0.34	0.382353	1
11.02.03.01.07 transcription termination	1	0.13	FGSG_17078	16	0.11	1.18182	0.599447
11.02.03.04 transcriptional control	11	1.43	FGSG_01582 FGSG_04619 FGSG_04587 FGSG_16577 FGSG_07557 FGSG_07734 FGSG_13386 FGSG_17078 FGSG_10601 FGSG_13818 FGSG_11234	765	5.53	0.25859	1
11.02.03.04.01 transcription activation	2	0.26	FGSG_13818 FGSG_11234	189	1.36	0.191176	1
11.02.03.04.03 transcription repression	2	0.26	FGSG_07557 FGSG_10601	111	0.8	0.325	1
11.04 RNA processing	8	1.04	FGSG_01582 FGSG_02130 FGSG_04619 FGSG_03819 FGSG_03513 FGSG_07388 FGSG_17078 FGSG_13758	442	3.19	0.326019	1
11.04.01 rRNA processing	1	0.13	FGSG_17078	187	1.35	0.0962963	1
11.04.02 tRNA processing	1	0.13	FGSG_02130	64	0.46	0.282609	1
11.04.03 mRNA processing (splicing, 5^-, 3^-end processing)	7	0.91	FGSG_01582 FGSG_04619 FGSG_03819 FGSG_03513 FGSG_07388 FGSG_17078 FGSG_13758	277	2	0.455	1
11.04.03.01 splicing	4	0.52	FGSG_03819 FGSG_03513 FGSG_07388 FGSG_17078	214	1.54	0.337662	1
11.04.03.11 control of mRNA stability	2	0.26	FGSG_01582 FGSG_04619	29	0.2	1.3	0.484383
12 PROTEIN SYNTHESIS	1	0.13	FGSG_02130	439	3.17	0.0410095	1
12.07 translational control	1	0.13	FGSG_02130	84	0.6	0.216667	1
14 PROTEIN FATE (folding, modification, destination)	37	4.81	FGSG_00807 FGSG_11986 FGSG_02147 FGSG_02748 FGSG_15690 FGSG_15983 FGSG_15988 FGSG_04627 FGSG_04587 FGSG_03819 FGSG_03513 FGSG_03342 FGSG_16108 FGSG_05678 FGSG_16433 FGSG_16466 FGSG_16560 FGSG_16631 FGSG_07388 FGSG_07544 FGSG_07880 FGSG_08464 FGSG_08091 FGSG_17092 FGSG_17096 FGSG_17104 FGSG_17105 FGSG_13519 FGSG_17151 FGSG_10432 FGSG_13758 FGSG_10569 FGSG_10601 FGSG_11105 FGSG_13861 FGSG_17449 FGS…	1451	10.4	0.4625	1
14.01 protein folding and stabilization	2	0.26	FGSG_16631 FGSG_11105	137	0.99	0.262626	1
14.04 protein targeting, sorting and translocation	2	0.26	FGSG_17096 FGSG_17151	314	2.27	0.114537	1
14.07 protein modification	23	2.99	FGSG_11986 FGSG_02147 FGSG_02748 FGSG_15690 FGSG_15983 FGSG_15988 FGSG_04627 FGSG_04587 FGSG_03342 FGSG_16108 FGSG_05678 FGSG_16466 FGSG_16560 FGSG_07880 FGSG_08464 FGSG_17092 FGSG_13519 FGSG_10432 FGSG_13758 FGSG_10569 FGSG_10601 FGSG_17449 FGSG_17509	851	6.15	0.486179	1
14.07.03 modification by phosphorylation, dephosphorylation, autophosphorylation	8	1.04	FGSG_15983 FGSG_15988 FGSG_04627 FGSG_03342 FGSG_16560 FGSG_17092 FGSG_13758 FGSG_10569	251	1.81	0.574586	1
14.07.04 modification by acetylation, deacetylation	2	0.26	FGSG_02147 FGSG_04587	82	0.59	0.440678	1
14.07.05 modification by ubiquitination, deubiquitination	3	0.39	FGSG_16466 FGSG_10601 FGSG_17509	139	1	0.39	1
14.07.09 posttranslational modification of amino acids (e.g. hydroxylation, methylation)	1	0.13	FGSG_07880	57	0.41	0.317073	1
14.07.11 protein processing (proteolytic)	6	0.78	FGSG_02748 FGSG_15690 FGSG_16108 FGSG_13519 FGSG_10432 FGSG_17449	148	1.07	0.728972	1
14.07.11.01 autoproteolytic processing	1	0.13	FGSG_17449	22	0.15	0.866667	1
14.10 assembly of protein complexes	2	0.26	FGSG_16433 FGSG_07544	251	1.81	0.143646	1
14.13 protein/peptide degradation	20	2.6	FGSG_00807 FGSG_02147 FGSG_02748 FGSG_15690 FGSG_04587 FGSG_03819 FGSG_03513 FGSG_16108 FGSG_07388 FGSG_08464 FGSG_08091 FGSG_17096 FGSG_17104 FGSG_17105 FGSG_13519 FGSG_10432 FGSG_10601 FGSG_13861 FGSG_17449 FGSG_17509	443	3.2	0.8125	1
14.13.01 cytoplasmic and nuclear protein degradation	7	0.91	FGSG_02147 FGSG_03819 FGSG_03513 FGSG_16108 FGSG_07388 FGSG_08464 FGSG_17509	298	2.15	0.423256	1
14.13.01.01 proteasomal degradation (ubiquitin/proteasomal pathway)	2	0.26	FGSG_16108 FGSG_17509	173	1.25	0.208	1
14.13.04 lysosomal and vacuolar protein degradation	1	0.13	FGSG_08464	51	0.36	0.361111	1
14.13.04.02 vacuolar protein degradation	1	0.13	FGSG_08464	32	0.23	0.565217	1
16 PROTEIN WITH BINDING FUNCTION OR COFACTOR REQUIREMENT (structural or catalytic)	111	14.4	FGSG_00220 FGSG_00550 FGSG_11974 FGSG_11988 FGSG_01758 FGSG_01799 FGSG_01988 FGSG_02111 FGSG_02114 FGSG_02118 FGSG_02130 FGSG_02147 FGSG_02216 FGSG_02217 FGSG_02668 FGSG_02748 FGSG_15691 FGSG_15694 FGSG_15929 FGSG_15932 FGSG_15945 FGSG_15958 FGSG_15983 FGSG_15988 FGSG_11548 FGSG_04587 FGSG_04526 FGSG_04247 FGSG_03981 FGSG_12342 FGSG_03902 FGSG_03832 FGSG_03819 FGSG_03593 FGSG_03513 FGSG_03391 FGS…	3139	22.7	0.634361	1
16.01 protein binding	45	5.85	FGSG_00220 FGSG_00550 FGSG_01799 FGSG_15691 FGSG_15694 FGSG_15945 FGSG_15983 FGSG_15988 FGSG_04587 FGSG_04526 FGSG_03902 FGSG_03832 FGSG_03819 FGSG_03513 FGSG_16103 FGSG_16108 FGSG_12608 FGSG_05935 FGSG_16412 FGSG_16433 FGSG_16466 FGSG_16558 FGSG_07388 FGSG_07544 FGSG_16884 FGSG_17078 FGSG_17092 FGSG_17094 FGSG_17101 FGSG_09129 FGSG_09146 FGSG_17162 FGSG_17167 FGSG_10547 FGSG_10569 FGSG_10601 FGS…	1601	11.5	0.508696	1
16.03 nucleic acid binding	17	2.21	FGSG_02130 FGSG_04526 FGSG_03832 FGSG_03819 FGSG_03513 FGSG_04747 FGSG_07388 FGSG_13386 FGSG_17078 FGSG_17162 FGSG_13758 FGSG_10581 FGSG_13818 FGSG_17385 FGSG_11234 FGSG_11363 FGSG_17616	811	5.86	0.377133	1
16.03.01 DNA binding	13	1.69	FGSG_02130 FGSG_04526 FGSG_03832 FGSG_04747 FGSG_13386 FGSG_17078 FGSG_17162 FGSG_10581 FGSG_13818 FGSG_17385 FGSG_11234 FGSG_11363 FGSG_17616	471	3.4	0.497059	1
16.03.03 RNA binding	4	0.52	FGSG_03819 FGSG_03513 FGSG_07388 FGSG_13758	327	2.36	0.220339	1
16.05 polysaccharide binding	5	0.65	FGSG_11548 FGSG_02816 FGSG_06549 FGSG_11208 FGSG_11304	38	0.27	2.40741	0.0575216
16.06 motor protein binding	1	0.13	FGSG_15988	26	0.18	0.722222	1
16.13 C-compound binding	1	0.13	FGSG_10613	44	0.31	0.419355	1
16.17 metal binding	29	3.77	FGSG_01988 FGSG_02111 FGSG_02114 FGSG_02118 FGSG_02147 FGSG_02216 FGSG_02668 FGSG_02748 FGSG_15932 FGSG_04247 FGSG_12342 FGSG_03041 FGSG_02816 FGSG_16466 FGSG_08207 FGSG_17078 FGSG_17094 FGSG_17096 FGSG_13758 FGSG_17357 FGSG_17400 FGSG_17401 FGSG_17449 FGSG_17471 FGSG_17475 FGSG_17486 FGSG_11387 FGSG_11316 FGSG_17545	758	5.48	0.687956	1
16.17.01 calcium binding	2	0.26	FGSG_02816 FGSG_17094	99	0.71	0.366197	1
16.17.09 heavy metal binding (Cu, Fe, Zn)	27	3.51	FGSG_01988 FGSG_02111 FGSG_02114 FGSG_02118 FGSG_02147 FGSG_02216 FGSG_02668 FGSG_02748 FGSG_15932 FGSG_04247 FGSG_12342 FGSG_03041 FGSG_16466 FGSG_08207 FGSG_17078 FGSG_17094 FGSG_17096 FGSG_13758 FGSG_17400 FGSG_17401 FGSG_17449 FGSG_17471 FGSG_17475 FGSG_17486 FGSG_11387 FGSG_11316 FGSG_17545	499	3.6	0.975	1
16.19 nucleotide/nucleoside/nucleobase binding	34	4.42	FGSG_11988 FGSG_02130 FGSG_15929 FGSG_15983 FGSG_15988 FGSG_04587 FGSG_04526 FGSG_03832 FGSG_16342 FGSG_05076 FGSG_06610 FGSG_06881 FGSG_07544 FGSG_07687 FGSG_07734 FGSG_16885 FGSG_08139 FGSG_17078 FGSG_17092 FGSG_17162 FGSG_13758 FGSG_10547 FGSG_10569 FGSG_10581 FGSG_10601 FGSG_17385 FGSG_11234 FGSG_11105 FGSG_17464 FGSG_17509 FGSG_11448 FGSG_11363 FGSG_17616 FGSG_03735.2	868	6.27	0.704944	1
16.19.03 ATP binding	30	3.9	FGSG_11988 FGSG_02130 FGSG_15983 FGSG_15988 FGSG_04587 FGSG_04526 FGSG_03832 FGSG_16342 FGSG_05076 FGSG_06610 FGSG_06881 FGSG_07544 FGSG_07734 FGSG_16885 FGSG_08139 FGSG_17078 FGSG_17092 FGSG_17162 FGSG_13758 FGSG_10547 FGSG_10569 FGSG_10581 FGSG_10601 FGSG_17385 FGSG_11234 FGSG_11105 FGSG_17509 FGSG_11363 FGSG_17616 FGSG_03735.2	660	4.77	0.81761	1
16.19.05 GTP binding	5	0.65	FGSG_15929 FGSG_07687 FGSG_17464 FGSG_11448 FGSG_11363	132	0.95	0.684211	1
16.21 complex cofactor/cosubstrate/vitamine binding	27	3.51	FGSG_11974 FGSG_01758 FGSG_02111 FGSG_02114 FGSG_02118 FGSG_02217 FGSG_15932 FGSG_15958 FGSG_04247 FGSG_03981 FGSG_12342 FGSG_03593 FGSG_03391 FGSG_03373 FGSG_03309 FGSG_16205 FGSG_16864 FGSG_08824 FGSG_08207 FGSG_13456 FGSG_09483 FGSG_10611 FGSG_10673 FGSG_17400 FGSG_17401 FGSG_17475 FGSG_17486	514	3.71	0.946092	1
16.21.01 heme binding	11	1.43	FGSG_02111 FGSG_02114 FGSG_02118 FGSG_02217 FGSG_15932 FGSG_12342 FGSG_08207 FGSG_17400 FGSG_17401 FGSG_17475 FGSG_17486	91	0.65	2.2	0.0118674
16.21.05 FAD/FMN binding	10	1.3	FGSG_11974 FGSG_01758 FGSG_15958 FGSG_03593 FGSG_03373 FGSG_03309 FGSG_16205 FGSG_16864 FGSG_08824 FGSG_10611	151	1.09	1.19266	0.329678
16.21.07 NAD/NADP binding	6	0.78	FGSG_11974 FGSG_04247 FGSG_03373 FGSG_13456 FGSG_09483 FGSG_10673	231	1.67	0.467066	1
16.21.17 pyridoxal phosphate binding	2	0.26	FGSG_03981 FGSG_03391	63	0.45	0.577778	1
01.05.02.07 sugar, glucoside, polyol and carboxylate catabolism	27	3.51	FGSG_00096 FGSG_00807 FGSG_02314 FGSG_16018 FGSG_04681 FGSG_04678 FGSG_04247 FGSG_03908 FGSG_03628 FGSG_03609 FGSG_03570 FGSG_03410 FGSG_03049 FGSG_16294 FGSG_04848 FGSG_04913 FGSG_06451 FGSG_07351 FGSG_07639 FGSG_13189 FGSG_07695 FGSG_07794 FGSG_08011 FGSG_10708 FGSG_11163 FGSG_11066 FGSG_11494	224	1.62	2.16667	0.000122515
18 REGULATION OF METABOLISM AND PROTEIN FUNCTION	11	1.43	FGSG_15983 FGSG_04587 FGSG_02816 FGSG_16108 FGSG_16433 FGSG_16466 FGSG_07557 FGSG_17092 FGSG_13758 FGSG_10569 FGSG_10601	512	3.7	0.386486	1
18.01 regulation by	6	0.78	FGSG_15983 FGSG_16108 FGSG_16433 FGSG_17092 FGSG_13758 FGSG_10569	250	1.8	0.433333	1
18.01.01 regulation by modification	4	0.52	FGSG_15983 FGSG_17092 FGSG_13758 FGSG_10569	143	1.03	0.504854	1
18.01.07 regulation by binding / dissociation	1	0.13	FGSG_16108	112	0.81	0.160494	1
18.02 regulation of protein activity	11	1.43	FGSG_15983 FGSG_04587 FGSG_02816 FGSG_16108 FGSG_16433 FGSG_16466 FGSG_07557 FGSG_17092 FGSG_13758 FGSG_10569 FGSG_10601	502	3.63	0.393939	1
18.02.01 enzymatic activity regulation / enzyme regulator	7	0.91	FGSG_04587 FGSG_02816 FGSG_16108 FGSG_16433 FGSG_16466 FGSG_10569 FGSG_10601	313	2.26	0.402655	1
18.02.01.01 enzyme activator	3	0.39	FGSG_04587 FGSG_16433 FGSG_10601	142	1.02	0.382353	1
18.02.01.01.03 protease activator	3	0.39	FGSG_04587 FGSG_16433 FGSG_10601	12	0.08	4.875	0.0257675
18.02.01.02 enzyme inhibitor	1	0.13	FGSG_02816	58	0.41	0.317073	1
18.02.01.02.03 protease inhibitor	1	0.13	FGSG_02816	9	0.06	2.16667	0.402202
18.02.09 regulator of transcription factor	1	0.13	FGSG_07557	106	0.76	0.171053	1
20 CELLULAR TRANSPORT, TRANSPORT FACILITIES AND TRANSPORT ROUTES	91	11.8	FGSG_00015 FGSG_00070 FGSG_00220 FGSG_01593 FGSG_11974 FGSG_11988 FGSG_01758 FGSG_01799 FGSG_01986 FGSG_01989 FGSG_02111 FGSG_02114 FGSG_02118 FGSG_02136 FGSG_02186 FGSG_02216 FGSG_02248 FGSG_02382 FGSG_15691 FGSG_15928 FGSG_15932 FGSG_15958 FGSG_16049 FGSG_04676 FGSG_04637 FGSG_04636 FGSG_04537 FGSG_04525 FGSG_04465 FGSG_12335 FGSG_12342 FGSG_03800 FGSG_03738 FGSG_03424 FGSG_03373 FGSG_12490 FGS…	2007	14.5	0.813793	1
20.01 transported compounds (substrates)	85	11	FGSG_00015 FGSG_00070 FGSG_00220 FGSG_01593 FGSG_11974 FGSG_11988 FGSG_01758 FGSG_01799 FGSG_01986 FGSG_01989 FGSG_02111 FGSG_02114 FGSG_02118 FGSG_02136 FGSG_02216 FGSG_02248 FGSG_02382 FGSG_15691 FGSG_15928 FGSG_15932 FGSG_15958 FGSG_16049 FGSG_04676 FGSG_04637 FGSG_04636 FGSG_04537 FGSG_04465 FGSG_12335 FGSG_12342 FGSG_03800 FGSG_03738 FGSG_03424 FGSG_03373 FGSG_12490 FGSG_03144 FGSG_03086 FGS…	1597	11.5	0.956522	1
20.01.01 ion transport	18	2.34	FGSG_01799 FGSG_02248 FGSG_15691 FGSG_04637 FGSG_03063 FGSG_16213 FGSG_12608 FGSG_16433 FGSG_16558 FGSG_17092 FGSG_09129 FGSG_10404 FGSG_10547 FGSG_10569 FGSG_17398 FGSG_11088 FGSG_17471 FGSG_03735.2	321	2.32	1.00862	0.518574
20.01.01.01 cation transport (H+, Na+, K+, Ca2+ , NH4+, etc.)	17	2.21	FGSG_01799 FGSG_02248 FGSG_15691 FGSG_04637 FGSG_03063 FGSG_16213 FGSG_12608 FGSG_16433 FGSG_16558 FGSG_17092 FGSG_09129 FGSG_10547 FGSG_10569 FGSG_17398 FGSG_11088 FGSG_17471 FGSG_03735.2	269	1.94	1.13918	0.326307
20.01.01.01.01 heavy metal ion transport (Cu+, Fe3+, etc.)	4	0.52	FGSG_02248 FGSG_04637 FGSG_16213 FGSG_17471	99	0.71	0.732394	1
20.01.01.01.01.01 siderophore-iron transport	2	0.26	FGSG_16213 FGSG_17471	41	0.29	0.896552	1
20.01.01.07 anion transport	3	0.39	FGSG_03063 FGSG_10404 FGSG_10547	65	0.47	0.829787	1
20.01.01.07.07 phosphate transport	1	0.13	FGSG_10404	21	0.15	0.866667	1
20.01.01.07.08 organic anion transport	1	0.13	FGSG_10547	3	0.02	6.5	0.157568
01.25.01 extracellular polysaccharide degradation	8	1.04	FGSG_16018 FGSG_04681 FGSG_03909 FGSG_02977 FGSG_04848 FGSG_04864 FGSG_06549 FGSG_11208	33	0.23	4.52174	0.000350564
20.01.03.01 sugar transport	5	0.65	FGSG_00070 FGSG_04465 FGSG_09367 FGSG_10661 FGSG_11147	54	0.39	1.66667	0.179396
20.01.07 amino acid/amino acid derivatives transport	6	0.78	FGSG_00220 FGSG_02136 FGSG_04637 FGSG_08221 FGSG_17165 FGSG_11111	120	0.86	0.906977	1
20.01.09 peptide transport	2	0.26	FGSG_06562 FGSG_09287	22	0.15	1.73333	0.347609
20.01.10 protein transport	2	0.26	FGSG_03738 FGSG_02997	246	1.77	0.146893	1
20.01.11 amine / polyamine transport	3	0.39	FGSG_00220 FGSG_08221 FGSG_11111	58	0.41	0.95122	1
20.01.13 lipid/fatty acid transport	6	0.78	FGSG_04465 FGSG_08221 FGSG_10474 FGSG_11111 FGSG_10923 FGSG_03735.2	141	1.01	0.772277	1
20.01.15 electron transport	21	2.73	FGSG_11974 FGSG_01758 FGSG_02111 FGSG_02114 FGSG_02118 FGSG_02216 FGSG_15932 FGSG_15958 FGSG_12342 FGSG_03373 FGSG_03086 FGSG_16373 FGSG_05678 FGSG_16433 FGSG_08207 FGSG_09684 FGSG_10673 FGSG_17400 FGSG_17401 FGSG_17475 FGSG_17486	398	2.87	0.95122	1
20.01.23 allantoin and allantoate transport	6	0.78	FGSG_01986 FGSG_02382 FGSG_06468 FGSG_16874 FGSG_08016 FGSG_11219	75	0.54	1.44444	0.236963
20.01.25 vitamine/cofactor transport	7	0.91	FGSG_01986 FGSG_02382 FGSG_06468 FGSG_16874 FGSG_08016 FGSG_11219 FGSG_11111	97	0.7	1.3	0.293305
20.01.26 neurotransmitter transport	3	0.39	FGSG_00220 FGSG_08221 FGSG_11111	46	0.33	1.18182	0.474497
20.01.27 drug/toxin transport	8	1.04	FGSG_11988 FGSG_15928 FGSG_12335 FGSG_04976 FGSG_05076 FGSG_06881 FGSG_10547 FGSG_03735.2	171	1.23	0.845528	1
20.03 transport facilities	50	6.51	FGSG_00015 FGSG_00070 FGSG_00220 FGSG_01593 FGSG_11988 FGSG_01986 FGSG_01989 FGSG_02186 FGSG_02248 FGSG_02382 FGSG_16049 FGSG_04676 FGSG_04637 FGSG_04525 FGSG_04465 FGSG_12335 FGSG_03800 FGSG_03424 FGSG_12490 FGSG_03144 FGSG_03063 FGSG_04976 FGSG_05076 FGSG_05352 FGSG_16433 FGSG_06468 FGSG_06881 FGSG_07544 FGSG_16874 FGSG_16911 FGSG_08408 FGSG_08222 FGSG_08221 FGSG_08016 FGSG_09287 FGSG_09367 FGS…	808	5.84	1.11473	0.229454
20.03.01 channel / pore class transport	1	0.13	FGSG_10547	51	0.36	0.361111	1
20.03.01.01 ion channels	1	0.13	FGSG_10547	32	0.23	0.565217	1
20.03.02 carrier (electrochemical potential-driven transport)	8	1.04	FGSG_00070 FGSG_00220 FGSG_09367 FGSG_10404 FGSG_10474 FGSG_10661 FGSG_11147 FGSG_11088	142	1.02	1.01961	0.535488
20.03.02.02 symporter	7	0.91	FGSG_00070 FGSG_00220 FGSG_09367 FGSG_10404 FGSG_10474 FGSG_10661 FGSG_11147	69	0.49	1.85714	0.0875329
20.03.02.02.01 proton driven symporter	5	0.65	FGSG_00070 FGSG_09367 FGSG_10474 FGSG_10661 FGSG_11147	50	0.36	1.80556	0.142966
20.03.02.02.02 sodium driven symporter	2	0.26	FGSG_00220 FGSG_10404	12	0.08	3.25	0.140764
20.03.02.03 antiporter	1	0.13	FGSG_11088	75	0.54	0.240741	1
20.03.22 transport ATPases	9	1.17	FGSG_11988 FGSG_02186 FGSG_04525 FGSG_16433 FGSG_06881 FGSG_07544 FGSG_11003 FGSG_10923 FGSG_03735.2	123	0.88	1.32955	0.244288
20.03.25 ABC transporters	6	0.78	FGSG_11988 FGSG_12335 FGSG_05076 FGSG_06881 FGSG_10547 FGSG_03735.2	106	0.76	1.02632	0.540872
20.09 transport routes	44	5.72	FGSG_00015 FGSG_00070 FGSG_01593 FGSG_11988 FGSG_01986 FGSG_02136 FGSG_02186 FGSG_02248 FGSG_02382 FGSG_15928 FGSG_04676 FGSG_04637 FGSG_04636 FGSG_04537 FGSG_04525 FGSG_04465 FGSG_12335 FGSG_03424 FGSG_03144 FGSG_03063 FGSG_04976 FGSG_05076 FGSG_05352 FGSG_06235 FGSG_16433 FGSG_06468 FGSG_06881 FGSG_16874 FGSG_16911 FGSG_08221 FGSG_08016 FGSG_17096 FGSG_09367 FGSG_17165 FGSG_10404 FGSG_10474 FGS…	1237	8.94	0.639821	1
20.09.13 vacuolar/lysosomal transport	2	0.26	FGSG_16433 FGSG_17096	170	1.22	0.213115	1
20.09.16 cellular export and secretion	12	1.56	FGSG_11988 FGSG_02186 FGSG_15928 FGSG_04637 FGSG_04525 FGSG_04465 FGSG_12335 FGSG_04976 FGSG_05076 FGSG_06881 FGSG_10474 FGSG_11003	268	1.93	0.80829	1
20.09.16.01 Type I protein secretion system (ABC-type transport systems)	4	0.52	FGSG_11988 FGSG_12335 FGSG_05076 FGSG_06881	39	0.28	1.85714	0.169074
20.09.18 cellular import	33	4.29	FGSG_00015 FGSG_00070 FGSG_01593 FGSG_01986 FGSG_02136 FGSG_02248 FGSG_02382 FGSG_04676 FGSG_04637 FGSG_04636 FGSG_04537 FGSG_04465 FGSG_03424 FGSG_03144 FGSG_03063 FGSG_05352 FGSG_06235 FGSG_06468 FGSG_16874 FGSG_16911 FGSG_08221 FGSG_08016 FGSG_09367 FGSG_17165 FGSG_10404 FGSG_10474 FGSG_10661 FGSG_11219 FGSG_11147 FGSG_11111 FGSG_17471 FGSG_11495 FGSG_17622	519	3.75	1.144	0.232624
16.25 oxygen binding	4	0.52	FGSG_02111 FGSG_08207 FGSG_17400 FGSG_17475	8	0.05	10.4	0.00055234
30 CELLULAR COMMUNICATION/SIGNAL TRANSDUCTION MECHANISM	30	3.9	FGSG_01989 FGSG_02155 FGSG_02748 FGSG_15929 FGSG_15938 FGSG_15945 FGSG_15983 FGSG_16049 FGSG_04627 FGSG_04587 FGSG_04526 FGSG_03800 FGSG_02816 FGSG_05793 FGSG_16412 FGSG_16560 FGSG_07557 FGSG_07687 FGSG_08408 FGSG_08222 FGSG_17092 FGSG_09347 FGSG_10431 FGSG_13758 FGSG_10569 FGSG_10601 FGSG_17449 FGSG_17464 FGSG_11448 FGSG_11363	652	4.71	0.828025	1
30.01 cellular signalling	22	2.86	FGSG_01989 FGSG_02155 FGSG_02748 FGSG_15929 FGSG_15938 FGSG_15983 FGSG_16049 FGSG_04627 FGSG_04526 FGSG_03800 FGSG_05793 FGSG_16412 FGSG_16560 FGSG_07687 FGSG_08408 FGSG_08222 FGSG_17092 FGSG_13758 FGSG_10569 FGSG_17464 FGSG_11448 FGSG_11363	560	4.05	0.706173	1
30.01.05 enzyme mediated signal transduction	6	0.78	FGSG_15983 FGSG_04627 FGSG_16560 FGSG_17092 FGSG_13758 FGSG_10569	291	2.1	0.371429	1
30.01.05.01 protein kinase	5	0.65	FGSG_15983 FGSG_16560 FGSG_17092 FGSG_13758 FGSG_10569	138	0.99	0.656566	1
30.01.05.01.03 MAPKKK cascade	1	0.13	FGSG_16560	30	0.21	0.619048	1
30.01.05.01.06 serine/threonine kinase	4	0.52	FGSG_15983 FGSG_17092 FGSG_13758 FGSG_10569	77	0.55	0.945455	1
30.01.09 second messenger mediated signal transduction	2	0.26	FGSG_15983 FGSG_10569	99	0.71	0.366197	1
30.01.09.03 Ca2+ mediated signal transduction	1	0.13	FGSG_10569	34	0.24	0.541667	1
30.01.09.11 polyphosphoinositol mediated signal transduction	1	0.13	FGSG_15983	36	0.26	0.5	1
30.05 transmembrane signal transduction	11	1.43	FGSG_02748 FGSG_15945 FGSG_04627 FGSG_04587 FGSG_02816 FGSG_07557 FGSG_17092 FGSG_09347 FGSG_10431 FGSG_10601 FGSG_17449	191	1.38	1.03623	0.495394
30.05.01 receptor enzyme mediated signalling	1	0.13	FGSG_04627	71	0.51	0.254902	1
30.05.01.10 two-component signal transduction system (sensor kinase component)	1	0.13	FGSG_04627	17	0.12	1.08333	0.621723
30.05.02 non-enzymatic receptor mediated signalling	8	1.04	FGSG_02748 FGSG_15945 FGSG_04587 FGSG_02816 FGSG_17092 FGSG_10431 FGSG_10601 FGSG_17449	86	0.62	1.67742	0.104414
30.05.02.14 Notch-receptor signalling pathway	3	0.39	FGSG_04587 FGSG_10601 FGSG_17449	16	0.11	3.54545	0.0556588
30.05.02.20 Wnt signalling pathway	2	0.26	FGSG_15945 FGSG_17092	14	0.1	2.6	0.180722
30.05.02.24 G-protein coupled receptor signalling pathway	1	0.13	FGSG_02748	38	0.27	0.481481	1
30.05.02.26 integrin receptor signalling pathway	3	0.39	FGSG_02816 FGSG_10431 FGSG_17449	13	0.09	4.33333	0.0321442
30.07 regulation of signal transduction	1	0.13	FGSG_02748	24	0.17	0.764706	1
32 CELL RESCUE, DEFENSE AND VIRULENCE	86	11.1	FGSG_01582 FGSG_11974 FGSG_11988 FGSG_01790 FGSG_01989 FGSG_02111 FGSG_02114 FGSG_02118 FGSG_02155 FGSG_02217 FGSG_02220 FGSG_12120 FGSG_02668 FGSG_15872 FGSG_15928 FGSG_15932 FGSG_15938 FGSG_15958 FGSG_16049 FGSG_04619 FGSG_04587 FGSG_04526 FGSG_12335 FGSG_12342 FGSG_03908 FGSG_03832 FGSG_03800 FGSG_03795 FGSG_03729 FGSG_03696 FGSG_03651 FGSG_03264 FGSG_03217 FGSG_12490 FGSG_03086 FGSG_03041 FGS…	1452	10.5	1.05714	0.275576
32.01 stress response	23	2.99	FGSG_11974 FGSG_02217 FGSG_15958 FGSG_04526 FGSG_03832 FGSG_03651 FGSG_16108 FGSG_16631 FGSG_06610 FGSG_08464 FGSG_17094 FGSG_17162 FGSG_10102 FGSG_10547 FGSG_10581 FGSG_10673 FGSG_13818 FGSG_17385 FGSG_11105 FGSG_11088 FGSG_11363 FGSG_17616 FGSG_03735.2	697	5.04	0.593254	1
32.01.01 oxidative stress response	7	0.91	FGSG_11974 FGSG_02217 FGSG_15958 FGSG_03651 FGSG_17094 FGSG_10673 FGSG_03735.2	122	0.88	1.03409	0.520445
32.01.03 osmotic and salt stress response	2	0.26	FGSG_03651 FGSG_11088	90	0.65	0.4	1
32.01.04 pH stress response	1	0.13	FGSG_03651	10	0.07	1.85714	0.43543
32.01.05 heat shock response	1	0.13	FGSG_03651	43	0.31	0.419355	1
32.01.06 cold shock response	1	0.13	FGSG_13818	4	0.02	6.5	0.204373
32.01.07 unfolded protein response (e.g. ER quality control)	1	0.13	FGSG_11105	80	0.57	0.22807	1
32.01.09 DNA damage response	7	0.91	FGSG_04526 FGSG_03832 FGSG_17162 FGSG_10581 FGSG_17385 FGSG_11363 FGSG_17616	145	1.04	0.875	1
32.01.11 nutrient starvation response	3	0.39	FGSG_06610 FGSG_08464 FGSG_10102	52	0.37	1.05405	0.557644
32.05 disease, virulence and defense	40	5.2	FGSG_01582 FGSG_11988 FGSG_01790 FGSG_01989 FGSG_02118 FGSG_02155 FGSG_02220 FGSG_12120 FGSG_15872 FGSG_15928 FGSG_15938 FGSG_15958 FGSG_16049 FGSG_04619 FGSG_04587 FGSG_12335 FGSG_03800 FGSG_03264 FGSG_03217 FGSG_12490 FGSG_04749 FGSG_04848 FGSG_05793 FGSG_05805 FGSG_06881 FGSG_07757 FGSG_08795 FGSG_08408 FGSG_08222 FGSG_08098 FGSG_17117 FGSG_13655 FGSG_10547 FGSG_10601 FGSG_17387 FGSG_17400 FGS…	507	3.66	1.42077	0.0158476
32.05.01 resistance proteins	6	0.78	FGSG_11988 FGSG_15928 FGSG_12335 FGSG_06881 FGSG_10547 FGSG_03735.2	172	1.24	0.629032	1
32.05.01.03 chemical agent resistance	1	0.13	FGSG_03735.2	63	0.45	0.288889	1
32.05.03 defense related proteins	7	0.91	FGSG_02220 FGSG_12120 FGSG_03264 FGSG_08098 FGSG_17117 FGSG_13655 FGSG_17486	92	0.66	1.37879	0.249754
32.10 degradation / modification of foreign (exogenous) compounds	12	1.56	FGSG_11974 FGSG_15932 FGSG_03908 FGSG_03795 FGSG_02977 FGSG_04864 FGSG_05935 FGSG_06610 FGSG_07794 FGSG_08098 FGSG_11208 FGSG_11163	77	0.55	2.83636	0.00103978
32.05.05.01 toxins	6	0.78	FGSG_01790 FGSG_15872 FGSG_08795 FGSG_17387 FGSG_17400 FGSG_17677	62	0.44	1.77273	0.128783
32.07 detoxification	32	4.16	FGSG_11974 FGSG_11988 FGSG_02111 FGSG_02114 FGSG_02217 FGSG_02668 FGSG_15928 FGSG_15932 FGSG_12335 FGSG_12342 FGSG_03729 FGSG_03696 FGSG_03651 FGSG_03264 FGSG_03086 FGSG_03041 FGSG_04976 FGSG_05805 FGSG_05935 FGSG_06881 FGSG_07318 FGSG_07628 FGSG_08207 FGSG_17094 FGSG_17117 FGSG_10395 FGSG_10612 FGSG_17401 FGSG_17475 FGSG_17486 FGSG_11387 FGSG_03735.2	520	3.76	1.10638	0.298029
32.07.01 detoxification involving cytochrome P450	11	1.43	FGSG_02111 FGSG_02114 FGSG_15932 FGSG_12342 FGSG_03264 FGSG_03086 FGSG_08207 FGSG_17117 FGSG_17401 FGSG_17475 FGSG_17486	111	0.8	1.7875	0.0442083
32.07.03 detoxification by modification	6	0.78	FGSG_11974 FGSG_03729 FGSG_03696 FGSG_03651 FGSG_07628 FGSG_10612	60	0.43	1.81395	0.114752
32.07.05 detoxification by export	6	0.78	FGSG_11988 FGSG_15928 FGSG_12335 FGSG_04976 FGSG_06881 FGSG_03735.2	139	1	0.78	1
32.07.07 oxygen and radical detoxification	3	0.39	FGSG_02217 FGSG_02668 FGSG_17094	68	0.49	0.795918	1
32.07.07.01 catalase reaction	1	0.13	FGSG_02217	8	0.05	2.6	0.367021
32.07.07.05 peroxidase reaction	2	0.26	FGSG_02668 FGSG_17094	10	0.07	3.71429	0.103152
32.07.09 detoxification by degradation	3	0.39	FGSG_05805 FGSG_05935 FGSG_10395	38	0.27	1.44444	0.354104
32.10.07 degradation / modification of foreign (exogenous) polysaccharides	7	0.91	FGSG_03908 FGSG_03795 FGSG_02977 FGSG_04864 FGSG_07794 FGSG_11208 FGSG_11163	31	0.22	4.13636	0.00129231
20.09.18.07 non-vesicular cellular import	28	3.64	FGSG_00015 FGSG_00070 FGSG_01986 FGSG_02136 FGSG_02248 FGSG_02382 FGSG_04676 FGSG_04637 FGSG_04636 FGSG_04537 FGSG_04465 FGSG_03424 FGSG_03144 FGSG_03063 FGSG_05352 FGSG_06235 FGSG_06468 FGSG_16874 FGSG_16911 FGSG_08016 FGSG_09367 FGSG_17165 FGSG_10474 FGSG_10661 FGSG_11219 FGSG_11147 FGSG_11495 FGSG_17622	278	2.01	1.81095	0.00169347
32.10.09 degradation / modification of foreign (exogenous) ester compounds	3	0.39	FGSG_05935 FGSG_06610 FGSG_08098	23	0.16	2.4375	0.132766
34 INTERACTION WITH THE ENVIRONMENT	56	7.29	FGSG_00220 FGSG_00550 FGSG_11974 FGSG_11988 FGSG_01799 FGSG_02114 FGSG_02248 FGSG_02668 FGSG_02748 FGSG_15691 FGSG_15694 FGSG_15945 FGSG_15988 FGSG_04637 FGSG_04627 FGSG_04526 FGSG_03832 FGSG_03819 FGSG_03513 FGSG_03373 FGSG_03063 FGSG_16103 FGSG_16108 FGSG_16213 FGSG_12608 FGSG_06235 FGSG_16412 FGSG_16433 FGSG_16558 FGSG_07388 FGSG_16884 FGSG_08207 FGSG_08098 FGSG_17092 FGSG_17096 FGSG_17101 FGS…	832	6.01	1.21298	0.0763903
34.01 homeostasis	13	1.69	FGSG_02248 FGSG_04637 FGSG_03063 FGSG_16213 FGSG_16433 FGSG_17096 FGSG_17113 FGSG_10404 FGSG_10474 FGSG_10547 FGSG_11088 FGSG_17471 FGSG_03735.2	336	2.43	0.695473	1
34.01.01 homeostasis of cations	13	1.69	FGSG_02248 FGSG_04637 FGSG_03063 FGSG_16213 FGSG_16433 FGSG_17096 FGSG_17113 FGSG_10404 FGSG_10474 FGSG_10547 FGSG_11088 FGSG_17471 FGSG_03735.2	290	2.09	0.808612	1
34.01.01.01 homeostasis of metal ions (Na, K, Ca etc.)	8	1.04	FGSG_02248 FGSG_04637 FGSG_16213 FGSG_17096 FGSG_10547 FGSG_11088 FGSG_17471 FGSG_03735.2	208	1.5	0.693333	1
34.01.01.03 homeostasis of protons	3	0.39	FGSG_16433 FGSG_10474 FGSG_11088	67	0.48	0.8125	1
34.01.03 homeostasis of anions	1	0.13	FGSG_10404	36	0.26	0.5	1
34.01.03.03 homeostasis of phosphate	1	0.13	FGSG_10404	15	0.1	1.3	0.575862
34.03 membrane excitability	3	0.39	FGSG_00220 FGSG_08098 FGSG_13655	39	0.28	1.39286	0.369523
34.03.01 synaptic transmission	3	0.39	FGSG_00220 FGSG_08098 FGSG_13655	36	0.26	1.5	0.323149
34.03.03 regulation, generation and propagation of action potential	2	0.26	FGSG_08098 FGSG_13655	19	0.13	2	0.285108
32.05.05 virulence, disease factors	23	2.99	FGSG_01790 FGSG_01989 FGSG_02118 FGSG_02155 FGSG_15872 FGSG_15938 FGSG_15958 FGSG_16049 FGSG_03800 FGSG_03217 FGSG_12490 FGSG_04749 FGSG_04848 FGSG_05793 FGSG_05805 FGSG_07757 FGSG_08795 FGSG_08408 FGSG_08222 FGSG_17387 FGSG_17400 FGSG_11428 FGSG_17677	222	1.6	1.86875	0.00295835
20.01.03 C-compound and carbohydrate transport	31	4.03	FGSG_00015 FGSG_00070 FGSG_01593 FGSG_01989 FGSG_02382 FGSG_16049 FGSG_04676 FGSG_04636 FGSG_04537 FGSG_04465 FGSG_03800 FGSG_03424 FGSG_12490 FGSG_03144 FGSG_05352 FGSG_06235 FGSG_06468 FGSG_16874 FGSG_16911 FGSG_08408 FGSG_08222 FGSG_08221 FGSG_08016 FGSG_09367 FGSG_09376 FGSG_10474 FGSG_10661 FGSG_11147 FGSG_11111 FGSG_11495 FGSG_17622	332	2.4	1.67917	0.00323167
34.05.02 motor activity	1	0.13	FGSG_15988	26	0.18	0.722222	1
34.07 cell adhesion	1	0.13	FGSG_17449	38	0.27	0.481481	1
34.07.01 cell-cell adhesion	1	0.13	FGSG_17449	11	0.07	1.85714	0.466813
34.11 cellular sensing and response to external stimulus	13	1.69	FGSG_11974 FGSG_11988 FGSG_02114 FGSG_02668 FGSG_02748 FGSG_04627 FGSG_03819 FGSG_03513 FGSG_03373 FGSG_06235 FGSG_07388 FGSG_08207 FGSG_17622	350	2.53	0.667984	1
34.11.01 photoperception and response	3	0.39	FGSG_03819 FGSG_03513 FGSG_07388	41	0.29	1.34483	0.400136
34.11.03 chemoperception and response	4	0.52	FGSG_11974 FGSG_11988 FGSG_04627 FGSG_03373	165	1.19	0.436975	1
34.11.03.13 osmosensing and response	2	0.26	FGSG_04627 FGSG_03373	79	0.57	0.45614	1
34.11.12 perception of nutrients and nutritional adaptation	4	0.52	FGSG_02114 FGSG_06235 FGSG_08207 FGSG_17622	88	0.63	0.825397	1
34.11.13 gas and metabolite distribution	2	0.26	FGSG_02668 FGSG_02748	13	0.09	2.88889	0.160513
34.11.13.07 circulation (e.g. blood pressure)	2	0.26	FGSG_02668 FGSG_02748	12	0.08	3.25	0.140764
36 SYSTEMIC INTERACTION WITH THE ENVIRONMENT	1	0.13	FGSG_05805	18	0.13	1	0.642761
36.20 plant / fungal specific systemic sensing and response	1	0.13	FGSG_05805	18	0.13	1	0.642761
36.20.18 plant hormonal regulation	1	0.13	FGSG_05805	18	0.13	1	0.642761
40 CELL FATE	33	4.29	FGSG_00550 FGSG_01799 FGSG_02644 FGSG_02668 FGSG_15691 FGSG_15694 FGSG_15945 FGSG_04587 FGSG_04526 FGSG_03832 FGSG_16103 FGSG_16108 FGSG_04738 FGSG_12608 FGSG_16412 FGSG_16466 FGSG_16558 FGSG_07557 FGSG_16884 FGSG_17092 FGSG_17101 FGSG_09129 FGSG_09146 FGSG_09347 FGSG_17167 FGSG_10569 FGSG_10601 FGSG_17385 FGSG_17398 FGSG_11448 FGSG_11372 FGSG_17546 FGSG_17560	548	3.96	1.08333	0.339483
40.01 cell growth / morphogenesis	27	3.51	FGSG_00550 FGSG_01799 FGSG_02644 FGSG_15691 FGSG_15694 FGSG_15945 FGSG_04526 FGSG_03832 FGSG_16103 FGSG_16108 FGSG_04738 FGSG_12608 FGSG_16412 FGSG_16558 FGSG_16884 FGSG_17092 FGSG_17101 FGSG_09129 FGSG_09146 FGSG_17167 FGSG_10569 FGSG_17385 FGSG_17398 FGSG_11448 FGSG_11372 FGSG_17546 FGSG_17560	383	2.77	1.26715	0.120511
01.20.05 metabolism of acetic acid derivatives	9	1.17	FGSG_01790 FGSG_02111 FGSG_02216 FGSG_02668 FGSG_15872 FGSG_08795 FGSG_09483 FGSG_17387 FGSG_17677	56	0.4	2.925	0.00346822
01.05.02 sugar, glucoside, polyol and carboxylate metabolism	29	3.77	FGSG_00096 FGSG_00807 FGSG_02314 FGSG_16018 FGSG_04681 FGSG_04678 FGSG_04247 FGSG_03908 FGSG_03628 FGSG_03609 FGSG_03570 FGSG_03410 FGSG_03049 FGSG_16294 FGSG_04848 FGSG_04913 FGSG_06451 FGSG_07351 FGSG_07639 FGSG_13189 FGSG_07695 FGSG_07794 FGSG_08011 FGSG_10708 FGSG_11163 FGSG_13861 FGSG_11066 FGSG_11494 FGSG_11254	307	2.22	1.6982	0.0036561
40.02.03 activity of intercellular mediators	2	0.26	FGSG_07557 FGSG_09347	13	0.09	2.88889	0.160513
40.10 cell death	6	0.78	FGSG_02668 FGSG_04587 FGSG_04738 FGSG_16466 FGSG_10569 FGSG_10601	163	1.17	0.666667	1
40.10.02 apoptosis (type I programmed cell death)	6	0.78	FGSG_02668 FGSG_04587 FGSG_04738 FGSG_16466 FGSG_10569 FGSG_10601	150	1.08	0.722222	1
40.10.02.01 anti-apoptosis	3	0.39	FGSG_02668 FGSG_04738 FGSG_10569	31	0.22	1.77273	0.246267
40.10.02.02 apoptotic program	2	0.26	FGSG_04587 FGSG_10601	27	0.19	1.36842	0.447022
40.10.02.02.02 caspase activation	2	0.26	FGSG_04587 FGSG_10601	11	0.07	3.71429	0.121598
40.10.02.03 induction of apoptosis	1	0.13	FGSG_10569	32	0.23	0.565217	1
40.10.02.03.01 induction of apoptosis by extracellular signals	1	0.13	FGSG_10569	5	0.03	4.33333	0.248581
40.10.02.04 regulation of apoptosis	3	0.39	FGSG_04587 FGSG_10569 FGSG_10601	20	0.14	2.78571	0.0963599
41 DEVELOPMENT (Systemic)	6	0.78	FGSG_15929 FGSG_04747 FGSG_07687 FGSG_17464 FGSG_11448 FGSG_11363	98	0.7	1.11429	0.463815
41.01 fungal/microorganismic development	6	0.78	FGSG_15929 FGSG_04747 FGSG_07687 FGSG_17464 FGSG_11448 FGSG_11363	98	0.7	1.11429	0.463815
41.01.03 tissue pattern formation	1	0.13	FGSG_04747	17	0.12	1.08333	0.621723
41.01.03.01 fruit body development (sexually or asexually derived spores)	1	0.13	FGSG_04747	15	0.1	1.3	0.575862
42 BIOGENESIS OF CELLULAR COMPONENTS	34	4.42	FGSG_01799 FGSG_02130 FGSG_02147 FGSG_02220 FGSG_12120 FGSG_15691 FGSG_15983 FGSG_15988 FGSG_04627 FGSG_04587 FGSG_04439 FGSG_03908 FGSG_03513 FGSG_03041 FGSG_16373 FGSG_12608 FGSG_05232 FGSG_05678 FGSG_16558 FGSG_16560 FGSG_06610 FGSG_07544 FGSG_07794 FGSG_07993 FGSG_17078 FGSG_17092 FGSG_09129 FGSG_09159 FGSG_10569 FGSG_10673 FGSG_10708 FGSG_17398 FGSG_11234 FGSG_11163	1165	8.42	0.524941	1
42.01 cell wall	14	1.82	FGSG_02130 FGSG_02147 FGSG_04627 FGSG_04439 FGSG_03908 FGSG_03041 FGSG_05232 FGSG_16560 FGSG_06610 FGSG_07794 FGSG_07993 FGSG_09159 FGSG_10708 FGSG_11163	276	1.99	0.914573	1
42.04 cytoskeleton/structural proteins	10	1.3	FGSG_01799 FGSG_15691 FGSG_15983 FGSG_15988 FGSG_12608 FGSG_16558 FGSG_17092 FGSG_09129 FGSG_10569 FGSG_17398	303	2.19	0.593607	1
42.04.05 microtubule cytoskeleton	1	0.13	FGSG_15983	78	0.56	0.232143	1
42.10 nucleus	4	0.52	FGSG_02147 FGSG_04587 FGSG_17078 FGSG_11234	300	2.16	0.240741	1
42.10.03 organization of chromosome structure	4	0.52	FGSG_02147 FGSG_04587 FGSG_17078 FGSG_11234	260	1.88	0.276596	1
42.16 mitochondrion	5	0.65	FGSG_02220 FGSG_12120 FGSG_03513 FGSG_07544 FGSG_10673	180	1.3	0.5	1
42.19 peroxisome	2	0.26	FGSG_16373 FGSG_05678	34	0.24	1.08333	0.570567
42.32 flagellum	1	0.13	FGSG_15988	5	0.03	4.33333	0.248581
43 CELL TYPE DIFFERENTIATION	40	5.2	FGSG_01989 FGSG_02152 FGSG_02155 FGSG_02409 FGSG_15929 FGSG_15938 FGSG_15964 FGSG_16049 FGSG_04660 FGSG_04647 FGSG_04627 FGSG_04622 FGSG_04587 FGSG_03800 FGSG_12443 FGSG_03063 FGSG_16073 FGSG_16170 FGSG_12590 FGSG_04802 FGSG_05793 FGSG_16577 FGSG_06562 FGSG_07687 FGSG_08464 FGSG_08408 FGSG_08248 FGSG_08222 FGSG_13425 FGSG_08120 FGSG_09287 FGSG_09350 FGSG_13631 FGSG_10252 FGSG_10558 FGSG_17371 FGS…	649	4.69	1.10874	0.267474
43.01 fungal/microorganismic cell type differentiation	40	5.2	FGSG_01989 FGSG_02152 FGSG_02155 FGSG_02409 FGSG_15929 FGSG_15938 FGSG_15964 FGSG_16049 FGSG_04660 FGSG_04647 FGSG_04627 FGSG_04622 FGSG_04587 FGSG_03800 FGSG_12443 FGSG_03063 FGSG_16073 FGSG_16170 FGSG_12590 FGSG_04802 FGSG_05793 FGSG_16577 FGSG_06562 FGSG_07687 FGSG_08464 FGSG_08408 FGSG_08248 FGSG_08222 FGSG_13425 FGSG_08120 FGSG_09287 FGSG_09350 FGSG_13631 FGSG_10252 FGSG_10558 FGSG_17371 FGS…	649	4.69	1.10874	0.267474
43.01.03 fungal and other eukaryotic cell type differentiation	40	5.2	FGSG_01989 FGSG_02152 FGSG_02155 FGSG_02409 FGSG_15929 FGSG_15938 FGSG_15964 FGSG_16049 FGSG_04660 FGSG_04647 FGSG_04627 FGSG_04622 FGSG_04587 FGSG_03800 FGSG_12443 FGSG_03063 FGSG_16073 FGSG_16170 FGSG_12590 FGSG_04802 FGSG_05793 FGSG_16577 FGSG_06562 FGSG_07687 FGSG_08464 FGSG_08408 FGSG_08248 FGSG_08222 FGSG_13425 FGSG_08120 FGSG_09287 FGSG_09350 FGSG_13631 FGSG_10252 FGSG_10558 FGSG_17371 FGS…	649	4.69	1.10874	0.267474
43.01.03.05 budding, cell polarity and filament formation	6	0.78	FGSG_15929 FGSG_03063 FGSG_07687 FGSG_17464 FGSG_11448 FGSG_11363	293	2.11	0.369668	1
43.01.03.06 hyphae formation	2	0.26	FGSG_04647 FGSG_04627	23	0.16	1.625	0.36807
43.01.03.09 development of asco- basidio- or zygospore	7	0.91	FGSG_04627 FGSG_12443 FGSG_16577 FGSG_06562 FGSG_08464 FGSG_09287 FGSG_10252	196	1.41	0.64539	1
01.20.17.09 metabolism of alkaloids	6	0.78	FGSG_03593 FGSG_16111 FGSG_16205 FGSG_16864 FGSG_08824 FGSG_10611	31	0.22	3.54545	0.00642879

## Sheet: Axo_only_452 genes
FUNCTIONAL CATEGORY	abs SET	rel SET	genes SET	abs GENOME	rel GENOME	rel SET/rel GENOME	P-VALUE
01 METABOLISM	101	22.3	FGSG_00036 FGSG_11656 FGSG_00054 FGSG_00144 FGSG_00145 FGSG_11684 FGSG_00227 FGSG_01066 FGSG_01186 FGSG_01759 FGSG_01813 FGSG_01816 FGSG_02034 FGSG_02419 FGSG_15673 FGSG_15684 FGSG_15695 FGSG_15696 FGSG_15891 FGSG_11521 FGSG_11561 FGSG_16062 FGSG_16069 FGSG_04663 FGSG_04233 FGSG_03965 FGSG_03964 FGSG_03929 FGSG_03913 FGSG_03890 FGSG_12386 FGSG_03595 FGSG_03481 FGSG_03285 FGSG_03214 FGSG_03146 FGS…	3402	24.6	0.906504	0.88378
01.01 amino acid metabolism	24	5.3	FGSG_11656 FGSG_00144 FGSG_11684 FGSG_01066 FGSG_01813 FGSG_15673 FGSG_03929 FGSG_03481 FGSG_03214 FGSG_12518 FGSG_04790 FGSG_04901 FGSG_17048 FGSG_17087 FGSG_09101 FGSG_17196 FGSG_17365 FGSG_17408 FGSG_17444 FGSG_10913 FGSG_11317 FGSG_17541 FGSG_17542 FGSG_17631	649	4.69	1.13006	0.29478
99 UNCLASSIFIED PROTEINS	290	64.1	FGSG_00038 FGSG_11658 FGSG_00047 FGSG_00052 FGSG_00080 FGSG_11670 FGSG_11683 FGSG_15055 FGSG_11704 FGSG_11748 FGSG_00354 FGSG_11758 FGSG_00422 FGSG_11766 FGSG_11774 FGSG_11775 FGSG_15072 FGSG_15078 FGSG_11798 FGSG_11802 FGSG_00782 FGSG_15098 FGSG_01005 FGSG_01054 FGSG_01076 FGSG_15115 FGSG_01148 FGSG_15116 FGSG_15118 FGSG_15121 FGSG_01384 FGSG_01513 FGSG_01609 FGSG_11995 FGSG_01772 FGSG_01830 FGS…	7238	52.3	1.22562	1.67197e-07
01.01.03.01 metabolism of glutamine	1	0.22	FGSG_11656	16	0.11	2	0.412634
01.01.03.01.02 degradation of glutamine	1	0.22	FGSG_11656	9	0.06	3.66667	0.258614
01.01.03.02 metabolism of glutamate	3	0.66	FGSG_11656 FGSG_12518 FGSG_17542	63	0.45	1.46667	0.339713
01.01.03.02.01 biosynthesis of glutamate	2	0.44	FGSG_12518 FGSG_17542	41	0.29	1.51724	0.38955
01.02.07 regulation of nitrogen, sulfur and selenium metabolism	13	2.87	FGSG_00144 FGSG_01816 FGSG_03929 FGSG_03214 FGSG_16217 FGSG_17048 FGSG_17072 FGSG_09279 FGSG_09372 FGSG_09677 FGSG_10325 FGSG_10328 FGSG_17408	87	0.62	4.62903	4.62959e-06
01.01.03.03 metabolism of proline	2	0.44	FGSG_04901 FGSG_17196	26	0.18	2.44444	0.208263
01.01.03.03.02 degradation of proline	2	0.44	FGSG_04901 FGSG_17196	18	0.13	3.38462	0.115717
01.01.03.05 metabolism of arginine	3	0.66	FGSG_00144 FGSG_03481 FGSG_03214	48	0.34	1.94118	0.206628
01.01.03.05.01 biosynthesis of arginine	1	0.22	FGSG_03481	27	0.19	1.15789	0.592736
01.01.05 metabolism of urea cycle, creatine and polyamines	2	0.44	FGSG_01813 FGSG_10913	45	0.32	1.375	0.435357
01.01.05.03 metabolism of urea (urea cycle)	2	0.44	FGSG_01813 FGSG_10913	27	0.19	2.31579	0.220378
01.01.06 metabolism of the aspartate family	4	0.88	FGSG_01813 FGSG_03481 FGSG_12518 FGSG_17542	137	0.99	0.888889	1
01.01.06.01 metabolism of aspartate	2	0.44	FGSG_12518 FGSG_17542	25	0.18	2.44444	0.196222
01.01.06.01.01 biosynthesis of aspartate	2	0.44	FGSG_12518 FGSG_17542	13	0.09	4.88889	0.0655683
01.01.06.01.02 degradation of aspartate	2	0.44	FGSG_12518 FGSG_17542	15	0.1	4.4	0.0845957
01.01.06.02 metabolism of asparagine	2	0.44	FGSG_12518 FGSG_17542	13	0.09	4.88889	0.0655683
01.02.07.01 regulation of nitrogen metabolism	8	1.76	FGSG_01816 FGSG_03929 FGSG_16217 FGSG_09279 FGSG_09372 FGSG_09677 FGSG_10325 FGSG_10328	37	0.26	6.76923	2.05465e-05
01.01.06.06 metabolism of lysine	2	0.44	FGSG_01813 FGSG_03481	55	0.39	1.12821	0.541
01.01.06.06.01 biosynthesis of lysine	2	0.44	FGSG_01813 FGSG_03481	32	0.23	1.91304	0.281469
01.01.06.06.01.01 diaminopimelic acid pathway	2	0.44	FGSG_01813 FGSG_03481	15	0.1	4.4	0.0845957
01.01.09 metabolism of the cysteine - aromatic group	4	0.88	FGSG_11684 FGSG_17087 FGSG_17365 FGSG_17541	266	1.92	0.458333	1
01.01.09.02 metabolism of serine	1	0.22	FGSG_11684	48	0.34	0.647059	1
01.01.09.02.01 biosynthesis of serine	1	0.22	FGSG_11684	26	0.18	1.22222	0.578945
01.01.09.04 metabolism of phenylalanine	3	0.66	FGSG_17087 FGSG_17365 FGSG_17541	94	0.67	0.985075	1
01.01.09.04.01 biosynthesis of phenylalanine	3	0.66	FGSG_17087 FGSG_17365 FGSG_17541	61	0.44	1.5	0.321682
01.01.09.04.02 degradation of phenylalanine	3	0.66	FGSG_17087 FGSG_17365 FGSG_17541	64	0.46	1.43478	0.348718
01.02 nitrogen, sulfur and selenium metabolism	23	5.08	FGSG_00144 FGSG_01066 FGSG_01816 FGSG_03929 FGSG_03214 FGSG_12518 FGSG_16217 FGSG_07669 FGSG_08255 FGSG_08194 FGSG_17048 FGSG_17072 FGSG_09279 FGSG_09372 FGSG_09677 FGSG_10325 FGSG_10328 FGSG_17365 FGSG_17408 FGSG_17444 FGSG_10913 FGSG_17541 FGSG_17542	336	2.43	2.09053	0.0006967
02.16 fermentation	10	2.21	FGSG_01759 FGSG_02034 FGSG_16062 FGSG_03913 FGSG_12386 FGSG_03162 FGSG_03137 FGSG_16220 FGSG_16840 FGSG_10444	109	0.78	2.83333	0.00300068
01.02.02 nitrogen metabolism	2	0.44	FGSG_08194 FGSG_10913	63	0.45	0.977778	1
01.02.02.09 catabolism of nitrogenous compounds	2	0.44	FGSG_08194 FGSG_10913	28	0.2	2.2	0.232548
01.01.13 regulation of amino acid metabolism	7	1.54	FGSG_00144 FGSG_03929 FGSG_03214 FGSG_04901 FGSG_17048 FGSG_17196 FGSG_17408	68	0.49	3.14286	0.00662433
01.01.03 assimilation of ammonia, metabolism of the glutamate group	10	2.21	FGSG_11656 FGSG_00144 FGSG_03481 FGSG_03214 FGSG_12518 FGSG_04901 FGSG_17196 FGSG_17444 FGSG_11317 FGSG_17542	127	0.91	2.42857	0.00878152
02.16.01 alcohol fermentation	6	1.32	FGSG_01759 FGSG_02034 FGSG_16062 FGSG_03913 FGSG_12386 FGSG_16840	56	0.4	3.3	0.00963483
01.03 nucleotide/nucleoside/nucleobase metabolism	10	2.21	FGSG_11521 FGSG_03595 FGSG_03026 FGSG_06286 FGSG_08647 FGSG_17048 FGSG_10290 FGSG_17408 FGSG_10913 FGSG_17665	407	2.94	0.751701	1
01.03.01 purin nucleotide/nucleoside/nucleobase metabolism	4	0.88	FGSG_11521 FGSG_03595 FGSG_10913 FGSG_17665	149	1.07	0.82243	1
01.03.07 deoxyribonucleotide metabolism	1	0.22	FGSG_03026	24	0.17	1.29412	0.54995
01.03.13 regulation of nucleotide/nucleoside/nucleobase metabolism	2	0.44	FGSG_17048 FGSG_17408	30	0.21	2.09524	0.25699
01.03.16 polynucleotide degradation	1	0.22	FGSG_08647	119	0.86	0.255814	1
01.03.16.01 RNA degradation	1	0.22	FGSG_08647	69	0.49	0.44898	1
01.04 phosphate metabolism	9	1.99	FGSG_03595 FGSG_03146 FGSG_04957 FGSG_06141 FGSG_12884 FGSG_16497 FGSG_16710 FGSG_08647 FGSG_17665	601	4.34	0.458525	1
01.05 C-compound and carbohydrate metabolism	46	10.1	FGSG_00054 FGSG_00145 FGSG_11684 FGSG_00227 FGSG_01759 FGSG_02034 FGSG_02419 FGSG_15684 FGSG_15695 FGSG_15696 FGSG_15891 FGSG_16062 FGSG_04663 FGSG_03965 FGSG_03913 FGSG_03890 FGSG_12386 FGSG_03285 FGSG_03137 FGSG_16202 FGSG_16220 FGSG_04790 FGSG_04901 FGSG_05545 FGSG_12884 FGSG_07501 FGSG_13224 FGSG_13230 FGSG_07852 FGSG_13238 FGSG_16837 FGSG_16840 FGSG_17072 FGSG_09101 FGSG_09646 FGSG_10288 FGS…	1547	11.1	0.90991	1
01.05.02 sugar, glucoside, polyol and carboxylate metabolism	5	1.1	FGSG_03890 FGSG_05545 FGSG_13224 FGSG_16837 FGSG_11011	307	2.22	0.495495	1
01.05.02.04 sugar, glucoside, polyol and carboxylate anabolism	1	0.22	FGSG_11011	85	0.61	0.360656	1
01.05.02.07 sugar, glucoside, polyol and carboxylate catabolism	3	0.66	FGSG_03890 FGSG_13224 FGSG_11011	224	1.62	0.407407	1
01.05.03 polysaccharide metabolism	5	1.1	FGSG_15696 FGSG_04790 FGSG_16837 FGSG_09101 FGSG_11011	291	2.1	0.52381	1
01.05.03.03 chitin metabolism	1	0.22	FGSG_16837	31	0.22	1	1
01.05.03.03.07 chitin catabolism	1	0.22	FGSG_16837	14	0.1	2.2	0.372216
01.05.06 C-2 compound and organic acid metabolism	4	0.88	FGSG_00145 FGSG_01759 FGSG_02034 FGSG_16840	45	0.32	2.75	0.0586587
01.05.06.07 C-2 compound and organic acid catabolism	3	0.66	FGSG_01759 FGSG_02034 FGSG_16840	39	0.28	2.35714	0.134136
01.05.09 aminosaccharide metabolism	3	0.66	FGSG_04790 FGSG_16837 FGSG_09101	66	0.47	1.40426	0.366686
01.05.09.04 aminosaccharide anabolism	2	0.44	FGSG_04790 FGSG_09101	39	0.28	1.57143	0.366029
01.05.09.07 aminosaccharide catabolism	1	0.22	FGSG_16837	25	0.18	1.22222	0.564688
01.05.11 aromate metabolism	3	0.66	FGSG_15695 FGSG_09646 FGSG_11270	87	0.62	1.06452	0.544935
01.05.11.04 aromate anabolism	1	0.22	FGSG_09646	16	0.11	2	0.412634
01.05.11.07 aromate catabolism	3	0.66	FGSG_15695 FGSG_09646 FGSG_11270	62	0.44	1.5	0.330699
01.05.11.07.01 aerobic aromate catabolism	3	0.66	FGSG_15695 FGSG_09646 FGSG_11270	60	0.43	1.53488	0.312667
01.05.13 transfer of activated C-1 groups	1	0.22	FGSG_15891	84	0.6	0.366667	1
01.05.13.01 S-adenosyl-methionine - homocysteine cycle	1	0.22	FGSG_15891	33	0.23	0.956522	1
01.05.25 regulation of C-compound and carbohydrate metabolism	4	0.88	FGSG_00227 FGSG_15684 FGSG_04901 FGSG_17072	208	1.5	0.586667	1
01.06 lipid, fatty acid and isoprenoid metabolism	28	6.19	FGSG_00036 FGSG_11656 FGSG_00054 FGSG_00145 FGSG_01759 FGSG_02034 FGSG_11561 FGSG_16069 FGSG_04233 FGSG_03285 FGSG_16220 FGSG_16392 FGSG_12596 FGSG_04790 FGSG_05334 FGSG_05545 FGSG_07501 FGSG_07852 FGSG_08150 FGSG_17057 FGSG_17072 FGSG_17087 FGSG_09101 FGSG_11022 FGSG_10913 FGSG_11270 FGSG_11260 FGSG_17541	850	6.14	1.00814	0.512003
01.06.02 membrane lipid metabolism	4	0.88	FGSG_16392 FGSG_05545 FGSG_08150 FGSG_17057	156	1.12	0.785714	1
01.06.02.01 phospholipid metabolism	4	0.88	FGSG_16392 FGSG_05545 FGSG_08150 FGSG_17057	125	0.9	0.977778	1
01.06.05 fatty acid metabolism	9	1.99	FGSG_00036 FGSG_11656 FGSG_00145 FGSG_04790 FGSG_07501 FGSG_17087 FGSG_11022 FGSG_10913 FGSG_11260	157	1.13	1.76106	0.0725978
01.06.06 isoprenoid metabolism	7	1.54	FGSG_00054 FGSG_01759 FGSG_05334 FGSG_07852 FGSG_17087 FGSG_09101 FGSG_17541	184	1.33	1.15789	0.396165
01.06.06.05 sesquiterpenes metabolism	1	0.22	FGSG_17541	20	0.14	1.57143	0.485846
01.06.06.07 diterpenes metabolism	1	0.22	FGSG_05334	12	0.08	2.75	0.329024
01.06.06.11 tetracyclic and pentacyclic triterpenes (cholesterin, steroids and hopanoids) metabolism	4	0.88	FGSG_00054 FGSG_07852 FGSG_17087 FGSG_09101	136	0.98	0.897959	1
01.06.10 regulation of lipid, fatty acid and isoprenoid metabolism	1	0.22	FGSG_17072	39	0.28	0.785714	1
01.07 metabolism of vitamins, cofactors, and prosthetic groups	8	1.76	FGSG_00036 FGSG_00054 FGSG_01186 FGSG_01759 FGSG_16069 FGSG_03965 FGSG_16202 FGSG_04863	346	2.5	0.704	1
01.07.01 biosynthesis of vitamins, cofactors, and prosthetic groups	4	0.88	FGSG_00036 FGSG_01186 FGSG_01759 FGSG_16069	179	1.29	0.682171	1
01.20 secondary metabolism	21	4.64	FGSG_01186 FGSG_01816 FGSG_15673 FGSG_03965 FGSG_03964 FGSG_02908 FGSG_16202 FGSG_04790 FGSG_04863 FGSG_05334 FGSG_06498 FGSG_07501 FGSG_17087 FGSG_09086 FGSG_09279 FGSG_11022 FGSG_11460 FGSG_11270 FGSG_11260 FGSG_17541 FGSG_17575	627	4.53	1.02428	0.486743
01.20.05 metabolism of acetic acid derivatives	4	0.88	FGSG_03964 FGSG_04790 FGSG_17087 FGSG_11022	56	0.4	2.2	0.11008
32.07.07.03 glutathione conjugation reaction	3	0.66	FGSG_01816 FGSG_04863 FGSG_09279	15	0.1	6.6	0.011781
01.20.05.11 metabolism of polyketides	1	0.22	FGSG_03964	26	0.18	1.22222	0.578945
01.20.17 metabolism of secondary products derived from primary amino acids	1	0.22	FGSG_02908	96	0.69	0.318841	1
01.20.17.03 metabolism of amines	1	0.22	FGSG_02908	35	0.25	0.88	1
01.20.19 metabolism of secondary products derived from glycine, L-serine and L-alanine	1	0.22	FGSG_01186	32	0.23	0.956522	1
01.20.19.01 metabolism of porphyrins	1	0.22	FGSG_01186	25	0.18	1.22222	0.564688
01.20.33 metabolism of secondary products derived from L-tryptophan	1	0.22	FGSG_03965	15	0.1	2.2	0.392761
01.20.35 metabolism of secondary products derived from L-phenylalanine and L-tyrosine	3	0.66	FGSG_04863 FGSG_11460 FGSG_17575	68	0.49	1.34694	0.384567
01.20.35.01 metabolism of phenylpropanoids	2	0.44	FGSG_04863 FGSG_17575	62	0.44	1	1
01.20.35.01.01 metabolism of melanins	1	0.22	FGSG_17575	32	0.23	0.956522	1
01.20.37 metabolism of peptide derived compounds	4	0.88	FGSG_01816 FGSG_15673 FGSG_06498 FGSG_09279	60	0.43	2.04651	0.132495
01.20.05.09 metabolism of eicosanoids	3	0.66	FGSG_04790 FGSG_17087 FGSG_11022	17	0.12	5.5	0.0167768
01.20.37.03 metabolism of peptide antibiotics	1	0.22	FGSG_15673	20	0.14	1.57143	0.485846
01.25 extracellular metabolism	3	0.66	FGSG_15695 FGSG_16837 FGSG_09646	74	0.53	1.24528	0.437385
01.25.09 extracellular lignin degradation	2	0.44	FGSG_15695 FGSG_09646	13	0.09	4.88889	0.0655683
01.25.11 extracellular aminosaccharide degradation	1	0.22	FGSG_16837	3	0.02	11	0.0949114
02 ENERGY	16	3.53	FGSG_00145 FGSG_01759 FGSG_02034 FGSG_15696 FGSG_16062 FGSG_04663 FGSG_03913 FGSG_03890 FGSG_12386 FGSG_03162 FGSG_03137 FGSG_16220 FGSG_07501 FGSG_16840 FGSG_10444 FGSG_11460	609	4.4	0.802273	1
02.01 glycolysis and gluconeogenesis	5	1.1	FGSG_02034 FGSG_04663 FGSG_16840 FGSG_10444 FGSG_11460	112	0.81	1.35802	0.303954
02.07 pentose-phosphate pathway	1	0.22	FGSG_07501	47	0.33	0.666667	1
02.11 electron transport and membrane-associated energy conservation	2	0.44	FGSG_01759 FGSG_16220	166	1.2	0.366667	1
02.13 respiration	4	0.88	FGSG_00145 FGSG_01759 FGSG_03137 FGSG_16220	186	1.34	0.656716	1
02.13.03 aerobic respiration	1	0.22	FGSG_03137	107	0.77	0.285714	1
02.16.03 lactate fermentation	3	0.66	FGSG_03137 FGSG_16220 FGSG_10444	18	0.13	5.07692	0.0196532
01.01.06.02.01 biosynthesis of asparagine	2	0.44	FGSG_12518 FGSG_17542	7	0.05	8.8	0.0200814
32.07 detoxification	26	5.75	FGSG_01816 FGSG_02084 FGSG_02419 FGSG_12141 FGSG_15686 FGSG_15695 FGSG_03759 FGSG_03090 FGSG_16215 FGSG_04863 FGSG_05334 FGSG_05705 FGSG_06141 FGSG_13224 FGSG_16840 FGSG_16868 FGSG_08255 FGSG_17087 FGSG_09086 FGSG_09279 FGSG_09646 FGSG_17219 FGSG_10098 FGSG_17365 FGSG_11270 FGSG_17541	520	3.76	1.52926	0.0210513
02.19 metabolism of energy reserves (e.g. glycogen, trehalose)	2	0.44	FGSG_15696 FGSG_03890	52	0.37	1.18919	0.510761
10 CELL CYCLE AND DNA PROCESSING	17	3.76	FGSG_12426 FGSG_03146 FGSG_16272 FGSG_16392 FGSG_04790 FGSG_05949 FGSG_12884 FGSG_06286 FGSG_16492 FGSG_15029 FGSG_16710 FGSG_08647 FGSG_08150 FGSG_17072 FGSG_09389 FGSG_10290 FGSG_11022	1080	7.81	0.481434	1
10.01 DNA processing	10	2.21	FGSG_12426 FGSG_16272 FGSG_05949 FGSG_12884 FGSG_06286 FGSG_15029 FGSG_16710 FGSG_08647 FGSG_09389 FGSG_10290	595	4.3	0.513953	1
10.01.02 DNA topology	4	0.88	FGSG_12426 FGSG_16272 FGSG_05949 FGSG_08647	98	0.7	1.25714	0.399208
10.01.03 DNA synthesis and replication	3	0.66	FGSG_16272 FGSG_06286 FGSG_08647	144	1.04	0.634615	1
10.01.03.05 extension/ polymerization activity	1	0.22	FGSG_06286	47	0.33	0.666667	1
10.01.05 DNA recombination and DNA repair	9	1.99	FGSG_12426 FGSG_16272 FGSG_05949 FGSG_12884 FGSG_06286 FGSG_15029 FGSG_08647 FGSG_09389 FGSG_10290	309	2.23	0.892377	1
10.01.05.01 DNA repair	8	1.76	FGSG_12426 FGSG_16272 FGSG_12884 FGSG_06286 FGSG_15029 FGSG_08647 FGSG_09389 FGSG_10290	267	1.93	0.911917	1
10.01.05.03 DNA recombination	4	0.88	FGSG_12426 FGSG_16272 FGSG_05949 FGSG_08647	113	0.81	1.08642	0.507624
10.01.05.03.01 meiotic recombination	1	0.22	FGSG_05949	29	0.2	1.1	0.618981
10.01.09 DNA restriction or modification	3	0.66	FGSG_16272 FGSG_16710 FGSG_08647	282	2.03	0.325123	1
10.01.09.05 DNA conformation modification (e.g. chromatin)	3	0.66	FGSG_16272 FGSG_16710 FGSG_08647	274	1.98	0.333333	1
10.03 cell cycle	9	1.99	FGSG_03146 FGSG_16392 FGSG_04790 FGSG_05949 FGSG_16492 FGSG_16710 FGSG_08150 FGSG_17072 FGSG_11022	705	5.09	0.390963	1
10.03.01 mitotic cell cycle and cell cycle control	8	1.76	FGSG_03146 FGSG_16392 FGSG_04790 FGSG_16492 FGSG_16710 FGSG_08150 FGSG_17072 FGSG_11022	507	3.66	0.480874	1
10.03.01.01 mitotic cell cycle	1	0.22	FGSG_16492	203	1.46	0.150685	1
10.03.01.01.11 M phase	1	0.22	FGSG_16492	78	0.56	0.392857	1
10.03.02 meiosis	4	0.88	FGSG_16392 FGSG_05949 FGSG_16492 FGSG_08150	124	0.89	0.988764	1
10.03.02.01 meiosis I	1	0.22	FGSG_16492	11	0.07	3.14286	0.306328
10.03.03 cytokinesis (cell division) /septum formation and hydrolysis	2	0.44	FGSG_16492 FGSG_17072	169	1.22	0.360656	1
10.03.04 nuclear and chromosomal cycle	1	0.22	FGSG_16492	105	0.75	0.293333	1
10.03.04.05 chromosome segregation/division	1	0.22	FGSG_16492	57	0.41	0.536585	1
10.03.05 cell cycle dependent cytoskeleton reorganization	1	0.22	FGSG_16492	64	0.46	0.478261	1
10.03.05.01 spindle pole body/centrosome and microtubule cycle	1	0.22	FGSG_16492	52	0.37	0.594595	1
11 TRANSCRIPTION	30	6.63	FGSG_00144 FGSG_11684 FGSG_00227 FGSG_01816 FGSG_02750 FGSG_15684 FGSG_11521 FGSG_11561 FGSG_03929 FGSG_03214 FGSG_16217 FGSG_16392 FGSG_04901 FGSG_16424 FGSG_07198 FGSG_07504 FGSG_07852 FGSG_08647 FGSG_08150 FGSG_17048 FGSG_09279 FGSG_09372 FGSG_09389 FGSG_09677 FGSG_17196 FGSG_17217 FGSG_10325 FGSG_10328 FGSG_10533 FGSG_17408	1225	8.86	0.748307	1
11.02 RNA synthesis	29	6.41	FGSG_00144 FGSG_11684 FGSG_00227 FGSG_01816 FGSG_02750 FGSG_15684 FGSG_11521 FGSG_11561 FGSG_03929 FGSG_03214 FGSG_16217 FGSG_16392 FGSG_04901 FGSG_16424 FGSG_07198 FGSG_07504 FGSG_08647 FGSG_08150 FGSG_17048 FGSG_09279 FGSG_09372 FGSG_09389 FGSG_09677 FGSG_17196 FGSG_17217 FGSG_10325 FGSG_10328 FGSG_10533 FGSG_17408	960	6.94	0.923631	1
11.02.03 mRNA synthesis	29	6.41	FGSG_00144 FGSG_11684 FGSG_00227 FGSG_01816 FGSG_02750 FGSG_15684 FGSG_11521 FGSG_11561 FGSG_03929 FGSG_03214 FGSG_16217 FGSG_16392 FGSG_04901 FGSG_16424 FGSG_07198 FGSG_07504 FGSG_08647 FGSG_08150 FGSG_17048 FGSG_09279 FGSG_09372 FGSG_09389 FGSG_09677 FGSG_17196 FGSG_17217 FGSG_10325 FGSG_10328 FGSG_10533 FGSG_17408	880	6.36	1.00786	0.510358
11.02.03.01 general transcription activities	9	1.99	FGSG_00144 FGSG_01816 FGSG_11561 FGSG_03214 FGSG_04901 FGSG_17048 FGSG_09279 FGSG_17196 FGSG_17408	192	1.38	1.44203	0.177992
11.02.03.01.01 transcription initiation	1	0.22	FGSG_17408	48	0.34	0.647059	1
11.02.03.04 transcriptional control	26	5.75	FGSG_00144 FGSG_11684 FGSG_00227 FGSG_02750 FGSG_15684 FGSG_11521 FGSG_11561 FGSG_03929 FGSG_03214 FGSG_16217 FGSG_16392 FGSG_04901 FGSG_16424 FGSG_07198 FGSG_07504 FGSG_08647 FGSG_08150 FGSG_17048 FGSG_09372 FGSG_09389 FGSG_09677 FGSG_17196 FGSG_10325 FGSG_10328 FGSG_10533 FGSG_17408	765	5.53	1.03978	0.447757
11.02.03.04.01 transcription activation	6	1.32	FGSG_15684 FGSG_03929 FGSG_04901 FGSG_07198 FGSG_17048 FGSG_17408	189	1.36	0.970588	1
11.02.03.04.03 transcription repression	6	1.32	FGSG_11684 FGSG_16217 FGSG_09372 FGSG_09677 FGSG_10325 FGSG_10328	111	0.8	1.65	0.155874
11.04 RNA processing	2	0.44	FGSG_07852 FGSG_08647	442	3.19	0.137931	1
11.04.01 rRNA processing	1	0.22	FGSG_08647	187	1.35	0.162963	1
11.04.02 tRNA processing	1	0.22	FGSG_08647	64	0.46	0.478261	1
11.04.03 mRNA processing (splicing, 5^-, 3^-end processing)	2	0.44	FGSG_07852 FGSG_08647	277	2	0.22	1
11.04.03.01 splicing	1	0.22	FGSG_07852	214	1.54	0.142857	1
11.04.03.11 control of mRNA stability	1	0.22	FGSG_08647	29	0.2	1.1	0.618981
11.04.05 RNA topology	1	0.22	FGSG_08647	8	0.05	4.4	0.233542
12 PROTEIN SYNTHESIS	1	0.22	FGSG_08647	439	3.17	0.0694006	1
12.07 translational control	1	0.22	FGSG_08647	84	0.6	0.366667	1
14 PROTEIN FATE (folding, modification, destination)	13	2.87	FGSG_00036 FGSG_03881 FGSG_03595 FGSG_03146 FGSG_05545 FGSG_05829 FGSG_16492 FGSG_16497 FGSG_07852 FGSG_16710 FGSG_16920 FGSG_11317 FGSG_17665	1451	10.4	0.275962	1
14.04 protein targeting, sorting and translocation	1	0.22	FGSG_17665	314	2.27	0.0969163	1
14.07 protein modification	9	1.99	FGSG_00036 FGSG_03595 FGSG_03146 FGSG_05545 FGSG_05829 FGSG_16497 FGSG_16710 FGSG_16920 FGSG_11317	851	6.15	0.323577	1
14.07.01 modification with fatty acids (e.g. myristylation, palmitylation, farnesylation)	1	0.22	FGSG_05545	46	0.33	0.666667	1
14.07.02 modification with sugar residues (e.g. glycosylation, deglycosylation)	1	0.22	FGSG_03595	84	0.6	0.366667	1
14.07.03 modification by phosphorylation, dephosphorylation, autophosphorylation	3	0.66	FGSG_03146 FGSG_16497 FGSG_16710	251	1.81	0.364641	1
14.07.04 modification by acetylation, deacetylation	1	0.22	FGSG_11317	82	0.59	0.372881	1
14.10 assembly of protein complexes	2	0.44	FGSG_00036 FGSG_03595	251	1.81	0.243094	1
14.13 protein/peptide degradation	4	0.88	FGSG_03881 FGSG_05829 FGSG_16492 FGSG_07852	443	3.2	0.275	1
14.13.01 cytoplasmic and nuclear protein degradation	2	0.44	FGSG_16492 FGSG_07852	298	2.15	0.204651	1
16 PROTEIN WITH BINDING FUNCTION OR COFACTOR REQUIREMENT (structural or catalytic)	54	11.9	FGSG_00054 FGSG_00102 FGSG_00145 FGSG_11684 FGSG_00227 FGSG_01759 FGSG_02034 FGSG_16062 FGSG_16064 FGSG_04663 FGSG_04375 FGSG_03929 FGSG_03913 FGSG_03881 FGSG_03595 FGSG_03481 FGSG_12426 FGSG_12470 FGSG_03285 FGSG_03146 FGSG_03137 FGSG_12518 FGSG_16272 FGSG_04790 FGSG_05334 FGSG_05829 FGSG_05949 FGSG_06141 FGSG_06286 FGSG_16492 FGSG_16497 FGSG_06498 FGSG_15029 FGSG_07504 FGSG_07852 FGSG_16710 FGS…	3139	22.7	0.524229	1
16.01 protein binding	11	2.43	FGSG_11684 FGSG_04375 FGSG_03913 FGSG_04790 FGSG_05829 FGSG_16492 FGSG_16497 FGSG_07852 FGSG_08647 FGSG_11022 FGSG_17665	1601	11.5	0.211304	1
16.03 nucleic acid binding	17	3.76	FGSG_00102 FGSG_11684 FGSG_00227 FGSG_03929 FGSG_03881 FGSG_16272 FGSG_05949 FGSG_06286 FGSG_15029 FGSG_07504 FGSG_07852 FGSG_08647 FGSG_13458 FGSG_09389 FGSG_10290 FGSG_10533 FGSG_10599	811	5.86	0.641638	1
16.03.01 DNA binding	12	2.65	FGSG_00102 FGSG_11684 FGSG_00227 FGSG_03929 FGSG_16272 FGSG_05949 FGSG_06286 FGSG_07504 FGSG_08647 FGSG_09389 FGSG_10290 FGSG_10533	471	3.4	0.779412	1
16.03.03 RNA binding	3	0.66	FGSG_07852 FGSG_13458 FGSG_10599	327	2.36	0.279661	1
16.05 polysaccharide binding	1	0.22	FGSG_16837	38	0.27	0.814815	1
16.17 metal binding	17	3.76	FGSG_02034 FGSG_16062 FGSG_16064 FGSG_04663 FGSG_03913 FGSG_03881 FGSG_03481 FGSG_05829 FGSG_06286 FGSG_16497 FGSG_15029 FGSG_16710 FGSG_08647 FGSG_17087 FGSG_09389 FGSG_09681 FGSG_10290	758	5.48	0.686131	1
16.17.01 calcium binding	1	0.22	FGSG_16497	99	0.71	0.309859	1
16.17.07 magnesium binding	2	0.44	FGSG_06286 FGSG_16710	111	0.8	0.55	1
16.17.09 heavy metal binding (Cu, Fe, Zn)	13	2.87	FGSG_02034 FGSG_16062 FGSG_16064 FGSG_04663 FGSG_03913 FGSG_03881 FGSG_03481 FGSG_06286 FGSG_15029 FGSG_08647 FGSG_17087 FGSG_09389 FGSG_09681	499	3.6	0.797222	1
16.19 nucleotide/nucleoside/nucleobase binding	14	3.09	FGSG_03595 FGSG_12426 FGSG_12470 FGSG_03146 FGSG_16272 FGSG_05949 FGSG_06141 FGSG_16497 FGSG_16710 FGSG_08647 FGSG_17057 FGSG_11017 FGSG_10913 FGSG_17665	868	6.27	0.492823	1
16.19.03 ATP binding	9	1.99	FGSG_12426 FGSG_03146 FGSG_16272 FGSG_05949 FGSG_06141 FGSG_16497 FGSG_16710 FGSG_08647 FGSG_10913	660	4.77	0.417191	1
16.19.05 GTP binding	4	0.88	FGSG_03595 FGSG_12470 FGSG_11017 FGSG_17665	132	0.95	0.926316	1
16.21 complex cofactor/cosubstrate/vitamine binding	18	3.98	FGSG_00054 FGSG_00145 FGSG_11684 FGSG_01759 FGSG_03285 FGSG_03137 FGSG_12518 FGSG_04790 FGSG_05334 FGSG_06498 FGSG_17087 FGSG_09086 FGSG_09101 FGSG_10290 FGSG_10444 FGSG_11022 FGSG_10913 FGSG_17542	514	3.71	1.07278	0.416319
16.21.01 heme binding	3	0.66	FGSG_05334 FGSG_17087 FGSG_09086	91	0.65	1.01538	0.575559
16.21.05 FAD/FMN binding	2	0.44	FGSG_00145 FGSG_03137	151	1.09	0.40367	1
16.21.07 NAD/NADP binding	10	2.21	FGSG_00054 FGSG_11684 FGSG_01759 FGSG_03285 FGSG_03137 FGSG_04790 FGSG_06498 FGSG_09101 FGSG_10444 FGSG_11022	231	1.67	1.32335	0.225282
16.21.08 Fe/S binding	1	0.22	FGSG_10290	38	0.27	0.814815	1
16.21.15 biotin binding	1	0.22	FGSG_10913	8	0.05	4.4	0.233542
16.21.17 pyridoxal phosphate binding	2	0.44	FGSG_12518 FGSG_17542	63	0.45	0.977778	1
18 REGULATION OF METABOLISM AND PROTEIN FUNCTION	9	1.99	FGSG_00144 FGSG_11684 FGSG_01816 FGSG_03595 FGSG_03214 FGSG_03146 FGSG_16497 FGSG_16710 FGSG_09279	512	3.7	0.537838	1
18.01 regulation by	3	0.66	FGSG_03146 FGSG_16497 FGSG_16710	250	1.8	0.366667	1
18.01.01 regulation by modification	3	0.66	FGSG_03146 FGSG_16497 FGSG_16710	143	1.03	0.640777	1
18.02 regulation of protein activity	9	1.99	FGSG_00144 FGSG_11684 FGSG_01816 FGSG_03595 FGSG_03214 FGSG_03146 FGSG_16497 FGSG_16710 FGSG_09279	502	3.63	0.548209	1
18.02.01 enzymatic activity regulation / enzyme regulator	2	0.44	FGSG_03595 FGSG_16710	313	2.26	0.19469	1
18.02.01.01 enzyme activator	1	0.22	FGSG_03595	142	1.02	0.215686	1
18.02.09 regulator of transcription factor	5	1.1	FGSG_00144 FGSG_11684 FGSG_01816 FGSG_03214 FGSG_09279	106	0.76	1.44737	0.265911
20 CELLULAR TRANSPORT, TRANSPORT FACILITIES AND TRANSPORT ROUTES	53	11.7	FGSG_00144 FGSG_00145 FGSG_00345 FGSG_01066 FGSG_01759 FGSG_02084 FGSG_02208 FGSG_12141 FGSG_15686 FGSG_15990 FGSG_16064 FGSG_16069 FGSG_04215 FGSG_04023 FGSG_03913 FGSG_03759 FGSG_03595 FGSG_03476 FGSG_03330 FGSG_03214 FGSG_03162 FGSG_03137 FGSG_03090 FGSG_02992 FGSG_16077 FGSG_16215 FGSG_16220 FGSG_16282 FGSG_04957 FGSG_05334 FGSG_05705 FGSG_06141 FGSG_06498 FGSG_06513 FGSG_07502 FGSG_07584 FGS…	2007	14.5	0.806897	1
20.01 transported compounds (substrates)	50	11	FGSG_00145 FGSG_00345 FGSG_01066 FGSG_01759 FGSG_02084 FGSG_02208 FGSG_12141 FGSG_15686 FGSG_15990 FGSG_16064 FGSG_16069 FGSG_04215 FGSG_04023 FGSG_03913 FGSG_03759 FGSG_03595 FGSG_03476 FGSG_03330 FGSG_03162 FGSG_03137 FGSG_03090 FGSG_02992 FGSG_16077 FGSG_16215 FGSG_16220 FGSG_16282 FGSG_04957 FGSG_05334 FGSG_05705 FGSG_06141 FGSG_06498 FGSG_06513 FGSG_07502 FGSG_07584 FGSG_07669 FGSG_13413 FGS…	1597	11.5	0.956522	1
20.01.01 ion transport	10	2.21	FGSG_00345 FGSG_01066 FGSG_16064 FGSG_03162 FGSG_04957 FGSG_06141 FGSG_06513 FGSG_17072 FGSG_09681 FGSG_11030	321	2.32	0.952586	1
20.01.01.01 cation transport (H+, Na+, K+, Ca2+ , NH4+, etc.)	6	1.32	FGSG_16064 FGSG_06141 FGSG_06513 FGSG_17072 FGSG_09681 FGSG_11030	269	1.94	0.680412	1
20.01.01.01.01 heavy metal ion transport (Cu+, Fe3+, etc.)	5	1.1	FGSG_16064 FGSG_06141 FGSG_06513 FGSG_09681 FGSG_11030	99	0.71	1.5493	0.223081
20.01.01.01.01.01 siderophore-iron transport	1	0.22	FGSG_11030	41	0.29	0.758621	1
20.01.01.07 anion transport	4	0.88	FGSG_01066 FGSG_03162 FGSG_04957 FGSG_17072	65	0.47	1.87234	0.162873
20.01.01.07.05 sulfate/sulfite transport	1	0.22	FGSG_01066	7	0.05	4.4	0.207624
20.01.01.07.07 phosphate transport	1	0.22	FGSG_04957	21	0.15	1.46667	0.502679
20.01.03 C-compound and carbohydrate transport	16	3.53	FGSG_02208 FGSG_15990 FGSG_04215 FGSG_04023 FGSG_03476 FGSG_03330 FGSG_03162 FGSG_02992 FGSG_16077 FGSG_16282 FGSG_06141 FGSG_07669 FGSG_13413 FGSG_17072 FGSG_17156 FGSG_10288	332	2.4	1.47083	0.079017
20.01.03.03 C4-dicarboxylate transport (e.g. malate, succinate, fumarate)	1	0.22	FGSG_10288	18	0.13	1.69231	0.450455
20.01.07 amino acid/amino acid derivatives transport	4	0.88	FGSG_02208 FGSG_07502 FGSG_07669 FGSG_17543	120	0.86	1.02326	0.555196
20.01.09 peptide transport	1	0.22	FGSG_13470	22	0.15	1.46667	0.518962
20.01.10 protein transport	1	0.22	FGSG_03595	246	1.77	0.124294	1
20.01.11 amine / polyamine transport	4	0.88	FGSG_02208 FGSG_05705 FGSG_07669 FGSG_10098	58	0.41	2.14634	0.121063
20.01.13 lipid/fatty acid transport	6	1.32	FGSG_02084 FGSG_02208 FGSG_03759 FGSG_04957 FGSG_07669 FGSG_17543	141	1.01	1.30693	0.314364
20.01.15 electron transport	12	2.65	FGSG_00145 FGSG_01759 FGSG_16069 FGSG_03913 FGSG_03137 FGSG_16220 FGSG_05334 FGSG_06498 FGSG_17087 FGSG_09086 FGSG_17365 FGSG_17541	398	2.87	0.923345	1
20.01.23 allantoin and allantoate transport	4	0.88	FGSG_00345 FGSG_02992 FGSG_07584 FGSG_11139	75	0.54	1.62963	0.229888
20.01.25 vitamine/cofactor transport	4	0.88	FGSG_02992 FGSG_06141 FGSG_17072 FGSG_11139	97	0.7	1.25714	0.391777
20.01.26 neurotransmitter transport	2	0.44	FGSG_02208 FGSG_07669	46	0.33	1.33333	0.44652
20.01.27 drug/toxin transport	7	1.54	FGSG_12141 FGSG_15686 FGSG_03090 FGSG_16215 FGSG_05705 FGSG_17219 FGSG_10098	171	1.23	1.25203	0.326664
20.03 transport facilities	28	6.19	FGSG_00345 FGSG_01066 FGSG_02084 FGSG_02208 FGSG_15686 FGSG_15990 FGSG_16064 FGSG_04215 FGSG_04023 FGSG_03759 FGSG_03476 FGSG_03330 FGSG_03162 FGSG_03090 FGSG_02992 FGSG_16077 FGSG_16282 FGSG_05705 FGSG_06141 FGSG_07584 FGSG_07669 FGSG_13413 FGSG_13470 FGSG_17072 FGSG_09681 FGSG_17156 FGSG_10098 FGSG_11139	808	5.84	1.05993	0.402156
20.03.02 carrier (electrochemical potential-driven transport)	5	1.1	FGSG_04215 FGSG_03090 FGSG_05705 FGSG_07669 FGSG_10098	142	1.02	1.07843	0.497257
20.03.02.02 symporter	2	0.44	FGSG_04215 FGSG_07669	69	0.49	0.897959	1
20.03.02.02.01 proton driven symporter	1	0.22	FGSG_07669	50	0.36	0.611111	1
20.03.02.03 antiporter	3	0.66	FGSG_03090 FGSG_05705 FGSG_10098	75	0.54	1.22222	0.44603
20.03.02.03.01 proton driven antiporter	2	0.44	FGSG_05705 FGSG_10098	45	0.32	1.375	0.435357
20.03.22 transport ATPases	4	0.88	FGSG_02084 FGSG_16064 FGSG_03759 FGSG_09681	123	0.88	1	1
20.03.25 ABC transporters	2	0.44	FGSG_15686 FGSG_06141	106	0.76	0.578947	1
20.09 transport routes	28	6.19	FGSG_00144 FGSG_00345 FGSG_01066 FGSG_02208 FGSG_12141 FGSG_15686 FGSG_16064 FGSG_04215 FGSG_03595 FGSG_03214 FGSG_02992 FGSG_16215 FGSG_04957 FGSG_05705 FGSG_06513 FGSG_07584 FGSG_07669 FGSG_13470 FGSG_17072 FGSG_09681 FGSG_17156 FGSG_17219 FGSG_10098 FGSG_10288 FGSG_11139 FGSG_11030 FGSG_17543 FGSG_17665	1237	8.94	0.692394	1
20.09.04 mitochondrial transport	1	0.22	FGSG_17543	118	0.85	0.258824	1
20.09.07 vesicular transport (Golgi network, etc.)	3	0.66	FGSG_16064 FGSG_03595 FGSG_09681	267	1.93	0.341969	1
20.09.13 vacuolar/lysosomal transport	1	0.22	FGSG_17665	170	1.22	0.180328	1
20.09.16 cellular export and secretion	11	2.43	FGSG_00144 FGSG_12141 FGSG_15686 FGSG_16064 FGSG_03595 FGSG_03214 FGSG_16215 FGSG_05705 FGSG_09681 FGSG_17219 FGSG_10098	268	1.93	1.25907	0.262275
20.09.16.01 Type I protein secretion system (ABC-type transport systems)	1	0.22	FGSG_15686	39	0.28	0.785714	1
20.09.16.07 non-vesicular cellular export	1	0.22	FGSG_12141	6	0.04	5.5	0.180833
20.09.16.09 vesicular cellular export	2	0.44	FGSG_00144 FGSG_03214	45	0.32	1.375	0.435357
20.09.16.09.03 exocytosis	2	0.44	FGSG_00144 FGSG_03214	42	0.3	1.46667	0.401165
20.09.18 cellular import	17	3.76	FGSG_00345 FGSG_01066 FGSG_02208 FGSG_04215 FGSG_02992 FGSG_04957 FGSG_06513 FGSG_07584 FGSG_07669 FGSG_13470 FGSG_17072 FGSG_09681 FGSG_17156 FGSG_10288 FGSG_11139 FGSG_11030 FGSG_17543	519	3.75	1.00267	0.53241
20.09.18.07 non-vesicular cellular import	10	2.21	FGSG_00345 FGSG_01066 FGSG_04215 FGSG_02992 FGSG_07584 FGSG_13470 FGSG_17156 FGSG_10288 FGSG_11139 FGSG_17543	278	2.01	1.0995	0.42449
20.09.18.09 vesicular cellular import	1	0.22	FGSG_17072	125	0.9	0.244444	1
20.09.18.09.01 endocytosis	1	0.22	FGSG_17072	125	0.9	0.244444	1
30 CELLULAR COMMUNICATION/SIGNAL TRANSDUCTION MECHANISM	11	2.43	FGSG_15990 FGSG_03595 FGSG_12470 FGSG_03146 FGSG_16077 FGSG_16282 FGSG_04790 FGSG_16497 FGSG_16710 FGSG_11022 FGSG_11017	652	4.71	0.515924	1
30.01 cellular signalling	9	1.99	FGSG_15990 FGSG_03595 FGSG_12470 FGSG_03146 FGSG_16077 FGSG_16282 FGSG_16497 FGSG_16710 FGSG_11017	560	4.05	0.491358	1
30.01.05 enzyme mediated signal transduction	4	0.88	FGSG_03595 FGSG_03146 FGSG_16497 FGSG_16710	291	2.1	0.419048	1
30.01.05.01 protein kinase	3	0.66	FGSG_03146 FGSG_16497 FGSG_16710	138	0.99	0.666667	1
30.01.05.01.05 tyrosine kinase	1	0.22	FGSG_16710	13	0.09	2.44444	0.350978
30.01.05.01.06 serine/threonine kinase	3	0.66	FGSG_03146 FGSG_16497 FGSG_16710	77	0.55	1.2	0.46316
30.01.05.05 G-protein mediated signal transduction	1	0.22	FGSG_03595	128	0.92	0.23913	1
30.01.05.05.01 small GTPase mediated signal transduction	1	0.22	FGSG_03595	98	0.7	0.314286	1
30.01.09 second messenger mediated signal transduction	1	0.22	FGSG_16497	99	0.71	0.309859	1
30.01.09.03 Ca2+ mediated signal transduction	1	0.22	FGSG_16497	34	0.24	0.916667	1
30.05 transmembrane signal transduction	3	0.66	FGSG_04790 FGSG_16710 FGSG_11022	191	1.38	0.478261	1
30.05.01 receptor enzyme mediated signalling	2	0.44	FGSG_04790 FGSG_11022	71	0.51	0.862745	1
30.05.01.18 transmembrane receptor protein serine/threonine kinase signalling pathways	2	0.44	FGSG_04790 FGSG_11022	21	0.15	2.93333	0.149184
01.02.02.09.01 urea catabolism (not urea cycle)	2	0.44	FGSG_08194 FGSG_10913	8	0.05	8.8	0.026202
30.05.02 non-enzymatic receptor mediated signalling	3	0.66	FGSG_04790 FGSG_16710 FGSG_11022	86	0.62	1.06452	0.537081
30.05.02.24 G-protein coupled receptor signalling pathway	2	0.44	FGSG_04790 FGSG_11022	38	0.27	1.62963	0.354137
30.05.02.26 integrin receptor signalling pathway	1	0.22	FGSG_16710	13	0.09	2.44444	0.350978
32 CELL RESCUE, DEFENSE AND VIRULENCE	46	10.1	FGSG_01759 FGSG_01816 FGSG_02084 FGSG_02419 FGSG_12141 FGSG_15673 FGSG_15686 FGSG_15695 FGSG_15990 FGSG_04023 FGSG_03964 FGSG_03759 FGSG_03476 FGSG_12426 FGSG_03090 FGSG_16077 FGSG_16215 FGSG_16282 FGSG_16358 FGSG_04863 FGSG_05334 FGSG_05705 FGSG_06141 FGSG_12884 FGSG_06286 FGSG_06498 FGSG_15029 FGSG_07504 FGSG_13224 FGSG_16840 FGSG_16868 FGSG_08255 FGSG_17087 FGSG_09086 FGSG_09279 FGSG_09389 FGS…	1452	10.5	0.961905	1
32.01 stress response	11	2.43	FGSG_12426 FGSG_04863 FGSG_06141 FGSG_12884 FGSG_06286 FGSG_06498 FGSG_15029 FGSG_07504 FGSG_09389 FGSG_10290 FGSG_17408	697	5.04	0.482143	1
32.01.01 oxidative stress response	2	0.44	FGSG_04863 FGSG_06498	122	0.88	0.5	1
32.01.03 osmotic and salt stress response	1	0.22	FGSG_17408	90	0.65	0.338462	1
32.01.09 DNA damage response	5	1.1	FGSG_12426 FGSG_12884 FGSG_06286 FGSG_15029 FGSG_10290	145	1.04	1.05769	0.51579
32.05 disease, virulence and defense	20	4.42	FGSG_01759 FGSG_02419 FGSG_12141 FGSG_15673 FGSG_15686 FGSG_15990 FGSG_04023 FGSG_03964 FGSG_03476 FGSG_16077 FGSG_16215 FGSG_16282 FGSG_16358 FGSG_05334 FGSG_05705 FGSG_06141 FGSG_16868 FGSG_17219 FGSG_10098 FGSG_17665	507	3.66	1.20765	0.223286
32.05.01 resistance proteins	8	1.76	FGSG_12141 FGSG_15686 FGSG_16215 FGSG_06141 FGSG_16868 FGSG_17219 FGSG_10098 FGSG_17665	172	1.24	1.41935	0.201866
32.05.01.01 antibiotic resistance	1	0.22	FGSG_12141	10	0.07	3.14286	0.282867
32.05.03 defense related proteins	5	1.1	FGSG_01759 FGSG_02419 FGSG_15673 FGSG_05334 FGSG_17665	92	0.66	1.66667	0.182629
32.05.05 virulence, disease factors	8	1.76	FGSG_15673 FGSG_15990 FGSG_03964 FGSG_03476 FGSG_16077 FGSG_16282 FGSG_16358 FGSG_05705	222	1.6	1.1	0.440514
32.05.05.01 toxins	3	0.66	FGSG_15673 FGSG_03964 FGSG_05705	62	0.44	1.5	0.330699
01.01.03.02.02 degradation of glutamate	3	0.66	FGSG_11656 FGSG_12518 FGSG_17542	21	0.15	4.4	0.0298081
32.07.01 detoxification involving cytochrome P450	7	1.54	FGSG_02419 FGSG_05334 FGSG_08255 FGSG_17087 FGSG_09086 FGSG_17365 FGSG_17541	111	0.8	1.925	0.071557
32.07.03 detoxification by modification	2	0.44	FGSG_04863 FGSG_16868	60	0.43	1.02326	0.588455
32.07.05 detoxification by export	7	1.54	FGSG_12141 FGSG_15686 FGSG_03090 FGSG_16215 FGSG_05705 FGSG_17219 FGSG_10098	139	1	1.54	0.170492
32.07.07 oxygen and radical detoxification	3	0.66	FGSG_01816 FGSG_04863 FGSG_09279	68	0.49	1.34694	0.384567
01.20.37.01 metabolism of thioredoxin, glutaredoxin, glutathion	3	0.66	FGSG_01816 FGSG_06498 FGSG_09279	21	0.15	4.4	0.0298081
32.07.09 detoxification by degradation	3	0.66	FGSG_15695 FGSG_13224 FGSG_09646	38	0.27	2.44444	0.126714
32.10 degradation / modification of foreign (exogenous) compounds	2	0.44	FGSG_13224 FGSG_11011	77	0.55	0.8	1
32.10.07 degradation / modification of foreign (exogenous) polysaccharides	1	0.22	FGSG_11011	31	0.22	1	1
34 INTERACTION WITH THE ENVIRONMENT	16	3.53	FGSG_01066 FGSG_01816 FGSG_16064 FGSG_04375 FGSG_16202 FGSG_05705 FGSG_06141 FGSG_06513 FGSG_07502 FGSG_17087 FGSG_09279 FGSG_09681 FGSG_17408 FGSG_11030 FGSG_17543 FGSG_17665	832	6.01	0.587354	1
34.01 homeostasis	5	1.1	FGSG_01066 FGSG_16064 FGSG_06513 FGSG_09681 FGSG_11030	336	2.43	0.452675	1
34.01.01 homeostasis of cations	4	0.88	FGSG_16064 FGSG_06513 FGSG_09681 FGSG_11030	290	2.09	0.421053	1
34.01.01.01 homeostasis of metal ions (Na, K, Ca etc.)	4	0.88	FGSG_16064 FGSG_06513 FGSG_09681 FGSG_11030	208	1.5	0.586667	1
34.01.03 homeostasis of anions	1	0.22	FGSG_01066	36	0.26	0.846154	1
34.01.03.01 homeostasis of sulfate	1	0.22	FGSG_01066	6	0.04	5.5	0.180833
34.05 cell motility	1	0.22	FGSG_04375	138	0.99	0.222222	1
34.05.01 cell migration	1	0.22	FGSG_04375	84	0.6	0.366667	1
34.11 cellular sensing and response to external stimulus	10	2.21	FGSG_01816 FGSG_16202 FGSG_05705 FGSG_06141 FGSG_07502 FGSG_17087 FGSG_09279 FGSG_17408 FGSG_17543 FGSG_17665	350	2.53	0.873518	1
34.11.01 photoperception and response	1	0.22	FGSG_16202	41	0.29	0.758621	1
34.11.03 chemoperception and response	6	1.32	FGSG_01816 FGSG_05705 FGSG_06141 FGSG_09279 FGSG_17408 FGSG_17543	165	1.19	1.10924	0.454371
34.11.03.13 osmosensing and response	2	0.44	FGSG_17408 FGSG_17543	79	0.57	0.77193	1
34.11.10 response to biotic stimulus	1	0.22	FGSG_17665	17	0.12	1.83333	0.431858
34.11.12 perception of nutrients and nutritional adaptation	2	0.44	FGSG_07502 FGSG_17087	88	0.63	0.698413	1
40 CELL FATE	3	0.66	FGSG_04375 FGSG_16492 FGSG_16497	548	3.96	0.166667	1
40.01 cell growth / morphogenesis	2	0.44	FGSG_04375 FGSG_16497	383	2.77	0.158845	1
40.01.03 directional cell growth (morphogenesis)	1	0.22	FGSG_04375	141	1.01	0.217822	1
40.01.03.03 guidance of longitudinal cell extension (e.g. pollen tube guidance, axonal pathfinding)	1	0.22	FGSG_04375	65	0.47	0.468085	1
40.10 cell death	2	0.44	FGSG_16492 FGSG_16497	163	1.17	0.376068	1
40.10.02 apoptosis (type I programmed cell death)	2	0.44	FGSG_16492 FGSG_16497	150	1.08	0.407407	1
41 DEVELOPMENT (Systemic)	4	0.88	FGSG_00102 FGSG_12470 FGSG_09086 FGSG_11017	98	0.7	1.25714	0.399208
41.01 fungal/microorganismic development	4	0.88	FGSG_00102 FGSG_12470 FGSG_09086 FGSG_11017	98	0.7	1.25714	0.399208
41.01.03 tissue pattern formation	2	0.44	FGSG_00102 FGSG_09086	17	0.12	3.66667	0.105043
41.01.03.01 fruit body development (sexually or asexually derived spores)	2	0.44	FGSG_00102 FGSG_09086	15	0.1	4.4	0.0845957
42 BIOGENESIS OF CELLULAR COMPONENTS	12	2.65	FGSG_01759 FGSG_03881 FGSG_03664 FGSG_12426 FGSG_03137 FGSG_16220 FGSG_05545 FGSG_16492 FGSG_07852 FGSG_16710 FGSG_08647 FGSG_11011	1165	8.42	0.314727	1
42.01 cell wall	3	0.66	FGSG_03664 FGSG_05545 FGSG_11011	276	1.99	0.331658	1
42.04 cytoskeleton/structural proteins	1	0.22	FGSG_16492	303	2.19	0.100457	1
42.04.05 microtubule cytoskeleton	1	0.22	FGSG_16492	78	0.56	0.392857	1
42.10 nucleus	3	0.66	FGSG_12426 FGSG_16710 FGSG_08647	300	2.16	0.305556	1
42.10.03 organization of chromosome structure	3	0.66	FGSG_12426 FGSG_16710 FGSG_08647	260	1.88	0.351064	1
42.16 mitochondrion	4	0.88	FGSG_01759 FGSG_03137 FGSG_16220 FGSG_07852	180	1.3	0.676923	1
42.29 bud / growth tip	1	0.22	FGSG_03881	31	0.22	1	1
43 CELL TYPE DIFFERENTIATION	14	3.09	FGSG_12017 FGSG_15990 FGSG_11543 FGSG_16045 FGSG_12378 FGSG_12470 FGSG_16077 FGSG_16282 FGSG_16392 FGSG_08150 FGSG_11017 FGSG_11011 FGSG_17576 FGSG_17705	649	4.69	0.658849	1
43.01 fungal/microorganismic cell type differentiation	14	3.09	FGSG_12017 FGSG_15990 FGSG_11543 FGSG_16045 FGSG_12378 FGSG_12470 FGSG_16077 FGSG_16282 FGSG_16392 FGSG_08150 FGSG_11017 FGSG_11011 FGSG_17576 FGSG_17705	649	4.69	0.658849	1
43.01.03 fungal and other eukaryotic cell type differentiation	14	3.09	FGSG_12017 FGSG_15990 FGSG_11543 FGSG_16045 FGSG_12378 FGSG_12470 FGSG_16077 FGSG_16282 FGSG_16392 FGSG_08150 FGSG_11017 FGSG_11011 FGSG_17576 FGSG_17705	649	4.69	0.658849	1
43.01.03.05 budding, cell polarity and filament formation	3	0.66	FGSG_12470 FGSG_11017 FGSG_11011	293	2.11	0.312796	1
43.01.03.09 development of asco- basidio- or zygospore	2	0.44	FGSG_16392 FGSG_08150	196	1.41	0.312057	1
30.05.01.18.01 TGF-beta-receptor signalling pathway	2	0.44	FGSG_04790 FGSG_11022	11	0.07	6.28571	0.0482516

## Sheet: Patho_Sapro_418 genes
FUNCTIONAL CATEGORY	abs SET	rel SET	genes SET	abs GENOME	rel GENOME	rel SET/rel GENOME	P-VALUE
20.09.18.07 non-vesicular cellular import	35	8.37	FGSG_00067 FGSG_00539 FGSG_01484 FGSG_02070 FGSG_02358 FGSG_15788 FGSG_15965 FGSG_04658 FGSG_04610 FGSG_04431 FGSG_04217 FGSG_03987 FGSG_03646 FGSG_03306 FGSG_03272 FGSG_03083 FGSG_02839 FGSG_05238 FGSG_05720 FGSG_05802 FGSG_16634 FGSG_07209 FGSG_07350 FGSG_07543 FGSG_07631 FGSG_07936 FGSG_08014 FGSG_09052 FGSG_10483 FGSG_10506 FGSG_13866 FGSG_11029 FGSG_10921 FGSG_11367 FGSG_11339	278	2.01	4.16418	7.10155e-13
01.01 amino acid metabolism	21	5.02	FGSG_01809 FGSG_02206 FGSG_02251 FGSG_02379 FGSG_02392 FGSG_11528 FGSG_03936 FGSG_03801 FGSG_12390 FGSG_03647 FGSG_03589 FGSG_03154 FGSG_03034 FGSG_04970 FGSG_07765 FGSG_16843 FGSG_09521 FGSG_09883 FGSG_11008 FGSG_11348 FGSG_17574	649	4.69	1.07036	0.405856
01.01.03 assimilation of ammonia, metabolism of the glutamate group	2	0.47	FGSG_02206 FGSG_03936	127	0.91	0.516484	1
01.01.03.02 metabolism of glutamate	1	0.23	FGSG_03936	63	0.45	0.511111	1
01.01.03.02.02 degradation of glutamate	1	0.23	FGSG_03936	21	0.15	1.53333	0.475421
01.01.03.03 metabolism of proline	1	0.23	FGSG_02206	26	0.18	1.27778	0.550184
01.01.03.03.01 biosynthesis of proline	1	0.23	FGSG_02206	10	0.07	3.28571	0.264419
01.01.03.03.02 degradation of proline	1	0.23	FGSG_02206	18	0.13	1.76923	0.42474
01.01.03.05 metabolism of arginine	1	0.23	FGSG_02206	48	0.34	0.676471	1
01.01.03.05.01 biosynthesis of arginine	1	0.23	FGSG_02206	27	0.19	1.21053	0.563809
01.01.03.05.02 degradation of arginine	1	0.23	FGSG_02206	14	0.1	2.3	0.349488
01.01.05 metabolism of urea cycle, creatine and polyamines	4	0.95	FGSG_02206 FGSG_02392 FGSG_03647 FGSG_09521	45	0.32	2.96875	0.0463707
01.01.05.01 metabolism of polyamines	2	0.47	FGSG_02206 FGSG_02392	17	0.12	3.91667	0.0920135
01.01.05.01.01 biosynthesis of polyamines	1	0.23	FGSG_02206	5	0.03	7.66667	0.142316
01.01.05.01.02 degradation of polyamines	1	0.23	FGSG_02392	10	0.07	3.28571	0.264419
01.01.05.03 metabolism of urea (urea cycle)	2	0.47	FGSG_03647 FGSG_09521	27	0.19	2.47368	0.195937
01.01.06 metabolism of the aspartate family	4	0.95	FGSG_02251 FGSG_03647 FGSG_03154 FGSG_09521	137	0.99	0.959596	1
01.01.06.06 metabolism of lysine	4	0.95	FGSG_02251 FGSG_03647 FGSG_03154 FGSG_09521	55	0.39	2.4359	0.0843084
01.01.06.06.01 biosynthesis of lysine	3	0.71	FGSG_02251 FGSG_03647 FGSG_09521	32	0.23	3.08696	0.071345
01.01.06.06.01.01 diaminopimelic acid pathway	2	0.47	FGSG_03647 FGSG_09521	15	0.1	4.7	0.0738733
01.01.06.06.01.03 aminoadipic acid pathway	1	0.23	FGSG_02251	14	0.1	2.3	0.349488
01.01.06.06.02 degradation of lysine	1	0.23	FGSG_03154	20	0.14	1.64286	0.459043
01.01.09 metabolism of the cysteine - aromatic group	12	2.87	FGSG_01809 FGSG_11528 FGSG_03936 FGSG_03801 FGSG_12390 FGSG_03589 FGSG_03154 FGSG_03034 FGSG_07765 FGSG_16843 FGSG_09883 FGSG_11008	266	1.92	1.49479	0.109523
01.01.09.01 metabolism of glycine	5	1.19	FGSG_12390 FGSG_03154 FGSG_03034 FGSG_16843 FGSG_11008	48	0.34	3.5	0.0145277
01.05 C-compound and carbohydrate metabolism	91	21.7	FGSG_00783 FGSG_00989 FGSG_01531 FGSG_01603 FGSG_01809 FGSG_01829 FGSG_02033 FGSG_02059 FGSG_02160 FGSG_02358 FGSG_02392 FGSG_02615 FGSG_02632 FGSG_02678 FGSG_15788 FGSG_15965 FGSG_16066 FGSG_04677 FGSG_04610 FGSG_04603 FGSG_04599 FGSG_04430 FGSG_04302 FGSG_04214 FGSG_04092 FGSG_03936 FGSG_03930 FGSG_03905 FGSG_03842 FGSG_12390 FGSG_03645 FGSG_03624 FGSG_03589 FGSG_03462 FGSG_03451 FGSG_03366 FGS…	1547	11.1	1.95495	2.08207e-10
01.01.09.04 metabolism of phenylalanine	3	0.71	FGSG_01809 FGSG_03589 FGSG_07765	94	0.67	1.0597	0.54418
01.01.09.04.01 biosynthesis of phenylalanine	2	0.47	FGSG_03589 FGSG_07765	61	0.44	1.06818	0.554501
01.01.09.04.02 degradation of phenylalanine	2	0.47	FGSG_03589 FGSG_07765	64	0.46	1.02174	0.580695
01.01.09.05 metabolism of tyrosine	4	0.95	FGSG_01809 FGSG_11528 FGSG_03936 FGSG_03801	64	0.46	2.06522	0.127998
01.01.09.05.02 degradation of tyrosine	2	0.47	FGSG_11528 FGSG_03801	33	0.23	2.04348	0.263333
01.01.11 metabolism of the pyruvate family (alanine, isoleucine, leucine, valine) and D-alanine	1	0.23	FGSG_02379	65	0.47	0.489362	1
01.01.11.04 metabolism of leucine	1	0.23	FGSG_02379	31	0.22	1.04545	0.614313
01.01.11.04.01 biosynthesis of leucine	1	0.23	FGSG_02379	21	0.15	1.53333	0.475421
01.01.11.04.02 degradation of leucine	1	0.23	FGSG_02379	19	0.13	1.76923	0.442155
01.02 nitrogen, sulfur and selenium metabolism	6	1.43	FGSG_00116 FGSG_05919 FGSG_07606 FGSG_07765 FGSG_09351 FGSG_11038	336	2.43	0.588477	1
01.02.02 nitrogen metabolism	1	0.23	FGSG_07606	63	0.45	0.511111	1
01.03 nucleotide/nucleoside/nucleobase metabolism	5	1.19	FGSG_02069 FGSG_02288 FGSG_02486 FGSG_16329 FGSG_16669	407	2.94	0.404762	1
01.03.01 purin nucleotide/nucleoside/nucleobase metabolism	3	0.71	FGSG_02069 FGSG_02486 FGSG_16669	149	1.07	0.663551	1
01.03.01.01 purine nucleotide /nucleoside/nucleobase catabolism	1	0.23	FGSG_02069	12	0.08	2.875	0.308257
01.03.04 pyrimidine nucleotide/nucleoside/nucleobase metabolism	1	0.23	FGSG_02069	81	0.58	0.396552	1
01.03.04.01 pyrimidine nucleotide/nucleoside/nucleobase catabolism	1	0.23	FGSG_02069	9	0.06	3.83333	0.241472
01.03.10 metabolism of cyclic and unusual nucleotides	1	0.23	FGSG_02069	23	0.16	1.4375	0.506709
01.03.16 polynucleotide degradation	1	0.23	FGSG_02288	119	0.86	0.267442	1
01.04 phosphate metabolism	10	2.39	FGSG_03366 FGSG_03247 FGSG_02847 FGSG_16329 FGSG_05062 FGSG_05889 FGSG_07375 FGSG_16878 FGSG_09728 FGSG_17372	601	4.34	0.550691	1
20.09.18 cellular import	44	10.5	FGSG_00067 FGSG_00116 FGSG_00539 FGSG_01484 FGSG_02070 FGSG_02358 FGSG_02426 FGSG_15788 FGSG_15864 FGSG_15893 FGSG_15965 FGSG_04658 FGSG_04610 FGSG_04431 FGSG_04217 FGSG_03987 FGSG_03646 FGSG_03306 FGSG_03272 FGSG_12485 FGSG_03172 FGSG_03083 FGSG_02839 FGSG_16329 FGSG_05238 FGSG_05720 FGSG_05802 FGSG_16634 FGSG_07209 FGSG_07350 FGSG_07543 FGSG_07631 FGSG_07936 FGSG_16878 FGSG_08014 FGSG_09052 FGS…	519	3.75	2.8	5.74608e-10
20.01.03 C-compound and carbohydrate transport	32	7.65	FGSG_00067 FGSG_00116 FGSG_01484 FGSG_02070 FGSG_02358 FGSG_15788 FGSG_15893 FGSG_15965 FGSG_04658 FGSG_04610 FGSG_04431 FGSG_03930 FGSG_03306 FGSG_03272 FGSG_03083 FGSG_05720 FGSG_05802 FGSG_05882 FGSG_07350 FGSG_07543 FGSG_07631 FGSG_07936 FGSG_16878 FGSG_08014 FGSG_09052 FGSG_09191 FGSG_10483 FGSG_10506 FGSG_13866 FGSG_10921 FGSG_11367 FGSG_11339	332	2.4	3.1875	6.95444e-09
01.05.02.04 sugar, glucoside, polyol and carboxylate anabolism	2	0.47	FGSG_16511 FGSG_07692	85	0.61	0.770492	1
01.05.03 polysaccharide metabolism	28	6.69	FGSG_00783 FGSG_02059 FGSG_02632 FGSG_16066 FGSG_04430 FGSG_03842 FGSG_03462 FGSG_12461 FGSG_03003 FGSG_04872 FGSG_04953 FGSG_16623 FGSG_06445 FGSG_06452 FGSG_06463 FGSG_06605 FGSG_07542 FGSG_07551 FGSG_08797 FGSG_09085 FGSG_09291 FGSG_10411 FGSG_10561 FGSG_11184 FGSG_11169 FGSG_11049 FGSG_11048 FGSG_11468	291	2.1	3.18571	6.49818e-08
20.03 transport facilities	49	11.7	FGSG_00067 FGSG_00116 FGSG_01484 FGSG_01809 FGSG_02070 FGSG_02358 FGSG_02426 FGSG_15788 FGSG_15864 FGSG_15893 FGSG_15965 FGSG_04658 FGSG_04610 FGSG_04431 FGSG_04245 FGSG_04240 FGSG_04217 FGSG_03930 FGSG_03772 FGSG_03646 FGSG_03306 FGSG_03272 FGSG_03172 FGSG_03083 FGSG_02847 FGSG_02839 FGSG_04876 FGSG_05238 FGSG_05720 FGSG_05802 FGSG_05882 FGSG_05889 FGSG_16634 FGSG_16640 FGSG_07209 FGSG_07350 FGS…	808	5.84	2.00342	2.41038e-06
01.05.03.03 chitin metabolism	1	0.23	FGSG_10561	31	0.22	1.04545	0.614313
01.05.03.03.07 chitin catabolism	1	0.23	FGSG_10561	14	0.1	2.3	0.349488
01.05.05 C-1 compound metabolism	2	0.47	FGSG_04603 FGSG_02970	25	0.18	2.61111	0.173956
01.05.05.04 C-1 compound anabolism	1	0.23	FGSG_04603	6	0.04	5.75	0.168255
01.05.05.07 C-1 compound catabolism	2	0.47	FGSG_04603 FGSG_02970	17	0.12	3.91667	0.0920135
01.05.06 C-2 compound and organic acid metabolism	4	0.95	FGSG_01531 FGSG_02160 FGSG_02392 FGSG_10126	45	0.32	2.96875	0.0463707
01.05.06.07 C-2 compound and organic acid catabolism	3	0.71	FGSG_02160 FGSG_02392 FGSG_10126	39	0.28	2.53571	0.113016
01.05.07 C-3 compound metabolism	1	0.23	FGSG_03247	8	0.05	4.6	0.21781
01.05.09 aminosaccharide metabolism	3	0.71	FGSG_02059 FGSG_07692 FGSG_11169	66	0.47	1.51064	0.322007
01.05.09.07 aminosaccharide catabolism	1	0.23	FGSG_07692	25	0.18	1.27778	0.536134
01.05.10 aliphatic hydrocarbon metabolism	1	0.23	FGSG_05919	5	0.03	7.66667	0.142316
01.05.10.07 aliphatic hydrocarbon catabolism	1	0.23	FGSG_05919	5	0.03	7.66667	0.142316
01.05.11 aromate metabolism	6	1.43	FGSG_04302 FGSG_03163 FGSG_16309 FGSG_17076 FGSG_11196 FGSG_17446	87	0.62	2.30645	0.047997
01.05.11.07 aromate catabolism	5	1.19	FGSG_04302 FGSG_03163 FGSG_16309 FGSG_17076 FGSG_17446	62	0.44	2.70455	0.0391008
01.05.11.07.01 aerobic aromate catabolism	5	1.19	FGSG_04302 FGSG_03163 FGSG_16309 FGSG_17076 FGSG_17446	60	0.43	2.76744	0.0346311
20.01 transported compounds (substrates)	78	18.6	FGSG_00067 FGSG_00116 FGSG_00539 FGSG_01484 FGSG_01531 FGSG_02070 FGSG_02160 FGSG_02251 FGSG_02358 FGSG_02379 FGSG_02392 FGSG_02426 FGSG_15713 FGSG_15788 FGSG_15864 FGSG_15893 FGSG_15965 FGSG_04658 FGSG_04610 FGSG_04431 FGSG_04245 FGSG_04240 FGSG_04217 FGSG_04092 FGSG_03987 FGSG_03936 FGSG_03930 FGSG_03772 FGSG_12390 FGSG_03646 FGSG_03366 FGSG_03306 FGSG_03272 FGSG_12485 FGSG_03172 FGSG_03154 FGS…	1597	11.5	1.61739	1.07416e-05
01.05.13 transfer of activated C-1 groups	2	0.47	FGSG_04092 FGSG_07606	84	0.6	0.783333	1
01.05.13.01 S-adenosyl-methionine - homocysteine cycle	1	0.23	FGSG_07606	33	0.23	1	0.637333
01.05.25 regulation of C-compound and carbohydrate metabolism	4	0.95	FGSG_03930 FGSG_16228 FGSG_16878 FGSG_17662	208	1.5	0.633333	1
01.06 lipid, fatty acid and isoprenoid metabolism	28	6.69	FGSG_01531 FGSG_01603 FGSG_02160 FGSG_02379 FGSG_02392 FGSG_15788 FGSG_15918 FGSG_04599 FGSG_04092 FGSG_03936 FGSG_03438 FGSG_03247 FGSG_03163 FGSG_05919 FGSG_16532 FGSG_07080 FGSG_07375 FGSG_07765 FGSG_08014 FGSG_10126 FGSG_13737 FGSG_10672 FGSG_11196 FGSG_11174 FGSG_11044 FGSG_11038 FGSG_11305 FGSG_11295	850	6.14	1.08958	0.345713
01.06.02 membrane lipid metabolism	2	0.47	FGSG_03247 FGSG_11174	156	1.12	0.419643	1
01.06.02.01 phospholipid metabolism	2	0.47	FGSG_03247 FGSG_11174	125	0.9	0.522222	1
01.06.05 fatty acid metabolism	9	2.15	FGSG_01531 FGSG_02379 FGSG_15918 FGSG_04599 FGSG_03438 FGSG_13737 FGSG_10672 FGSG_11174 FGSG_11295	157	1.13	1.90265	0.0490356
01.06.06 isoprenoid metabolism	6	1.43	FGSG_02392 FGSG_04092 FGSG_16532 FGSG_07765 FGSG_11044 FGSG_11038	184	1.33	1.07519	0.48391
01.06.06.05 sesquiterpenes metabolism	2	0.47	FGSG_07765 FGSG_11038	20	0.14	3.35714	0.121273
01.06.06.11 tetracyclic and pentacyclic triterpenes (cholesterin, steroids and hopanoids) metabolism	3	0.71	FGSG_04092 FGSG_16532 FGSG_11044	136	0.98	0.72449	1
01.06.10 regulation of lipid, fatty acid and isoprenoid metabolism	1	0.23	FGSG_11305	39	0.28	0.821429	1
01.07 metabolism of vitamins, cofactors, and prosthetic groups	12	2.87	FGSG_00539 FGSG_02392 FGSG_04092 FGSG_03366 FGSG_03354 FGSG_03154 FGSG_03114 FGSG_04966 FGSG_07375 FGSG_10126 FGSG_11029 FGSG_17446	346	2.5	1.148	0.354762
01.07.01 biosynthesis of vitamins, cofactors, and prosthetic groups	3	0.71	FGSG_02392 FGSG_07375 FGSG_10126	179	1.29	0.550388	1
01.07.04 utilization of vitamins, cofactors, and prosthetic groups	2	0.47	FGSG_03366 FGSG_17446	20	0.14	3.35714	0.121273
01.05.02 sugar, glucoside, polyol and carboxylate metabolism	24	5.74	FGSG_01829 FGSG_02059 FGSG_02632 FGSG_04430 FGSG_03905 FGSG_03842 FGSG_03645 FGSG_03624 FGSG_03343 FGSG_12461 FGSG_03003 FGSG_03002 FGSG_04953 FGSG_16511 FGSG_06605 FGSG_07542 FGSG_07551 FGSG_07692 FGSG_09291 FGSG_09821 FGSG_10561 FGSG_11169 FGSG_11048 FGSG_11468	307	2.22	2.58559	2.11062e-05
01.20.01 metabolism of primary metabolic sugar derivatives	2	0.47	FGSG_01809 FGSG_06463	26	0.18	2.61111	0.184899
01.20.01.01 metabolism of secondary monosaccharides	1	0.23	FGSG_06463	4	0.02	11.5	0.115569
01.20.01.09 metabolism of aminoglycoside antibiotics	1	0.23	FGSG_01809	3	0.02	11.5	0.0879904
01.20.05 metabolism of acetic acid derivatives	4	0.95	FGSG_02392 FGSG_15918 FGSG_03354 FGSG_17574	56	0.4	2.375	0.0887413
01.20.05.11 metabolism of polyketides	2	0.47	FGSG_03354 FGSG_17574	26	0.18	2.61111	0.184899
01.20.17 metabolism of secondary products derived from primary amino acids	7	1.67	FGSG_02033 FGSG_02392 FGSG_12390 FGSG_03034 FGSG_16843 FGSG_08409 FGSG_11008	96	0.69	2.42029	0.0262137
01.20.17.01 metabolism of nonprotein amino acids	1	0.23	FGSG_02392	22	0.15	1.53333	0.491305
01.20.17.03 metabolism of amines	4	0.95	FGSG_12390 FGSG_03034 FGSG_16843 FGSG_11008	35	0.25	3.8	0.0205767
01.20.17.09 metabolism of alkaloids	2	0.47	FGSG_02033 FGSG_08409	31	0.22	2.13636	0.240735
01.20.19 metabolism of secondary products derived from glycine, L-serine and L-alanine	1	0.23	FGSG_17446	32	0.23	1	0.626
01.20.19.01 metabolism of porphyrins	1	0.23	FGSG_17446	25	0.18	1.27778	0.536134
01.20.29 metabolism of secondary products derived from L-glutamic acid, L-proline and L-ornithine	1	0.23	FGSG_03936	11	0.07	3.28571	0.286674
01.20.35 metabolism of secondary products derived from L-phenylalanine and L-tyrosine	6	1.43	FGSG_11528 FGSG_03801 FGSG_03589 FGSG_03438 FGSG_13737 FGSG_17446	68	0.49	2.91837	0.0166587
01.20.35.01 metabolism of phenylpropanoids	6	1.43	FGSG_11528 FGSG_03801 FGSG_03589 FGSG_03438 FGSG_13737 FGSG_17446	62	0.44	3.25	0.0108711
20.03.02.02 symporter	10	2.39	FGSG_00116 FGSG_02358 FGSG_02426 FGSG_15788 FGSG_15864 FGSG_15965 FGSG_04610 FGSG_04240 FGSG_03172 FGSG_08014	69	0.49	4.87755	3.95436e-05
01.20.36 non-ribosomal peptide synthesis	2	0.47	FGSG_02251 FGSG_17574	24	0.17	2.76471	0.163124
01.20.37 metabolism of peptide derived compounds	3	0.71	FGSG_00828 FGSG_01603 FGSG_17574	60	0.43	1.65116	0.2722
01.20.37.03 metabolism of peptide antibiotics	1	0.23	FGSG_17574	20	0.14	1.64286	0.459043
01.20.37.05 metabolism of beta-lactams	2	0.47	FGSG_00828 FGSG_01603	19	0.13	3.61538	0.11128
01.25 extracellular metabolism	4	0.95	FGSG_06452 FGSG_11049 FGSG_17446 FGSG_11249	74	0.53	1.79245	0.185221
01.25.01 extracellular polysaccharide degradation	1	0.23	FGSG_06452	33	0.23	1	0.637333
01.25.03 extracellular protein degradation	1	0.23	FGSG_11249	8	0.05	4.6	0.21781
01.25.07 extracellular ester compound degradation	1	0.23	FGSG_11049	16	0.11	2.09091	0.388267
01.25.09 extracellular lignin degradation	1	0.23	FGSG_17446	13	0.09	2.55556	0.329189
02 ENERGY	15	3.58	FGSG_01531 FGSG_01809 FGSG_01829 FGSG_02160 FGSG_02379 FGSG_02392 FGSG_15918 FGSG_04677 FGSG_04214 FGSG_05889 FGSG_16511 FGSG_16878 FGSG_09191 FGSG_10126 FGSG_11295	609	4.4	0.813636	1
02.01 glycolysis and gluconeogenesis	3	0.71	FGSG_01829 FGSG_16878 FGSG_10126	112	0.81	0.876543	1
02.01.03 regulation of glycolysis and gluconeogenesis	1	0.23	FGSG_16878	20	0.14	1.64286	0.459043
02.10 tricarboxylic-acid pathway (citrate cycle, Krebs cycle, TCA cycle)	1	0.23	FGSG_10126	54	0.39	0.589744	1
02.11 electron transport and membrane-associated energy conservation	4	0.95	FGSG_01531 FGSG_02160 FGSG_02379 FGSG_02392	166	1.2	0.791667	1
02.13 respiration	4	0.95	FGSG_01531 FGSG_02160 FGSG_02392 FGSG_05889	186	1.34	0.708955	1
02.13.03 aerobic respiration	1	0.23	FGSG_05889	107	0.77	0.298701	1
02.16 fermentation	8	1.91	FGSG_01531 FGSG_01809 FGSG_02160 FGSG_02392 FGSG_04677 FGSG_04214 FGSG_09191 FGSG_10126	109	0.78	2.44872	0.0174762
02.16.01 alcohol fermentation	3	0.71	FGSG_02160 FGSG_02392 FGSG_04214	56	0.4	1.775	0.239482
02.16.03 lactate fermentation	1	0.23	FGSG_01531	18	0.13	1.76923	0.42474
02.16.13 acetate fermentation	1	0.23	FGSG_10126	3	0.02	11.5	0.0879904
02.19 metabolism of energy reserves (e.g. glycogen, trehalose)	1	0.23	FGSG_16511	52	0.37	0.621622	1
02.25 oxidation of fatty acids	3	0.71	FGSG_02379 FGSG_15918 FGSG_11295	56	0.4	1.775	0.239482
02.45 energy conversion and regeneration	2	0.47	FGSG_02392 FGSG_10126	91	0.65	0.723077	1
10 CELL CYCLE AND DNA PROCESSING	4	0.95	FGSG_02288 FGSG_09728 FGSG_10470 FGSG_17372	1080	7.81	0.121639	1
10.01 DNA processing	3	0.71	FGSG_02288 FGSG_09728 FGSG_17372	595	4.3	0.165116	1
10.01.02 DNA topology	2	0.47	FGSG_02288 FGSG_17372	98	0.7	0.671429	1
10.01.05 DNA recombination and DNA repair	3	0.71	FGSG_02288 FGSG_09728 FGSG_17372	309	2.23	0.318386	1
10.01.05.01 DNA repair	3	0.71	FGSG_02288 FGSG_09728 FGSG_17372	267	1.93	0.367876	1
10.01.05.03 DNA recombination	1	0.23	FGSG_09728	113	0.81	0.283951	1
10.01.05.03.01 meiotic recombination	1	0.23	FGSG_09728	29	0.2	1.15	0.589836
10.01.09 DNA restriction or modification	1	0.23	FGSG_17372	282	2.03	0.1133	1
10.01.09.05 DNA conformation modification (e.g. chromatin)	1	0.23	FGSG_17372	274	1.98	0.116162	1
10.03 cell cycle	2	0.47	FGSG_09728 FGSG_10470	705	5.09	0.0923379	1
10.03.01 mitotic cell cycle and cell cycle control	1	0.23	FGSG_10470	507	3.66	0.0628415	1
10.03.01.01 mitotic cell cycle	1	0.23	FGSG_10470	203	1.46	0.157534	1
10.03.01.01.01 G1 phase of mitotic cell cycle	1	0.23	FGSG_10470	35	0.25	0.92	1
10.03.02 meiosis	1	0.23	FGSG_09728	124	0.89	0.258427	1
11 TRANSCRIPTION	10	2.39	FGSG_02288 FGSG_03783 FGSG_16228 FGSG_07753 FGSG_16669 FGSG_17134 FGSG_09884 FGSG_10470 FGSG_17372 FGSG_17662	1225	8.86	0.269752	1
11.02 RNA synthesis	10	2.39	FGSG_02288 FGSG_03783 FGSG_16228 FGSG_07753 FGSG_16669 FGSG_17134 FGSG_09884 FGSG_10470 FGSG_17372 FGSG_17662	960	6.94	0.34438	1
11.02.02 tRNA synthesis	1	0.23	FGSG_02288	55	0.39	0.589744	1
11.02.03 mRNA synthesis	9	2.15	FGSG_03783 FGSG_16228 FGSG_07753 FGSG_16669 FGSG_17134 FGSG_09884 FGSG_10470 FGSG_17372 FGSG_17662	880	6.36	0.33805	1
11.02.03.04 transcriptional control	9	2.15	FGSG_03783 FGSG_16228 FGSG_07753 FGSG_16669 FGSG_17134 FGSG_09884 FGSG_10470 FGSG_17372 FGSG_17662	765	5.53	0.388788	1
11.02.03.04.01 transcription activation	5	1.19	FGSG_03783 FGSG_16228 FGSG_09884 FGSG_10470 FGSG_17372	189	1.36	0.875	1
11.02.03.04.03 transcription repression	1	0.23	FGSG_17134	111	0.8	0.2875	1
11.04 RNA processing	2	0.47	FGSG_02288 FGSG_16669	442	3.19	0.147335	1
11.04.03 mRNA processing (splicing, 5^-, 3^-end processing)	1	0.23	FGSG_16669	277	2	0.115	1
11.04.03.11 control of mRNA stability	1	0.23	FGSG_16669	29	0.2	1.15	0.589836
12 PROTEIN SYNTHESIS	2	0.47	FGSG_11822 FGSG_02288	439	3.17	0.148265	1
12.04 translation	1	0.23	FGSG_11822	218	1.57	0.146497	1
12.07 translational control	1	0.23	FGSG_02288	84	0.6	0.383333	1
12.10 aminoacyl-tRNA-synthetases	1	0.23	FGSG_11822	46	0.33	0.69697	1
14 PROTEIN FATE (folding, modification, destination)	16	3.82	FGSG_00028 FGSG_03315 FGSG_03154 FGSG_03114 FGSG_05660 FGSG_05889 FGSG_06545 FGSG_07753 FGSG_08022 FGSG_17134 FGSG_10595 FGSG_10712 FGSG_11196 FGSG_10982 FGSG_11411 FGSG_11249	1451	10.4	0.367308	1
14.04 protein targeting, sorting and translocation	1	0.23	FGSG_05660	314	2.27	0.101322	1
14.07 protein modification	11	2.63	FGSG_03315 FGSG_03154 FGSG_06545 FGSG_07753 FGSG_08022 FGSG_10595 FGSG_10712 FGSG_11196 FGSG_10982 FGSG_11411 FGSG_11249	851	6.15	0.427642	1
14.07.04 modification by acetylation, deacetylation	1	0.23	FGSG_11249	82	0.59	0.389831	1
14.07.05 modification by ubiquitination, deubiquitination	1	0.23	FGSG_07753	139	1	0.23	1
14.07.11 protein processing (proteolytic)	5	1.19	FGSG_06545 FGSG_08022 FGSG_11196 FGSG_10982 FGSG_11411	148	1.07	1.11215	0.464888
14.10 assembly of protein complexes	2	0.47	FGSG_05889 FGSG_17134	251	1.81	0.259669	1
14.13 protein/peptide degradation	12	2.87	FGSG_00028 FGSG_03315 FGSG_03114 FGSG_06545 FGSG_07753 FGSG_08022 FGSG_10595 FGSG_10712 FGSG_11196 FGSG_10982 FGSG_11411 FGSG_11249	443	3.2	0.896875	1
14.13.01 cytoplasmic and nuclear protein degradation	7	1.67	FGSG_03315 FGSG_03114 FGSG_06545 FGSG_07753 FGSG_10595 FGSG_10712 FGSG_11411	298	2.15	0.776744	1
14.13.01.01 proteasomal degradation (ubiquitin/proteasomal pathway)	1	0.23	FGSG_07753	173	1.25	0.184	1
20.03.02.02.02 sodium driven symporter	4	0.95	FGSG_02426 FGSG_15864 FGSG_04240 FGSG_03172	12	0.08	11.875	0.000336114
14.13.04.02 vacuolar protein degradation	6	1.43	FGSG_03315 FGSG_06545 FGSG_10595 FGSG_10712 FGSG_10982 FGSG_11411	32	0.23	6.21739	0.000342377
16 PROTEIN WITH BINDING FUNCTION OR COFACTOR REQUIREMENT (structural or catalytic)	53	12.6	FGSG_00203 FGSG_00272 FGSG_11822 FGSG_00783 FGSG_01531 FGSG_01829 FGSG_01993 FGSG_02033 FGSG_02069 FGSG_02160 FGSG_02206 FGSG_02379 FGSG_02392 FGSG_15713 FGSG_11528 FGSG_04603 FGSG_04599 FGSG_04240 FGSG_04214 FGSG_04092 FGSG_03936 FGSG_03801 FGSG_12390 FGSG_03354 FGSG_03247 FGSG_12485 FGSG_03114 FGSG_03034 FGSG_02847 FGSG_16329 FGSG_05660 FGSG_05889 FGSG_05919 FGSG_16511 FGSG_06445 FGSG_06452 FGS…	3139	22.7	0.555066	1
16.01 protein binding	11	2.63	FGSG_00272 FGSG_01829 FGSG_15713 FGSG_04240 FGSG_03354 FGSG_16329 FGSG_07753 FGSG_09142 FGSG_09728 FGSG_17134 FGSG_10982	1601	11.5	0.228696	1
16.03 nucleic acid binding	5	1.19	FGSG_01993 FGSG_07753 FGSG_09728 FGSG_10470 FGSG_17372	811	5.86	0.203072	1
16.03.01 DNA binding	3	0.71	FGSG_09728 FGSG_10470 FGSG_17372	471	3.4	0.208824	1
16.03.03 RNA binding	1	0.23	FGSG_01993	327	2.36	0.0974576	1
01.20 secondary metabolism	35	8.37	FGSG_00828 FGSG_01603 FGSG_01809 FGSG_02033 FGSG_02251 FGSG_02392 FGSG_02615 FGSG_15918 FGSG_11528 FGSG_04302 FGSG_03936 FGSG_03801 FGSG_12390 FGSG_03589 FGSG_03438 FGSG_03354 FGSG_03163 FGSG_03034 FGSG_16309 FGSG_06463 FGSG_07606 FGSG_07765 FGSG_16843 FGSG_08618 FGSG_08409 FGSG_17076 FGSG_13737 FGSG_11038 FGSG_11027 FGSG_11008 FGSG_17446 FGSG_17459 FGSG_11303 FGSG_11295 FGSG_17574	627	4.53	1.84768	0.000354176
16.09 lipid binding	3	0.71	FGSG_02069 FGSG_16329 FGSG_16511	68	0.49	1.44898	0.338663
16.13 C-compound binding	3	0.71	FGSG_02392 FGSG_17134 FGSG_10561	44	0.31	2.29032	0.147199
16.13.01 sugar binding	1	0.23	FGSG_10561	26	0.18	1.27778	0.550184
16.17 metal binding	17	4.06	FGSG_00272 FGSG_02069 FGSG_02206 FGSG_11528 FGSG_04603 FGSG_04214 FGSG_04092 FGSG_03801 FGSG_12485 FGSG_03114 FGSG_16329 FGSG_07375 FGSG_07753 FGSG_10470 FGSG_10982 FGSG_11303 FGSG_11249	758	5.48	0.740876	1
16.17.01 calcium binding	1	0.23	FGSG_16329	99	0.71	0.323944	1
16.17.07 magnesium binding	1	0.23	FGSG_07375	111	0.8	0.2875	1
16.17.09 heavy metal binding (Cu, Fe, Zn)	14	3.34	FGSG_00272 FGSG_02069 FGSG_11528 FGSG_04603 FGSG_04214 FGSG_04092 FGSG_03801 FGSG_12485 FGSG_03114 FGSG_07375 FGSG_07753 FGSG_10470 FGSG_11303 FGSG_11249	499	3.6	0.927778	1
16.19 nucleotide/nucleoside/nucleobase binding	10	2.39	FGSG_00203 FGSG_11822 FGSG_02069 FGSG_03247 FGSG_02847 FGSG_05660 FGSG_05889 FGSG_09728 FGSG_17372 FGSG_11174	868	6.27	0.38118	1
16.19.03 ATP binding	6	1.43	FGSG_03247 FGSG_02847 FGSG_05889 FGSG_09728 FGSG_17372 FGSG_11174	660	4.77	0.29979	1
16.19.05 GTP binding	2	0.47	FGSG_00203 FGSG_05660	132	0.95	0.494737	1
16.21 complex cofactor/cosubstrate/vitamine binding	16	3.82	FGSG_01531 FGSG_02033 FGSG_02160 FGSG_02379 FGSG_02392 FGSG_04599 FGSG_04092 FGSG_03936 FGSG_12390 FGSG_03034 FGSG_05919 FGSG_16843 FGSG_08409 FGSG_11008 FGSG_17459 FGSG_11303	514	3.71	1.02965	0.488852
16.21.01 heme binding	2	0.47	FGSG_04092 FGSG_11303	91	0.65	0.723077	1
16.21.05 FAD/FMN binding	10	2.39	FGSG_01531 FGSG_02033 FGSG_02379 FGSG_12390 FGSG_03034 FGSG_05919 FGSG_16843 FGSG_08409 FGSG_11008 FGSG_17459	151	1.09	2.19266	0.0164444
16.21.07 NAD/NADP binding	8	1.91	FGSG_02160 FGSG_02392 FGSG_04599 FGSG_03936 FGSG_12390 FGSG_03034 FGSG_16843 FGSG_11008	231	1.67	1.14371	0.39876
16.25 oxygen binding	1	0.23	FGSG_04092	8	0.05	4.6	0.21781
18 REGULATION OF METABOLISM AND PROTEIN FUNCTION	2	0.47	FGSG_16329 FGSG_17134	512	3.7	0.127027	1
18.02 regulation of protein activity	2	0.47	FGSG_16329 FGSG_17134	502	3.63	0.129477	1
18.02.01 enzymatic activity regulation / enzyme regulator	2	0.47	FGSG_16329 FGSG_17134	313	2.26	0.207965	1
18.02.01.01 enzyme activator	1	0.23	FGSG_17134	142	1.02	0.22549	1
18.02.01.01.03 protease activator	1	0.23	FGSG_17134	12	0.08	2.875	0.308257
18.02.01.02 enzyme inhibitor	1	0.23	FGSG_16329	58	0.41	0.560976	1
18.02.09 regulator of transcription factor	1	0.23	FGSG_17134	106	0.76	0.302632	1
01.05.02.07 sugar, glucoside, polyol and carboxylate catabolism	17	4.06	FGSG_02632 FGSG_04430 FGSG_03905 FGSG_03842 FGSG_03645 FGSG_03624 FGSG_03003 FGSG_03002 FGSG_04953 FGSG_16511 FGSG_06605 FGSG_07542 FGSG_07551 FGSG_09291 FGSG_09821 FGSG_11048 FGSG_11468	224	1.62	2.50617	0.000470516
34.01.01 homeostasis of cations	20	4.78	FGSG_00539 FGSG_02251 FGSG_02426 FGSG_15788 FGSG_15864 FGSG_04245 FGSG_03987 FGSG_12485 FGSG_03172 FGSG_02970 FGSG_02847 FGSG_16329 FGSG_16634 FGSG_08014 FGSG_08985 FGSG_10470 FGSG_11029 FGSG_17446 FGSG_17574 FGSG_17637	290	2.09	2.28708	0.000534207
01 METABOLISM	132	31.5	FGSG_00116 FGSG_00539 FGSG_00783 FGSG_00828 FGSG_00989 FGSG_01531 FGSG_01603 FGSG_01809 FGSG_01829 FGSG_02033 FGSG_02059 FGSG_02069 FGSG_02160 FGSG_02206 FGSG_02251 FGSG_02288 FGSG_02358 FGSG_02379 FGSG_02392 FGSG_02486 FGSG_02615 FGSG_02632 FGSG_02678 FGSG_15788 FGSG_15918 FGSG_15965 FGSG_11528 FGSG_16066 FGSG_04677 FGSG_04610 FGSG_04603 FGSG_04599 FGSG_04430 FGSG_04302 FGSG_04214 FGSG_04092 FGS…	3402	24.6	1.28049	0.000630698
20.01.01.01 cation transport (H+, Na+, K+, Ca2+ , NH4+, etc.)	13	3.11	FGSG_00539 FGSG_02251 FGSG_15713 FGSG_04245 FGSG_04240 FGSG_03987 FGSG_12485 FGSG_02847 FGSG_16634 FGSG_08985 FGSG_11029 FGSG_17446 FGSG_17637	269	1.94	1.60309	0.0654367
20.01.01.01.01 heavy metal ion transport (Cu+, Fe3+, etc.)	7	1.67	FGSG_00539 FGSG_02251 FGSG_03987 FGSG_12485 FGSG_16634 FGSG_11029 FGSG_17446	99	0.71	2.35211	0.0303527
01.05.11.07.02 anaerobic aromate catabolism	3	0.71	FGSG_04302 FGSG_16309 FGSG_17076	9	0.06	11.8333	0.00201173
20.01.01.07 anion transport	5	1.19	FGSG_02426 FGSG_15864 FGSG_03930 FGSG_03172 FGSG_09191	65	0.47	2.53191	0.046436
20.01.01.07.07 phosphate transport	3	0.71	FGSG_02426 FGSG_15864 FGSG_03172	21	0.15	4.73333	0.0243533
20 CELLULAR TRANSPORT, TRANSPORT FACILITIES AND TRANSPORT ROUTES	82	19.6	FGSG_00067 FGSG_00116 FGSG_00539 FGSG_01484 FGSG_01531 FGSG_01809 FGSG_02070 FGSG_02160 FGSG_02251 FGSG_02358 FGSG_02379 FGSG_02392 FGSG_02426 FGSG_15713 FGSG_15788 FGSG_15864 FGSG_15893 FGSG_15965 FGSG_04658 FGSG_04610 FGSG_04431 FGSG_04245 FGSG_04240 FGSG_04217 FGSG_04092 FGSG_03987 FGSG_03936 FGSG_03930 FGSG_03772 FGSG_12390 FGSG_03646 FGSG_03366 FGSG_03306 FGSG_03272 FGSG_12485 FGSG_03172 FGS…	2007	14.5	1.35172	0.00230554
20.01.03.01 sugar transport	4	0.95	FGSG_02358 FGSG_15965 FGSG_04610 FGSG_10483	54	0.39	2.4359	0.0799874
20.01.03.03 C4-dicarboxylate transport (e.g. malate, succinate, fumarate)	2	0.47	FGSG_03930 FGSG_05882	18	0.13	3.61538	0.101519
20.01.07 amino acid/amino acid derivatives transport	5	1.19	FGSG_00116 FGSG_15893 FGSG_04240 FGSG_05882 FGSG_07810	120	0.86	1.38372	0.297451
20.01.09 peptide transport	3	0.71	FGSG_02839 FGSG_04876 FGSG_07209	22	0.15	4.73333	0.0275813
20.01.11 amine / polyamine transport	4	0.95	FGSG_00116 FGSG_15893 FGSG_04240 FGSG_07529	58	0.41	2.31707	0.0979355
20.01.13 lipid/fatty acid transport	8	1.91	FGSG_00116 FGSG_15788 FGSG_15893 FGSG_02847 FGSG_08014 FGSG_09210 FGSG_11044 FGSG_11305	141	1.01	1.89109	0.0643545
20.01.15 electron transport	16	3.82	FGSG_01531 FGSG_02160 FGSG_02379 FGSG_02392 FGSG_04092 FGSG_03936 FGSG_12390 FGSG_03154 FGSG_03034 FGSG_05919 FGSG_07765 FGSG_16843 FGSG_09351 FGSG_11038 FGSG_11008 FGSG_11303	398	2.87	1.33101	0.151413
01.20.35.01.01 metabolism of melanins	5	1.19	FGSG_11528 FGSG_03801 FGSG_03438 FGSG_13737 FGSG_17446	32	0.23	5.17391	0.00253122
34.01 homeostasis	20	4.78	FGSG_00539 FGSG_02251 FGSG_02426 FGSG_15788 FGSG_15864 FGSG_04245 FGSG_03987 FGSG_12485 FGSG_03172 FGSG_02970 FGSG_02847 FGSG_16329 FGSG_16634 FGSG_08014 FGSG_08985 FGSG_10470 FGSG_11029 FGSG_17446 FGSG_17574 FGSG_17637	336	2.43	1.96708	0.00313439
20.01.26 neurotransmitter transport	3	0.71	FGSG_00116 FGSG_15893 FGSG_04240	46	0.33	2.15152	0.161711
20.01.27 drug/toxin transport	6	1.43	FGSG_00539 FGSG_03772 FGSG_02847 FGSG_16640 FGSG_07529 FGSG_11029	171	1.23	1.1626	0.414409
20.09 transport routes	54	12.9	FGSG_00067 FGSG_00116 FGSG_00539 FGSG_01484 FGSG_02070 FGSG_02358 FGSG_02426 FGSG_15788 FGSG_15864 FGSG_15893 FGSG_15965 FGSG_04658 FGSG_04610 FGSG_04431 FGSG_04245 FGSG_04217 FGSG_03987 FGSG_03930 FGSG_03772 FGSG_03646 FGSG_03306 FGSG_03272 FGSG_12485 FGSG_03172 FGSG_03083 FGSG_02839 FGSG_16329 FGSG_04876 FGSG_05238 FGSG_05720 FGSG_05802 FGSG_16634 FGSG_16640 FGSG_07209 FGSG_07350 FGSG_07529 FGS…	1237	8.94	1.44295	0.00375198
20.03.01 channel / pore class transport	1	0.23	FGSG_01809	51	0.36	0.638889	1
20.03.02.02.01 proton driven symporter	6	1.43	FGSG_00116 FGSG_02358 FGSG_15788 FGSG_15965 FGSG_04610 FGSG_08014	50	0.36	3.97222	0.0038006
20.03.02 carrier (electrochemical potential-driven transport)	11	2.63	FGSG_00116 FGSG_02358 FGSG_02426 FGSG_15788 FGSG_15864 FGSG_15965 FGSG_04610 FGSG_04240 FGSG_03930 FGSG_03172 FGSG_08014	142	1.02	2.57843	0.00389347
14.13.04 lysosomal and vacuolar protein degradation	6	1.43	FGSG_03315 FGSG_06545 FGSG_10595 FGSG_10712 FGSG_10982 FGSG_11411	51	0.36	3.97222	0.00419994
01.01.09.01.01 biosynthesis of glycine	5	1.19	FGSG_12390 FGSG_03154 FGSG_03034 FGSG_16843 FGSG_11008	36	0.26	4.57692	0.00429303
20.03.02.03 antiporter	1	0.23	FGSG_03930	75	0.54	0.425926	1
20.03.22 transport ATPases	6	1.43	FGSG_04245 FGSG_02847 FGSG_05889 FGSG_08985 FGSG_09210 FGSG_17637	123	0.88	1.625	0.168879
20.03.25 ABC transporters	3	0.71	FGSG_03772 FGSG_02847 FGSG_16640	106	0.76	0.934211	1
16.05 polysaccharide binding	5	1.19	FGSG_00783 FGSG_06445 FGSG_06452 FGSG_10411 FGSG_10561	38	0.27	4.40741	0.00544117
20.09.01 nuclear transport	1	0.23	FGSG_17134	83	0.6	0.383333	1
20.09.04 mitochondrial transport	1	0.23	FGSG_03930	118	0.85	0.270588	1
20.09.07 vesicular transport (Golgi network, etc.)	2	0.47	FGSG_11044 FGSG_11305	267	1.93	0.243523	1
20.09.13 vacuolar/lysosomal transport	1	0.23	FGSG_11044	170	1.22	0.188525	1
20.09.16 cellular export and secretion	8	1.91	FGSG_15788 FGSG_03772 FGSG_16329 FGSG_04876 FGSG_16640 FGSG_07529 FGSG_08014 FGSG_17134	268	1.93	0.989637	1
20.01.23 allantoin and allantoate transport	7	1.67	FGSG_02070 FGSG_04658 FGSG_04431 FGSG_04217 FGSG_03646 FGSG_05238 FGSG_05802	75	0.54	3.09259	0.00744587
20.01.01.01.01.01 siderophore-iron transport	5	1.19	FGSG_00539 FGSG_02251 FGSG_12485 FGSG_11029 FGSG_17446	41	0.29	4.10345	0.00754621
20.09.18.09 vesicular cellular import	1	0.23	FGSG_16329	125	0.9	0.255556	1
20.09.18.09.01 endocytosis	1	0.23	FGSG_16329	125	0.9	0.255556	1
30 CELLULAR COMMUNICATION/SIGNAL TRANSDUCTION MECHANISM	7	1.67	FGSG_00203 FGSG_00272 FGSG_01861 FGSG_16024 FGSG_07606 FGSG_17134 FGSG_10470	652	4.71	0.354565	1
30.01 cellular signalling	6	1.43	FGSG_00203 FGSG_00272 FGSG_16024 FGSG_07606 FGSG_17134 FGSG_10470	560	4.05	0.353086	1
30.01.09 second messenger mediated signal transduction	1	0.23	FGSG_10470	99	0.71	0.323944	1
30.01.09.03 Ca2+ mediated signal transduction	1	0.23	FGSG_10470	34	0.24	0.958333	1
30.05 transmembrane signal transduction	1	0.23	FGSG_01861	191	1.38	0.166667	1
30.05.02 non-enzymatic receptor mediated signalling	1	0.23	FGSG_01861	86	0.62	0.370968	1
30.05.02.24 G-protein coupled receptor signalling pathway	1	0.23	FGSG_01861	38	0.27	0.851852	1
32 CELL RESCUE, DEFENSE AND VIRULENCE	44	10.5	FGSG_00539 FGSG_01603 FGSG_02160 FGSG_02392 FGSG_02615 FGSG_16024 FGSG_04599 FGSG_04430 FGSG_04092 FGSG_03936 FGSG_03772 FGSG_03624 FGSG_03366 FGSG_03354 FGSG_03315 FGSG_03163 FGSG_02847 FGSG_05660 FGSG_16511 FGSG_16640 FGSG_07010 FGSG_07375 FGSG_07529 FGSG_07765 FGSG_16669 FGSG_17076 FGSG_09291 FGSG_09351 FGSG_09370 FGSG_09728 FGSG_17134 FGSG_10470 FGSG_10561 FGSG_10595 FGSG_10712 FGSG_11196 FGS…	1452	10.5	1	0.517726
32.01 stress response	14	3.34	FGSG_02392 FGSG_03936 FGSG_03366 FGSG_03354 FGSG_03315 FGSG_02847 FGSG_16511 FGSG_07010 FGSG_07375 FGSG_09728 FGSG_10470 FGSG_10595 FGSG_10712 FGSG_17637	697	5.04	0.662698	1
32.01.01 oxidative stress response	2	0.47	FGSG_03936 FGSG_02847	122	0.88	0.534091	1
32.01.04 pH stress response	1	0.23	FGSG_17637	10	0.07	3.28571	0.264419
32.01.07 unfolded protein response (e.g. ER quality control)	1	0.23	FGSG_03354	80	0.57	0.403509	1
32.01.09 DNA damage response	1	0.23	FGSG_09728	145	1.04	0.221154	1
32.01.11 nutrient starvation response	5	1.19	FGSG_03366 FGSG_03315 FGSG_07375 FGSG_10595 FGSG_10712	52	0.37	3.21622	0.0200035
32.05 disease, virulence and defense	22	5.26	FGSG_01603 FGSG_02160 FGSG_02392 FGSG_02615 FGSG_16024 FGSG_04599 FGSG_03772 FGSG_02847 FGSG_05660 FGSG_16640 FGSG_07529 FGSG_16669 FGSG_17076 FGSG_09351 FGSG_09370 FGSG_17134 FGSG_10561 FGSG_11195 FGSG_11049 FGSG_11038 FGSG_17446 FGSG_17574	507	3.66	1.43716	0.0571325
32.05.01 resistance proteins	7	1.67	FGSG_03772 FGSG_02847 FGSG_05660 FGSG_16640 FGSG_07529 FGSG_17076 FGSG_17446	172	1.24	1.34677	0.264928
32.05.01.03 chemical agent resistance	4	0.95	FGSG_03772 FGSG_02847 FGSG_16640 FGSG_17446	63	0.45	2.11111	0.122742
32.05.01.03.03 inorganic chemical agent resistance (e.g. heavy metals)	1	0.23	FGSG_17446	15	0.1	2.3	0.369175
32.05.03 defense related proteins	7	1.67	FGSG_01603 FGSG_02160 FGSG_02392 FGSG_05660 FGSG_09351 FGSG_11195 FGSG_17574	92	0.66	2.5303	0.021319
32.05.05 virulence, disease factors	7	1.67	FGSG_02615 FGSG_16024 FGSG_04599 FGSG_09370 FGSG_10561 FGSG_11049 FGSG_11038	222	1.6	1.04375	0.509065
32.05.05.01 toxins	3	0.71	FGSG_02615 FGSG_10561 FGSG_11038	62	0.44	1.61364	0.288742
32.07 detoxification	18	4.3	FGSG_00539 FGSG_01603 FGSG_02160 FGSG_02392 FGSG_04092 FGSG_03772 FGSG_03163 FGSG_02847 FGSG_16640 FGSG_07529 FGSG_07765 FGSG_17076 FGSG_09351 FGSG_11196 FGSG_11195 FGSG_11038 FGSG_11029 FGSG_11303	520	3.76	1.14362	0.310686
32.07.01 detoxification involving cytochrome P450	5	1.19	FGSG_04092 FGSG_07765 FGSG_09351 FGSG_11038 FGSG_11303	111	0.8	1.4875	0.245286
32.07.03 detoxification by modification	2	0.47	FGSG_02392 FGSG_17076	60	0.43	1.09302	0.545516
32.07.05 detoxification by export	4	0.95	FGSG_03772 FGSG_02847 FGSG_16640 FGSG_07529	139	1	0.95	1
32.07.07 oxygen and radical detoxification	1	0.23	FGSG_11196	68	0.49	0.469388	1
32.07.07.07 superoxide metabolism	1	0.23	FGSG_11196	14	0.1	2.3	0.349488
32.07.09 detoxification by degradation	2	0.47	FGSG_01603 FGSG_02160	38	0.27	1.74074	0.319686
32.10 degradation / modification of foreign (exogenous) compounds	5	1.19	FGSG_01603 FGSG_04430 FGSG_03624 FGSG_09291 FGSG_11303	77	0.55	2.16364	0.0834119
32.10.07 degradation / modification of foreign (exogenous) polysaccharides	3	0.71	FGSG_04430 FGSG_03624 FGSG_09291	31	0.22	3.22727	0.0660781
32.10.09 degradation / modification of foreign (exogenous) ester compounds	1	0.23	FGSG_01603	23	0.16	1.4375	0.506709
34 INTERACTION WITH THE ENVIRONMENT	29	6.93	FGSG_00539 FGSG_01831 FGSG_02251 FGSG_02426 FGSG_15713 FGSG_15788 FGSG_15864 FGSG_04245 FGSG_04240 FGSG_03987 FGSG_12390 FGSG_12485 FGSG_03172 FGSG_03034 FGSG_02970 FGSG_02847 FGSG_16329 FGSG_16634 FGSG_07810 FGSG_16843 FGSG_08014 FGSG_08985 FGSG_17134 FGSG_10470 FGSG_10561 FGSG_11029 FGSG_17446 FGSG_17574 FGSG_17637	832	6.01	1.15308	0.237697
20.01.01 ion transport	18	4.3	FGSG_00539 FGSG_02251 FGSG_02426 FGSG_15713 FGSG_15864 FGSG_04245 FGSG_04240 FGSG_03987 FGSG_03930 FGSG_12485 FGSG_03172 FGSG_02847 FGSG_16634 FGSG_08985 FGSG_09191 FGSG_11029 FGSG_17446 FGSG_17637	321	2.32	1.85345	0.00896801
20.01.25 vitamine/cofactor transport	8	1.91	FGSG_02070 FGSG_04658 FGSG_04431 FGSG_04217 FGSG_03646 FGSG_03366 FGSG_05238 FGSG_05802	97	0.7	2.72857	0.00906148
34.01.01.01 homeostasis of metal ions (Na, K, Ca etc.)	13	3.11	FGSG_00539 FGSG_02251 FGSG_04245 FGSG_03987 FGSG_12485 FGSG_02847 FGSG_16329 FGSG_16634 FGSG_08985 FGSG_11029 FGSG_17446 FGSG_17574 FGSG_17637	208	1.5	2.07333	0.0107255
34.01.01.03 homeostasis of protons	3	0.71	FGSG_15788 FGSG_02970 FGSG_08014	67	0.48	1.47917	0.330336
34.01.03 homeostasis of anions	4	0.95	FGSG_02426 FGSG_15864 FGSG_03172 FGSG_02970	36	0.26	3.65385	0.0226122
34.01.03.03 homeostasis of phosphate	3	0.71	FGSG_02426 FGSG_15864 FGSG_03172	15	0.1	7.1	0.00952198
34.03 membrane excitability	1	0.23	FGSG_04240	39	0.28	0.821429	1
34.03.01 synaptic transmission	1	0.23	FGSG_04240	36	0.26	0.884615	1
34.05 cell motility	1	0.23	FGSG_15713	138	0.99	0.232323	1
34.05.01 cell migration	1	0.23	FGSG_15713	84	0.6	0.383333	1
34.11 cellular sensing and response to external stimulus	7	1.67	FGSG_01831 FGSG_12390 FGSG_03034 FGSG_07810 FGSG_16843 FGSG_17134 FGSG_10561	350	2.53	0.660079	1
34.11.03 chemoperception and response	4	0.95	FGSG_12390 FGSG_03034 FGSG_16843 FGSG_10561	165	1.19	0.798319	1
34.11.03.11 pH response	1	0.23	FGSG_10561	20	0.14	1.64286	0.459043
34.11.03.13 osmosensing and response	3	0.71	FGSG_12390 FGSG_03034 FGSG_16843	79	0.57	1.24561	0.429084
34.11.10 response to biotic stimulus	2	0.47	FGSG_17134 FGSG_10561	17	0.12	3.91667	0.0920135
34.11.12 perception of nutrients and nutritional adaptation	2	0.47	FGSG_07810 FGSG_10561	88	0.63	0.746032	1
36 SYSTEMIC INTERACTION WITH THE ENVIRONMENT	1	0.23	FGSG_07606	18	0.13	1.76923	0.42474
36.20 plant / fungal specific systemic sensing and response	1	0.23	FGSG_07606	18	0.13	1.76923	0.42474
36.20.18 plant hormonal regulation	1	0.23	FGSG_07606	18	0.13	1.76923	0.42474
40 CELL FATE	8	1.91	FGSG_15713 FGSG_04584 FGSG_16329 FGSG_07606 FGSG_09142 FGSG_09728 FGSG_17134 FGSG_10470	548	3.96	0.482323	1
40.01 cell growth / morphogenesis	4	0.95	FGSG_15713 FGSG_04584 FGSG_09142 FGSG_10470	383	2.77	0.34296	1
40.01.03 directional cell growth (morphogenesis)	3	0.71	FGSG_15713 FGSG_04584 FGSG_09142	141	1.01	0.70297	1
40.01.03.03 guidance of longitudinal cell extension (e.g. pollen tube guidance, axonal pathfinding)	2	0.47	FGSG_15713 FGSG_09142	65	0.47	1	0.589172
40.10 cell death	3	0.71	FGSG_16329 FGSG_09728 FGSG_17134	163	1.17	0.606838	1
40.10.02 apoptosis (type I programmed cell death)	3	0.71	FGSG_16329 FGSG_09728 FGSG_17134	150	1.08	0.657407	1
40.10.02.01 anti-apoptosis	1	0.23	FGSG_16329	31	0.22	1.04545	0.614313
40.10.02.02 apoptotic program	1	0.23	FGSG_17134	27	0.19	1.21053	0.563809
40.10.02.02.02 caspase activation	1	0.23	FGSG_17134	11	0.07	3.28571	0.286674
40.10.02.03 induction of apoptosis	2	0.47	FGSG_09728 FGSG_17134	32	0.23	2.04348	0.252027
40.10.02.03.02 induction of apoptosis by intracellular signals	1	0.23	FGSG_09728	10	0.07	3.28571	0.264419
40.20 cell aging	1	0.23	FGSG_07606	35	0.25	0.92	1
41 DEVELOPMENT (Systemic)	4	0.95	FGSG_00203 FGSG_00989 FGSG_07543 FGSG_09478	98	0.7	1.35714	0.344238
41.01 fungal/microorganismic development	4	0.95	FGSG_00203 FGSG_00989 FGSG_07543 FGSG_09478	98	0.7	1.35714	0.344238
41.01.01 mating (fertilization)	1	0.23	FGSG_09478	42	0.3	0.766667	1
42 BIOGENESIS OF CELLULAR COMPONENTS	21	5.02	FGSG_01531 FGSG_02059 FGSG_02160 FGSG_02288 FGSG_02392 FGSG_15713 FGSG_04584 FGSG_04430 FGSG_03936 FGSG_03930 FGSG_03343 FGSG_03154 FGSG_05660 FGSG_05889 FGSG_07551 FGSG_09291 FGSG_10126 FGSG_17372 FGSG_11169 FGSG_11305 FGSG_11249	1165	8.42	0.5962	1
42.01 cell wall	10	2.39	FGSG_02059 FGSG_02288 FGSG_04584 FGSG_04430 FGSG_03343 FGSG_07551 FGSG_09291 FGSG_10126 FGSG_11169 FGSG_11305	276	1.99	1.20101	0.324682
42.04 cytoskeleton/structural proteins	1	0.23	FGSG_15713	303	2.19	0.105023	1
42.10 nucleus	2	0.47	FGSG_17372 FGSG_11249	300	2.16	0.217593	1
42.10.03 organization of chromosome structure	2	0.47	FGSG_17372 FGSG_11249	260	1.88	0.25	1
42.16 mitochondrion	6	1.43	FGSG_01531 FGSG_02160 FGSG_02392 FGSG_03936 FGSG_03930 FGSG_05889	180	1.3	1.1	0.462737
42.19 peroxisome	1	0.23	FGSG_03154	34	0.24	0.958333	1
42.25 vacuole or lysosome	1	0.23	FGSG_05660	57	0.41	0.560976	1
43 CELL TYPE DIFFERENTIATION	12	2.87	FGSG_00203 FGSG_16024 FGSG_04584 FGSG_03366 FGSG_03315 FGSG_16878 FGSG_08021 FGSG_17077 FGSG_09353 FGSG_10595 FGSG_10712 FGSG_11305	649	4.69	0.61194	1
43.01 fungal/microorganismic cell type differentiation	12	2.87	FGSG_00203 FGSG_16024 FGSG_04584 FGSG_03366 FGSG_03315 FGSG_16878 FGSG_08021 FGSG_17077 FGSG_09353 FGSG_10595 FGSG_10712 FGSG_11305	649	4.69	0.61194	1
43.01.03 fungal and other eukaryotic cell type differentiation	12	2.87	FGSG_00203 FGSG_16024 FGSG_04584 FGSG_03366 FGSG_03315 FGSG_16878 FGSG_08021 FGSG_17077 FGSG_09353 FGSG_10595 FGSG_10712 FGSG_11305	649	4.69	0.61194	1
43.01.03.05 budding, cell polarity and filament formation	3	0.71	FGSG_00203 FGSG_04584 FGSG_03366	293	2.11	0.336493	1
43.01.03.06 hyphae formation	2	0.47	FGSG_08021 FGSG_09353	23	0.16	2.9375	0.152421
43.01.03.09 development of asco- basidio- or zygospore	6	1.43	FGSG_03315 FGSG_16878 FGSG_17077 FGSG_10595 FGSG_10712 FGSG_11305	196	1.41	1.01418	0.545674
99 UNCLASSIFIED PROTEINS	211	50.4	FGSG_11648 FGSG_11651 FGSG_00060 FGSG_00061 FGSG_00062 FGSG_00068 FGSG_00165 FGSG_00199 FGSG_11738 FGSG_00312 FGSG_00453 FGSG_00487 FGSG_00540 FGSG_00876 FGSG_00885 FGSG_11850 FGSG_11864 FGSG_01060 FGSG_01139 FGSG_01205 FGSG_15119 FGSG_01261 FGSG_01379 FGSG_15128 FGSG_01532 FGSG_01579 FGSG_01590 FGSG_01607 FGSG_12001 FGSG_01800 FGSG_02076 FGSG_02131 FGSG_02169 FGSG_12081 FGSG_12086 FGSG_02249 FGS…	7238	52.3	0.963671	0.796205

## Sheet: Patho_Axo_734 genes
FUNCTIONAL CATEGORY	abs SET	rel SET	genes SET	abs GENOME	rel GENOME	rel SET/rel GENOME	P-VALUE
01 METABOLISM	236	32.1	FGSG_00011 FGSG_00046 FGSG_00048 FGSG_00049 FGSG_00050 FGSG_00053 FGSG_00109 FGSG_00139 FGSG_00172 FGSG_00194 FGSG_11721 FGSG_00287 FGSG_00361 FGSG_00404 FGSG_00423 FGSG_00427 FGSG_00578 FGSG_00685 FGSG_11814 FGSG_00774 FGSG_00844 FGSG_00960 FGSG_01312 FGSG_01389 FGSG_01621 FGSG_01640 FGSG_01711 FGSG_01730 FGSG_01785 FGSG_01819 FGSG_01836 FGSG_01929 FGSG_02146 FGSG_02165 FGSG_02168 FGSG_02203 FGS…	3402	24.6	1.30488	1.26201e-06
01.01 amino acid metabolism	45	6.13	FGSG_00011 FGSG_00049 FGSG_00053 FGSG_00109 FGSG_11721 FGSG_00685 FGSG_00774 FGSG_01389 FGSG_01730 FGSG_02168 FGSG_02203 FGSG_15680 FGSG_15697 FGSG_15784 FGSG_16047 FGSG_04024 FGSG_04022 FGSG_03880 FGSG_03414 FGSG_03181 FGSG_16339 FGSG_16351 FGSG_04708 FGSG_04828 FGSG_04902 FGSG_05704 FGSG_06997 FGSG_07023 FGSG_07410 FGSG_13176 FGSG_16847 FGSG_08596 FGSG_09141 FGSG_10043 FGSG_10194 FGSG_10534 FGS…	649	4.69	1.30704	0.0396798
01.01.03 assimilation of ammonia, metabolism of the glutamate group	10	1.36	FGSG_11721 FGSG_00685 FGSG_01389 FGSG_15697 FGSG_16339 FGSG_04902 FGSG_07023 FGSG_10043 FGSG_10194 FGSG_11462	127	0.91	1.49451	0.137536
01.01.03.01 metabolism of glutamine	1	0.13	FGSG_10043	16	0.11	1.18182	0.58242
01.01.03.01.01 biosynthesis of glutamine	1	0.13	FGSG_10043	5	0.03	4.33333	0.238746
01.01.03.02 metabolism of glutamate	5	0.68	FGSG_01389 FGSG_04902 FGSG_07023 FGSG_10043 FGSG_10194	63	0.45	1.51111	0.241881
01.01.03.02.01 biosynthesis of glutamate	3	0.4	FGSG_01389 FGSG_04902 FGSG_10043	41	0.29	1.37931	0.372313
01.01.03.02.02 degradation of glutamate	1	0.13	FGSG_07023	21	0.15	0.866667	1
01.01.03.03 metabolism of proline	3	0.4	FGSG_15697 FGSG_16339 FGSG_11462	26	0.18	2.22222	0.157424
01.01.03.03.02 degradation of proline	3	0.4	FGSG_15697 FGSG_16339 FGSG_11462	18	0.13	3.07692	0.0670886
01.01.03.05 metabolism of arginine	2	0.27	FGSG_11721 FGSG_01389	48	0.34	0.794118	1
01.01.03.05.01 biosynthesis of arginine	1	0.13	FGSG_01389	27	0.19	0.684211	1
01.01.03.05.02 degradation of arginine	1	0.13	FGSG_11721	14	0.1	1.3	0.53423
01.01.05 metabolism of urea cycle, creatine and polyamines	1	0.13	FGSG_11721	45	0.32	0.40625	1
01.01.05.03 metabolism of urea (urea cycle)	1	0.13	FGSG_11721	27	0.19	0.684211	1
01.01.06 metabolism of the aspartate family	8	1.08	FGSG_00049 FGSG_01389 FGSG_01730 FGSG_07410 FGSG_10617 FGSG_10659 FGSG_13829 FGSG_17505	137	0.99	1.09091	0.443159
01.01.06.01 metabolism of aspartate	4	0.54	FGSG_01389 FGSG_01730 FGSG_07410 FGSG_10659	25	0.18	3	0.040984
01.01.06.01.01 biosynthesis of aspartate	2	0.27	FGSG_07410 FGSG_10659	13	0.09	3	0.149237
01.01.06.01.02 degradation of aspartate	2	0.27	FGSG_01389 FGSG_01730	15	0.1	2.7	0.187701
01.01.06.02 metabolism of asparagine	2	0.27	FGSG_07410 FGSG_10659	13	0.09	3	0.149237
01.01.06.02.02 degradation of asparagine	2	0.27	FGSG_07410 FGSG_10659	5	0.03	9	0.0252831
01.01.06.05 metabolism of methionine	2	0.27	FGSG_00049 FGSG_13829	44	0.31	0.870968	1
01.01.06.05.02 degradation of methionine	1	0.13	FGSG_00049	7	0.05	2.6	0.317458
01.01.06.06 metabolism of lysine	1	0.13	FGSG_10617	55	0.39	0.333333	1
01.01.06.06.01 biosynthesis of lysine	1	0.13	FGSG_10617	32	0.23	0.565217	1
01.01.06.06.01.03 aminoadipic acid pathway	1	0.13	FGSG_10617	14	0.1	1.3	0.53423
01.01.09 metabolism of the cysteine - aromatic group	19	2.58	FGSG_00053 FGSG_01389 FGSG_02168 FGSG_02203 FGSG_15680 FGSG_16047 FGSG_04024 FGSG_03880 FGSG_03414 FGSG_03181 FGSG_04708 FGSG_04828 FGSG_05704 FGSG_07023 FGSG_13176 FGSG_10194 FGSG_10534 FGSG_13829 FGSG_11420	266	1.92	1.34375	0.115956
01.01.09.01 metabolism of glycine	2	0.27	FGSG_03414 FGSG_04708	48	0.34	0.794118	1
01.01.09.01.02 degradation of glycine	1	0.13	FGSG_03414	17	0.12	1.08333	0.604614
01.01.09.02 metabolism of serine	3	0.4	FGSG_02203 FGSG_04024 FGSG_03414	48	0.34	1.17647	0.472517
01.01.09.02.01 biosynthesis of serine	2	0.27	FGSG_02203 FGSG_04024	26	0.18	1.5	0.405035
01.01.09.02.02 degradation of serine	1	0.13	FGSG_03414	12	0.08	1.625	0.480486
01.01.09.03 metabolism of cysteine	3	0.4	FGSG_03181 FGSG_07023 FGSG_13829	30	0.21	1.90476	0.211628
01.01.09.03.02 degradation of cysteine	3	0.4	FGSG_03181 FGSG_07023 FGSG_13829	12	0.08	5	0.0228735
01.01.09.04 metabolism of phenylalanine	7	0.95	FGSG_00053 FGSG_01389 FGSG_15680 FGSG_03880 FGSG_03181 FGSG_05704 FGSG_13176	94	0.67	1.41791	0.231752
01.01.09.04.01 biosynthesis of phenylalanine	5	0.68	FGSG_01389 FGSG_15680 FGSG_03880 FGSG_03181 FGSG_13176	61	0.44	1.54545	0.222092
01.01.09.04.02 degradation of phenylalanine	3	0.4	FGSG_15680 FGSG_03181 FGSG_13176	64	0.46	0.869565	1
01.01.09.05 metabolism of tyrosine	7	0.95	FGSG_00053 FGSG_01389 FGSG_16047 FGSG_03880 FGSG_03181 FGSG_05704 FGSG_11420	64	0.46	2.06522	0.0522177
01.01.09.05.01 biosynthesis of tyrosine	3	0.4	FGSG_01389 FGSG_03880 FGSG_03181	12	0.08	5	0.0228735
01.01.09.05.02 degradation of tyrosine	3	0.4	FGSG_16047 FGSG_03181 FGSG_11420	33	0.23	1.73913	0.254541
01.01.09.06 metabolism of tryptophan	5	0.68	FGSG_01389 FGSG_03880 FGSG_03181 FGSG_04828 FGSG_05704	47	0.33	2.06061	0.102286
01.01.09.06.01 biosynthesis of tryptophan	3	0.4	FGSG_01389 FGSG_03880 FGSG_03181	20	0.14	2.85714	0.0867585
01.01.09.06.02 degradation of tryptophan	2	0.27	FGSG_03181 FGSG_04828	14	0.1	2.7	0.16828
01.01.09.07 metabolism of histidine	3	0.4	FGSG_03181 FGSG_07023 FGSG_10194	24	0.17	2.35294	0.132185
01.01.09.07.01 biosynthesis of histidine	3	0.4	FGSG_03181 FGSG_07023 FGSG_10194	19	0.13	3.07692	0.0766442
01.01.11 metabolism of the pyruvate family (alanine, isoleucine, leucine, valine) and D-alanine	6	0.81	FGSG_00049 FGSG_00109 FGSG_01730 FGSG_15784 FGSG_04708 FGSG_11457	65	0.47	1.7234	0.129915
01.01.11.01 metabolism of alanine	2	0.27	FGSG_00109 FGSG_04708	8	0.05	5.4	0.0636847
01.01.11.01.01 biosynthesis of alanine	1	0.13	FGSG_00109	2	0.01	13	0.103362
01.01.11.01.02 degradation of alanine	1	0.13	FGSG_00109	2	0.01	13	0.103362
01.01.11.02 metabolism of isoleucine	2	0.27	FGSG_00049 FGSG_11457	25	0.18	1.5	0.385988
01.01.11.02.01 biosynthesis of isoleucine	2	0.27	FGSG_00049 FGSG_11457	17	0.12	2.25	0.227311
01.01.11.02.02 degradation of isoleucine	1	0.13	FGSG_00049	10	0.07	1.85714	0.420551
01.01.11.03 metabolism of valine	1	0.13	FGSG_00049	21	0.15	0.866667	1
01.01.11.03.01 biosynthesis of valine	1	0.13	FGSG_00049	13	0.09	1.44444	0.50809
01.01.11.03.02 degradation of valine	1	0.13	FGSG_00049	11	0.07	1.85714	0.451335
01.01.11.04 metabolism of leucine	1	0.13	FGSG_00049	31	0.22	0.590909	1
01.01.11.04.01 biosynthesis of leucine	1	0.13	FGSG_00049	21	0.15	0.866667	1
01.01.11.04.02 degradation of leucine	1	0.13	FGSG_00049	19	0.13	1	1
01.01.11.06 metabolism of the D-alanine amino acid group	2	0.27	FGSG_00109 FGSG_01730	6	0.04	6.75	0.0366041
01.01.13 regulation of amino acid metabolism	6	0.81	FGSG_00011 FGSG_00774 FGSG_15697 FGSG_16339 FGSG_10914 FGSG_11462	68	0.49	1.65306	0.15144
01.02 nitrogen, sulfur and selenium metabolism	27	3.67	FGSG_00774 FGSG_01389 FGSG_02279 FGSG_15680 FGSG_03856 FGSG_03414 FGSG_04708 FGSG_05184 FGSG_05859 FGSG_06528 FGSG_07227 FGSG_07410 FGSG_07590 FGSG_13176 FGSG_07837 FGSG_16663 FGSG_09140 FGSG_09348 FGSG_09557 FGSG_09695 FGSG_10043 FGSG_10318 FGSG_10659 FGSG_10993 FGSG_10914 FGSG_10889 FGSG_17505	336	2.43	1.51029	0.021018
01.02.02 nitrogen metabolism	5	0.68	FGSG_02279 FGSG_03414 FGSG_04708 FGSG_05184 FGSG_06528	63	0.45	1.51111	0.241881
01.02.02.09 catabolism of nitrogenous compounds	2	0.27	FGSG_03414 FGSG_06528	28	0.2	1.35	0.44224
01.02.07 regulation of nitrogen, sulfur and selenium metabolism	4	0.54	FGSG_00774 FGSG_16663 FGSG_10914 FGSG_10889	87	0.62	0.870968	1
01.02.07.01 regulation of nitrogen metabolism	1	0.13	FGSG_16663	37	0.26	0.5	1
01.03 nucleotide/nucleoside/nucleobase metabolism	21	2.86	FGSG_00361 FGSG_11814 FGSG_15710 FGSG_04386 FGSG_04151 FGSG_03477 FGSG_05591 FGSG_12890 FGSG_06867 FGSG_08889 FGSG_08650 FGSG_13426 FGSG_09065 FGSG_09259 FGSG_09509 FGSG_10307 FGSG_10538 FGSG_10914 FGSG_10889 FGSG_11457 FGSG_11439	407	2.94	0.972789	1
01.03.01 purin nucleotide/nucleoside/nucleobase metabolism	3	0.4	FGSG_12890 FGSG_10538 FGSG_11457	149	1.07	0.373832	1
01.03.04 pyrimidine nucleotide/nucleoside/nucleobase metabolism	3	0.4	FGSG_15710 FGSG_09065 FGSG_11439	81	0.58	0.689655	1
01.03.04.01 pyrimidine nucleotide/nucleoside/nucleobase catabolism	1	0.13	FGSG_15710	9	0.06	2.16667	0.388042
01.03.04.03 pyrimidine nucleotide/nucleoside/nucleobase anabolism	1	0.13	FGSG_09065	27	0.19	0.684211	1
01.03.07 deoxyribonucleotide metabolism	1	0.13	FGSG_08889	24	0.17	0.764706	1
01.03.13 regulation of nucleotide/nucleoside/nucleobase metabolism	5	0.68	FGSG_03477 FGSG_13426 FGSG_09065 FGSG_10914 FGSG_10889	30	0.21	3.2381	0.0196455
01.03.16 polynucleotide degradation	9	1.22	FGSG_00361 FGSG_11814 FGSG_04386 FGSG_06867 FGSG_08889 FGSG_08650 FGSG_09259 FGSG_09509 FGSG_10307	119	0.86	1.4186	0.181067
01.03.16.01 RNA degradation	2	0.27	FGSG_08650 FGSG_10307	69	0.49	0.55102	1
01.03.16.03 DNA degradation	2	0.27	FGSG_08889 FGSG_09259	18	0.13	2.07692	0.247339
01.04 phosphate metabolism	29	3.95	FGSG_00046 FGSG_11814 FGSG_00844 FGSG_01312 FGSG_01929 FGSG_02459 FGSG_02540 FGSG_11614 FGSG_04580 FGSG_04504 FGSG_04151 FGSG_03880 FGSG_03014 FGSG_16175 FGSG_16401 FGSG_05013 FGSG_12704 FGSG_05591 FGSG_05704 FGSG_06327 FGSG_16572 FGSG_07258 FGSG_07783 FGSG_07894 FGSG_08650 FGSG_09706 FGSG_09772 FGSG_17260 FGSG_11272	601	4.34	0.910138	1
20.01 transported compounds (substrates)	122	16.6	FGSG_00046 FGSG_00139 FGSG_00140 FGSG_00197 FGSG_00219 FGSG_00226 FGSG_00287 FGSG_00334 FGSG_11755 FGSG_01712 FGSG_01730 FGSG_01785 FGSG_02218 FGSG_02278 FGSG_02279 FGSG_02281 FGSG_02343 FGSG_02641 FGSG_02672 FGSG_15680 FGSG_15955 FGSG_04580 FGSG_04512 FGSG_04178 FGSG_04057 FGSG_03984 FGSG_12341 FGSG_03934 FGSG_12358 FGSG_03834 FGSG_03751 FGSG_03744 FGSG_03710 FGSG_03692 FGSG_12415 FGSG_03542 FGS…	1597	11.5	1.44348	1.64906e-05
01.05.02 sugar, glucoside, polyol and carboxylate metabolism	13	1.77	FGSG_00578 FGSG_01640 FGSG_02751 FGSG_15784 FGSG_03922 FGSG_03288 FGSG_03014 FGSG_13196 FGSG_07891 FGSG_07944 FGSG_08131 FGSG_09255 FGSG_11193	307	2.22	0.797297	1
01.05.02.04 sugar, glucoside, polyol and carboxylate anabolism	3	0.4	FGSG_01640 FGSG_03014 FGSG_07891	85	0.61	0.655738	1
01.05.02.07 sugar, glucoside, polyol and carboxylate catabolism	9	1.22	FGSG_00578 FGSG_02751 FGSG_15784 FGSG_03288 FGSG_03014 FGSG_13196 FGSG_07944 FGSG_08131 FGSG_11193	224	1.62	0.753086	1
01.05.03 polysaccharide metabolism	10	1.36	FGSG_01640 FGSG_03922 FGSG_03288 FGSG_03267 FGSG_12548 FGSG_16349 FGSG_07891 FGSG_07944 FGSG_16895 FGSG_08623	291	2.1	0.647619	1
01.05.05 C-1 compound metabolism	1	0.13	FGSG_02944	25	0.18	0.722222	1
01.05.05.07 C-1 compound catabolism	1	0.13	FGSG_02944	17	0.12	1.08333	0.604614
01.05.06 C-2 compound and organic acid metabolism	6	0.81	FGSG_00139 FGSG_02203 FGSG_03984 FGSG_12368 FGSG_16351 FGSG_09364	45	0.32	2.53125	0.0305999
01.05.06.07 C-2 compound and organic acid catabolism	4	0.54	FGSG_00139 FGSG_12368 FGSG_16351 FGSG_09364	39	0.28	1.92857	0.150702
01.05.09 aminosaccharide metabolism	1	0.13	FGSG_05624	66	0.47	0.276596	1
01.05.09.04 aminosaccharide anabolism	1	0.13	FGSG_05624	39	0.28	0.464286	1
01.05.11 aromate metabolism	7	0.95	FGSG_11554 FGSG_03880 FGSG_03173 FGSG_05159 FGSG_05704 FGSG_06539 FGSG_13185	87	0.62	1.53226	0.178741
01.05.11.04 aromate anabolism	2	0.27	FGSG_03880 FGSG_05704	16	0.11	2.45455	0.207406
01.05.11.07 aromate catabolism	4	0.54	FGSG_11554 FGSG_05159 FGSG_06539 FGSG_13185	62	0.44	1.22727	0.419631
01.05.11.07.01 aerobic aromate catabolism	4	0.54	FGSG_11554 FGSG_05159 FGSG_06539 FGSG_13185	60	0.43	1.25581	0.395362
01.05.13 transfer of activated C-1 groups	4	0.54	FGSG_03414 FGSG_12571 FGSG_05184 FGSG_05591	84	0.6	0.9	1
01.05.13.01 S-adenosyl-methionine - homocysteine cycle	2	0.27	FGSG_05184 FGSG_05591	33	0.23	1.17391	0.5292
01.05.13.03 tetrahydrofolate-dependent C-1-transfer	1	0.13	FGSG_03414	17	0.12	1.08333	0.604614
01.05.25 regulation of C-compound and carbohydrate metabolism	14	1.9	FGSG_00404 FGSG_02449 FGSG_02641 FGSG_15994 FGSG_12358 FGSG_03014 FGSG_16339 FGSG_16851 FGSG_09065 FGSG_09837 FGSG_17180 FGSG_10660 FGSG_10889 FGSG_17655	208	1.5	1.26667	0.216146
20.01.07 amino acid/amino acid derivatives transport	19	2.58	FGSG_02278 FGSG_15955 FGSG_12341 FGSG_03751 FGSG_03516 FGSG_03412 FGSG_02950 FGSG_04943 FGSG_05574 FGSG_05859 FGSG_06537 FGSG_06551 FGSG_07888 FGSG_08347 FGSG_08055 FGSG_09053 FGSG_09354 FGSG_10375 FGSG_11250	120	0.86	3	1.74233e-05
01.06.02 membrane lipid metabolism	10	1.36	FGSG_00287 FGSG_00960 FGSG_01640 FGSG_01836 FGSG_02459 FGSG_04333 FGSG_05591 FGSG_08024 FGSG_09255 FGSG_11227	156	1.12	1.21429	0.31575
01.06.02.01 phospholipid metabolism	6	0.81	FGSG_00287 FGSG_00960 FGSG_04333 FGSG_05591 FGSG_09255 FGSG_11227	125	0.9	0.9	1
01.06.02.02 glycolipid metabolism	5	0.68	FGSG_00960 FGSG_01640 FGSG_01836 FGSG_02459 FGSG_08024	39	0.28	2.42857	0.0538843
01.06.05 fatty acid metabolism	12	1.63	FGSG_02459 FGSG_16055 FGSG_03984 FGSG_03838 FGSG_03546 FGSG_16579 FGSG_07596 FGSG_07640 FGSG_13196 FGSG_08024 FGSG_17346 FGSG_11409	157	1.13	1.44248	0.130406
01.06.06 isoprenoid metabolism	17	2.31	FGSG_02346 FGSG_02459 FGSG_02672 FGSG_15680 FGSG_04251 FGSG_03818 FGSG_03443 FGSG_03303 FGSG_04717 FGSG_04757 FGSG_16579 FGSG_13176 FGSG_08596 FGSG_09088 FGSG_17383 FGSG_17598 FGSG_17744	184	1.33	1.73684	0.0185662
01.06.06.05 sesquiterpenes metabolism	2	0.27	FGSG_15680 FGSG_13176	20	0.14	1.92857	0.287494
01.06.06.07 diterpenes metabolism	2	0.27	FGSG_02672 FGSG_04717	12	0.08	3.375	0.130675
01.06.06.11 tetracyclic and pentacyclic triterpenes (cholesterin, steroids and hopanoids) metabolism	13	1.77	FGSG_02346 FGSG_02459 FGSG_02672 FGSG_04251 FGSG_03818 FGSG_03443 FGSG_03303 FGSG_04757 FGSG_16579 FGSG_09088 FGSG_17383 FGSG_17598 FGSG_17744	136	0.98	1.80612	0.0286929
01.06.10 regulation of lipid, fatty acid and isoprenoid metabolism	1	0.13	FGSG_00774	39	0.28	0.464286	1
20.09.18.07 non-vesicular cellular import	32	4.35	FGSG_00197 FGSG_00219 FGSG_00334 FGSG_01712 FGSG_01785 FGSG_02281 FGSG_02641 FGSG_15955 FGSG_04057 FGSG_12341 FGSG_03934 FGSG_12358 FGSG_03834 FGSG_03744 FGSG_12415 FGSG_03412 FGSG_03369 FGSG_03233 FGSG_16260 FGSG_04943 FGSG_05574 FGSG_05707 FGSG_07134 FGSG_13444 FGSG_09053 FGSG_09819 FGSG_11150 FGSG_10747 FGSG_11480 FGSG_11439 FGSG_11275 FGSG_11250	278	2.01	2.16418	3.09135e-05
01.07.01 biosynthesis of vitamins, cofactors, and prosthetic groups	17	2.31	FGSG_00109 FGSG_00427 FGSG_00685 FGSG_02168 FGSG_02539 FGSG_04686 FGSG_16351 FGSG_04828 FGSG_05036 FGSG_05111 FGSG_05859 FGSG_16847 FGSG_08596 FGSG_17047 FGSG_13514 FGSG_09141 FGSG_10534	179	1.29	1.7907	0.0145017
16.21 complex cofactor/cosubstrate/vitamine binding	49	6.67	FGSG_00049 FGSG_00139 FGSG_00427 FGSG_01389 FGSG_01465 FGSG_01730 FGSG_02168 FGSG_02203 FGSG_02279 FGSG_02346 FGSG_02599 FGSG_02672 FGSG_02751 FGSG_15680 FGSG_15784 FGSG_04686 FGSG_04251 FGSG_03984 FGSG_03898 FGSG_03880 FGSG_12365 FGSG_03546 FGSG_03443 FGSG_03431 FGSG_03414 FGSG_03181 FGSG_04708 FGSG_04717 FGSG_04828 FGSG_05704 FGSG_16579 FGSG_06515 FGSG_06539 FGSG_07023 FGSG_07596 FGSG_16847 FGS…	514	3.71	1.79784	4.91306e-05
01.07.04 utilization of vitamins, cofactors, and prosthetic groups	2	0.27	FGSG_07783 FGSG_08329	20	0.14	1.92857	0.287494
01.07.07 regulation of the metabolism of vitamins, cofactors, and prosthetic groups	1	0.13	FGSG_16351	12	0.08	1.625	0.480486
01.08 metabolism of intercellular mediators	1	0.13	FGSG_01730	9	0.06	2.16667	0.388042
01.08.02 metabolism of hormones	1	0.13	FGSG_01730	5	0.03	4.33333	0.238746
20.09.18 cellular import	49	6.67	FGSG_00197 FGSG_00219 FGSG_00334 FGSG_01712 FGSG_01785 FGSG_02278 FGSG_02281 FGSG_02641 FGSG_15955 FGSG_04057 FGSG_12341 FGSG_03934 FGSG_12358 FGSG_03834 FGSG_03744 FGSG_03692 FGSG_12415 FGSG_03477 FGSG_03412 FGSG_03369 FGSG_03233 FGSG_03014 FGSG_16260 FGSG_04943 FGSG_05159 FGSG_05160 FGSG_05574 FGSG_05707 FGSG_05859 FGSG_06551 FGSG_07134 FGSG_07422 FGSG_13185 FGSG_07894 FGSG_16662 FGSG_08466 FGS…	519	3.75	1.77867	6.27221e-05
01.20.01 metabolism of primary metabolic sugar derivatives	2	0.27	FGSG_05591 FGSG_08024	26	0.18	1.5	0.405035
01.20.01.05 metabolism of sugar alcohols	1	0.13	FGSG_08024	6	0.04	3.25	0.279174
01.20.01.07 metabolism of glycosides	1	0.13	FGSG_05591	5	0.03	4.33333	0.238746
01.20.05 metabolism of acetic acid derivatives	4	0.54	FGSG_02203 FGSG_03546 FGSG_03340 FGSG_16579	56	0.4	1.35	0.346447
01.20.05.09 metabolism of eicosanoids	1	0.13	FGSG_16579	17	0.12	1.08333	0.604614
01.20.05.11 metabolism of polyketides	1	0.13	FGSG_03340	26	0.18	0.722222	1
01.20.15 metabolism of derivatives of dehydroquinic acid, shikimic acid and chorismic acid	2	0.27	FGSG_03880 FGSG_05704	36	0.26	1.03846	0.576773
01.20.17 metabolism of secondary products derived from primary amino acids	5	0.68	FGSG_02279 FGSG_03898 FGSG_13450 FGSG_08024 FGSG_11399	96	0.69	0.985507	1
01.20.17.03 metabolism of amines	1	0.13	FGSG_02279	35	0.25	0.52	1
01.20.17.09 metabolism of alkaloids	4	0.54	FGSG_03898 FGSG_13450 FGSG_08024 FGSG_11399	31	0.22	2.45455	0.0796558
01.20.19 metabolism of secondary products derived from glycine, L-serine and L-alanine	2	0.27	FGSG_05159 FGSG_13185	32	0.23	1.17391	0.512554
01.20.19.01 metabolism of porphyrins	2	0.27	FGSG_05159 FGSG_13185	25	0.18	1.5	0.385988
20.03 transport facilities	68	9.26	FGSG_00046 FGSG_00197 FGSG_00219 FGSG_00226 FGSG_00287 FGSG_11755 FGSG_01712 FGSG_02278 FGSG_02343 FGSG_02641 FGSG_04580 FGSG_04512 FGSG_04178 FGSG_04057 FGSG_12341 FGSG_03934 FGSG_03834 FGSG_03744 FGSG_12415 FGSG_03541 FGSG_03504 FGSG_03477 FGSG_03460 FGSG_03412 FGSG_03396 FGSG_03369 FGSG_03151 FGSG_03033 FGSG_03032 FGSG_16260 FGSG_16327 FGSG_16391 FGSG_16401 FGSG_04943 FGSG_05159 FGSG_05160 FGS…	808	5.84	1.58562	9.77851e-05
01.20.29 metabolism of secondary products derived from L-glutamic acid, L-proline and L-ornithine	2	0.27	FGSG_07023 FGSG_08596	11	0.07	3.85714	0.112708
01.20.31 metabolism of secondary products derived from L-lysine, L-arginine and L-histidine	3	0.4	FGSG_03181 FGSG_07023 FGSG_10194	15	0.1	4	0.0420442
01.20.33 metabolism of secondary products derived from L-tryptophan	3	0.4	FGSG_03181 FGSG_09695 FGSG_10194	15	0.1	4	0.0420442
01.20.35 metabolism of secondary products derived from L-phenylalanine and L-tyrosine	7	0.95	FGSG_02165 FGSG_16047 FGSG_03838 FGSG_05159 FGSG_13185 FGSG_11420 FGSG_17540	68	0.49	1.93878	0.068195
01.20.35.01 metabolism of phenylpropanoids	7	0.95	FGSG_02165 FGSG_16047 FGSG_03838 FGSG_05159 FGSG_13185 FGSG_11420 FGSG_17540	62	0.44	2.15909	0.0452043
01.20.35.01.01 metabolism of melanins	5	0.68	FGSG_16047 FGSG_03838 FGSG_05159 FGSG_13185 FGSG_11420	32	0.23	2.95652	0.0254584
01.20.36 non-ribosomal peptide synthesis	1	0.13	FGSG_10617	24	0.17	0.764706	1
01.20.37 metabolism of peptide derived compounds	5	0.68	FGSG_00172 FGSG_04902 FGSG_13166 FGSG_09099 FGSG_09141	60	0.43	1.5814	0.212389
01.20.37.01 metabolism of thioredoxin, glutaredoxin, glutathion	3	0.4	FGSG_00172 FGSG_04902 FGSG_09141	21	0.15	2.66667	0.0974016
01.20.37.05 metabolism of beta-lactams	2	0.27	FGSG_13166 FGSG_09099	19	0.13	2.07692	0.26742
01.25 extracellular metabolism	4	0.54	FGSG_00423 FGSG_05159 FGSG_13166 FGSG_13185	74	0.53	1.01887	0.557972
01.25.07 extracellular ester compound degradation	2	0.27	FGSG_00423 FGSG_13166	16	0.11	2.45455	0.207406
01.25.09 extracellular lignin degradation	2	0.27	FGSG_05159 FGSG_13185	13	0.09	3	0.149237
02 ENERGY	35	4.76	FGSG_00053 FGSG_00139 FGSG_02146 FGSG_02165 FGSG_04512 FGSG_03984 FGSG_12365 FGSG_12368 FGSG_03710 FGSG_03546 FGSG_03431 FGSG_03288 FGSG_03014 FGSG_16211 FGSG_16351 FGSG_04755 FGSG_05592 FGSG_06149 FGSG_06515 FGSG_06528 FGSG_06553 FGSG_07596 FGSG_08623 FGSG_08596 FGSG_08343 FGSG_08054 FGSG_17047 FGSG_09348 FGSG_09364 FGSG_09557 FGSG_09720 FGSG_09837 FGSG_10450 FGSG_17346 FGSG_11193	609	4.4	1.08182	0.336543
02.01 glycolysis and gluconeogenesis	6	0.81	FGSG_02165 FGSG_03288 FGSG_03014 FGSG_17047 FGSG_09364 FGSG_09837	112	0.81	1	0.550389
02.01.01 glycolysis methylglyoxal bypass	1	0.13	FGSG_17047	7	0.05	2.6	0.317458
02.01.03 regulation of glycolysis and gluconeogenesis	2	0.27	FGSG_03014 FGSG_09837	20	0.14	1.92857	0.287494
02.07 pentose-phosphate pathway	2	0.27	FGSG_06553 FGSG_17346	47	0.33	0.818182	1
02.10 tricarboxylic-acid pathway (citrate cycle, Krebs cycle, TCA cycle)	1	0.13	FGSG_06515	54	0.39	0.333333	1
02.11 electron transport and membrane-associated energy conservation	10	1.36	FGSG_00139 FGSG_04512 FGSG_03984 FGSG_03710 FGSG_04755 FGSG_06528 FGSG_08343 FGSG_09348 FGSG_09720 FGSG_10450	166	1.2	1.13333	0.387014
02.13 respiration	5	0.68	FGSG_00139 FGSG_03984 FGSG_16351 FGSG_05592 FGSG_09557	186	1.34	0.507463	1
01.20 secondary metabolism	55	7.49	FGSG_00048 FGSG_00053 FGSG_00172 FGSG_01819 FGSG_02165 FGSG_02203 FGSG_02279 FGSG_02672 FGSG_15680 FGSG_15682 FGSG_11554 FGSG_16047 FGSG_16055 FGSG_04596 FGSG_04595 FGSG_03898 FGSG_03880 FGSG_03838 FGSG_03745 FGSG_03546 FGSG_03542 FGSG_03340 FGSG_03181 FGSG_16175 FGSG_04717 FGSG_04902 FGSG_05159 FGSG_05184 FGSG_05591 FGSG_05704 FGSG_16579 FGSG_06539 FGSG_07023 FGSG_13166 FGSG_13185 FGSG_07888 FGS…	627	4.53	1.65342	0.000161989
10.01.05.01 DNA repair	29	3.95	FGSG_00140 FGSG_00361 FGSG_00551 FGSG_11814 FGSG_00844 FGSG_01545 FGSG_01614 FGSG_01929 FGSG_02540 FGSG_02727 FGSG_15791 FGSG_04386 FGSG_05013 FGSG_05269 FGSG_05905 FGSG_06395 FGSG_16572 FGSG_16632 FGSG_06867 FGSG_07112 FGSG_07413 FGSG_16722 FGSG_08889 FGSG_08650 FGSG_08372 FGSG_09259 FGSG_09509 FGSG_17197 FGSG_17260	267	1.93	2.04663	0.000200095
02.16.03 lactate fermentation	2	0.27	FGSG_03984 FGSG_06553	18	0.13	2.07692	0.247339
02.16.03.03 heterofermentative pathway and fermentaton of other saccharides	1	0.13	FGSG_06553	2	0.01	13	0.103362
02.16.05 butyrate and butanol-acetoine fermentation	1	0.13	FGSG_11193	2	0.01	13	0.103362
02.19 metabolism of energy reserves (e.g. glycogen, trehalose)	2	0.27	FGSG_02146 FGSG_08623	52	0.37	0.72973	1
02.25 oxidation of fatty acids	3	0.4	FGSG_03546 FGSG_16211 FGSG_07596	56	0.4	1	0.577164
02.45 energy conversion and regeneration	5	0.68	FGSG_03710 FGSG_04755 FGSG_06149 FGSG_06528 FGSG_10450	91	0.65	1.04615	0.533968
02.45.11 conversion to kinetic energy (e.g. movement)	1	0.13	FGSG_06149	24	0.17	0.764706	1
10 CELL CYCLE AND DNA PROCESSING	46	6.26	FGSG_00140 FGSG_00361 FGSG_00551 FGSG_11814 FGSG_00774 FGSG_00844 FGSG_01212 FGSG_01545 FGSG_01614 FGSG_01929 FGSG_02540 FGSG_02727 FGSG_15791 FGSG_04386 FGSG_12445 FGSG_04890 FGSG_05013 FGSG_05269 FGSG_05905 FGSG_06149 FGSG_06395 FGSG_16572 FGSG_16632 FGSG_06867 FGSG_07112 FGSG_13130 FGSG_07413 FGSG_07592 FGSG_07944 FGSG_16662 FGSG_16722 FGSG_08889 FGSG_08887 FGSG_08650 FGSG_08596 FGSG_08372 FGS…	1080	7.81	0.801536	1
10.01 DNA processing	33	4.49	FGSG_00140 FGSG_00361 FGSG_00551 FGSG_11814 FGSG_00844 FGSG_01212 FGSG_01545 FGSG_01614 FGSG_01929 FGSG_02540 FGSG_02727 FGSG_15791 FGSG_04386 FGSG_05013 FGSG_05269 FGSG_05905 FGSG_06395 FGSG_16572 FGSG_16632 FGSG_06867 FGSG_07112 FGSG_07413 FGSG_16722 FGSG_08889 FGSG_08887 FGSG_08650 FGSG_08596 FGSG_08372 FGSG_09259 FGSG_09509 FGSG_17197 FGSG_17260 FGSG_10307	595	4.3	1.04419	0.422614
10.01.02 DNA topology	9	1.22	FGSG_00551 FGSG_01545 FGSG_05013 FGSG_06395 FGSG_16572 FGSG_06867 FGSG_07413 FGSG_08650 FGSG_09509	98	0.7	1.74286	0.0758211
10.01.03 DNA synthesis and replication	8	1.08	FGSG_00551 FGSG_01212 FGSG_04386 FGSG_16632 FGSG_06867 FGSG_08650 FGSG_09509 FGSG_10307	144	1.04	1.03846	0.499459
10.01.03.03 ori recognition and priming complex formation	1	0.13	FGSG_01212	23	0.16	0.8125	1
10.01.03.05 extension/ polymerization activity	4	0.54	FGSG_04386 FGSG_16632 FGSG_06867 FGSG_09509	47	0.33	1.63636	0.238138
20.01.01.01.01 heavy metal ion transport (Cu+, Fe3+, etc.)	15	2.04	FGSG_00334 FGSG_12341 FGSG_03744 FGSG_03692 FGSG_03412 FGSG_03032 FGSG_05159 FGSG_05160 FGSG_05574 FGSG_13185 FGSG_07894 FGSG_08466 FGSG_09053 FGSG_10617 FGSG_11275	99	0.71	2.87324	0.000217088
01.07 metabolism of vitamins, cofactors, and prosthetic groups	34	4.63	FGSG_00109 FGSG_00427 FGSG_00685 FGSG_02168 FGSG_02203 FGSG_02539 FGSG_02599 FGSG_02672 FGSG_04686 FGSG_04251 FGSG_03818 FGSG_03710 FGSG_03303 FGSG_16351 FGSG_04755 FGSG_04757 FGSG_04828 FGSG_05036 FGSG_05111 FGSG_05859 FGSG_06539 FGSG_07678 FGSG_07783 FGSG_16847 FGSG_08596 FGSG_08329 FGSG_17047 FGSG_13514 FGSG_09141 FGSG_10450 FGSG_10534 FGSG_17383 FGSG_10993 FGSG_11275	346	2.5	1.852	0.000398138
01.05 C-compound and carbohydrate metabolism	111	15.1	FGSG_00053 FGSG_00139 FGSG_00404 FGSG_00427 FGSG_00578 FGSG_00960 FGSG_01621 FGSG_01640 FGSG_01785 FGSG_01819 FGSG_02146 FGSG_02165 FGSG_02203 FGSG_02279 FGSG_02281 FGSG_02449 FGSG_02599 FGSG_02641 FGSG_02751 FGSG_15682 FGSG_15784 FGSG_15994 FGSG_11554 FGSG_16055 FGSG_04686 FGSG_04596 FGSG_04595 FGSG_04251 FGSG_04024 FGSG_03984 FGSG_03922 FGSG_03898 FGSG_03880 FGSG_12358 FGSG_12365 FGSG_12368 FGS…	1547	11.1	1.36036	0.000508805
20.01.01.01 cation transport (H+, Na+, K+, Ca2+ , NH4+, etc.)	28	3.81	FGSG_00140 FGSG_00334 FGSG_11755 FGSG_04580 FGSG_04512 FGSG_04178 FGSG_04057 FGSG_12341 FGSG_03834 FGSG_03744 FGSG_03692 FGSG_03412 FGSG_03032 FGSG_05159 FGSG_05160 FGSG_05574 FGSG_13185 FGSG_07860 FGSG_07894 FGSG_16662 FGSG_08466 FGSG_08343 FGSG_17015 FGSG_09053 FGSG_09232 FGSG_10617 FGSG_11275 FGSG_11272	269	1.94	1.96392	0.000512599
32.01.09 DNA damage response	18	2.45	FGSG_00140 FGSG_00361 FGSG_11814 FGSG_00844 FGSG_01614 FGSG_01929 FGSG_02727 FGSG_15791 FGSG_05269 FGSG_05905 FGSG_16572 FGSG_07112 FGSG_07413 FGSG_16722 FGSG_08889 FGSG_08372 FGSG_09259 FGSG_17197	145	1.04	2.35577	0.000669433
10.01.09 DNA restriction or modification	7	0.95	FGSG_00551 FGSG_04386 FGSG_05013 FGSG_16572 FGSG_06867 FGSG_08887 FGSG_10307	282	2.03	0.46798	1
10.01.09.01 DNA methylation	1	0.13	FGSG_05013	5	0.03	4.33333	0.238746
10.01.09.03 DNA restriction	1	0.13	FGSG_04386	5	0.03	4.33333	0.238746
10.01.09.05 DNA conformation modification (e.g. chromatin)	6	0.81	FGSG_00551 FGSG_05013 FGSG_16572 FGSG_06867 FGSG_08887 FGSG_10307	274	1.98	0.409091	1
10.03 cell cycle	28	3.81	FGSG_00361 FGSG_00551 FGSG_11814 FGSG_00774 FGSG_00844 FGSG_01929 FGSG_02727 FGSG_04386 FGSG_12445 FGSG_04890 FGSG_05013 FGSG_05269 FGSG_06149 FGSG_06867 FGSG_07112 FGSG_13130 FGSG_07592 FGSG_07944 FGSG_16662 FGSG_08887 FGSG_08372 FGSG_09259 FGSG_09772 FGSG_17197 FGSG_11025 FGSG_10889 FGSG_10815 FGSG_10728	705	5.09	0.748527	1
10.03.01 mitotic cell cycle and cell cycle control	21	2.86	FGSG_00361 FGSG_00551 FGSG_11814 FGSG_00774 FGSG_02727 FGSG_12445 FGSG_04890 FGSG_05013 FGSG_05269 FGSG_06867 FGSG_07112 FGSG_16662 FGSG_08887 FGSG_08372 FGSG_09259 FGSG_09772 FGSG_17197 FGSG_11025 FGSG_10889 FGSG_10815 FGSG_10728	507	3.66	0.781421	1
10.03.01.01 mitotic cell cycle	12	1.63	FGSG_00361 FGSG_00551 FGSG_12445 FGSG_05013 FGSG_05269 FGSG_08887 FGSG_08372 FGSG_09772 FGSG_11025 FGSG_10889 FGSG_10815 FGSG_10728	203	1.46	1.11644	0.393108
10.03.01.01.01 G1 phase of mitotic cell cycle	2	0.27	FGSG_10889 FGSG_10815	35	0.25	1.08	0.561314
10.03.01.01.05 S phase of mitotic cell cycle	3	0.4	FGSG_12445 FGSG_05269 FGSG_08372	14	0.1	4	0.0349797
10.03.01.01.09 G2/M transition of mitotic cell cycle	1	0.13	FGSG_09772	43	0.31	0.419355	1
10.03.01.01.11 M phase	6	0.81	FGSG_00361 FGSG_00551 FGSG_05013 FGSG_08887 FGSG_10815 FGSG_10728	78	0.56	1.44643	0.232959
34.01.01.01 homeostasis of metal ions (Na, K, Ca etc.)	23	3.13	FGSG_00334 FGSG_04580 FGSG_04512 FGSG_04057 FGSG_12341 FGSG_03834 FGSG_03744 FGSG_03692 FGSG_03412 FGSG_03032 FGSG_05159 FGSG_05160 FGSG_05574 FGSG_13185 FGSG_07679 FGSG_07860 FGSG_08466 FGSG_09053 FGSG_09232 FGSG_10617 FGSG_10889 FGSG_11275 FGSG_11272	208	1.5	2.08667	0.000689428
10.03.02 meiosis	9	1.22	FGSG_00551 FGSG_11814 FGSG_00774 FGSG_00844 FGSG_01929 FGSG_04386 FGSG_06867 FGSG_10889 FGSG_10728	124	0.89	1.37079	0.212799
10.03.02.01 meiosis I	3	0.4	FGSG_11814 FGSG_00774 FGSG_10728	11	0.07	5.71429	0.0178472
10.03.03 cytokinesis (cell division) /septum formation and hydrolysis	7	0.95	FGSG_00361 FGSG_05013 FGSG_13130 FGSG_07592 FGSG_07944 FGSG_16662 FGSG_10728	169	1.22	0.778689	1
10.03.04 nuclear and chromosomal cycle	6	0.81	FGSG_00551 FGSG_04890 FGSG_06149 FGSG_09772 FGSG_10815 FGSG_10728	105	0.75	1.08	0.486777
10.03.04.03 chromosome condensation	1	0.13	FGSG_09772	23	0.16	0.8125	1
10.03.04.05 chromosome segregation/division	4	0.54	FGSG_00551 FGSG_06149 FGSG_10815 FGSG_10728	57	0.41	1.31707	0.358695
10.03.04.09 nuclear migration	1	0.13	FGSG_04890	17	0.12	1.08333	0.604614
10.03.05 cell cycle dependent cytoskeleton reorganization	1	0.13	FGSG_04890	64	0.46	0.282609	1
10.03.05.01 spindle pole body/centrosome and microtubule cycle	1	0.13	FGSG_04890	52	0.37	0.351351	1
11 TRANSCRIPTION	55	7.49	FGSG_00340 FGSG_00404 FGSG_00774 FGSG_01212 FGSG_01426 FGSG_01465 FGSG_01545 FGSG_02540 FGSG_15697 FGSG_15791 FGSG_15963 FGSG_15994 FGSG_16056 FGSG_11614 FGSG_04151 FGSG_03880 FGSG_03818 FGSG_03303 FGSG_03294 FGSG_02972 FGSG_16339 FGSG_16351 FGSG_04757 FGSG_05002 FGSG_05013 FGSG_05131 FGSG_05220 FGSG_05704 FGSG_12890 FGSG_06395 FGSG_16528 FGSG_16572 FGSG_06867 FGSG_07258 FGSG_07592 FGSG_16663 FGS…	1225	8.86	0.845372	1
11.02 RNA synthesis	46	6.26	FGSG_00404 FGSG_00774 FGSG_01212 FGSG_01426 FGSG_01545 FGSG_02540 FGSG_15697 FGSG_15791 FGSG_15963 FGSG_15994 FGSG_16056 FGSG_11614 FGSG_03880 FGSG_03294 FGSG_02972 FGSG_16339 FGSG_16351 FGSG_05013 FGSG_05131 FGSG_05220 FGSG_05704 FGSG_12890 FGSG_06395 FGSG_16528 FGSG_16572 FGSG_06867 FGSG_07592 FGSG_16663 FGSG_16738 FGSG_16851 FGSG_16922 FGSG_08889 FGSG_08831 FGSG_08650 FGSG_08432 FGSG_09065 FGS…	960	6.94	0.902017	1
11.02.02 tRNA synthesis	2	0.27	FGSG_05131 FGSG_08650	55	0.39	0.692308	1
11.02.03 mRNA synthesis	44	5.99	FGSG_00404 FGSG_00774 FGSG_01212 FGSG_01426 FGSG_01545 FGSG_02540 FGSG_15697 FGSG_15791 FGSG_15963 FGSG_15994 FGSG_16056 FGSG_11614 FGSG_03880 FGSG_03294 FGSG_02972 FGSG_16339 FGSG_16351 FGSG_05013 FGSG_05220 FGSG_05704 FGSG_12890 FGSG_06395 FGSG_16528 FGSG_16572 FGSG_06867 FGSG_07592 FGSG_16663 FGSG_16738 FGSG_16851 FGSG_16922 FGSG_08889 FGSG_08831 FGSG_08432 FGSG_09065 FGSG_09837 FGSG_17180 FGS…	880	6.36	0.941824	1
11.02.03.01 general transcription activities	4	0.54	FGSG_15697 FGSG_16339 FGSG_10914 FGSG_11462	192	1.38	0.391304	1
11.02.03.04 transcriptional control	40	5.44	FGSG_00404 FGSG_00774 FGSG_01212 FGSG_01426 FGSG_02540 FGSG_15697 FGSG_15791 FGSG_15963 FGSG_15994 FGSG_16056 FGSG_11614 FGSG_03880 FGSG_03294 FGSG_02972 FGSG_16339 FGSG_16351 FGSG_05013 FGSG_05704 FGSG_12890 FGSG_16528 FGSG_16572 FGSG_06867 FGSG_07592 FGSG_16663 FGSG_16738 FGSG_16851 FGSG_16922 FGSG_08889 FGSG_08831 FGSG_09065 FGSG_09837 FGSG_17180 FGSG_10307 FGSG_10538 FGSG_10660 FGSG_10980 FGS…	765	5.53	0.983725	1
11.02.03.04.01 transcription activation	14	1.9	FGSG_15994 FGSG_11614 FGSG_02972 FGSG_16351 FGSG_05013 FGSG_16528 FGSG_16572 FGSG_16663 FGSG_16738 FGSG_16922 FGSG_08831 FGSG_09065 FGSG_09837 FGSG_10914	189	1.36	1.39706	0.130484
11.02.03.04.03 transcription repression	4	0.54	FGSG_03880 FGSG_05013 FGSG_05704 FGSG_07592	111	0.8	0.675	1
11.02.03.04.05 enhancer/silencer interaction	1	0.13	FGSG_01212	5	0.03	4.33333	0.238746
11.04 RNA processing	15	2.04	FGSG_00340 FGSG_01545 FGSG_04151 FGSG_03818 FGSG_03303 FGSG_04757 FGSG_05002 FGSG_05220 FGSG_06395 FGSG_06867 FGSG_07258 FGSG_08650 FGSG_08432 FGSG_10307 FGSG_17383	442	3.19	0.639498	1
11.04.01 rRNA processing	6	0.81	FGSG_00340 FGSG_01545 FGSG_05002 FGSG_06395 FGSG_07258 FGSG_08650	187	1.35	0.6	1
11.04.02 tRNA processing	1	0.13	FGSG_08650	64	0.46	0.282609	1
11.04.03 mRNA processing (splicing, 5^-, 3^-end processing)	12	1.63	FGSG_01545 FGSG_04151 FGSG_03818 FGSG_03303 FGSG_04757 FGSG_05002 FGSG_05220 FGSG_06395 FGSG_06867 FGSG_08650 FGSG_08432 FGSG_17383	277	2	0.815	1
11.04.03.01 splicing	9	1.22	FGSG_01545 FGSG_03818 FGSG_03303 FGSG_04757 FGSG_05002 FGSG_05220 FGSG_06395 FGSG_08432 FGSG_17383	214	1.54	0.792208	1
11.04.03.01.10 regulation of splicing	2	0.27	FGSG_01545 FGSG_05002	9	0.06	4.5	0.0790697
11.04.03.03 5^-end processing	1	0.13	FGSG_04151	9	0.06	2.16667	0.388042
11.04.03.11 control of mRNA stability	2	0.27	FGSG_06867 FGSG_08650	29	0.2	1.35	0.460355
11.04.05 RNA topology	2	0.27	FGSG_06867 FGSG_08650	8	0.05	5.4	0.0636847
11.06 RNA modification	3	0.4	FGSG_01465 FGSG_05131 FGSG_05220	68	0.49	0.816327	1
11.06.02 tRNA modification	3	0.4	FGSG_01465 FGSG_05131 FGSG_05220	47	0.33	1.21212	0.458599
12 PROTEIN SYNTHESIS	10	1.36	FGSG_01545 FGSG_03456 FGSG_05220 FGSG_06395 FGSG_06867 FGSG_07258 FGSG_08650 FGSG_09509 FGSG_09538 FGSG_09706	439	3.17	0.429022	1
12.01 ribosome biogenesis	2	0.27	FGSG_06395 FGSG_07258	255	1.84	0.146739	1
12.01.01 ribosomal proteins	1	0.13	FGSG_07258	165	1.19	0.109244	1
12.04 translation	3	0.4	FGSG_03456 FGSG_05220 FGSG_09538	218	1.57	0.254777	1
12.04.02 translation elongation	1	0.13	FGSG_09538	25	0.18	0.722222	1
12.07 translational control	7	0.95	FGSG_01545 FGSG_05220 FGSG_06395 FGSG_06867 FGSG_08650 FGSG_09509 FGSG_09706	84	0.6	1.58333	0.157777
12.10 aminoacyl-tRNA-synthetases	1	0.13	FGSG_03456	46	0.33	0.393939	1
14 PROTEIN FATE (folding, modification, destination)	46	6.26	FGSG_00194 FGSG_00218 FGSG_00340 FGSG_00960 FGSG_01312 FGSG_01640 FGSG_02449 FGSG_02459 FGSG_11614 FGSG_04151 FGSG_04022 FGSG_03922 FGSG_03856 FGSG_03818 FGSG_03303 FGSG_03173 FGSG_03072 FGSG_16148 FGSG_04757 FGSG_04817 FGSG_12694 FGSG_05591 FGSG_05644 FGSG_06327 FGSG_07258 FGSG_07422 FGSG_07592 FGSG_08887 FGSG_08781 FGSG_08329 FGSG_08285 FGSG_09140 FGSG_09255 FGSG_09324 FGSG_09538 FGSG_09695 FGS…	1451	10.4	0.601923	1
14.01 protein folding and stabilization	2	0.27	FGSG_07258 FGSG_09695	137	0.99	0.272727	1
14.04 protein targeting, sorting and translocation	3	0.4	FGSG_07422 FGSG_08285 FGSG_09140	314	2.27	0.176211	1
14.07 protein modification	29	3.95	FGSG_00194 FGSG_00960 FGSG_01312 FGSG_01640 FGSG_02449 FGSG_02459 FGSG_11614 FGSG_04151 FGSG_04022 FGSG_03922 FGSG_03856 FGSG_03173 FGSG_03072 FGSG_04817 FGSG_05591 FGSG_06327 FGSG_07592 FGSG_08887 FGSG_08781 FGSG_08329 FGSG_09255 FGSG_09324 FGSG_09772 FGSG_17159 FGSG_10815 FGSG_10728 FGSG_11405 FGSG_17624 FGSG_17655	851	6.15	0.642276	1
14.07.01 modification with fatty acids (e.g. myristylation, palmitylation, farnesylation)	3	0.4	FGSG_00960 FGSG_05591 FGSG_09255	46	0.33	1.21212	0.444527
14.07.02 modification with sugar residues (e.g. glycosylation, deglycosylation)	4	0.54	FGSG_01640 FGSG_03922 FGSG_09255 FGSG_17159	84	0.6	0.9	1
14.07.02.02 N-directed glycosylation, deglycosylation	1	0.13	FGSG_01640	46	0.33	0.393939	1
14.07.03 modification by phosphorylation, dephosphorylation, autophosphorylation	10	1.36	FGSG_01312 FGSG_02449 FGSG_02459 FGSG_11614 FGSG_04151 FGSG_06327 FGSG_08781 FGSG_09772 FGSG_17624 FGSG_17655	251	1.81	0.751381	1
14.07.04 modification by acetylation, deacetylation	2	0.27	FGSG_00194 FGSG_07592	82	0.59	0.457627	1
14.07.05 modification by ubiquitination, deubiquitination	4	0.54	FGSG_08887 FGSG_09324 FGSG_10815 FGSG_10728	139	1	0.54	1
14.07.09 posttranslational modification of amino acids (e.g. hydroxylation, methylation)	2	0.27	FGSG_04022 FGSG_08329	57	0.41	0.658537	1
14.07.11 protein processing (proteolytic)	3	0.4	FGSG_03173 FGSG_03072 FGSG_04817	148	1.07	0.373832	1
14.10 assembly of protein complexes	6	0.81	FGSG_12694 FGSG_05644 FGSG_07258 FGSG_08887 FGSG_09324 FGSG_09538	251	1.81	0.447514	1
14.13 protein/peptide degradation	18	2.45	FGSG_00218 FGSG_00340 FGSG_03922 FGSG_03856 FGSG_03818 FGSG_03303 FGSG_03173 FGSG_03072 FGSG_16148 FGSG_04757 FGSG_08887 FGSG_09324 FGSG_17383 FGSG_11025 FGSG_10815 FGSG_10728 FGSG_17505 FGSG_11405	443	3.2	0.765625	1
14.13.01 cytoplasmic and nuclear protein degradation	11	1.49	FGSG_03922 FGSG_03818 FGSG_03303 FGSG_16148 FGSG_04757 FGSG_08887 FGSG_09324 FGSG_17383 FGSG_10815 FGSG_10728 FGSG_11405	298	2.15	0.693023	1
14.13.01.01 proteasomal degradation (ubiquitin/proteasomal pathway)	5	0.68	FGSG_03922 FGSG_08887 FGSG_09324 FGSG_10815 FGSG_10728	173	1.25	0.544	1
14.13.04 lysosomal and vacuolar protein degradation	3	0.4	FGSG_03072 FGSG_16148 FGSG_11405	51	0.36	1.11111	0.513238
14.13.04.02 vacuolar protein degradation	2	0.27	FGSG_16148 FGSG_11405	32	0.23	1.17391	0.512554
16 PROTEIN WITH BINDING FUNCTION OR COFACTOR REQUIREMENT (structural or catalytic)	150	20.4	FGSG_00046 FGSG_00049 FGSG_00139 FGSG_00140 FGSG_00194 FGSG_00218 FGSG_00287 FGSG_00334 FGSG_00340 FGSG_00361 FGSG_00404 FGSG_00427 FGSG_00551 FGSG_11814 FGSG_00774 FGSG_00844 FGSG_00960 FGSG_01212 FGSG_01312 FGSG_01389 FGSG_01465 FGSG_01545 FGSG_01614 FGSG_01730 FGSG_01929 FGSG_02165 FGSG_02168 FGSG_02203 FGSG_02279 FGSG_02343 FGSG_02346 FGSG_02449 FGSG_02540 FGSG_02599 FGSG_02641 FGSG_02672 FGS…	3139	22.7	0.898678	1
16.01 protein binding	52	7.08	FGSG_00140 FGSG_00551 FGSG_11814 FGSG_00844 FGSG_00960 FGSG_01212 FGSG_01312 FGSG_01614 FGSG_01929 FGSG_02346 FGSG_02449 FGSG_02540 FGSG_02727 FGSG_15791 FGSG_11614 FGSG_04512 FGSG_03818 FGSG_03456 FGSG_03443 FGSG_03303 FGSG_03072 FGSG_02944 FGSG_16175 FGSG_04757 FGSG_04890 FGSG_05013 FGSG_05269 FGSG_05591 FGSG_05704 FGSG_06016 FGSG_06149 FGSG_06327 FGSG_16632 FGSG_06867 FGSG_07112 FGSG_07413 FGS…	1601	11.5	0.615652	1
16.01.01 receptor binding	1	0.13	FGSG_06016	19	0.13	1	1
16.02 peptide binding	1	0.13	FGSG_08032	11	0.07	1.85714	0.451335
16.03 nucleic acid binding	44	5.99	FGSG_00140 FGSG_00404 FGSG_00551 FGSG_11814 FGSG_00774 FGSG_00844 FGSG_01212 FGSG_01545 FGSG_01929 FGSG_02346 FGSG_02540 FGSG_02727 FGSG_15791 FGSG_04386 FGSG_03818 FGSG_03443 FGSG_03303 FGSG_03294 FGSG_02972 FGSG_04757 FGSG_05002 FGSG_05013 FGSG_05269 FGSG_05798 FGSG_05905 FGSG_16528 FGSG_16572 FGSG_16632 FGSG_06867 FGSG_07112 FGSG_16663 FGSG_16722 FGSG_16851 FGSG_08889 FGSG_08372 FGSG_09259 FGS…	811	5.86	1.02218	0.462944
16.03.01 DNA binding	36	4.9	FGSG_00140 FGSG_00404 FGSG_00551 FGSG_11814 FGSG_00774 FGSG_00844 FGSG_01212 FGSG_01929 FGSG_02346 FGSG_02540 FGSG_02727 FGSG_15791 FGSG_04386 FGSG_03443 FGSG_03294 FGSG_02972 FGSG_05013 FGSG_05269 FGSG_05905 FGSG_16528 FGSG_16572 FGSG_16632 FGSG_06867 FGSG_07112 FGSG_16663 FGSG_16722 FGSG_16851 FGSG_08889 FGSG_08372 FGSG_09259 FGSG_09509 FGSG_17180 FGSG_17197 FGSG_10307 FGSG_10660 FGSG_10980	471	3.4	1.44118	0.0177649
16.03.03 RNA binding	7	0.95	FGSG_01545 FGSG_03818 FGSG_03303 FGSG_04757 FGSG_05002 FGSG_05798 FGSG_17383	327	2.36	0.402542	1
16.06 motor protein binding	1	0.13	FGSG_06149	26	0.18	0.722222	1
16.09 lipid binding	2	0.27	FGSG_00194 FGSG_00218	68	0.49	0.55102	1
16.13 C-compound binding	3	0.4	FGSG_00340 FGSG_02641 FGSG_17744	44	0.31	1.29032	0.41597
16.13.01 sugar binding	2	0.27	FGSG_00340 FGSG_02641	26	0.18	1.5	0.405035
16.17 metal binding	34	4.63	FGSG_00218 FGSG_00334 FGSG_00361 FGSG_11814 FGSG_01312 FGSG_02165 FGSG_02279 FGSG_15680 FGSG_16047 FGSG_11614 FGSG_04512 FGSG_04386 FGSG_03922 FGSG_12365 FGSG_03856 FGSG_12368 FGSG_03431 FGSG_03032 FGSG_04828 FGSG_16579 FGSG_06867 FGSG_07413 FGSG_08889 FGSG_08650 FGSG_08466 FGSG_08054 FGSG_08032 FGSG_09364 FGSG_09557 FGSG_09916 FGSG_13829 FGSG_11025 FGSG_10889 FGSG_11420	758	5.48	0.844891	1
16.17.01 calcium binding	3	0.4	FGSG_02279 FGSG_03922 FGSG_10889	99	0.71	0.56338	1
16.17.03 potassium binding	1	0.13	FGSG_04512	6	0.04	3.25	0.279174
16.17.05 sodium binding	1	0.13	FGSG_04512	11	0.07	1.85714	0.451335
16.17.07 magnesium binding	5	0.68	FGSG_00361 FGSG_01312 FGSG_11614 FGSG_04512 FGSG_04386	111	0.8	0.85	1
16.17.09 heavy metal binding (Cu, Fe, Zn)	25	3.4	FGSG_00218 FGSG_00334 FGSG_11814 FGSG_02165 FGSG_02279 FGSG_15680 FGSG_16047 FGSG_12365 FGSG_12368 FGSG_03431 FGSG_03032 FGSG_04828 FGSG_16579 FGSG_06867 FGSG_07413 FGSG_08650 FGSG_08466 FGSG_08054 FGSG_08032 FGSG_09364 FGSG_09557 FGSG_09916 FGSG_13829 FGSG_11025 FGSG_11420	499	3.6	0.944444	1
16.19 nucleotide/nucleoside/nucleobase binding	46	6.26	FGSG_00046 FGSG_00140 FGSG_00287 FGSG_00551 FGSG_11814 FGSG_00844 FGSG_01312 FGSG_01545 FGSG_01614 FGSG_01929 FGSG_02343 FGSG_02540 FGSG_11614 FGSG_04580 FGSG_04512 FGSG_04333 FGSG_03880 FGSG_03456 FGSG_03032 FGSG_03014 FGSG_16401 FGSG_04890 FGSG_05002 FGSG_05013 FGSG_12704 FGSG_05220 FGSG_05704 FGSG_06016 FGSG_06149 FGSG_06327 FGSG_06395 FGSG_16572 FGSG_16632 FGSG_06867 FGSG_07112 FGSG_07258 FGS…	868	6.27	0.998405	1
16.19.03 ATP binding	42	5.72	FGSG_00046 FGSG_00140 FGSG_00551 FGSG_11814 FGSG_00844 FGSG_01312 FGSG_01545 FGSG_01614 FGSG_01929 FGSG_02343 FGSG_02540 FGSG_11614 FGSG_04580 FGSG_04512 FGSG_03880 FGSG_03456 FGSG_03032 FGSG_03014 FGSG_16401 FGSG_04890 FGSG_05002 FGSG_05013 FGSG_12704 FGSG_05704 FGSG_06149 FGSG_06327 FGSG_06395 FGSG_16572 FGSG_16632 FGSG_06867 FGSG_07112 FGSG_07258 FGSG_16722 FGSG_08887 FGSG_08650 FGSG_08329 FGS…	660	4.77	1.19916	0.126441
16.19.05 GTP binding	2	0.27	FGSG_05220 FGSG_06016	132	0.95	0.284211	1
34.01.01 homeostasis of cations	29	3.95	FGSG_00334 FGSG_11755 FGSG_04580 FGSG_04512 FGSG_04178 FGSG_04057 FGSG_12341 FGSG_03834 FGSG_03744 FGSG_03692 FGSG_03412 FGSG_03032 FGSG_05159 FGSG_05160 FGSG_05574 FGSG_13185 FGSG_07679 FGSG_07860 FGSG_07894 FGSG_08466 FGSG_08343 FGSG_17015 FGSG_09053 FGSG_13514 FGSG_09232 FGSG_10617 FGSG_10889 FGSG_11275 FGSG_11272	290	2.09	1.88995	0.00078641
16.21.01 heme binding	8	1.08	FGSG_02279 FGSG_02672 FGSG_15680 FGSG_04717 FGSG_04828 FGSG_16579 FGSG_09916 FGSG_17598	91	0.65	1.66154	0.109828
16.21.05 FAD/FMN binding	9	1.22	FGSG_01730 FGSG_03984 FGSG_03898 FGSG_03414 FGSG_06539 FGSG_07596 FGSG_09557 FGSG_09695 FGSG_11399	151	1.09	1.11927	0.409733
32.07 detoxification	45	6.13	FGSG_00046 FGSG_00139 FGSG_00172 FGSG_00226 FGSG_02343 FGSG_02449 FGSG_02672 FGSG_11554 FGSG_04580 FGSG_12368 FGSG_03744 FGSG_03541 FGSG_03173 FGSG_03033 FGSG_03032 FGSG_16175 FGSG_16327 FGSG_16391 FGSG_16401 FGSG_04717 FGSG_12704 FGSG_12821 FGSG_06395 FGSG_16579 FGSG_06539 FGSG_07360 FGSG_07509 FGSG_07590 FGSG_07596 FGSG_13176 FGSG_13185 FGSG_16658 FGSG_17047 FGSG_09099 FGSG_09335 FGSG_09557 FGS…	520	3.76	1.63032	0.000836619
16.21.15 biotin binding	1	0.13	FGSG_08329	8	0.05	2.6	0.353712
20.01.11 amine / polyamine transport	10	1.36	FGSG_00226 FGSG_02278 FGSG_03033 FGSG_16391 FGSG_05859 FGSG_06551 FGSG_08347 FGSG_09335 FGSG_17315 FGSG_11439	58	0.41	3.31707	0.000859976
18 REGULATION OF METABOLISM AND PROTEIN FUNCTION	13	1.77	FGSG_01312 FGSG_02449 FGSG_15791 FGSG_11614 FGSG_04151 FGSG_06016 FGSG_07258 FGSG_09706 FGSG_09837 FGSG_10889 FGSG_10815 FGSG_10728 FGSG_17655	512	3.7	0.478378	1
18.01 regulation by	5	0.68	FGSG_01312 FGSG_11614 FGSG_04151 FGSG_09837 FGSG_10889	250	1.8	0.377778	1
18.01.01 regulation by modification	3	0.4	FGSG_01312 FGSG_11614 FGSG_04151	143	1.03	0.38835	1
18.01.07 regulation by binding / dissociation	2	0.27	FGSG_09837 FGSG_10889	112	0.81	0.333333	1
18.02 regulation of protein activity	13	1.77	FGSG_01312 FGSG_02449 FGSG_15791 FGSG_11614 FGSG_04151 FGSG_06016 FGSG_07258 FGSG_09706 FGSG_09837 FGSG_10889 FGSG_10815 FGSG_10728 FGSG_17655	502	3.63	0.487603	1
18.02.01 enzymatic activity regulation / enzyme regulator	8	1.08	FGSG_01312 FGSG_02449 FGSG_06016 FGSG_07258 FGSG_09706 FGSG_10815 FGSG_10728 FGSG_17655	313	2.26	0.477876	1
18.02.01.01 enzyme activator	5	0.68	FGSG_02449 FGSG_06016 FGSG_09706 FGSG_10728 FGSG_17655	142	1.02	0.666667	1
18.02.01.01.01 GTPase activator (GAP)	1	0.13	FGSG_06016	49	0.35	0.371429	1
18.02.03 guanyl-nucleotide exchange factor (GEF)	2	0.27	FGSG_06016 FGSG_10889	28	0.2	1.35	0.44224
18.02.05 regulator of G-protein signalling	1	0.13	FGSG_10889	24	0.17	0.764706	1
18.02.07 regulator of receptor activity	1	0.13	FGSG_15791	10	0.07	1.85714	0.420551
18.02.09 regulator of transcription factor	1	0.13	FGSG_09837	106	0.76	0.171053	1
20 CELLULAR TRANSPORT, TRANSPORT FACILITIES AND TRANSPORT ROUTES	129	17.5	FGSG_00046 FGSG_00139 FGSG_00140 FGSG_00197 FGSG_00219 FGSG_00226 FGSG_00287 FGSG_00334 FGSG_11755 FGSG_01465 FGSG_01712 FGSG_01730 FGSG_01785 FGSG_02218 FGSG_02278 FGSG_02279 FGSG_02281 FGSG_02343 FGSG_02641 FGSG_02672 FGSG_15680 FGSG_15955 FGSG_04580 FGSG_04512 FGSG_04178 FGSG_04057 FGSG_03984 FGSG_12341 FGSG_03934 FGSG_12358 FGSG_03834 FGSG_03751 FGSG_03744 FGSG_03710 FGSG_03692 FGSG_12415 FGS…	2007	14.5	1.2069	0.0102709
10.01.05.03 DNA recombination	15	2.04	FGSG_00361 FGSG_00551 FGSG_11814 FGSG_00844 FGSG_01545 FGSG_01614 FGSG_01929 FGSG_02727 FGSG_06395 FGSG_16572 FGSG_16632 FGSG_06867 FGSG_07112 FGSG_08596 FGSG_09259	113	0.81	2.51852	0.000917319
20.01.01 ion transport	31	4.22	FGSG_00140 FGSG_00219 FGSG_00334 FGSG_11755 FGSG_01712 FGSG_04580 FGSG_04512 FGSG_04178 FGSG_04057 FGSG_12341 FGSG_03834 FGSG_03744 FGSG_03692 FGSG_03412 FGSG_03032 FGSG_05159 FGSG_05160 FGSG_05574 FGSG_13185 FGSG_07860 FGSG_07894 FGSG_16662 FGSG_08466 FGSG_08343 FGSG_17015 FGSG_09053 FGSG_09232 FGSG_09819 FGSG_10617 FGSG_11275 FGSG_11272	321	2.32	1.81897	0.000942094
10.01.05 DNA recombination and DNA repair	30	4.08	FGSG_00140 FGSG_00361 FGSG_00551 FGSG_11814 FGSG_00844 FGSG_01545 FGSG_01614 FGSG_01929 FGSG_02540 FGSG_02727 FGSG_15791 FGSG_04386 FGSG_05013 FGSG_05269 FGSG_05905 FGSG_06395 FGSG_16572 FGSG_16632 FGSG_06867 FGSG_07112 FGSG_07413 FGSG_16722 FGSG_08889 FGSG_08650 FGSG_08596 FGSG_08372 FGSG_09259 FGSG_09509 FGSG_17197 FGSG_17260	309	2.23	1.8296	0.00103895
20.01.01.01.01.01 siderophore-iron transport	8	1.08	FGSG_00334 FGSG_03744 FGSG_03692 FGSG_05159 FGSG_05160 FGSG_13185 FGSG_10617 FGSG_11275	41	0.29	3.72414	0.00121837
16.21.17 pyridoxal phosphate binding	10	1.36	FGSG_00049 FGSG_01389 FGSG_02168 FGSG_03181 FGSG_04708 FGSG_07023 FGSG_16847 FGSG_10194 FGSG_10534 FGSG_10993	63	0.45	3.02222	0.00165924
20.01.01.07 anion transport	3	0.4	FGSG_07894 FGSG_16662 FGSG_09819	65	0.47	0.851064	1
20.01.01.07.07 phosphate transport	1	0.13	FGSG_07894	21	0.15	0.866667	1
34 INTERACTION WITH THE ENVIRONMENT	64	8.71	FGSG_00046 FGSG_00140 FGSG_00334 FGSG_11755 FGSG_01711 FGSG_02449 FGSG_02641 FGSG_02751 FGSG_15955 FGSG_11614 FGSG_04580 FGSG_04512 FGSG_04178 FGSG_04057 FGSG_12341 FGSG_12358 FGSG_03834 FGSG_03818 FGSG_03744 FGSG_03692 FGSG_03516 FGSG_03412 FGSG_03303 FGSG_03032 FGSG_02972 FGSG_02950 FGSG_02944 FGSG_16401 FGSG_04757 FGSG_04890 FGSG_05006 FGSG_05159 FGSG_05160 FGSG_12704 FGSG_05574 FGSG_06016 FGS…	832	6.01	1.44925	0.00167255
20.01.03.01 sugar transport	6	0.81	FGSG_02641 FGSG_03369 FGSG_03233 FGSG_11150 FGSG_10747 FGSG_11480	54	0.39	2.07692	0.0653568
20.01.03.03 C4-dicarboxylate transport (e.g. malate, succinate, fumarate)	3	0.4	FGSG_01785 FGSG_02281 FGSG_09819	18	0.13	3.07692	0.0670886
20.01.27 drug/toxin transport	19	2.58	FGSG_00226 FGSG_02279 FGSG_02343 FGSG_04580 FGSG_03744 FGSG_03541 FGSG_03033 FGSG_16327 FGSG_16391 FGSG_16401 FGSG_12704 FGSG_07360 FGSG_07509 FGSG_09335 FGSG_09595 FGSG_17315 FGSG_11275 FGSG_11272 FGSG_17744	171	1.23	2.09756	0.00184149
20.01.09 peptide transport	2	0.27	FGSG_03460 FGSG_07227	22	0.15	1.8	0.3274
20.01.10 protein transport	4	0.54	FGSG_02218 FGSG_04890 FGSG_12694 FGSG_08569	246	1.77	0.305085	1
36 SYSTEMIC INTERACTION WITH THE ENVIRONMENT	5	0.68	FGSG_02346 FGSG_02449 FGSG_03443 FGSG_05184 FGSG_08081	18	0.13	5.23077	0.00199757
20.01.13 lipid/fatty acid transport	10	1.36	FGSG_00287 FGSG_02278 FGSG_15955 FGSG_04580 FGSG_05859 FGSG_06551 FGSG_16658 FGSG_08917 FGSG_08347 FGSG_11272	141	1.01	1.34653	0.216203
20.01.15 electron transport	25	3.4	FGSG_00139 FGSG_01730 FGSG_02279 FGSG_02672 FGSG_15680 FGSG_04512 FGSG_03984 FGSG_03710 FGSG_03542 FGSG_03414 FGSG_04717 FGSG_04755 FGSG_04828 FGSG_16579 FGSG_06528 FGSG_06539 FGSG_07596 FGSG_13176 FGSG_08596 FGSG_08343 FGSG_09557 FGSG_09916 FGSG_10450 FGSG_13829 FGSG_17598	398	2.87	1.18467	0.218198
20.01.17 nucleotide/nucleoside/nucleobase transport	4	0.54	FGSG_03477 FGSG_16293 FGSG_13426 FGSG_11439	29	0.2	2.7	0.065255
20.01.23 allantoin and allantoate transport	5	0.68	FGSG_00219 FGSG_01712 FGSG_12415 FGSG_13444 FGSG_11439	75	0.54	1.25926	0.367387
20.01.25 vitamine/cofactor transport	8	1.08	FGSG_00046 FGSG_15955 FGSG_12415 FGSG_03477 FGSG_05859 FGSG_07783 FGSG_16662 FGSG_13426	97	0.7	1.54286	0.143063
20.01.26 neurotransmitter transport	6	0.81	FGSG_02278 FGSG_04512 FGSG_02944 FGSG_05859 FGSG_06551 FGSG_08347	46	0.33	2.45455	0.0336697
36.20 plant / fungal specific systemic sensing and response	5	0.68	FGSG_02346 FGSG_02449 FGSG_03443 FGSG_05184 FGSG_08081	18	0.13	5.23077	0.00199757
36.20.18 plant hormonal regulation	5	0.68	FGSG_02346 FGSG_02449 FGSG_03443 FGSG_05184 FGSG_08081	18	0.13	5.23077	0.00199757
20.03.01 channel / pore class transport	4	0.54	FGSG_11755 FGSG_04178 FGSG_17015 FGSG_09232	51	0.36	1.5	0.285574
20.03.01.01 ion channels	4	0.54	FGSG_11755 FGSG_04178 FGSG_17015 FGSG_09232	32	0.23	2.34783	0.0873983
20.03.02 carrier (electrochemical potential-driven transport)	9	1.22	FGSG_00226 FGSG_03369 FGSG_16327 FGSG_05859 FGSG_07509 FGSG_07860 FGSG_09335 FGSG_11150 FGSG_10747	142	1.02	1.19608	0.341164
20.03.02.02 symporter	4	0.54	FGSG_03369 FGSG_05859 FGSG_11150 FGSG_10747	69	0.49	1.10204	0.502249
20.03.02.02.01 proton driven symporter	4	0.54	FGSG_03369 FGSG_05859 FGSG_11150 FGSG_10747	50	0.36	1.5	0.273567
20.03.02.03 antiporter	5	0.68	FGSG_00226 FGSG_16327 FGSG_07509 FGSG_07860 FGSG_09335	75	0.54	1.25926	0.367387
20.03.02.03.01 proton driven antiporter	4	0.54	FGSG_00226 FGSG_16327 FGSG_07509 FGSG_09335	45	0.32	1.6875	0.215164
20.03.22 transport ATPases	11	1.49	FGSG_02343 FGSG_04580 FGSG_04512 FGSG_03744 FGSG_16401 FGSG_12704 FGSG_16658 FGSG_08466 FGSG_08343 FGSG_11275 FGSG_11272	123	0.88	1.69318	0.0623287
32.07.05 detoxification by export	16	2.17	FGSG_00226 FGSG_02343 FGSG_04580 FGSG_03541 FGSG_03033 FGSG_03032 FGSG_16327 FGSG_16391 FGSG_16401 FGSG_12704 FGSG_07360 FGSG_07509 FGSG_09335 FGSG_09595 FGSG_17315 FGSG_11272	139	1	2.17	0.00286313
20.09 transport routes	71	9.67	FGSG_00046 FGSG_00197 FGSG_00219 FGSG_00226 FGSG_00334 FGSG_11755 FGSG_01465 FGSG_01712 FGSG_01785 FGSG_02278 FGSG_02281 FGSG_02343 FGSG_02641 FGSG_15955 FGSG_04178 FGSG_04057 FGSG_12341 FGSG_03934 FGSG_12358 FGSG_03834 FGSG_03744 FGSG_03692 FGSG_12415 FGSG_03541 FGSG_03477 FGSG_03412 FGSG_03369 FGSG_03233 FGSG_03033 FGSG_03032 FGSG_03014 FGSG_16260 FGSG_16327 FGSG_16391 FGSG_16401 FGSG_04890 FGS…	1237	8.94	1.08166	0.2574
20.09.04 mitochondrial transport	3	0.4	FGSG_15955 FGSG_12694 FGSG_06149	118	0.85	0.470588	1
20.09.07 vesicular transport (Golgi network, etc.)	4	0.54	FGSG_01465 FGSG_02278 FGSG_06551 FGSG_08466	267	1.93	0.279793	1
20.09.07.05 intra Golgi transport	2	0.27	FGSG_02278 FGSG_06551	36	0.26	1.03846	0.576773
20.09.13 vacuolar/lysosomal transport	5	0.68	FGSG_00046 FGSG_11755 FGSG_04178 FGSG_03032 FGSG_17015	170	1.22	0.557377	1
20.09.14 cytoskeleton-dependent transport	2	0.27	FGSG_04890 FGSG_06149	58	0.41	0.658537	1
20.09.14.01 tubulin dependent transport	2	0.27	FGSG_04890 FGSG_06149	24	0.17	1.58824	0.366679
20.09.16 cellular export and secretion	20	2.72	FGSG_00226 FGSG_02343 FGSG_12341 FGSG_03541 FGSG_03412 FGSG_03233 FGSG_03033 FGSG_16327 FGSG_16391 FGSG_16401 FGSG_12704 FGSG_05574 FGSG_07360 FGSG_07422 FGSG_07509 FGSG_08466 FGSG_09053 FGSG_09232 FGSG_09595 FGSG_17315	268	1.93	1.40933	0.0784334
20.09.16.01 Type I protein secretion system (ABC-type transport systems)	5	0.68	FGSG_02343 FGSG_03541 FGSG_16401 FGSG_12704 FGSG_09595	39	0.28	2.42857	0.0538843
20.09.16.07 non-vesicular cellular export	1	0.13	FGSG_17315	6	0.04	3.25	0.279174
20.01.03 C-compound and carbohydrate transport	30	4.08	FGSG_00046 FGSG_00197 FGSG_01785 FGSG_02278 FGSG_02281 FGSG_02641 FGSG_03934 FGSG_12358 FGSG_12415 FGSG_03504 FGSG_03396 FGSG_03369 FGSG_03233 FGSG_03151 FGSG_03014 FGSG_16260 FGSG_05707 FGSG_05859 FGSG_06551 FGSG_07134 FGSG_07136 FGSG_07894 FGSG_16662 FGSG_16853 FGSG_08347 FGSG_13487 FGSG_09819 FGSG_11150 FGSG_10747 FGSG_11480	332	2.4	1.7	0.00313002
10.01.05.03.03 somatic / mitotic recombination	5	0.68	FGSG_00361 FGSG_11814 FGSG_00844 FGSG_07112 FGSG_09259	20	0.14	4.85714	0.00330934
20.09.18.09 vesicular cellular import	3	0.4	FGSG_05160 FGSG_07422 FGSG_09510	125	0.9	0.444444	1
20.09.18.09.01 endocytosis	3	0.4	FGSG_05160 FGSG_07422 FGSG_09510	125	0.9	0.444444	1
30 CELLULAR COMMUNICATION/SIGNAL TRANSDUCTION MECHANISM	28	3.81	FGSG_00423 FGSG_01312 FGSG_02449 FGSG_02751 FGSG_11614 FGSG_04529 FGSG_04504 FGSG_03688 FGSG_03504 FGSG_03151 FGSG_02972 FGSG_05006 FGSG_05184 FGSG_06016 FGSG_06327 FGSG_16423 FGSG_07136 FGSG_16853 FGSG_08781 FGSG_08032 FGSG_09232 FGSG_13640 FGSG_10889 FGSG_17488 FGSG_11385 FGSG_17624 FGSG_17655 FGSG_17744	652	4.71	0.808917	1
30.01 cellular signalling	27	3.67	FGSG_00423 FGSG_01312 FGSG_02449 FGSG_02751 FGSG_11614 FGSG_04529 FGSG_04504 FGSG_03688 FGSG_03504 FGSG_03151 FGSG_02972 FGSG_05006 FGSG_05184 FGSG_06016 FGSG_06327 FGSG_16423 FGSG_07136 FGSG_16853 FGSG_08781 FGSG_08032 FGSG_09232 FGSG_13640 FGSG_10889 FGSG_17488 FGSG_11385 FGSG_17624 FGSG_17655	560	4.05	0.906173	1
30.01.05 enzyme mediated signal transduction	8	1.08	FGSG_01312 FGSG_02449 FGSG_11614 FGSG_05006 FGSG_06016 FGSG_06327 FGSG_10889 FGSG_17655	291	2.1	0.514286	1
30.01.05.01 protein kinase	3	0.4	FGSG_01312 FGSG_11614 FGSG_06327	138	0.99	0.40404	1
30.01.05.01.02 JNK cascade	1	0.13	FGSG_11614	5	0.03	4.33333	0.238746
30.01.05.01.03 MAPKKK cascade	1	0.13	FGSG_11614	30	0.21	0.619048	1
30.01.05.01.04 NIK-I-kappaB/NF-kappaB cascade	1	0.13	FGSG_11614	15	0.1	1.3	0.558982
30.01.05.01.05 tyrosine kinase	1	0.13	FGSG_06327	13	0.09	1.44444	0.50809
30.01.05.01.06 serine/threonine kinase	3	0.4	FGSG_01312 FGSG_11614 FGSG_06327	77	0.55	0.727273	1
30.01.05.05 G-protein mediated signal transduction	3	0.4	FGSG_05006 FGSG_06016 FGSG_10889	128	0.92	0.434783	1
30.01.05.05.01 small GTPase mediated signal transduction	2	0.27	FGSG_06016 FGSG_10889	98	0.7	0.385714	1
30.01.09 second messenger mediated signal transduction	2	0.27	FGSG_02751 FGSG_09232	99	0.71	0.380282	1
30.01.09.03 Ca2+ mediated signal transduction	1	0.13	FGSG_09232	34	0.24	0.541667	1
30.01.09.11 polyphosphoinositol mediated signal transduction	1	0.13	FGSG_02751	36	0.26	0.5	1
30.05 transmembrane signal transduction	9	1.22	FGSG_02449 FGSG_11614 FGSG_02972 FGSG_05006 FGSG_06327 FGSG_08781 FGSG_17624 FGSG_17655 FGSG_17744	191	1.38	0.884058	1
30.05.01 receptor enzyme mediated signalling	7	0.95	FGSG_02449 FGSG_11614 FGSG_05006 FGSG_08781 FGSG_17624 FGSG_17655 FGSG_17744	71	0.51	1.86275	0.0819031
30.05.01.10 two-component signal transduction system (sensor kinase component)	4	0.54	FGSG_02449 FGSG_08781 FGSG_17624 FGSG_17655	17	0.12	4.5	0.0107704
30.05.01.18 transmembrane receptor protein serine/threonine kinase signalling pathways	1	0.13	FGSG_11614	21	0.15	0.866667	1
30.05.01.18.01 TGF-beta-receptor signalling pathway	1	0.13	FGSG_11614	11	0.07	1.85714	0.451335
30.05.02 non-enzymatic receptor mediated signalling	2	0.27	FGSG_05006 FGSG_06327	86	0.62	0.435484	1
30.05.02.24 G-protein coupled receptor signalling pathway	1	0.13	FGSG_05006	38	0.27	0.481481	1
30.05.02.26 integrin receptor signalling pathway	1	0.13	FGSG_06327	13	0.09	1.44444	0.50809
10.01.05.03.01 meiotic recombination	6	0.81	FGSG_11814 FGSG_00844 FGSG_01614 FGSG_01929 FGSG_02727 FGSG_08596	29	0.2	4.05	0.00364668
32.01 stress response	36	4.9	FGSG_00046 FGSG_00140 FGSG_00172 FGSG_00361 FGSG_11814 FGSG_00844 FGSG_01614 FGSG_01929 FGSG_02449 FGSG_02727 FGSG_15791 FGSG_15955 FGSG_04580 FGSG_02863 FGSG_05036 FGSG_05269 FGSG_12821 FGSG_05905 FGSG_16572 FGSG_06539 FGSG_07112 FGSG_07413 FGSG_07783 FGSG_07860 FGSG_16722 FGSG_08889 FGSG_08372 FGSG_17047 FGSG_09259 FGSG_09706 FGSG_17197 FGSG_10538 FGSG_10659 FGSG_11405 FGSG_11272 FGSG_17655	697	5.04	0.972222	1
32.01.01 oxidative stress response	7	0.95	FGSG_00172 FGSG_04580 FGSG_02863 FGSG_12821 FGSG_06539 FGSG_17047 FGSG_11272	122	0.88	1.07955	0.472163
32.01.03 osmotic and salt stress response	5	0.68	FGSG_02449 FGSG_15955 FGSG_07860 FGSG_17047 FGSG_17655	90	0.65	1.04615	0.524048
32.01.04 pH stress response	1	0.13	FGSG_17047	10	0.07	1.85714	0.420551
32.01.05 heat shock response	2	0.27	FGSG_17047 FGSG_10538	43	0.31	0.870968	1
34.01 homeostasis	30	4.08	FGSG_00334 FGSG_11755 FGSG_11614 FGSG_04580 FGSG_04512 FGSG_04178 FGSG_04057 FGSG_12341 FGSG_03834 FGSG_03744 FGSG_03692 FGSG_03412 FGSG_03032 FGSG_05159 FGSG_05160 FGSG_05574 FGSG_13185 FGSG_07679 FGSG_07860 FGSG_07894 FGSG_08466 FGSG_08343 FGSG_17015 FGSG_09053 FGSG_13514 FGSG_09232 FGSG_10617 FGSG_10889 FGSG_11275 FGSG_11272	336	2.43	1.67901	0.00372978
32.01.11 nutrient starvation response	4	0.54	FGSG_07783 FGSG_09706 FGSG_10659 FGSG_11405	52	0.37	1.45946	0.297655
32.01.13 electromagnetic waves stress response (e.g. UV, X-ray)	1	0.13	FGSG_00361	14	0.1	1.3	0.53423
20.03.25 ABC transporters	13	1.77	FGSG_00046 FGSG_02343 FGSG_04580 FGSG_03744 FGSG_03541 FGSG_03032 FGSG_16401 FGSG_12704 FGSG_13514 FGSG_09595 FGSG_09706 FGSG_11275 FGSG_11272	106	0.76	2.32895	0.00398167
32.05.01 resistance proteins	14	1.9	FGSG_00046 FGSG_02343 FGSG_04580 FGSG_03541 FGSG_03033 FGSG_03032 FGSG_16327 FGSG_16401 FGSG_05159 FGSG_12704 FGSG_07360 FGSG_13185 FGSG_09595 FGSG_11272	172	1.24	1.53226	0.0737815
32.05.01.01 antibiotic resistance	1	0.13	FGSG_02343	10	0.07	1.85714	0.420551
32.05.01.03 chemical agent resistance	6	0.81	FGSG_02343 FGSG_04580 FGSG_03032 FGSG_05159 FGSG_13185 FGSG_11272	63	0.45	1.8	0.116445
32.05.01.03.01 organic chemical agent resistance	1	0.13	FGSG_02343	2	0.01	13	0.103362
32.05.01.03.03 inorganic chemical agent resistance (e.g. heavy metals)	3	0.4	FGSG_03032 FGSG_05159 FGSG_13185	15	0.1	4	0.0420442
32.05.03 defense related proteins	5	0.68	FGSG_00139 FGSG_02672 FGSG_04717 FGSG_13166 FGSG_09099	92	0.66	1.0303	0.543793
01.06 lipid, fatty acid and isoprenoid metabolism	63	8.58	FGSG_00050 FGSG_00139 FGSG_00194 FGSG_00287 FGSG_00774 FGSG_00960 FGSG_01640 FGSG_01711 FGSG_01836 FGSG_02218 FGSG_02346 FGSG_02459 FGSG_02599 FGSG_02672 FGSG_15680 FGSG_15955 FGSG_11554 FGSG_16055 FGSG_04333 FGSG_04251 FGSG_04151 FGSG_03989 FGSG_03984 FGSG_03838 FGSG_03818 FGSG_03785 FGSG_03687 FGSG_03546 FGSG_03443 FGSG_03303 FGSG_03173 FGSG_03072 FGSG_02944 FGSG_16211 FGSG_04717 FGSG_04757 FGS…	850	6.14	1.39739	0.00428286
32.05.05.01 toxins	3	0.4	FGSG_03542 FGSG_03340 FGSG_11409	62	0.44	0.909091	1
02.16 fermentation	13	1.77	FGSG_00053 FGSG_00139 FGSG_02165 FGSG_03984 FGSG_12365 FGSG_12368 FGSG_03431 FGSG_16351 FGSG_06553 FGSG_08596 FGSG_08054 FGSG_09364 FGSG_11193	109	0.78	2.26923	0.00506126
32.07.01 detoxification involving cytochrome P450	8	1.08	FGSG_02672 FGSG_04717 FGSG_16579 FGSG_07590 FGSG_07596 FGSG_13176 FGSG_09557 FGSG_09916	111	0.8	1.35	0.236588
32.07.03 detoxification by modification	3	0.4	FGSG_06539 FGSG_17047 FGSG_10912	60	0.43	0.930233	1
16.21.07 NAD/NADP binding	22	2.99	FGSG_00139 FGSG_00427 FGSG_02203 FGSG_02346 FGSG_02599 FGSG_02751 FGSG_15784 FGSG_04686 FGSG_04251 FGSG_03880 FGSG_12365 FGSG_03443 FGSG_03431 FGSG_05704 FGSG_06515 FGSG_06539 FGSG_07596 FGSG_08596 FGSG_08024 FGSG_09088 FGSG_13514 FGSG_09557	231	1.67	1.79042	0.00577022
32.07.07 oxygen and radical detoxification	5	0.68	FGSG_00172 FGSG_02449 FGSG_03173 FGSG_12821 FGSG_17655	68	0.49	1.38776	0.293145
32.07.07.03 glutathione conjugation reaction	1	0.13	FGSG_00172	15	0.1	1.3	0.558982
32.07.07.07 superoxide metabolism	1	0.13	FGSG_03173	14	0.1	1.3	0.53423
32.07.09 detoxification by degradation	4	0.54	FGSG_00139 FGSG_16175 FGSG_13185 FGSG_09099	38	0.27	2	0.140772
32.10 degradation / modification of foreign (exogenous) compounds	6	0.81	FGSG_01621 FGSG_03687 FGSG_16175 FGSG_06539 FGSG_09099 FGSG_09916	77	0.55	1.47273	0.224236
32.10.07 degradation / modification of foreign (exogenous) polysaccharides	1	0.13	FGSG_01621	31	0.22	0.590909	1
32.10.09 degradation / modification of foreign (exogenous) ester compounds	3	0.4	FGSG_03687 FGSG_16175 FGSG_09099	23	0.16	2.5	0.120148
10.03.01.03 cell cycle checkpoints (checkpoints of morphogenesis, DNA-damage,-replication, mitotic phase and spindle)	10	1.36	FGSG_00361 FGSG_11814 FGSG_12445 FGSG_05269 FGSG_07112 FGSG_08372 FGSG_09259 FGSG_17197 FGSG_10815 FGSG_10728	76	0.54	2.51852	0.0066856
34.11.12 perception of nutrients and nutritional adaptation	11	1.49	FGSG_02641 FGSG_12358 FGSG_03516 FGSG_02950 FGSG_05006 FGSG_16579 FGSG_06537 FGSG_08055 FGSG_09354 FGSG_10375 FGSG_10889	88	0.63	2.36508	0.00673091
01.07.03 catabolism of vitamins, cofactors, and prosthetic groups	3	0.4	FGSG_00427 FGSG_04686 FGSG_13514	8	0.05	8	0.00682515
01.20.21 metabolism of sulfuric acid and L-cysteine derivatives	3	0.4	FGSG_03181 FGSG_07023 FGSG_13829	8	0.05	8	0.00682515
34.01.01.03 homeostasis of protons	4	0.54	FGSG_04512 FGSG_07860 FGSG_07894 FGSG_08343	67	0.48	1.125	0.479112
34.01.03 homeostasis of anions	1	0.13	FGSG_07894	36	0.26	0.5	1
34.01.03.03 homeostasis of phosphate	1	0.13	FGSG_07894	15	0.1	1.3	0.558982
34.01.06 immune cell homeostasis	1	0.13	FGSG_11614	2	0.01	13	0.103362
34.03 membrane excitability	3	0.4	FGSG_01711 FGSG_02944 FGSG_13166	39	0.28	1.42857	0.342852
34.03.01 synaptic transmission	3	0.4	FGSG_01711 FGSG_02944 FGSG_13166	36	0.26	1.53846	0.298514
34.03.03 regulation, generation and propagation of action potential	3	0.4	FGSG_01711 FGSG_02944 FGSG_13166	19	0.13	3.07692	0.0766442
34.05 cell motility	4	0.54	FGSG_00140 FGSG_04512 FGSG_04890 FGSG_06149	138	0.99	0.545455	1
34.05.01 cell migration	1	0.13	FGSG_00140	84	0.6	0.216667	1
34.05.02 motor activity	2	0.27	FGSG_04890 FGSG_06149	26	0.18	1.5	0.405035
34.07 cell adhesion	3	0.4	FGSG_02944 FGSG_06327 FGSG_07891	38	0.27	1.48148	0.328071
34.07.01 cell-cell adhesion	2	0.27	FGSG_02944 FGSG_07891	11	0.07	3.85714	0.112708
34.07.02 cell-matrix adhesion	1	0.13	FGSG_06327	10	0.07	1.85714	0.420551
34.11 cellular sensing and response to external stimulus	29	3.95	FGSG_00046 FGSG_02449 FGSG_02641 FGSG_02751 FGSG_15955 FGSG_04512 FGSG_12358 FGSG_03818 FGSG_03692 FGSG_03516 FGSG_03303 FGSG_02972 FGSG_02950 FGSG_16401 FGSG_04757 FGSG_05006 FGSG_12704 FGSG_06016 FGSG_16579 FGSG_06537 FGSG_08781 FGSG_08055 FGSG_09065 FGSG_09354 FGSG_10375 FGSG_17383 FGSG_10889 FGSG_17624 FGSG_17655	350	2.53	1.56126	0.0117483
34.11.01 photoperception and response	5	0.68	FGSG_03818 FGSG_03303 FGSG_02972 FGSG_04757 FGSG_17383	41	0.29	2.34483	0.0644054
34.11.03 chemoperception and response	11	1.49	FGSG_00046 FGSG_02449 FGSG_02751 FGSG_15955 FGSG_16401 FGSG_12704 FGSG_06016 FGSG_08781 FGSG_09065 FGSG_17624 FGSG_17655	165	1.19	1.2521	0.26103
34.11.03.03 chemotaxis	1	0.13	FGSG_06016	9	0.06	2.16667	0.388042
34.11.03.13 osmosensing and response	6	0.81	FGSG_02449 FGSG_02751 FGSG_15955 FGSG_08781 FGSG_17624 FGSG_17655	79	0.57	1.42105	0.241786
32.05.05 virulence, disease factors	21	2.86	FGSG_00423 FGSG_01836 FGSG_02343 FGSG_04529 FGSG_03688 FGSG_03542 FGSG_03541 FGSG_03504 FGSG_03340 FGSG_03151 FGSG_12548 FGSG_16423 FGSG_16437 FGSG_07136 FGSG_16853 FGSG_17091 FGSG_17122 FGSG_17488 FGSG_11409 FGSG_11385 FGSG_11343	222	1.6	1.7875	0.00743196
34.11.13 gas and metabolite distribution	1	0.13	FGSG_04512	13	0.09	1.44444	0.50809
34.11.13.07 circulation (e.g. blood pressure)	1	0.13	FGSG_04512	12	0.08	1.625	0.480486
32.05 disease, virulence and defense	40	5.44	FGSG_00046 FGSG_00139 FGSG_00423 FGSG_01836 FGSG_02343 FGSG_02672 FGSG_04580 FGSG_04529 FGSG_03688 FGSG_03542 FGSG_03541 FGSG_03504 FGSG_03340 FGSG_03151 FGSG_03033 FGSG_03032 FGSG_12548 FGSG_16327 FGSG_16401 FGSG_04717 FGSG_04828 FGSG_05159 FGSG_12704 FGSG_16423 FGSG_16437 FGSG_07136 FGSG_07360 FGSG_13166 FGSG_13185 FGSG_16853 FGSG_17091 FGSG_17122 FGSG_13487 FGSG_09099 FGSG_09595 FGSG_17488 FGS…	507	3.66	1.48634	0.00788078
02.16.01 alcohol fermentation	8	1.08	FGSG_00139 FGSG_02165 FGSG_12365 FGSG_12368 FGSG_03431 FGSG_16351 FGSG_08054 FGSG_09364	56	0.4	2.7	0.00901175
32 CELL RESCUE, DEFENSE AND VIRULENCE	97	13.2	FGSG_00046 FGSG_00139 FGSG_00140 FGSG_00172 FGSG_00226 FGSG_00361 FGSG_00423 FGSG_11814 FGSG_00844 FGSG_01614 FGSG_01621 FGSG_01836 FGSG_01929 FGSG_02343 FGSG_02449 FGSG_02672 FGSG_02727 FGSG_15791 FGSG_15955 FGSG_11554 FGSG_04580 FGSG_04529 FGSG_12368 FGSG_03744 FGSG_03688 FGSG_03687 FGSG_03542 FGSG_03541 FGSG_03504 FGSG_03340 FGSG_03173 FGSG_03151 FGSG_03033 FGSG_03032 FGSG_12548 FGSG_02863 FGS…	1452	10.5	1.25714	0.00963748
40 CELL FATE	20	2.72	FGSG_00140 FGSG_00172 FGSG_00340 FGSG_00551 FGSG_01312 FGSG_02346 FGSG_02449 FGSG_11614 FGSG_03443 FGSG_02972 FGSG_02863 FGSG_05006 FGSG_05013 FGSG_05184 FGSG_05592 FGSG_08623 FGSG_09509 FGSG_09720 FGSG_17249 FGSG_11407	548	3.96	0.686869	1
40.01 cell growth / morphogenesis	11	1.49	FGSG_00140 FGSG_00340 FGSG_01312 FGSG_02346 FGSG_02449 FGSG_03443 FGSG_02972 FGSG_05006 FGSG_05592 FGSG_08623 FGSG_17249	383	2.77	0.537906	1
40.01.03 directional cell growth (morphogenesis)	5	0.68	FGSG_00140 FGSG_01312 FGSG_02449 FGSG_02972 FGSG_17249	141	1.01	0.673267	1
40.01.03.03 guidance of longitudinal cell extension (e.g. pollen tube guidance, axonal pathfinding)	1	0.13	FGSG_00140	65	0.47	0.276596	1
40.01.05 growth regulators / regulation of cell size	2	0.27	FGSG_02346 FGSG_03443	36	0.26	1.03846	0.576773
40.10 cell death	7	0.95	FGSG_00172 FGSG_00551 FGSG_11614 FGSG_02863 FGSG_05013 FGSG_09720 FGSG_11407	163	1.17	0.811966	1
40.10.02 apoptosis (type I programmed cell death)	6	0.81	FGSG_00172 FGSG_11614 FGSG_02863 FGSG_05013 FGSG_09720 FGSG_11407	150	1.08	0.75	1
40.10.02.01 anti-apoptosis	1	0.13	FGSG_05013	31	0.22	0.590909	1
40.10.02.02 apoptotic program	3	0.4	FGSG_02863 FGSG_09720 FGSG_11407	27	0.19	2.10526	0.170558
40.10.02.02.01 apoptotic mitochondrial changes	3	0.4	FGSG_02863 FGSG_09720 FGSG_11407	10	0.07	5.71429	0.0135051
40.10.02.03 induction of apoptosis	3	0.4	FGSG_02863 FGSG_09720 FGSG_11407	32	0.23	1.73913	0.240081
40.20 cell aging	2	0.27	FGSG_05184 FGSG_09509	35	0.25	1.08	0.561314
41 DEVELOPMENT (Systemic)	4	0.54	FGSG_00774 FGSG_16572 FGSG_07944 FGSG_17598	98	0.7	0.771429	1
41.01 fungal/microorganismic development	4	0.54	FGSG_00774 FGSG_16572 FGSG_07944 FGSG_17598	98	0.7	0.771429	1
41.01.01 mating (fertilization)	2	0.27	FGSG_16572 FGSG_07944	42	0.3	0.9	1
41.01.03 tissue pattern formation	2	0.27	FGSG_00774 FGSG_17598	17	0.12	2.25	0.227311
41.01.03.01 fruit body development (sexually or asexually derived spores)	2	0.27	FGSG_00774 FGSG_17598	15	0.1	2.7	0.187701
42 BIOGENESIS OF CELLULAR COMPONENTS	42	5.72	FGSG_00139 FGSG_00140 FGSG_00361 FGSG_00551 FGSG_00672 FGSG_11814 FGSG_00844 FGSG_00960 FGSG_01312 FGSG_01510 FGSG_01545 FGSG_01836 FGSG_02165 FGSG_02641 FGSG_02751 FGSG_03984 FGSG_03798 FGSG_03072 FGSG_04890 FGSG_05013 FGSG_12694 FGSG_05591 FGSG_05644 FGSG_06016 FGSG_06149 FGSG_16572 FGSG_06867 FGSG_07371 FGSG_07944 FGSG_08781 FGSG_08623 FGSG_17091 FGSG_13640 FGSG_17249 FGSG_10307 FGSG_17383 FGS…	1165	8.42	0.679335	1
42.01 cell wall	11	1.49	FGSG_00960 FGSG_02165 FGSG_02641 FGSG_05591 FGSG_07944 FGSG_08781 FGSG_08623 FGSG_17249 FGSG_17540 FGSG_17624 FGSG_17655	276	1.99	0.748744	1
42.02 eukaryotic plasma membrane	3	0.4	FGSG_01836 FGSG_02751 FGSG_06016	25	0.18	2.22222	0.144622
42.03 cytoplasm	1	0.13	FGSG_06149	3	0.02	6.5	0.15097
42.04 cytoskeleton/structural proteins	8	1.08	FGSG_00140 FGSG_01312 FGSG_04890 FGSG_05644 FGSG_06016 FGSG_06149 FGSG_07371 FGSG_17249	303	2.19	0.493151	1
42.04.03 actin cytoskeleton	1	0.13	FGSG_06016	111	0.8	0.1625	1
42.04.05 microtubule cytoskeleton	4	0.54	FGSG_04890 FGSG_05644 FGSG_06149 FGSG_07371	78	0.56	0.964286	1
42.05 centrosome	1	0.13	FGSG_00672	9	0.06	2.16667	0.388042
42.10 nucleus	11	1.49	FGSG_00361 FGSG_00551 FGSG_11814 FGSG_00844 FGSG_01510 FGSG_01545 FGSG_05013 FGSG_16572 FGSG_06867 FGSG_13640 FGSG_10307	300	2.16	0.689815	1
42.10.03 organization of chromosome structure	9	1.22	FGSG_00361 FGSG_00551 FGSG_11814 FGSG_00844 FGSG_01510 FGSG_05013 FGSG_16572 FGSG_06867 FGSG_10307	260	1.88	0.648936	1
42.16 mitochondrion	6	0.81	FGSG_00139 FGSG_03984 FGSG_12694 FGSG_17383 FGSG_11457 FGSG_11291	180	1.3	0.623077	1
42.19 peroxisome	1	0.13	FGSG_03798	34	0.24	0.541667	1
42.25 vacuole or lysosome	1	0.13	FGSG_03072	57	0.41	0.317073	1
42.27 extracellular / secretion proteins	1	0.13	FGSG_17091	20	0.14	0.928571	1
42.29 bud / growth tip	1	0.13	FGSG_11025	31	0.22	0.590909	1
43 CELL TYPE DIFFERENTIATION	27	3.67	FGSG_04529 FGSG_03688 FGSG_03504 FGSG_03460 FGSG_03337 FGSG_03151 FGSG_16391 FGSG_05006 FGSG_16423 FGSG_07136 FGSG_07227 FGSG_07422 FGSG_07783 FGSG_16853 FGSG_08781 FGSG_08623 FGSG_13487 FGSG_17249 FGSG_10043 FGSG_10289 FGSG_17315 FGSG_10728 FGSG_17488 FGSG_11405 FGSG_11385 FGSG_17624 FGSG_17655	649	4.69	0.782516	1
43.01 fungal/microorganismic cell type differentiation	27	3.67	FGSG_04529 FGSG_03688 FGSG_03504 FGSG_03460 FGSG_03337 FGSG_03151 FGSG_16391 FGSG_05006 FGSG_16423 FGSG_07136 FGSG_07227 FGSG_07422 FGSG_07783 FGSG_16853 FGSG_08781 FGSG_08623 FGSG_13487 FGSG_17249 FGSG_10043 FGSG_10289 FGSG_17315 FGSG_10728 FGSG_17488 FGSG_11405 FGSG_11385 FGSG_17624 FGSG_17655	649	4.69	0.782516	1
43.01.03 fungal and other eukaryotic cell type differentiation	27	3.67	FGSG_04529 FGSG_03688 FGSG_03504 FGSG_03460 FGSG_03337 FGSG_03151 FGSG_16391 FGSG_05006 FGSG_16423 FGSG_07136 FGSG_07227 FGSG_07422 FGSG_07783 FGSG_16853 FGSG_08781 FGSG_08623 FGSG_13487 FGSG_17249 FGSG_10043 FGSG_10289 FGSG_17315 FGSG_10728 FGSG_17488 FGSG_11405 FGSG_11385 FGSG_17624 FGSG_17655	649	4.69	0.782516	1
43.01.03.05 budding, cell polarity and filament formation	4	0.54	FGSG_05006 FGSG_07422 FGSG_07783 FGSG_17249	293	2.11	0.255924	1
43.01.03.06 hyphae formation	3	0.4	FGSG_08781 FGSG_17624 FGSG_17655	23	0.16	2.5	0.120148
43.01.03.09 development of asco- basidio- or zygospore	10	1.36	FGSG_03460 FGSG_16391 FGSG_07227 FGSG_08781 FGSG_08623 FGSG_10043 FGSG_17315 FGSG_10728 FGSG_11405 FGSG_17624	196	1.41	0.964539	1
99 UNCLASSIFIED PROTEINS	353	48	FGSG_00043 FGSG_00044 FGSG_00064 FGSG_00072 FGSG_00129 FGSG_11686 FGSG_00235 FGSG_00246 FGSG_11732 FGSG_00307 FGSG_00344 FGSG_00394 FGSG_11768 FGSG_00483 FGSG_11773 FGSG_11786 FGSG_00582 FGSG_00606 FGSG_00683 FGSG_00696 FGSG_11817 FGSG_00788 FGSG_11838 FGSG_00896 FGSG_01003 FGSG_01012 FGSG_01108 FGSG_01149 FGSG_01159 FGSG_11928 FGSG_01335 FGSG_01467 FGSG_01521 FGSG_01539 FGSG_01595 FGSG_01616 FGS…	7238	52.3	0.917782	0.992028

## Sheet: Sapro_Axo_334 genes
FUNCTIONAL CATEGORY	abs SET	rel SET	genes SET	abs GENOME	rel GENOME	rel SET/rel GENOME	P-VALUE
01 METABOLISM	50	14.9	FGSG_00051 FGSG_00895 FGSG_01650 FGSG_01868 FGSG_02117 FGSG_02259 FGSG_15970 FGSG_12211 FGSG_04216 FGSG_03703 FGSG_03686 FGSG_03579 FGSG_03557 FGSG_03363 FGSG_03243 FGSG_03174 FGSG_03147 FGSG_02941 FGSG_16190 FGSG_16299 FGSG_16353 FGSG_05272 FGSG_05450 FGSG_06550 FGSG_12996 FGSG_07683 FGSG_07846 FGSG_07887 FGSG_07916 FGSG_16665 FGSG_08909 FGSG_08816 FGSG_08610 FGSG_08469 FGSG_17010 FGSG_17085 FGS…	3402	24.6	0.605691	0.999995
01.01 amino acid metabolism	8	2.39	FGSG_03174 FGSG_03147 FGSG_05272 FGSG_07916 FGSG_08909 FGSG_08469 FGSG_17010 FGSG_17085	649	4.69	0.509595	1
01.01.03 assimilation of ammonia, metabolism of the glutamate group	3	0.89	FGSG_07916 FGSG_17010 FGSG_17085	127	0.91	0.978022	1
01.01.03.02 metabolism of glutamate	1	0.29	FGSG_17085	63	0.45	0.644444	1
01.01.03.02.01 biosynthesis of glutamate	1	0.29	FGSG_17085	41	0.29	1	0.63362
01.01.03.05 metabolism of arginine	3	0.89	FGSG_07916 FGSG_17010 FGSG_17085	48	0.34	2.61765	0.109353
01.01.03.05.01 biosynthesis of arginine	2	0.59	FGSG_07916 FGSG_17085	27	0.19	3.10526	0.137785
01.01.05 metabolism of urea cycle, creatine and polyamines	1	0.29	FGSG_05272	45	0.32	0.90625	1
01.01.05.01 metabolism of polyamines	1	0.29	FGSG_05272	17	0.12	2.41667	0.340294
01.01.05.01.02 degradation of polyamines	1	0.29	FGSG_05272	10	0.07	4.14286	0.216998
01.01.06 metabolism of the aspartate family	5	1.49	FGSG_03174 FGSG_03147 FGSG_07916 FGSG_08909 FGSG_17010	137	0.99	1.50505	0.236934
01.01.06.04 metabolism of threonine	2	0.59	FGSG_03147 FGSG_08909	18	0.13	4.53846	0.0690354
99 UNCLASSIFIED PROTEINS	251	75.1	FGSG_11690 FGSG_00163 FGSG_00262 FGSG_11747 FGSG_11749 FGSG_00351 FGSG_15067 FGSG_00456 FGSG_11770 FGSG_00513 FGSG_00521 FGSG_11778 FGSG_15073 FGSG_15081 FGSG_11840 FGSG_15086 FGSG_15087 FGSG_15089 FGSG_01114 FGSG_15117 FGSG_11918 FGSG_01537 FGSG_01538 FGSG_01651 FGSG_01668 FGSG_01760 FGSG_12020 FGSG_01859 FGSG_12027 FGSG_01982 FGSG_12053 FGSG_15059 FGSG_15060 FGSG_02037 FGSG_02050 FGSG_15138 FGS…	7238	52.3	1.43595	3.79719e-18
01.01.06.04.01 biosynthesis of threonine	2	0.59	FGSG_03147 FGSG_08909	8	0.05	11.8	0.0147958
01.01.06.05 metabolism of methionine	1	0.29	FGSG_08909	44	0.31	0.935484	1
01.01.06.05.02 degradation of methionine	1	0.29	FGSG_08909	7	0.05	5.8	0.15736
01.01.06.06 metabolism of lysine	3	0.89	FGSG_03174 FGSG_07916 FGSG_17010	55	0.39	2.28205	0.147265
01.01.06.06.01 biosynthesis of lysine	2	0.59	FGSG_03174 FGSG_07916	32	0.23	2.56522	0.180425
01.01.06.06.01.01 diaminopimelic acid pathway	1	0.29	FGSG_07916	15	0.1	2.9	0.307189
01.01.06.06.01.03 aminoadipic acid pathway	1	0.29	FGSG_03174	14	0.1	2.9	0.29002
01.01.09 metabolism of the cysteine - aromatic group	3	0.89	FGSG_03147 FGSG_08909 FGSG_17010	266	1.92	0.463542	1
01.01.09.01 metabolism of glycine	2	0.59	FGSG_03147 FGSG_08909	48	0.34	1.73529	0.323492
01.01.09.01.01 biosynthesis of glycine	1	0.29	FGSG_03147	36	0.26	1.11538	0.585827
01.01.09.01.02 degradation of glycine	2	0.59	FGSG_03147 FGSG_08909	17	0.12	4.91667	0.0623324
01.01.09.02 metabolism of serine	2	0.59	FGSG_03147 FGSG_08909	48	0.34	1.73529	0.323492
01.01.09.02.01 biosynthesis of serine	2	0.59	FGSG_03147 FGSG_08909	26	0.18	3.27778	0.12955
01.01.06.04.02 degradation of threonine	2	0.59	FGSG_03147 FGSG_08909	12	0.08	7.375	0.0327274
01.01.09.03 metabolism of cysteine	1	0.29	FGSG_08909	30	0.21	1.38095	0.520206
01.01.09.07 metabolism of histidine	1	0.29	FGSG_17010	24	0.17	1.70588	0.444224
01.01.11 metabolism of the pyruvate family (alanine, isoleucine, leucine, valine) and D-alanine	2	0.59	FGSG_03174 FGSG_03147	65	0.47	1.25532	0.468101
01.01.11.04 metabolism of leucine	1	0.29	FGSG_03174	31	0.22	1.31818	0.531822
01.01.11.04.01 biosynthesis of leucine	1	0.29	FGSG_03174	21	0.15	1.93333	0.401848
01.01.09.02.02 degradation of serine	2	0.59	FGSG_03147 FGSG_08909	12	0.08	7.375	0.0327274
01.01.13 regulation of amino acid metabolism	1	0.29	FGSG_08469	68	0.49	0.591837	1
01.02 nitrogen, sulfur and selenium metabolism	6	1.79	FGSG_00051 FGSG_12211 FGSG_02941 FGSG_08909 FGSG_17085 FGSG_09102	336	2.43	0.736626	1
01.02.02 nitrogen metabolism	2	0.59	FGSG_00051 FGSG_09102	63	0.45	1.31111	0.451984
01.02.02.06 assimilation of ammonia	1	0.29	FGSG_09102	9	0.06	4.83333	0.197602
01.02.02.09 catabolism of nitrogenous compounds	1	0.29	FGSG_00051	28	0.2	1.45	0.496106
01.02.07 regulation of nitrogen, sulfur and selenium metabolism	1	0.29	FGSG_12211	87	0.62	0.467742	1
01.02.07.01 regulation of nitrogen metabolism	1	0.29	FGSG_12211	37	0.26	1.11538	0.595859
01.03 nucleotide/nucleoside/nucleobase metabolism	2	0.59	FGSG_02259 FGSG_02941	407	2.94	0.20068	1
01.03.01 purin nucleotide/nucleoside/nucleobase metabolism	2	0.59	FGSG_02259 FGSG_02941	149	1.07	0.551402	1
01.03.01.01 purine nucleotide /nucleoside/nucleobase catabolism	1	0.29	FGSG_02259	12	0.08	3.625	0.2544
01.03.04 pyrimidine nucleotide/nucleoside/nucleobase metabolism	1	0.29	FGSG_02259	81	0.58	0.5	1
01.03.10 metabolism of cyclic and unusual nucleotides	1	0.29	FGSG_02259	23	0.16	1.8125	0.430442
01.04 phosphate metabolism	5	1.49	FGSG_02259 FGSG_16299 FGSG_08469 FGSG_09707 FGSG_10174	601	4.34	0.343318	1
01.04.04 regulation of phosphate metabolism	1	0.29	FGSG_08469	33	0.23	1.26087	0.554219
01.05 C-compound and carbohydrate metabolism	26	7.78	FGSG_00895 FGSG_01650 FGSG_15970 FGSG_03703 FGSG_03579 FGSG_03557 FGSG_03243 FGSG_03174 FGSG_02941 FGSG_16353 FGSG_05272 FGSG_05450 FGSG_06550 FGSG_07683 FGSG_07846 FGSG_16665 FGSG_08816 FGSG_08610 FGSG_09054 FGSG_11191 FGSG_11032 FGSG_13875 FGSG_10999 FGSG_11498 FGSG_14003 FGSG_17664	1547	11.1	0.700901	1
01.05.02 sugar, glucoside, polyol and carboxylate metabolism	5	1.49	FGSG_01650 FGSG_03703 FGSG_16353 FGSG_07683 FGSG_10999	307	2.22	0.671171	1
01.05.02.04 sugar, glucoside, polyol and carboxylate anabolism	2	0.59	FGSG_16353 FGSG_07683	85	0.61	0.967213	1
01.05.02.07 sugar, glucoside, polyol and carboxylate catabolism	4	1.19	FGSG_03703 FGSG_16353 FGSG_07683 FGSG_10999	224	1.62	0.734568	1
01.05.03 polysaccharide metabolism	2	0.59	FGSG_06550 FGSG_11191	291	2.1	0.280952	1
01.05.03.03 chitin metabolism	1	0.29	FGSG_06550	31	0.22	1.31818	0.531822
01.05.03.03.04 chitin anabolism	1	0.29	FGSG_06550	17	0.12	2.41667	0.340294
01.05.09 aminosaccharide metabolism	1	0.29	FGSG_06550	66	0.47	0.617021	1
01.05.09.04 aminosaccharide anabolism	1	0.29	FGSG_06550	39	0.28	1.03571	0.615201
01.05.13 transfer of activated C-1 groups	1	0.29	FGSG_15970	84	0.6	0.483333	1
01.05.13.01 S-adenosyl-methionine - homocysteine cycle	1	0.29	FGSG_15970	33	0.23	1.26087	0.554219
01.05.25 regulation of C-compound and carbohydrate metabolism	2	0.59	FGSG_14003 FGSG_17664	208	1.5	0.393333	1
01.06 lipid, fatty acid and isoprenoid metabolism	14	4.19	FGSG_01868 FGSG_02117 FGSG_04216 FGSG_03686 FGSG_03579 FGSG_03363 FGSG_03243 FGSG_16190 FGSG_16353 FGSG_07887 FGSG_08816 FGSG_09154 FGSG_17329 FGSG_11032	850	6.14	0.68241	1
01.06.05 fatty acid metabolism	3	0.89	FGSG_03686 FGSG_03579 FGSG_08816	157	1.13	0.787611	1
01.06.06 isoprenoid metabolism	5	1.49	FGSG_01868 FGSG_02117 FGSG_03686 FGSG_16190 FGSG_07887	184	1.33	1.1203	0.458999
01.06.06.07 diterpenes metabolism	2	0.59	FGSG_01868 FGSG_02117	12	0.08	7.375	0.0327274
01.06.06.11 tetracyclic and pentacyclic triterpenes (cholesterin, steroids and hopanoids) metabolism	4	1.19	FGSG_01868 FGSG_03686 FGSG_16190 FGSG_07887	136	0.98	1.21429	0.41749
01.06.10 regulation of lipid, fatty acid and isoprenoid metabolism	1	0.29	FGSG_03363	39	0.28	1.03571	0.615201
01.07 metabolism of vitamins, cofactors, and prosthetic groups	5	1.49	FGSG_01868 FGSG_07846 FGSG_17085 FGSG_09054 FGSG_13875	346	2.5	0.596	1
01.07.01 biosynthesis of vitamins, cofactors, and prosthetic groups	1	0.29	FGSG_17085	179	1.29	0.224806	1
01.20 secondary metabolism	9	2.69	FGSG_00895 FGSG_01868 FGSG_02117 FGSG_04216 FGSG_03147 FGSG_05272 FGSG_12996 FGSG_08816 FGSG_13870	627	4.53	0.593819	1
01.20.05 metabolism of acetic acid derivatives	2	0.59	FGSG_04216 FGSG_08816	56	0.4	1.475	0.39351
01.20.05.09 metabolism of eicosanoids	1	0.29	FGSG_08816	17	0.12	2.41667	0.340294
01.20.05.11 metabolism of polyketides	1	0.29	FGSG_04216	26	0.18	1.61111	0.470798
01.20.17 metabolism of secondary products derived from primary amino acids	2	0.59	FGSG_00895 FGSG_05272	96	0.69	0.855072	1
01.20.17.03 metabolism of amines	1	0.29	FGSG_05272	35	0.25	1.16	0.575548
01.20.17.09 metabolism of alkaloids	1	0.29	FGSG_00895	31	0.22	1.31818	0.531822
01.01.11.07 metabolism of the hydroxyamino acid group	1	0.29	FGSG_03147	2	0.01	29	0.0477329
01.20.31 metabolism of secondary products derived from L-lysine, L-arginine and L-histidine	1	0.29	FGSG_12996	15	0.1	2.9	0.307189
01.20.37 metabolism of peptide derived compounds	1	0.29	FGSG_13870	60	0.43	0.674419	1
01.20.37.05 metabolism of beta-lactams	1	0.29	FGSG_13870	19	0.13	2.23077	0.371822
02 ENERGY	5	1.49	FGSG_03703 FGSG_03557 FGSG_05450 FGSG_07683 FGSG_16665	609	4.4	0.338636	1
02.01 glycolysis and gluconeogenesis	1	0.29	FGSG_05450	112	0.81	0.358025	1
02.08 pyruvate dehydrogenase complex	1	0.29	FGSG_05450	9	0.06	4.83333	0.197602
02.10 tricarboxylic-acid pathway (citrate cycle, Krebs cycle, TCA cycle)	1	0.29	FGSG_05450	54	0.39	0.74359	1
02.11 electron transport and membrane-associated energy conservation	1	0.29	FGSG_03557	166	1.2	0.241667	1
02.11.07 regulation of electron transport and membrane-associated energy conservation	1	0.29	FGSG_03557	11	0.07	4.14286	0.235927
02.16 fermentation	2	0.59	FGSG_05450 FGSG_07683	109	0.78	0.75641	1
01.20.27 metabolism of secondary products derived from L-aspartic acid and L-threonine	1	0.29	FGSG_03147	2	0.01	29	0.0477329
02.16.05 butyrate and butanol-acetoine fermentation	1	0.29	FGSG_05450	2	0.01	29	0.0477329
02.19 metabolism of energy reserves (e.g. glycogen, trehalose)	2	0.59	FGSG_03703 FGSG_16665	52	0.37	1.59459	0.358848
10 CELL CYCLE AND DNA PROCESSING	11	3.29	FGSG_15808 FGSG_15970 FGSG_16299 FGSG_05214 FGSG_05450 FGSG_06550 FGSG_08816 FGSG_17010 FGSG_10174 FGSG_17551 FGSG_11383	1080	7.81	0.421255	1
10.01 DNA processing	5	1.49	FGSG_15808 FGSG_15970 FGSG_05214 FGSG_10174 FGSG_17551	595	4.3	0.346512	1
10.01.05 DNA recombination and DNA repair	3	0.89	FGSG_15808 FGSG_05214 FGSG_17551	309	2.23	0.399103	1
10.01.05.01 DNA repair	3	0.89	FGSG_15808 FGSG_05214 FGSG_17551	267	1.93	0.46114	1
10.01.05.03 DNA recombination	1	0.29	FGSG_15808	113	0.81	0.358025	1
10.01.09 DNA restriction or modification	3	0.89	FGSG_15808 FGSG_15970 FGSG_10174	282	2.03	0.438424	1
10.01.09.05 DNA conformation modification (e.g. chromatin)	3	0.89	FGSG_15808 FGSG_15970 FGSG_10174	274	1.98	0.449495	1
10.03 cell cycle	7	2.09	FGSG_16299 FGSG_05214 FGSG_05450 FGSG_06550 FGSG_08816 FGSG_17010 FGSG_11383	705	5.09	0.410609	1
10.03.01 mitotic cell cycle and cell cycle control	5	1.49	FGSG_16299 FGSG_05214 FGSG_05450 FGSG_08816 FGSG_17010	507	3.66	0.407104	1
10.03.01.01 mitotic cell cycle	2	0.59	FGSG_16299 FGSG_05450	203	1.46	0.40411	1
10.03.01.01.03 G1/S transition of mitotic cell cycle	2	0.59	FGSG_16299 FGSG_05450	46	0.33	1.78788	0.305622
10.03.01.01.09 G2/M transition of mitotic cell cycle	1	0.29	FGSG_16299	43	0.31	0.935484	1
10.03.01.03 cell cycle checkpoints (checkpoints of morphogenesis, DNA-damage,-replication, mitotic phase and spindle)	1	0.29	FGSG_05214	76	0.54	0.537037	1
10.03.03 cytokinesis (cell division) /septum formation and hydrolysis	1	0.29	FGSG_06550	169	1.22	0.237705	1
10.03.04 nuclear and chromosomal cycle	1	0.29	FGSG_11383	105	0.75	0.386667	1
10.03.04.01 centromere/kinetochore complex maturation	1	0.29	FGSG_11383	8	0.05	5.8	0.177726
11 TRANSCRIPTION	10	2.99	FGSG_15808 FGSG_12211 FGSG_03246 FGSG_16299 FGSG_16435 FGSG_07887 FGSG_09102 FGSG_10174 FGSG_14003 FGSG_17664	1225	8.86	0.337472	1
11.02 RNA synthesis	9	2.69	FGSG_15808 FGSG_12211 FGSG_03246 FGSG_16299 FGSG_16435 FGSG_09102 FGSG_10174 FGSG_14003 FGSG_17664	960	6.94	0.387608	1
11.02.01 rRNA synthesis	1	0.29	FGSG_16299	71	0.51	0.568627	1
11.02.02 tRNA synthesis	1	0.29	FGSG_16299	55	0.39	0.74359	1
11.02.03 mRNA synthesis	8	2.39	FGSG_15808 FGSG_12211 FGSG_03246 FGSG_16435 FGSG_09102 FGSG_10174 FGSG_14003 FGSG_17664	880	6.36	0.375786	1
11.02.03.01 general transcription activities	2	0.59	FGSG_16435 FGSG_10174	192	1.38	0.427536	1
11.02.03.01.01 transcription initiation	1	0.29	FGSG_16435	48	0.34	0.852941	1
11.02.03.01.04 transcription elongation	1	0.29	FGSG_10174	27	0.19	1.52632	0.483607
11.02.03.04 transcriptional control	8	2.39	FGSG_15808 FGSG_12211 FGSG_03246 FGSG_16435 FGSG_09102 FGSG_10174 FGSG_14003 FGSG_17664	765	5.53	0.432188	1
11.02.03.04.01 transcription activation	6	1.79	FGSG_03246 FGSG_16435 FGSG_09102 FGSG_10174 FGSG_14003 FGSG_17664	189	1.36	1.31618	0.306859
11.02.03.04.03 transcription repression	2	0.59	FGSG_12211 FGSG_16435	111	0.8	0.7375	1
11.04 RNA processing	1	0.29	FGSG_07887	442	3.19	0.0909091	1
11.04.03 mRNA processing (splicing, 5^-, 3^-end processing)	1	0.29	FGSG_07887	277	2	0.145	1
11.04.03.01 splicing	1	0.29	FGSG_07887	214	1.54	0.188312	1
12 PROTEIN SYNTHESIS	1	0.29	FGSG_08469	439	3.17	0.0914826	1
12.07 translational control	1	0.29	FGSG_08469	84	0.6	0.483333	1
14 PROTEIN FATE (folding, modification, destination)	14	4.19	FGSG_00965 FGSG_01650 FGSG_02645 FGSG_15753 FGSG_15970 FGSG_03363 FGSG_16089 FGSG_16299 FGSG_16435 FGSG_12996 FGSG_07358 FGSG_07887 FGSG_08469 FGSG_09115	1451	10.4	0.402885	1
14.01 protein folding and stabilization	1	0.29	FGSG_12996	137	0.99	0.292929	1
14.07 protein modification	9	2.69	FGSG_00965 FGSG_15753 FGSG_15970 FGSG_03363 FGSG_16299 FGSG_12996 FGSG_07358 FGSG_08469 FGSG_09115	851	6.15	0.437398	1
14.07.01 modification with fatty acids (e.g. myristylation, palmitylation, farnesylation)	1	0.29	FGSG_03363	46	0.33	0.878788	1
14.07.03 modification by phosphorylation, dephosphorylation, autophosphorylation	2	0.59	FGSG_16299 FGSG_08469	251	1.81	0.325967	1
14.07.05 modification by ubiquitination, deubiquitination	2	0.59	FGSG_15970 FGSG_08469	139	1	0.59	1
14.07.07 modification by ubiquitin-related proteins	1	0.29	FGSG_16299	45	0.32	0.90625	1
14.07.09 posttranslational modification of amino acids (e.g. hydroxylation, methylation)	3	0.89	FGSG_00965 FGSG_15970 FGSG_12996	57	0.41	2.17073	0.158794
14.07.11 protein processing (proteolytic)	2	0.59	FGSG_07358 FGSG_09115	148	1.07	0.551402	1
14.13 protein/peptide degradation	9	2.69	FGSG_01650 FGSG_02645 FGSG_15970 FGSG_16089 FGSG_16435 FGSG_07358 FGSG_07887 FGSG_08469 FGSG_09115	443	3.2	0.840625	1
14.13.01 cytoplasmic and nuclear protein degradation	5	1.49	FGSG_01650 FGSG_02645 FGSG_15970 FGSG_07887 FGSG_08469	298	2.15	0.693023	1
14.13.01.01 proteasomal degradation (ubiquitin/proteasomal pathway)	3	0.89	FGSG_01650 FGSG_15970 FGSG_08469	173	1.25	0.712	1
16 PROTEIN WITH BINDING FUNCTION OR COFACTOR REQUIREMENT (structural or catalytic)	38	11.3	FGSG_00895 FGSG_00965 FGSG_01650 FGSG_01868 FGSG_02117 FGSG_02645 FGSG_15808 FGSG_15970 FGSG_03686 FGSG_03579 FGSG_03557 FGSG_03246 FGSG_03174 FGSG_03147 FGSG_02941 FGSG_16190 FGSG_16224 FGSG_16299 FGSG_05214 FGSG_05272 FGSG_16435 FGSG_07358 FGSG_07683 FGSG_07846 FGSG_07887 FGSG_07916 FGSG_08816 FGSG_08469 FGSG_17010 FGSG_17085 FGSG_09054 FGSG_09707 FGSG_10174 FGSG_10493 FGSG_10655 FGSG_13875 FGS…	3139	22.7	0.497797	1
16.01 protein binding	15	4.49	FGSG_00965 FGSG_01650 FGSG_15808 FGSG_15970 FGSG_16224 FGSG_16299 FGSG_05214 FGSG_16435 FGSG_07358 FGSG_07887 FGSG_08816 FGSG_08469 FGSG_10174 FGSG_10493 FGSG_17551	1601	11.5	0.390435	1
16.03 nucleic acid binding	6	1.79	FGSG_15808 FGSG_03246 FGSG_07887 FGSG_10174 FGSG_14003 FGSG_17551	811	5.86	0.305461	1
16.03.01 DNA binding	5	1.49	FGSG_15808 FGSG_03246 FGSG_10174 FGSG_14003 FGSG_17551	471	3.4	0.438235	1
16.03.03 RNA binding	1	0.29	FGSG_07887	327	2.36	0.122881	1
16.17 metal binding	11	3.29	FGSG_01650 FGSG_02645 FGSG_15970 FGSG_03686 FGSG_03557 FGSG_02941 FGSG_16190 FGSG_07358 FGSG_07683 FGSG_07916 FGSG_10655	758	5.48	0.600365	1
16.17.01 calcium binding	1	0.29	FGSG_02645	99	0.71	0.408451	1
16.17.09 heavy metal binding (Cu, Fe, Zn)	9	2.69	FGSG_01650 FGSG_15970 FGSG_03686 FGSG_03557 FGSG_02941 FGSG_16190 FGSG_07683 FGSG_07916 FGSG_10655	499	3.6	0.747222	1
16.19 nucleotide/nucleoside/nucleobase binding	9	2.69	FGSG_15808 FGSG_15970 FGSG_16299 FGSG_16435 FGSG_08469 FGSG_17010 FGSG_09707 FGSG_10174 FGSG_17551	868	6.27	0.429027	1
16.19.03 ATP binding	9	2.69	FGSG_15808 FGSG_15970 FGSG_16299 FGSG_16435 FGSG_08469 FGSG_17010 FGSG_09707 FGSG_10174 FGSG_17551	660	4.77	0.563941	1
16.21 complex cofactor/cosubstrate/vitamine binding	16	4.79	FGSG_00895 FGSG_01868 FGSG_02117 FGSG_03686 FGSG_03579 FGSG_03557 FGSG_03174 FGSG_03147 FGSG_16190 FGSG_05272 FGSG_07683 FGSG_07846 FGSG_08816 FGSG_17085 FGSG_09054 FGSG_13875	514	3.71	1.29111	0.180794
16.21.01 heme binding	4	1.19	FGSG_01868 FGSG_02117 FGSG_03686 FGSG_16190	91	0.65	1.83077	0.177829
16.21.05 FAD/FMN binding	5	1.49	FGSG_00895 FGSG_05272 FGSG_07846 FGSG_09054 FGSG_13875	151	1.09	1.36697	0.301471
16.21.07 NAD/NADP binding	8	2.39	FGSG_03579 FGSG_03557 FGSG_03174 FGSG_07683 FGSG_07846 FGSG_08816 FGSG_09054 FGSG_13875	231	1.67	1.43114	0.196787
16.21.17 pyridoxal phosphate binding	2	0.59	FGSG_03147 FGSG_17085	63	0.45	1.31111	0.451984
18 REGULATION OF METABOLISM AND PROTEIN FUNCTION	3	0.89	FGSG_15753 FGSG_16299 FGSG_16435	512	3.7	0.240541	1
18.01 regulation by	1	0.29	FGSG_16299	250	1.8	0.161111	1
18.01.01 regulation by modification	1	0.29	FGSG_16299	143	1.03	0.281553	1
18.02 regulation of protein activity	3	0.89	FGSG_15753 FGSG_16299 FGSG_16435	502	3.63	0.245179	1
18.02.01 enzymatic activity regulation / enzyme regulator	3	0.89	FGSG_15753 FGSG_16299 FGSG_16435	313	2.26	0.393805	1
18.02.01.01 enzyme activator	2	0.59	FGSG_15753 FGSG_16435	142	1.02	0.578431	1
18.02.01.01.03 protease activator	1	0.29	FGSG_16435	12	0.08	3.625	0.2544
18.02.09 regulator of transcription factor	1	0.29	FGSG_16435	106	0.76	0.381579	1
20 CELLULAR TRANSPORT, TRANSPORT FACILITIES AND TRANSPORT ROUTES	21	6.28	FGSG_01868 FGSG_02117 FGSG_02119 FGSG_15992 FGSG_04188 FGSG_03686 FGSG_03557 FGSG_03447 FGSG_03363 FGSG_16190 FGSG_05272 FGSG_05368 FGSG_06656 FGSG_07846 FGSG_17010 FGSG_09054 FGSG_09707 FGSG_10655 FGSG_13875 FGSG_10919 FGSG_17674	2007	14.5	0.433103	0.999999
20.01 transported compounds (substrates)	20	5.98	FGSG_01868 FGSG_02117 FGSG_02119 FGSG_04188 FGSG_03686 FGSG_03557 FGSG_03447 FGSG_03363 FGSG_16190 FGSG_05272 FGSG_05368 FGSG_06656 FGSG_07846 FGSG_17010 FGSG_09054 FGSG_09707 FGSG_10655 FGSG_13875 FGSG_10919 FGSG_17674	1597	11.5	0.52	1
20.01.01 ion transport	1	0.29	FGSG_10655	321	2.32	0.125	1
20.01.01.01 cation transport (H+, Na+, K+, Ca2+ , NH4+, etc.)	1	0.29	FGSG_10655	269	1.94	0.149485	1
20.01.01.01.01 heavy metal ion transport (Cu+, Fe3+, etc.)	1	0.29	FGSG_10655	99	0.71	0.408451	1
20.01.01.01.01.01 siderophore-iron transport	1	0.29	FGSG_10655	41	0.29	1	0.63362
20.01.03 C-compound and carbohydrate transport	2	0.59	FGSG_05368 FGSG_09707	332	2.4	0.245833	1
20.01.07 amino acid/amino acid derivatives transport	1	0.29	FGSG_17010	120	0.86	0.337209	1
20.01.13 lipid/fatty acid transport	3	0.89	FGSG_02119 FGSG_03363 FGSG_06656	141	1.01	0.881188	1
20.01.15 electron transport	9	2.69	FGSG_01868 FGSG_02117 FGSG_03686 FGSG_03557 FGSG_16190 FGSG_05272 FGSG_07846 FGSG_09054 FGSG_13875	398	2.87	0.937282	1
20.01.23 allantoin and allantoate transport	2	0.59	FGSG_05368 FGSG_10919	75	0.54	1.09259	0.544247
20.01.25 vitamine/cofactor transport	2	0.59	FGSG_05368 FGSG_09707	97	0.7	0.842857	1
20.01.27 drug/toxin transport	4	1.19	FGSG_04188 FGSG_03447 FGSG_17010 FGSG_17674	171	1.23	0.96748	1
20.03 transport facilities	10	2.99	FGSG_02119 FGSG_15992 FGSG_04188 FGSG_03447 FGSG_05368 FGSG_06656 FGSG_17010 FGSG_09707 FGSG_10919 FGSG_17674	808	5.84	0.511986	1
20.03.02 carrier (electrochemical potential-driven transport)	1	0.29	FGSG_17010	142	1.02	0.284314	1
20.03.02.03 antiporter	1	0.29	FGSG_17010	75	0.54	0.537037	1
20.03.02.03.01 proton driven antiporter	1	0.29	FGSG_17010	45	0.32	0.90625	1
20.03.22 transport ATPases	3	0.89	FGSG_02119 FGSG_15992 FGSG_06656	123	0.88	1.01136	0.57402
20.03.25 ABC transporters	4	1.19	FGSG_04188 FGSG_03447 FGSG_09707 FGSG_17674	106	0.76	1.56579	0.253899
20.09 transport routes	9	2.69	FGSG_15992 FGSG_04188 FGSG_03447 FGSG_05368 FGSG_17010 FGSG_09707 FGSG_10655 FGSG_10919 FGSG_17674	1237	8.94	0.300895	1
20.09.13 vacuolar/lysosomal transport	1	0.29	FGSG_09707	170	1.22	0.237705	1
20.09.16 cellular export and secretion	5	1.49	FGSG_15992 FGSG_04188 FGSG_03447 FGSG_17010 FGSG_17674	268	1.93	0.772021	1
20.09.16.01 Type I protein secretion system (ABC-type transport systems)	2	0.59	FGSG_04188 FGSG_17674	39	0.28	2.10714	0.242643
20.09.18 cellular import	3	0.89	FGSG_05368 FGSG_10655 FGSG_10919	519	3.75	0.237333	1
20.09.18.07 non-vesicular cellular import	2	0.59	FGSG_05368 FGSG_10919	278	2.01	0.293532	1
30 CELLULAR COMMUNICATION/SIGNAL TRANSDUCTION MECHANISM	6	1.79	FGSG_02645 FGSG_03588 FGSG_16299 FGSG_08816 FGSG_10493 FGSG_17410	652	4.71	0.380042	1
30.01 cellular signalling	5	1.49	FGSG_02645 FGSG_03588 FGSG_16299 FGSG_10493 FGSG_17410	560	4.05	0.367901	1
30.01.05 enzyme mediated signal transduction	2	0.59	FGSG_16299 FGSG_10493	291	2.1	0.280952	1
30.01.05.01 protein kinase	1	0.29	FGSG_16299	138	0.99	0.292929	1
30.01.05.01.06 serine/threonine kinase	1	0.29	FGSG_16299	77	0.55	0.527273	1
30.01.05.05 G-protein mediated signal transduction	1	0.29	FGSG_10493	128	0.92	0.315217	1
30.05 transmembrane signal transduction	2	0.59	FGSG_16299 FGSG_08816	191	1.38	0.427536	1
30.05.01 receptor enzyme mediated signalling	1	0.29	FGSG_08816	71	0.51	0.568627	1
30.05.01.18 transmembrane receptor protein serine/threonine kinase signalling pathways	1	0.29	FGSG_08816	21	0.15	1.93333	0.401848
30.05.01.18.01 TGF-beta-receptor signalling pathway	1	0.29	FGSG_08816	11	0.07	4.14286	0.235927
30.05.02 non-enzymatic receptor mediated signalling	2	0.59	FGSG_16299 FGSG_08816	86	0.62	0.951613	1
30.05.02.20 Wnt signalling pathway	1	0.29	FGSG_16299	14	0.1	2.9	0.29002
30.05.02.24 G-protein coupled receptor signalling pathway	1	0.29	FGSG_08816	38	0.27	1.07407	0.605648
32 CELL RESCUE, DEFENSE AND VIRULENCE	29	8.68	FGSG_00051 FGSG_01868 FGSG_02117 FGSG_02119 FGSG_04188 FGSG_03686 FGSG_03588 FGSG_03447 FGSG_03243 FGSG_02844 FGSG_16190 FGSG_16299 FGSG_16353 FGSG_05214 FGSG_16435 FGSG_16561 FGSG_06439 FGSG_06550 FGSG_06656 FGSG_07846 FGSG_17010 FGSG_09054 FGSG_09707 FGSG_17410 FGSG_13875 FGSG_10999 FGSG_11498 FGSG_17551 FGSG_17674	1452	10.5	0.826667	1
32.01 stress response	7	2.09	FGSG_16299 FGSG_05214 FGSG_06550 FGSG_07846 FGSG_17010 FGSG_09707 FGSG_17551	697	5.04	0.414683	1
32.01.01 oxidative stress response	1	0.29	FGSG_07846	122	0.88	0.329545	1
32.01.03 osmotic and salt stress response	1	0.29	FGSG_06550	90	0.65	0.446154	1
32.01.09 DNA damage response	3	0.89	FGSG_16299 FGSG_05214 FGSG_17551	145	1.04	0.855769	1
32.01.11 nutrient starvation response	1	0.29	FGSG_17010	52	0.37	0.783784	1
32.01.13 electromagnetic waves stress response (e.g. UV, X-ray)	1	0.29	FGSG_05214	14	0.1	2.9	0.29002
32.05 disease, virulence and defense	16	4.79	FGSG_00051 FGSG_01868 FGSG_02117 FGSG_04188 FGSG_03588 FGSG_03447 FGSG_02844 FGSG_16435 FGSG_16561 FGSG_06439 FGSG_17010 FGSG_09054 FGSG_09707 FGSG_17410 FGSG_11498 FGSG_17674	507	3.66	1.30874	0.16746
32.05.01 resistance proteins	7	2.09	FGSG_04188 FGSG_03447 FGSG_16561 FGSG_17010 FGSG_09054 FGSG_09707 FGSG_17674	172	1.24	1.68548	0.123597
32.05.01.03 chemical agent resistance	1	0.29	FGSG_03447	63	0.45	0.644444	1
32.05.03 defense related proteins	3	0.89	FGSG_01868 FGSG_02117 FGSG_11498	92	0.66	1.34848	0.384207
32.05.05 virulence, disease factors	4	1.19	FGSG_00051 FGSG_03588 FGSG_02844 FGSG_17410	222	1.6	0.74375	1
32.07 detoxification	18	5.38	FGSG_00051 FGSG_01868 FGSG_02117 FGSG_02119 FGSG_04188 FGSG_03686 FGSG_03447 FGSG_03243 FGSG_16190 FGSG_16353 FGSG_06656 FGSG_07846 FGSG_17010 FGSG_09054 FGSG_09707 FGSG_13875 FGSG_11498 FGSG_17674	520	3.76	1.43085	0.0804875
32.07.01 detoxification involving cytochrome P450	5	1.49	FGSG_01868 FGSG_02117 FGSG_03686 FGSG_16190 FGSG_11498	111	0.8	1.8625	0.131152
32.07.03 detoxification by modification	3	0.89	FGSG_16353 FGSG_07846 FGSG_13875	60	0.43	2.06977	0.176577
32.07.05 detoxification by export	4	1.19	FGSG_04188 FGSG_03447 FGSG_17010 FGSG_17674	139	1	1.19	0.433743
32.07.09 detoxification by degradation	2	0.59	FGSG_00051 FGSG_03243	38	0.27	2.18519	0.233659
32.10 degradation / modification of foreign (exogenous) compounds	4	1.19	FGSG_03243 FGSG_16353 FGSG_13875 FGSG_10999	77	0.55	2.16364	0.115669
32.10.07 degradation / modification of foreign (exogenous) polysaccharides	1	0.29	FGSG_10999	31	0.22	1.31818	0.531822
32.10.09 degradation / modification of foreign (exogenous) ester compounds	2	0.59	FGSG_03243 FGSG_16353	23	0.16	3.6875	0.105621
34 INTERACTION WITH THE ENVIRONMENT	11	3.29	FGSG_00965 FGSG_15970 FGSG_03243 FGSG_16190 FGSG_16224 FGSG_16299 FGSG_16353 FGSG_05368 FGSG_09707 FGSG_10655 FGSG_17551	832	6.01	0.547421	1
34.01 homeostasis	2	0.59	FGSG_16299 FGSG_10655	336	2.43	0.242798	1
34.01.01 homeostasis of cations	1	0.29	FGSG_10655	290	2.09	0.138756	1
34.01.01.01 homeostasis of metal ions (Na, K, Ca etc.)	1	0.29	FGSG_10655	208	1.5	0.193333	1
34.03 membrane excitability	2	0.59	FGSG_03243 FGSG_16353	39	0.28	2.10714	0.242643
34.03.01 synaptic transmission	2	0.59	FGSG_03243 FGSG_16353	36	0.26	2.26923	0.215759
34.03.03 regulation, generation and propagation of action potential	2	0.59	FGSG_03243 FGSG_16353	19	0.13	4.53846	0.075962
34.05 cell motility	4	1.19	FGSG_00965 FGSG_15970 FGSG_16224 FGSG_17551	138	0.99	1.20202	0.428338
34.05.01 cell migration	4	1.19	FGSG_00965 FGSG_15970 FGSG_16224 FGSG_17551	84	0.6	1.98333	0.145435
34.07 cell adhesion	1	0.29	FGSG_16299	38	0.27	1.07407	0.605648
34.07.01 cell-cell adhesion	1	0.29	FGSG_16299	11	0.07	4.14286	0.235927
34.11 cellular sensing and response to external stimulus	4	1.19	FGSG_16190 FGSG_16353 FGSG_05368 FGSG_09707	350	2.53	0.470356	1
34.11.03 chemoperception and response	2	0.59	FGSG_16353 FGSG_09707	165	1.19	0.495798	1
34.11.12 perception of nutrients and nutritional adaptation	2	0.59	FGSG_16190 FGSG_05368	88	0.63	0.936508	1
36 SYSTEMIC INTERACTION WITH THE ENVIRONMENT	1	0.29	FGSG_00051	18	0.13	2.23077	0.35625
[truncated: 27 more rows]
